# Supplementary material for: Intermolecular Diastereoselective Annulation of Azaarenes into Fused N-heterocycles by Ru(II) Reductive Catalysis
Source: Research Square preprint supplement (doi:10.21203/rs.3.rs-963422/v1), 2021-11-11
Supplement: Supplementary file 1 [file 0253ca0b8c0749f91f2171ac.docx]

**Supplementary Information**

**Intermolecular Diastereoselective Annulation of Azaarenes into Fused N-heterocycles by Ru(II) Reductive Catalysis**

**He Zhao,1 Yang Wu,1 Chenggang Ci,2 Zhenda Tan,1 Jian Yang, 1 Huanfeng Jiang,1 Pierre. H. Dixneuf,3 and Min Zhang1🖂**

1 Key Lab of Functional Molecular Engineering of Guangdong Province, School of Chemistry and Chemical Engineering, South China University of Technology, Guangzhou 510641, China.

2 Key Laboratory of Computational Catalytic Chemistry of Guizhou Province, Department of Chemistry and Chemical Engineering, Qiannan Normal University for Nationalities, Duyun 558000, China

3 University of Rennes, ISCR, UMR CNRS 6226, 35000 Rennes, France.

🖂Correspondence: minzhang@scut.edu.cn (M.Z.).

**Table of contents**

| General information | S2 |
| --- | --- |
| Substrates Preparation | S3-S4 |
| Typical procedure for the synthesis of product **C1** | S6 |
| Crystal data of **C1** | S6-S7 |
| NOESY spectra of compounds **C1, C8** and **D1** | S8-S9 |
| Control experiments | S9-S12 |
| Synthetic utility | S12-S14 |
| Computational Details | S14 |
| Potential energy surface for the formation of [RuIIHCl] employing different bases | S14-S15 |
| References | S17 |
| Analytical data of the obtained compounds | S18-S46 |
| Cartesian coordinates and absolute energies for all species | S47-S116 |

**General information**

All the obtained products were characterized by melting points (m.p.), 1H-NMR, 13C-NMR. Melting points (m.p.) were performed using a Büchi AG M-565. 1H-NMR, 13C-NMR and NOESY spectra were obtained on Bruker-400 or Bruker-500 and referenced to 7.26 ppm for chloroform solvent or 2.54 ppm for dimethyl sulfoxide solvent with TMS as internal standard (0 ppm). Chemical shifts were reported in parts per million (ppm, δ) downfield from tetramethylsilane. Proton coupling patterns are described as singlet (s), doublet (d), triplet (t), multiplet (m). Analytical HPLC was run with an Agilent 1260 Infinity, equipped with a Daicel CHIRALPAK IA (4.6 mm × 250 mm) and a Agilent LC1260 Ⅱ DAD-G7115A detector. The high resolution mass spectrums were recorded on a Bruker maXis impact mass spectrometer. X-Ray diffraction data of one these crystals were collected on a Bruker SMART diffractometer. And the structures were solved by direct methods SHELXS-2014.

All the reagents were purchased from *Bide Pharmatech Ltd.* and *Energy Chemical*. All solvents were purchased from *Greagent* (Shanghai Titansci incorporated company) and used without further purification. All reactions were heated by metal sand bath (WATTCAS, LAB-500, https://www.wattcas.com). Column chromatography was performed on silica gel (200-300 mesh). Reactions were monitored by using thin layer chromatography (TLC) (Qingdao Jiyida silica gel reagent factory GF254).

Noteworthy, the employed N-heteroarenes are named **A’**, the N-heteroarenium salts are named **A**, the anilines are named **B**, and the obtained products are named **C** and **D**.

**Optimization of reaction conditions**

**Table S1. Optimization of reaction conditions** *a*

| Entry | Catalyst | Base | Solvent | T (oC) | Yields of **C1***b* |
| --- | --- | --- | --- | --- | --- |
| 1 | Ru3(CO)12/Xantphos | Mg(OMe)2 | methanol | 65 | 0 |
| 2 | RuHCl(CO)(PPh3)3 | Mg(OMe)2 | methanol | 65 | 0 |
| 3 | Cp*IrCl(COD) | Mg(OMe)2 | methanol | 65 | 74 |
| 4 | [IrCp*Cl2]2 | Mg(OMe)2 | methanol | 65 | 85 |
| 5 | Co2(CO)8 | Mg(OMe)2 | methanol | 65 | 0 |
| 6 | FeCl3 | Mg(OMe)2 | methanol | 65 | 0 |
| 7 | MnBr(CO)5/Xantphos | Mg(OMe)2 | methanol | 65 | 0 |
| 8 | NiCl2(PPh)2 | Mg(OMe)2 | methanol | 65 | 0 |
| 9 | [Ru(*p*-cymene)Cl2]2 | Mg(OMe)2 | methanol | 65 | 90 |
| 10 | - | Mg(OMe)2 | methanol | 65 | 0 |
| 11 | [Ru(*p*-cymene)Cl2]2 | K2CO3 | methanol | 65 | < 10 |
| 12 | [Ru(*p*-cymene)Cl2]2 | *t*-BuONa | methanol | 65 | 0 |
| 13 | [Ru(*p*-cymene)Cl2]2 | *t*-BuOK | methanol | 65 | < 10 |
| 14 | [Ru(*p*-cymene)Cl2]2 | NaOH | methanol | 65 | 0 |
| 15 | [Ru(*p*-cymene)Cl2]2 | MeOK | methanol | 65 | < 10 |
| 16 | [Ru(*p*-cymene)Cl2]2 | CsCO3 | methanol | 65 | 0 |
| 17 | [Ru(*p*-cymene)Cl2]2 | Et3N | methanol | 65 | 0 |
| 18 | [Ru(*p*-cymene)Cl2]2 | MgCl2 | methanol | 65 | 0 |
| 19 | [Ru(*p*-cymene)Cl2]2 | NaOTf | methanol | 65 | 0 |
| 20 | [Ru(*p*-cymene)Cl2]2 | - | methanol | 65 | 0 |
| 21 | [Ru(*p*-cymene)Cl2]2 | Mg(OMe)2 | DMF | 65 | 0 |
| 22 | [Ru(*p*-cymene)Cl2]2 | Mg(OMe)2 | 1,4-dioxane | 65 | 0 |
| 23 | [Ru(*p*-cymene)Cl2]2 | Mg(OMe)2 | ethanol | 65 | 61 |
| 24 | [Ru(*p*-cymene)Cl2]2 | Mg(OMe)2 | methanol | 75 | 86 |
| 25 | [Ru(*p*-cymene)Cl2]2 | Mg(OMe)2 | methanol | 55 | 91 |
| 26 | [Ru(*p*-cymene)Cl2]2 | Mg(OMe)2 | methanol | 45 | 58 |
| 27 | [Ru(*p*-cymene)Cl2]2 | Mg(OMe)2 | methanol | 55 | (33, 25)*c* |
| 28 | [Ru(*p*-cymene)Cl2]2 | Mg(OMe)2 | methanol | 55 | (42, 30)*d* |
| *a*Unless otherwise stated, the reaction in MeOH (1 mL) was performed with A**1** (0.2 mmol), **B1** (0.2 mmol), cat. (1 mol %), base (0.75 eq), (CH2O)n (10 eq) at 65 oC for 18 h under N2 protection. *b*NMR yield by using anisole as the internal standard.*c*Yields are with respect to 0.5 eq and 0.3 eq Mg(OMe)2, respectively. *d*Yields are with respect to 8 eq and 5 eq (CH2O)n, respectively. | | | | | |

**Substrate preparation**

**Synthesis of N-heteroarenium Bromide Salts**

**Method 1**: Synthesis of compound **A1**: quinoline (3 mmol), benzyl bromide (6 mmol) and acetone (5 mL) were introduced in a flask (50 mL). The resulting mixture was then stirred at room temperature for 24 h. Then, the solvent was removed. The reaction mixture was washed with small amount of diethyl ether and finally dried under vacuum to get the salt **A1**.

**Method 2**: Synthesis of compound **A16**: quinoline (3 mmol), (2-bromoethyl)benzene (3 mmol) and toluene (3 mL) were introduced in a flask (50 mL). The resulting mixture was stirred at 110 oC for 24 h. Then, the solvent was removed. The reaction mixture was washed with small amount of diethyl ether and finally dried under vacuum to get the salt **A16**.

(1) 1-(2-(benzyloxy)-2-oxoethyl)quinolin-1-ium bromide (**A19**)

Method 1; Yellow solid; 1H NMR (400 MHz, DMSO-*d*6) δ 9.68 (d, *J* = 4.0Hz, 1H), 9.47 (d, *J* = 8.4 Hz, 1H), 8.56 (d, *J* = 8.0 Hz, 1H), 8.49 (d, *J* = 9.0 Hz, 1H), 8.37 – 8.23 (m, 2H), 8.08 (t, *J* = 7.6 Hz, 1H), 7.46 – 7.30 (m, 5H), 6.33 (s, 2H), 5.26 (s, 2H).13C NMR (101 MHz, DMSO-*d*6) δ 166.6, 151.7, 149.6, 138.7, 136.6, 135.4, 131.2, 130.6, 129.8, 129.0, 128.9, 128.6, 122.6, 119.4, 68.1, 57.9. HRMS (ESI): Calcd. for C18H16BrNO2 [M–Br]+: 278.1181; found: 278.1173.

(2) ethene,1,1'-(propane-1,3-diyl)bis(quinolin-1-ium) bromide (**A21**)

Method 1; Black solid; 1H NMR (500 MHz, DMSO-*d*6) δ 9.77 (d, *J* = 5.2 Hz, 1H), 9.37 (d, *J* = 8.4 Hz, 1H), 8.69 (d, *J* = 9.0 Hz, 1H), 8.58 – 8.52 (m, 1H), 8.33 – 8.22 (m, 3H), 8.08 (t, *J* = 7.6 Hz, 1H), 5.16 (t, *J* = 7.6 Hz, 3H), 2.19 – 2.03 (m, 3H), 1.59-1.63 (m, 1H). 13C NMR (101 MHz, DMSO-*d*6) δ 150.2, 147.8, 137.8, 136.2, 131.2, 130.3, 130.1, 122.7, 122.6, 119.6, 57.4, 29.3, 23.1. HRMS (ESI): Calcd. for C23H25Br2N2 [M–Br+H]+: 329.2018; found: 329.2012.

**Scheme S1. Substrates employed for the reaction.**

**Typical procedure for the synthesis of product C1**

Under N2 atmosphere, [Ru(*p*-cymene)Cl2]2 (1 mol %), 1-benzylquinolin-1-ium bromide **A1** (0.2 mmol), N-ethylaniline **B1** (0.2 mmol), Mg(OMe)2 (0.75 eq, 12.9 mg)，(CH2O)n (10.0 eq, 60 mg) and methanol (1 mL) were introduced in a Schlenk tube, successively. Then the Schlenk tube was closed and the resulting mixture was stirred at 55 oC for 18 h. After cooling down to room temperature, the mixture was extracted with ethyl acetate, washed with 5% Na2CO3 solution, dried with anhydrous sodium sulfate, and then concentrated by removing the solvent under vacuum. Finally, the residue was purified by preparative TLC on silica to give 12-benzyl-5-ethyl-5,6,6a,7,12,12a-hexahydrodibenzo[*b*,*h*][1,6]naphthyridine **C1**.

**Scheme S2. Substrate N-substituted aniline B employed for the reaction.**

**Single crystal X-ray diffraction data of C1**


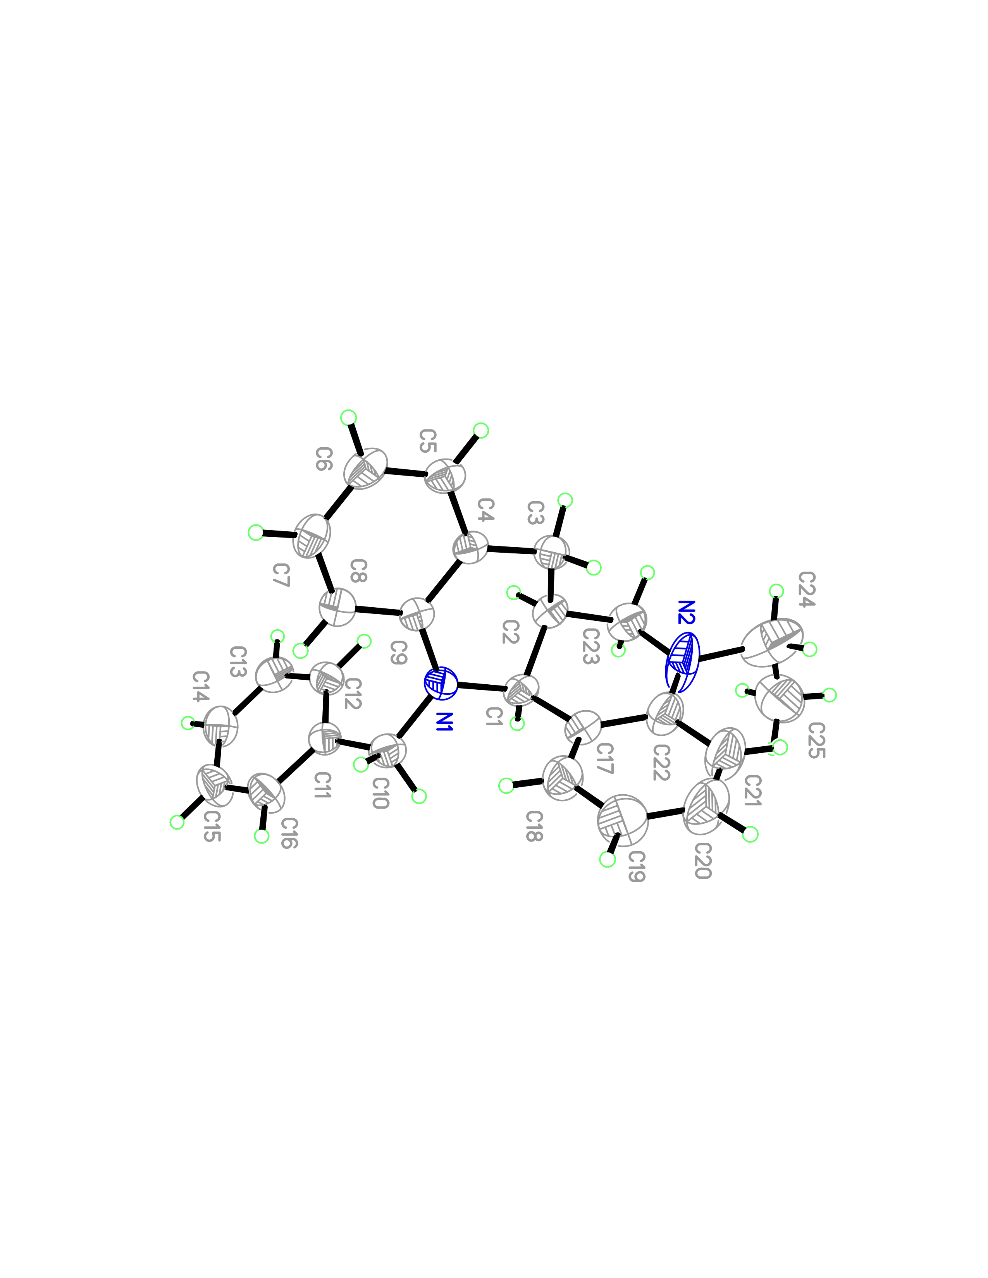


**Fig. S1 Molecular structure of C1 (CCDC 2051637) is displayed with thermal ellipsoids set at 30% probability.**

Yellow block-like single crystals of **C1** were grown by layering a THF solution with n-hexane at ambient temperature. X-Ray diffraction data of one these crystals were collected on a Bruker APEX-II CCD. The measurements were performed with Mo-Kα radiation (λ = 0.71073 Å). Data were collected at 293 (2) K, using the phi and omega scans to a maximum θ value of 29.275°. The data were refined by full-matrix least-squares techniques on F2 with SHELXL-2014. And the structures were solved by direct methods SHELXL-2014. All the non-hydrogen atoms were refined anisotropically. The hydrogen atoms were included at geometrically idealized positions. An ORTEP representation of the structure is shown below.

**Table S2. Crystal data and structure refinement for C1.**

| Identification code **C1**  Empirical formula C25H26N2  Formula weight 354.48  Temperature 293(2) K  Wavelength 0.71073 Å  Crystal system Orthorhombic  Space group P2**1**2**1**2**1**  Unit cell dimensions a = 12.8508(19) Å = 90°.  b = 14.337(3) Å = 90°.  c = 21.517(5) Å  = 90°.  Volume 3964.4(13) Å3  Z 8  Density (calculated) 1.188 Mg/m3  Absorption coefficient 0.069 mm-1  F(000) 1520  Crystal size 0.220 x 0.200 x 0.180 mm3  Theta range for data collection 3.415 to 29.275°.  Index ranges -17<=h<=11, -17<=k<=19, -27<=l<=27  Reflections collected 19084  Independent reflections 9204 [R(int) = 0.0465]  Completeness to theta = 25.242° 99.6 %  Absorption correction Semi-empirical from equivalents  Refinement method Full-matrix least-squares on F2  Data / restraints / parameters 9204 / 233 / 543  Goodness-of-fit on F2 0.965  Final R indices [I>2sigma(I)] R1 = 0.0640, wR2 = 0.1025  R indices (all data) R1 = 0.1826, wR2 = 0.1425  Absolute structure parameter -1.6(10)  Extinction coefficient n/a  Largest diff. peak and hole 0.154 and -0.177 e.Å-3 |
| --- |

**NOESY spectra of partial obtained compounds**

**NOESY spectrum of C1**


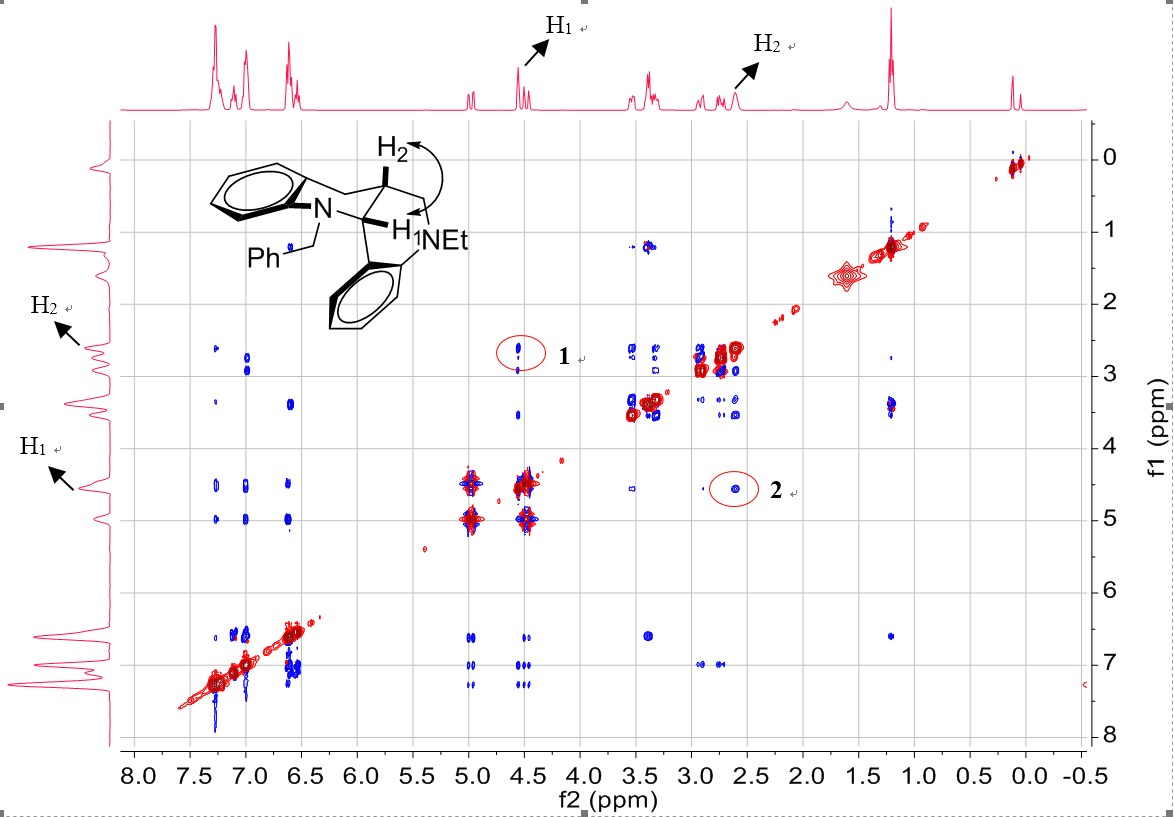


**Fig. S2.NOESY spectrum of compound C1.**

**NOESY spectrum of C8**


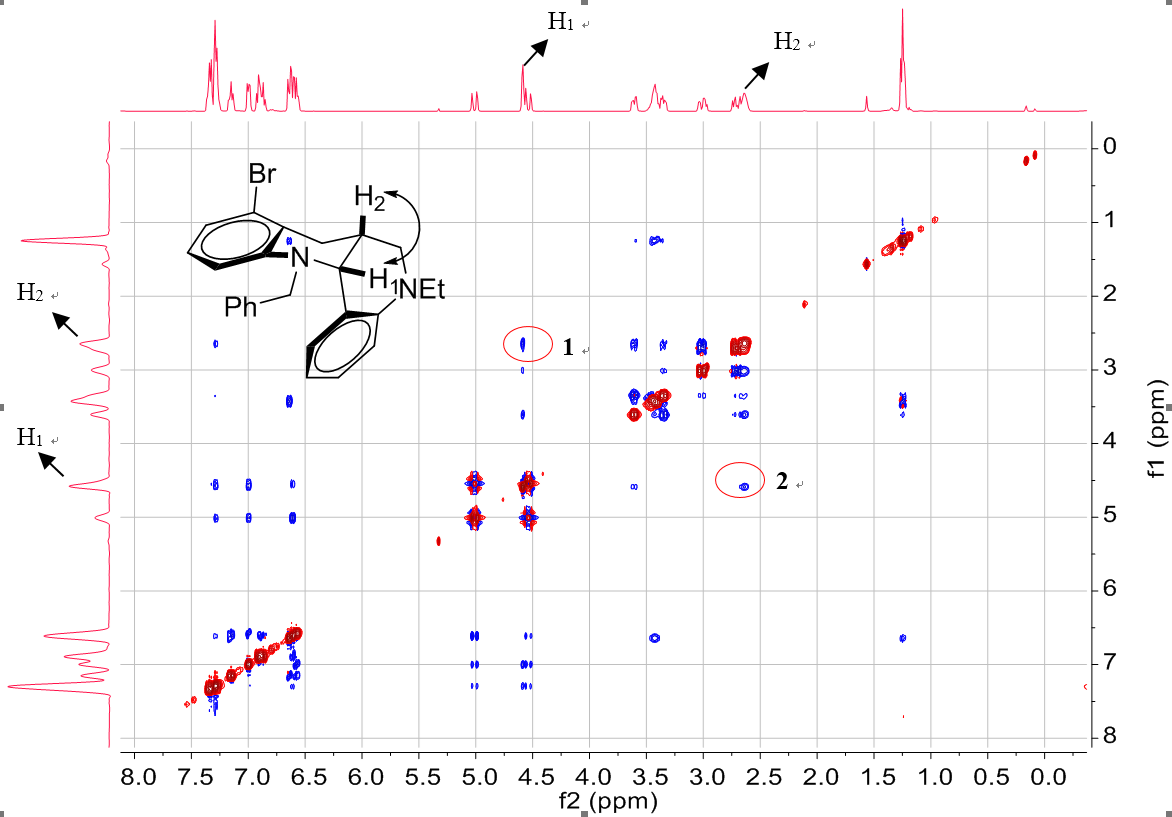


**Fig. S3 NOESY spectrum of compound C8.**

**NOESY spectrum of D1**

**
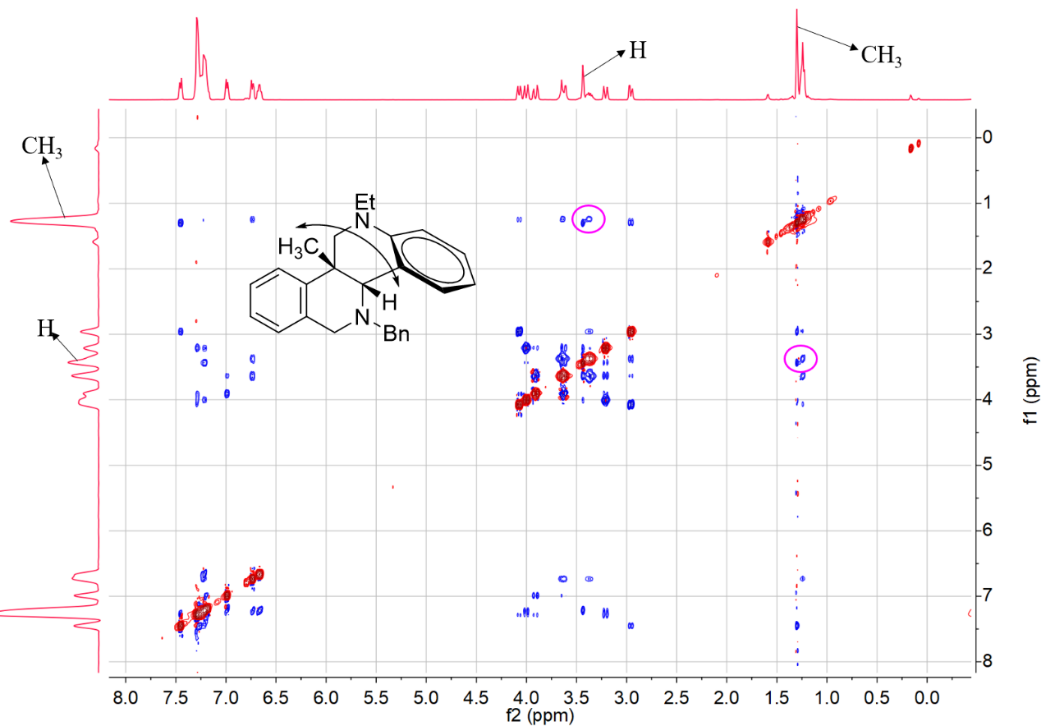
**

**Fig. S4****NOESY spectrum of compound D1.**

**Control experiments**

**Scheme S3** **Supplementary control experiments.**

**(1) Synthesis of 1-benzyl-1,2-dihydroquinoline (int-1)**

To a suspension of 1-benzylquinolin-1-ium bromide **A1** (3.0 mmol) in 25 mL of THF was slowly added lithium aluminium hydride (3.0 mmol) at room temperature. The reaction was stirred at room temperature for 20 min, then slowly quenched with 0.1 mL of water and stirred for an additional 10 min. To the reaction was added 0.2 mL 10 % sodium hydroxide solution and stirred at room temperature for an additional 10 min. The reaction was added 5% Na2CO3 solution and the resulting mixture was extracting with ethyl acetate, dried with anhydrous sodium sulfate, and then concentrated by removing the solvent under vacuum to give the unstable crude 1-benzyl-1,2-dihydroquinoline as a yellow oil. 1H NMR (400 MHz, Chloroform-*d*) δ 7.51 – 7.38 (m, 5H), 7.12 (d, *J* = 8.0 Hz, 1H), 7.02 (d, *J* = 5.8 Hz, 1H), 6.74 (t, *J* = 7.4 Hz, 1H), 6.61 (d, *J* = 8.2 Hz, 1H), 6.50 (d, *J* = 2.2 Hz, 1H), 5.78 (dt, *J* = 9.9, 3.8 Hz, 1H), 4.50 (s, 2H), 4.33 (dd, *J* = 3.8, 2.0 Hz, 2H). 13C NMR (101 MHz, CDCl3) δ 145.5, 137.6, 129.3, 128.8, 127.4, 127.2, 127.1, 126.7, 122.1, 121.9, 117.0, 110.2, 53.8, 50.6. HRMS (ESI): Calcd. for C16H16N [M+H]+: 222.1277; found: 222.1276.

**Synthesis of 2-benzyl-1,2-dihydroisoquinoline (int-6)**

The synthetic procedure of **int-6** is similar to that of **int-1** described above. Yellow oil; 1H NMR (500 MHz, CDCl3) δ 7.30 – 7.24 (m, 4H), 7.22 (td, *J* = 6.6, 6.1, 2.6 Hz, 1H), 7.03 (t, *J* = 7.7 Hz, 1H), 6.89 (td, *J* = 7.4, 1.2 Hz, 1H), 6.82 (d, *J* = 7.6 Hz, 1H), 6.76 (d, *J* = 7.4 Hz, 1H), 6.17 (d, *J* = 7.4 Hz, 1H), 5.26 (d, *J* = 7.4 Hz, 1H), 4.13 (s, 2H), 4.03 (s, 2H).13C NMR (126 MHz, CDCl3) δ 139.0, 137.4, 134.0, 128.8, 128.3, 127.7, 127.7, 125.7, 124.9, 122.9, 98.3, 59.4, 51.1.

**(2) Detection of the ester products by GC-MS**

By replacing MeOH with *t*-BuOH as the solvent, the GC-MS analysis of the model reaction shows the formation of *t*-butyl formate, which is formed via the addition of alcohol to formaldehyde followed by a base-mediated anion exchange with the ruthenium catalyst and Ru-catalyzed *β*-hydride elimination. Meanwhile, such a process generates the reductive species [HRuIIX], which is involved in the reductive annulation reaction.


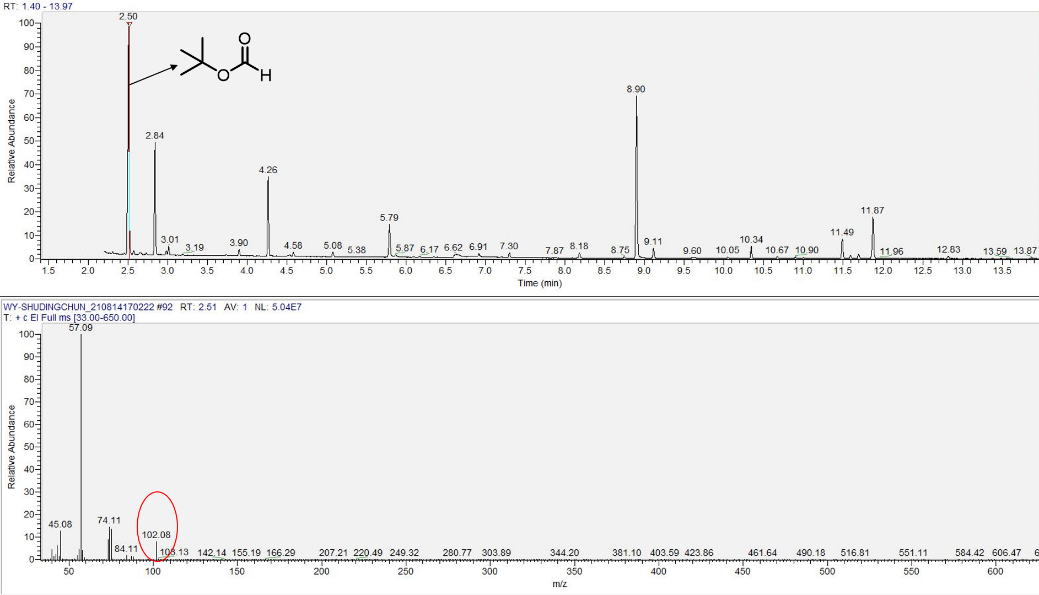


**Fig. S5 GC-MS analysis of the model reaction by replacing MeOH with *t*-BuOH as the solvent.**

**
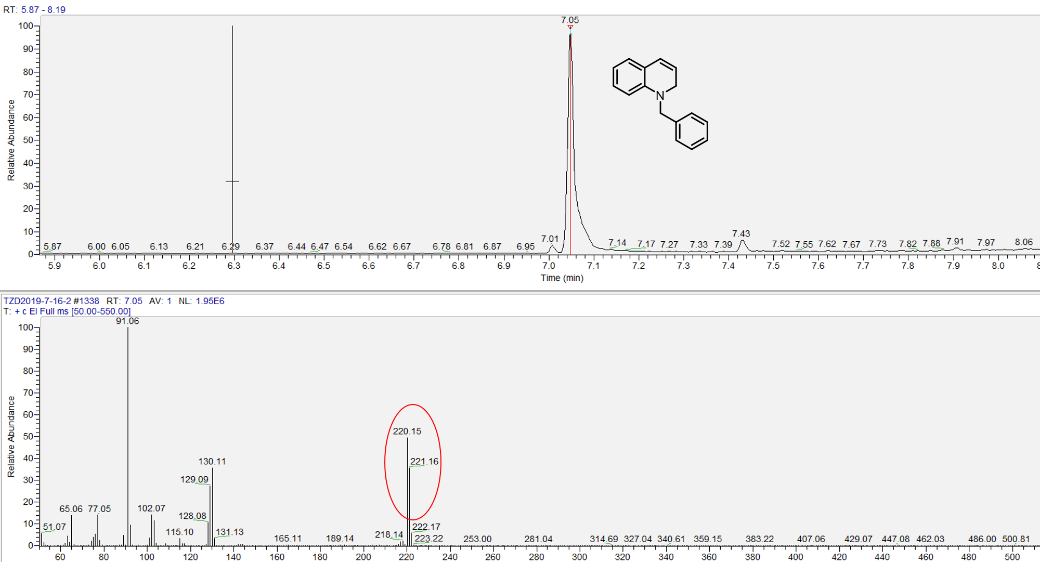
**

**Fig. S6. GC-MS spectrum of int-1.**

**
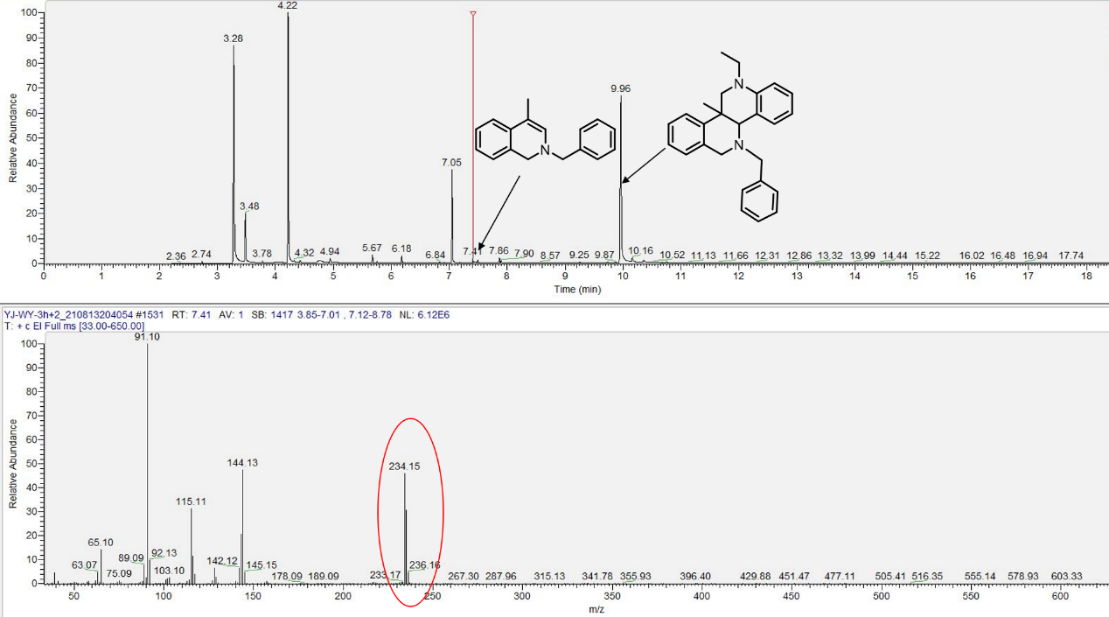
**

**Fig. S7. GC-MS spectrum of int-9.**

**(3)** **Deuterium Experiments**

**
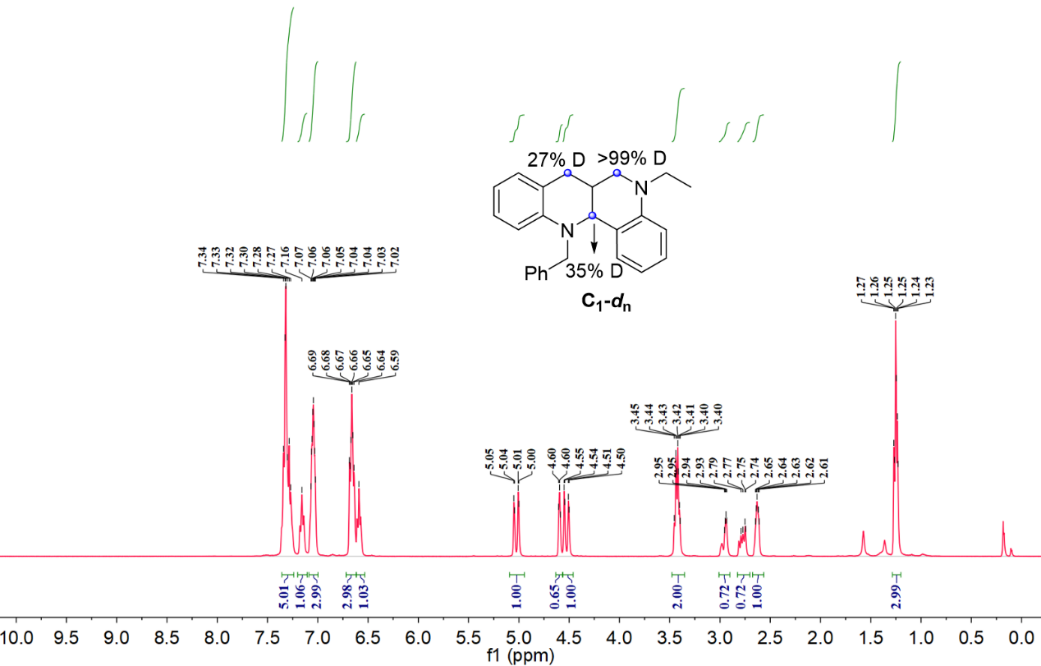
**

**Fig. S8 1H-NMR spectrum of C1-*d*n**

**
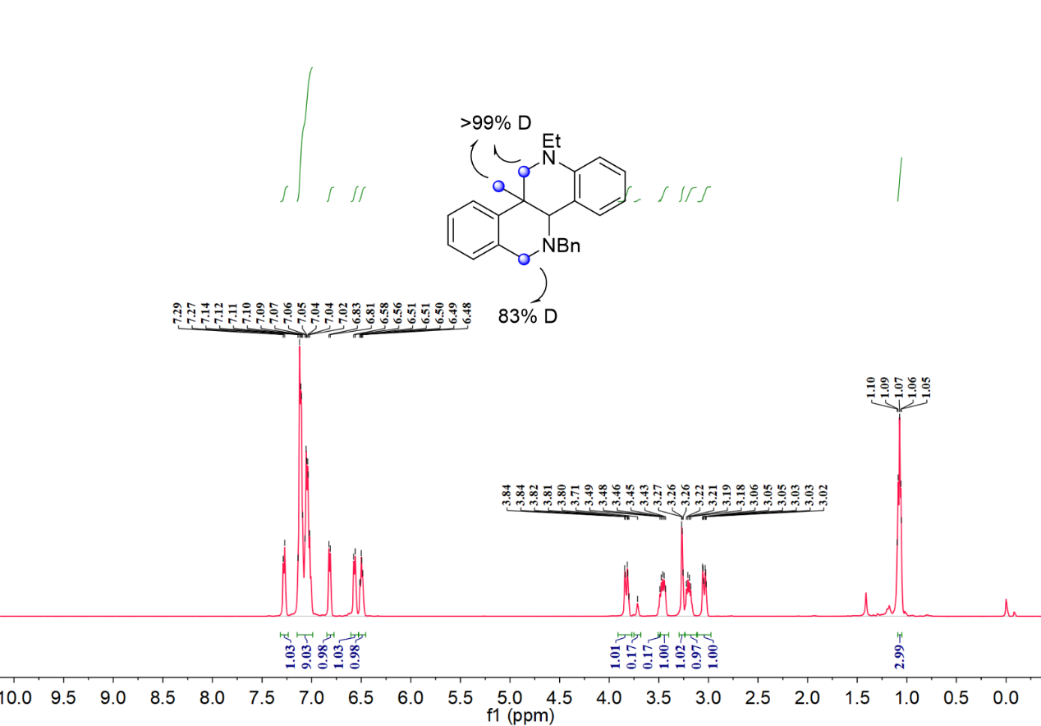
**

**Fig. S9** **1H-NMR spectrum of D1-*d*n.**

**Synthetic Utility**

**Synthesis of Compound C51**

To a suspension of quinoline-6-carboxylic acid (1 mmol) in CH2Cl2 was added DMAP (4-(dimethylamino)-pyridine, 2 mmol) in one portion at room temperature. The reaction mixture was stirred for 10 min at room temperature. N-(3-(Dimethylamino)propyl)-N’-ethylcarbodiimide hydrochloride (EDC, 1 mmol) was added at 0 oC. Then the resultant suspension was stirred for 10 min at 0 oC. A solution of (-)-Bomeol (0.8 mmol) in CH2Cl2 was added at 0 °C. The cooling bath was removed, and the reaction mixture was stirred at room temperature for 16 h. The solution was diluted by the addition of saturated aqueous NH4Cl solution and CH2Cl2 at room temperature. The organic phase was dried with anhydrous sodium sulfate, and then concentrated by removing the solvent under vacuum. Finally, the residue was purified by preparative TLC on silica to give a white solid **A30’** (234.8 mg, 95% yield).1

Under N2 atmosphere, **A30’** (0.2 mmol), 4-(bromomethyl)-2-chloro-1-methoxybenzene (0.2 mmol), and toluene (1.0 mL) were introduced in a Schlenk tube, successively. The Schlenk tube was closed and the resulting mixture was stirred at 110 oC for 12 h. Then the solvent was removed and to the reaction were added [Ru(*p*-cymene)Cl2]2 (1 mol %), N-ethylaniline **B1** (0.2 mmol), Mg(OMe)2 (75 mol %)，paraformaldehyde (10 eq) and methanol (1 mL) The reaction was performed at 55 oC for 18 h. After cooling down to room temperature, the resulting mixture was extracting with CH2Cl2, washed with 5% Na2CO3 solution, dried with anhydrous sodium sulfate, and then concentrated by removing the solvent under vacuum. Finally, the residue was purified by preparative TLC on silica to give **C51** (54 % yield).

**Synthesis of Compound C52**

To a suspension of quinoline-6-carboxylic acid (1 mmol) in CH2Cl2 was added DMAP (4-(dimethylamino)-pyridine, 2 mmol) in one portion at room temperature. The reaction mixture was stirred for 10 min at room temperature. N-(3-(Dimethylamino)propyl)-N’-ethylcarbodiimide hydrochloride (EDC, 1 mmol) was added at 0 oC. Then the resultant suspension was stirred for 10 min at 0 oC. A solution of 1-Adamantanol (0.8 mmol) in CH2Cl2 was added at 0 °C. The cooling bath was removed, and the reaction mixture was stirred at room temperature for 16 h. The solution was diluted by the addition of saturated aqueous NH4Cl solution and CH2Cl2 at room temperature. The organic phase was dried with anhydrous sodium sulfate, and then concentrated by removing the solvent under vacuum. Finally, the residue was purified by preparative TLC on silica to give a white solid **A31’** (235.6 mg, 91% yield).1

Under N2 atmosphere, **A31’** (0.2 mmol), benzyl bromide (0.2 mmol), and toluene (1.0 mL) were introduced in a Schlenk tube, successively. The Schlenk tube was closed and the resulting mixture was stirred at 110 oC for 12 h. Then the solvent was removed and to the reaction were added [Ru(*p*-cymene)Cl2]2 (1 mol %), N-ethylaniline **A50** (0.2 mmol), Mg(OMe)2 (75 mol %)，Paraformaldehyde (10 equiv) and methanol (1 mL). The reaction was performed at 55 oC for 18 h. After cooling down to room temperature, the resulting mixture was extracting with CH2Cl2, washed with 5% Na2CO3 solution, dried with anhydrous sodium sulfate, and then concentrated by removing the solvent under vacuum. Finally, the residue was purified by preparative TLC on silica to give **C52** (44 % yield).

**Synthesis of Compound C53**

To a solution of 6-aminoquinoline (10 mmol, 1.44 g) in anhydrous CH2Cl2 was added triethylamine (12 mmol, 1.21 g) and (-)-(1*S*,4*R*)-Camphanoyl chloride (11 mmol, 2.38 g) at 0 oC. The reaction mixture was stirred at room temperature until the reaction was completed (monitored by TLC). Water (50 mL) was added to the mixture and extracted with CH2Cl2 (30 mL). The organic phase was dried over anhydrous sodium sulfate, and concentrated under reduced pressure. The residue was purified by flash chromatography on silica gel to afford **A32’** (88% yield).2

Under N2 atmosphere, **A32’** (0.2 mmol), benzyl bromide (0.2 mmol), and toluene (1.0 mL) were introduced in a Schlenk tube, successively. The Schlenk tube was closed and the resulting mixture was stirred at 110 oC for 12 h. Then the solvent was removed and to the reaction were added [Ru(*p*-cymene)Cl2]2 (1 mol %), N-ethylaniline **a51** (0.2 mmol), Mg(OMe)2 (75 mol %)，paraformaldehyde (10 equiv) and toluene (1 mL) The reaction was performed at 55 oC for 18 h. After cooling down to room temperature, the resulting mixture was extracting with CH2Cl2, washed with 5% Na2CO3 solution, dried with anhydrous sodium sulfate, and then concentrated by removing the solvent under vacuum. Finally, the residue was purified by preparative TLC on silica to give **C53** (78 % yield).

**Debenzylation of compounds C29 and D1**

Under N2 atmosphere, 10 mol % Pd/C, **C29** (0.2 mmol, 83.2 g), HCOONH4 (2 mmol, 136 mg), and methanol (0.5 mL) were introduced in a Schlenk tube, successively. Then the Schlenk tube was closed and the resulting mixture was stirred at 65 oC for 12 h. After cooling down to room temperature, the resulting mixture was extracting with ethyl acetate, washed with H2O, dried with anhydrous sodium sulfate, and then concentrated by removing the solvent under vacuum. Finally, the residue was purified by preparative TLC on silica to give **C54** (74% yield). Similarly, compound **D1** underwent N-debenzylation under the same reaction conditions to afforded **D31** in 67% yield.

**Computational Details**

All calculations were carried out using the Gaussian 16 C.01 program package.3 The geometry optimizations were performed using hybrid B3LYP exchange correlation4-6. The LanL2DZ basis set pseudopotential7 was used for Ru atom. The 6-311G(d, p) basis set8-10 was used for remaining atoms.Vibrational frequency calculations were performed to characterize the nature of each stationary point and to make the zero-point energy (ZPE) corrections. The synchronous transit-guided quasi-Newton (QSTN) method, implemented with the Gaussian keyword QST311 was performed to located the transition states. The minimum energy path (MEP) was constructed by intrinsic reaction coordinate (IRC) theory for each reaction channel12. A tight convergence (10-12 au) criterion was employed, and the solvent CH3OH was considered using the IEF-PCM solvent model13.

**Potential energy surface for the formation of [RuIIHCl] employing different bases**

**
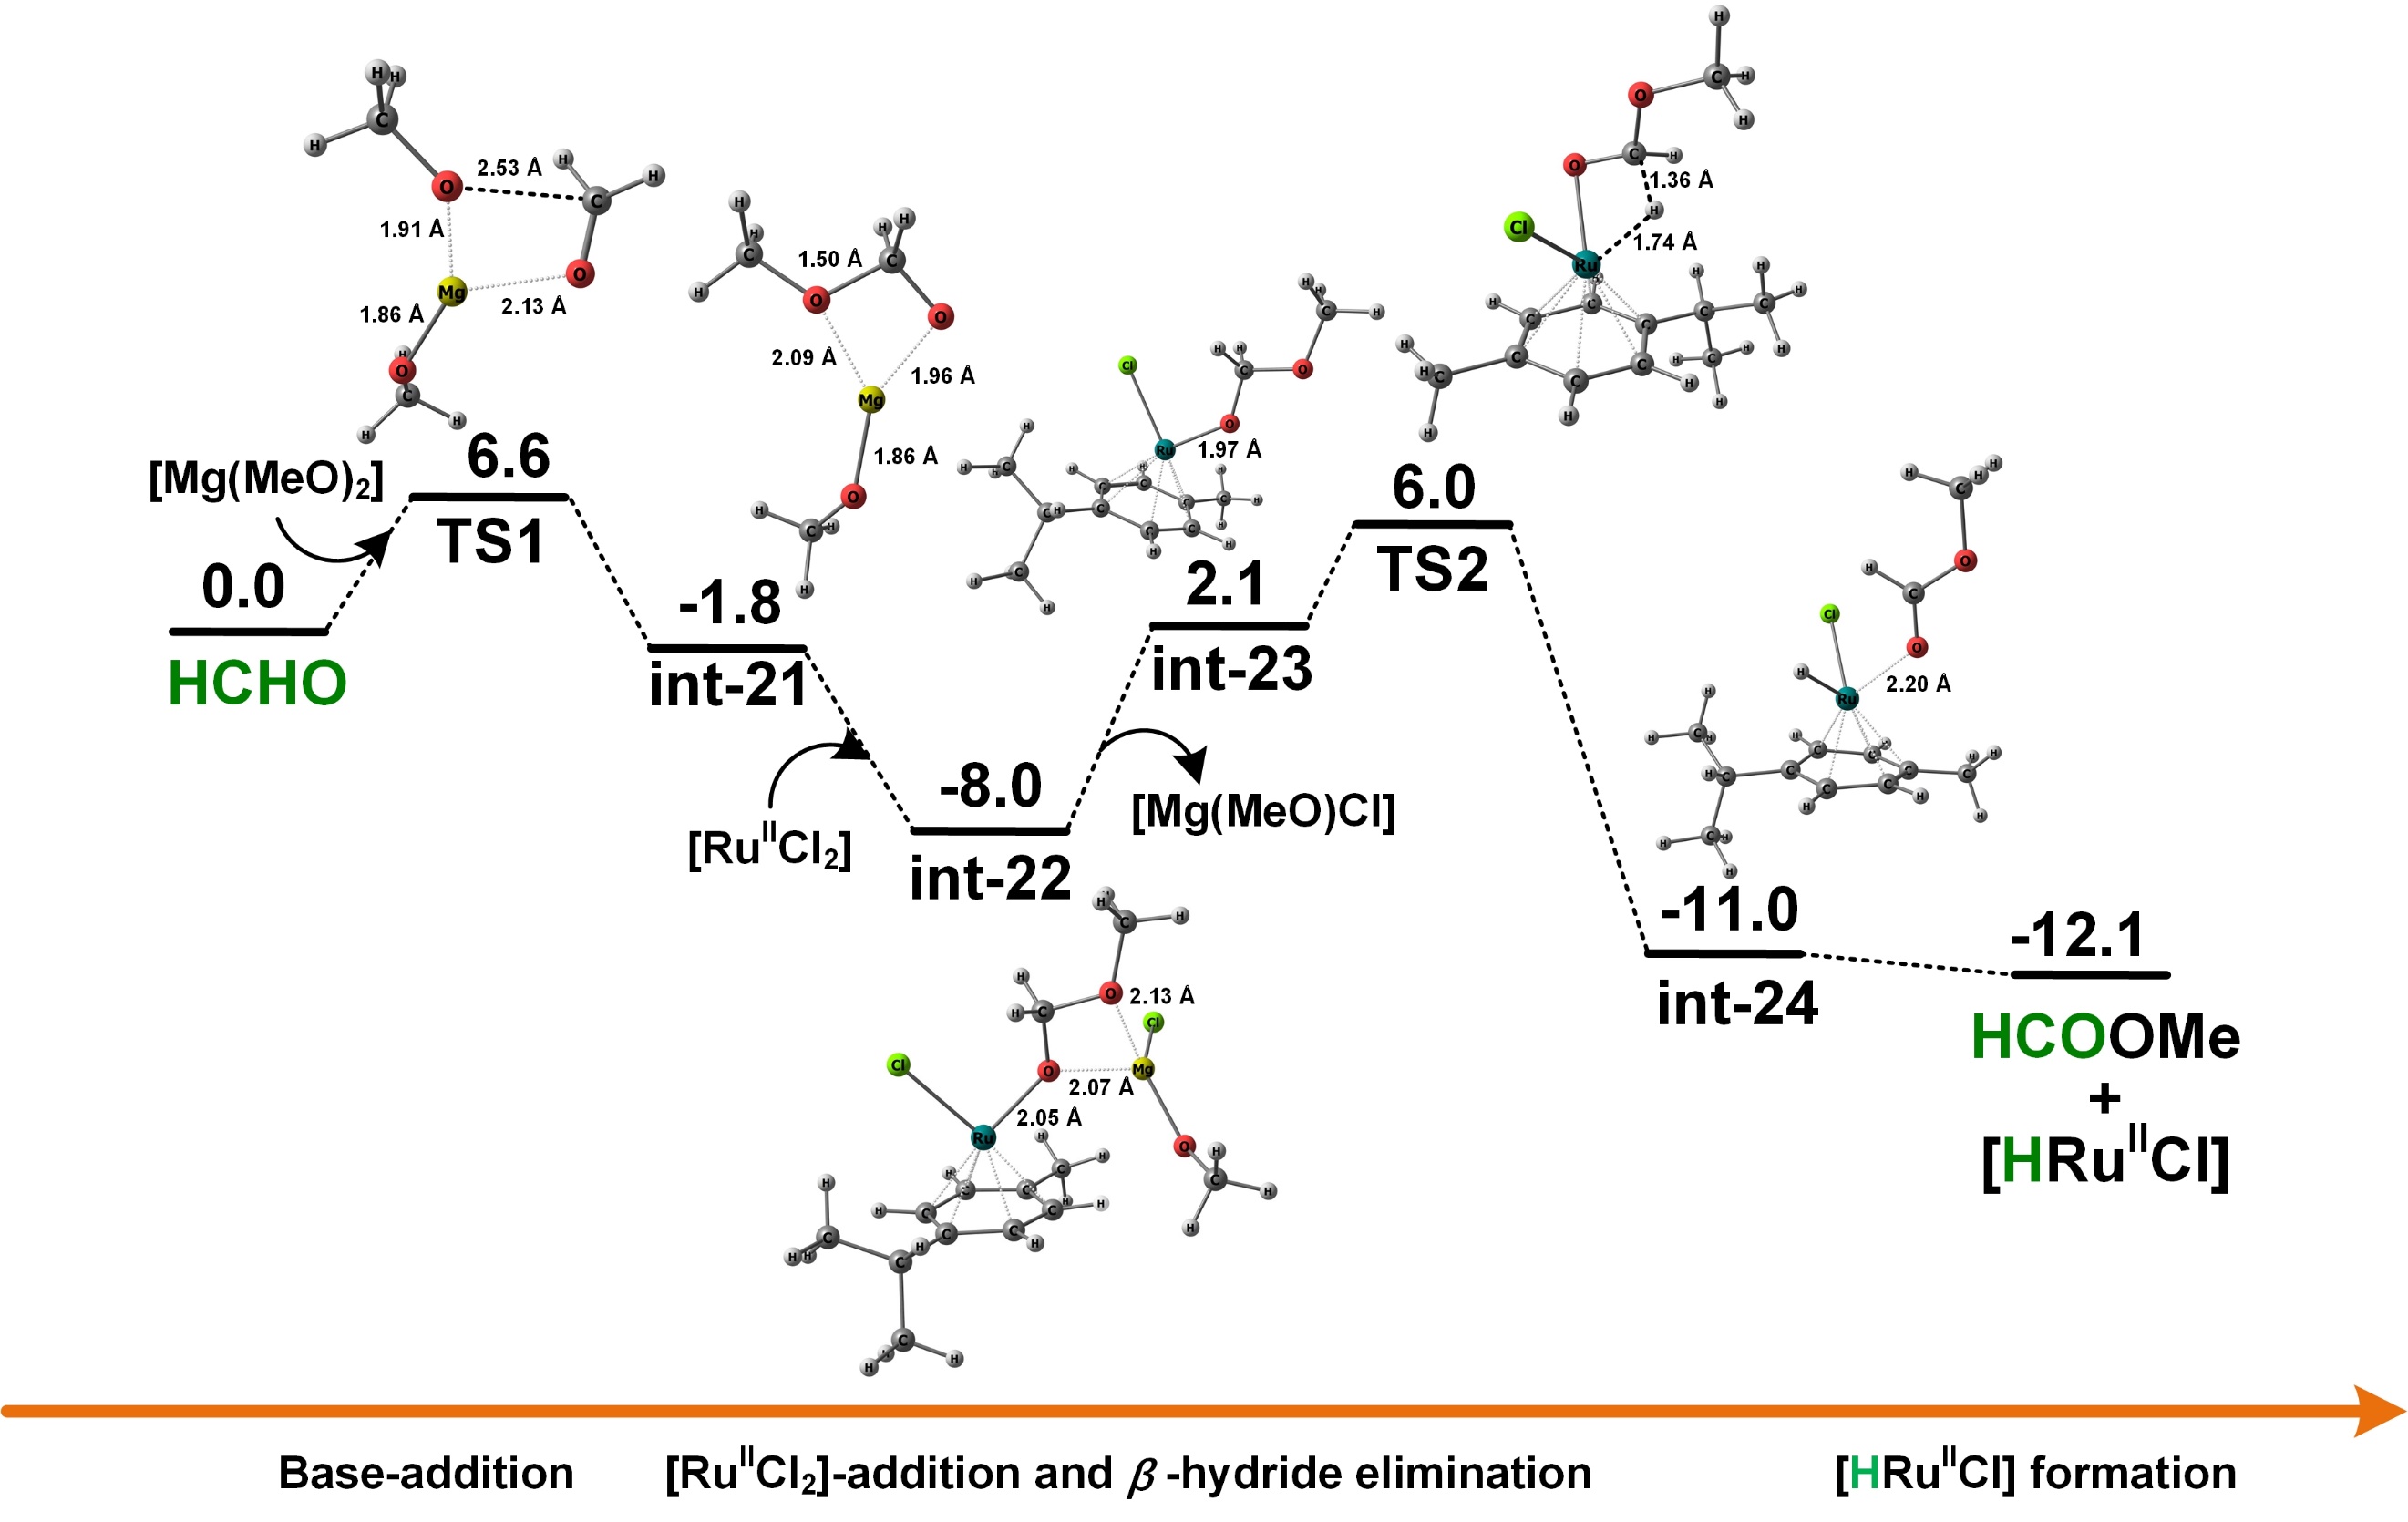
**

**Fig. S10 Potential energy surface for the formation of [RuIIHCl] employing Mg(OMe)2 as the base (free energies in kcal·mol-1).**

**
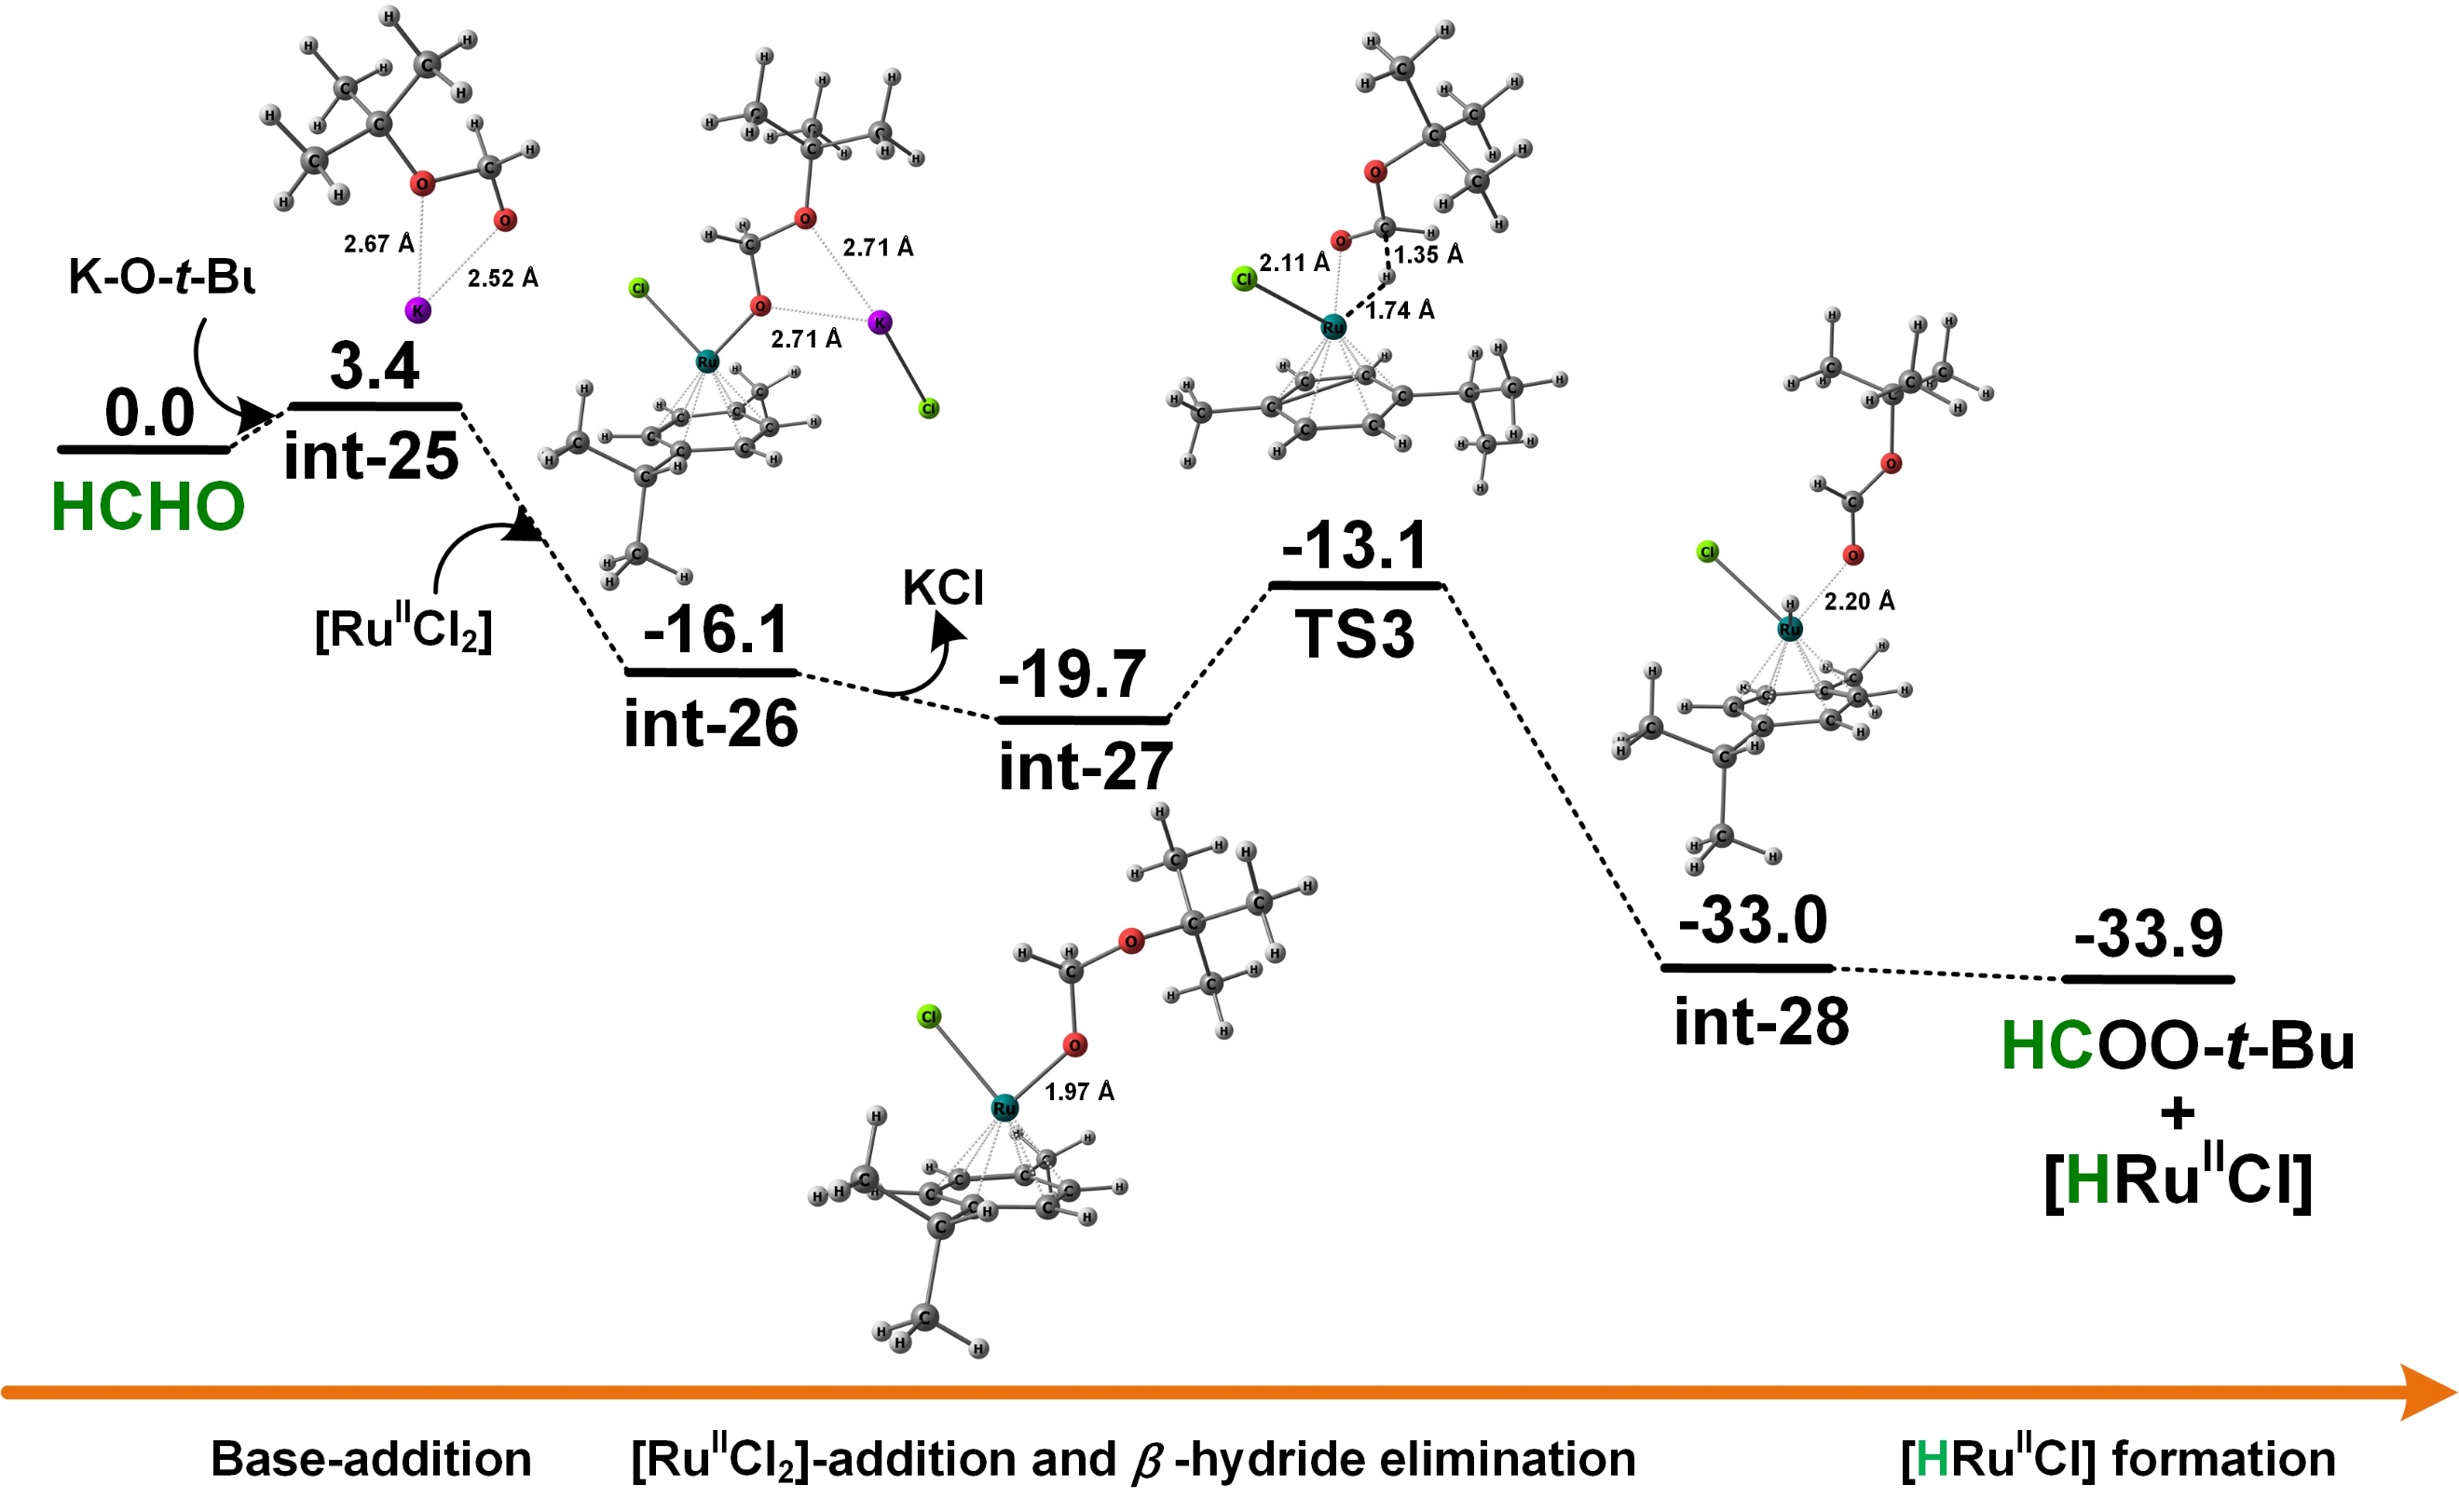
**

**Fig. S11 Potential energy surface for the formation of [RuIIHCl] employing *t*-BuOK as the base (free energies in kcal·mol-1).**

**
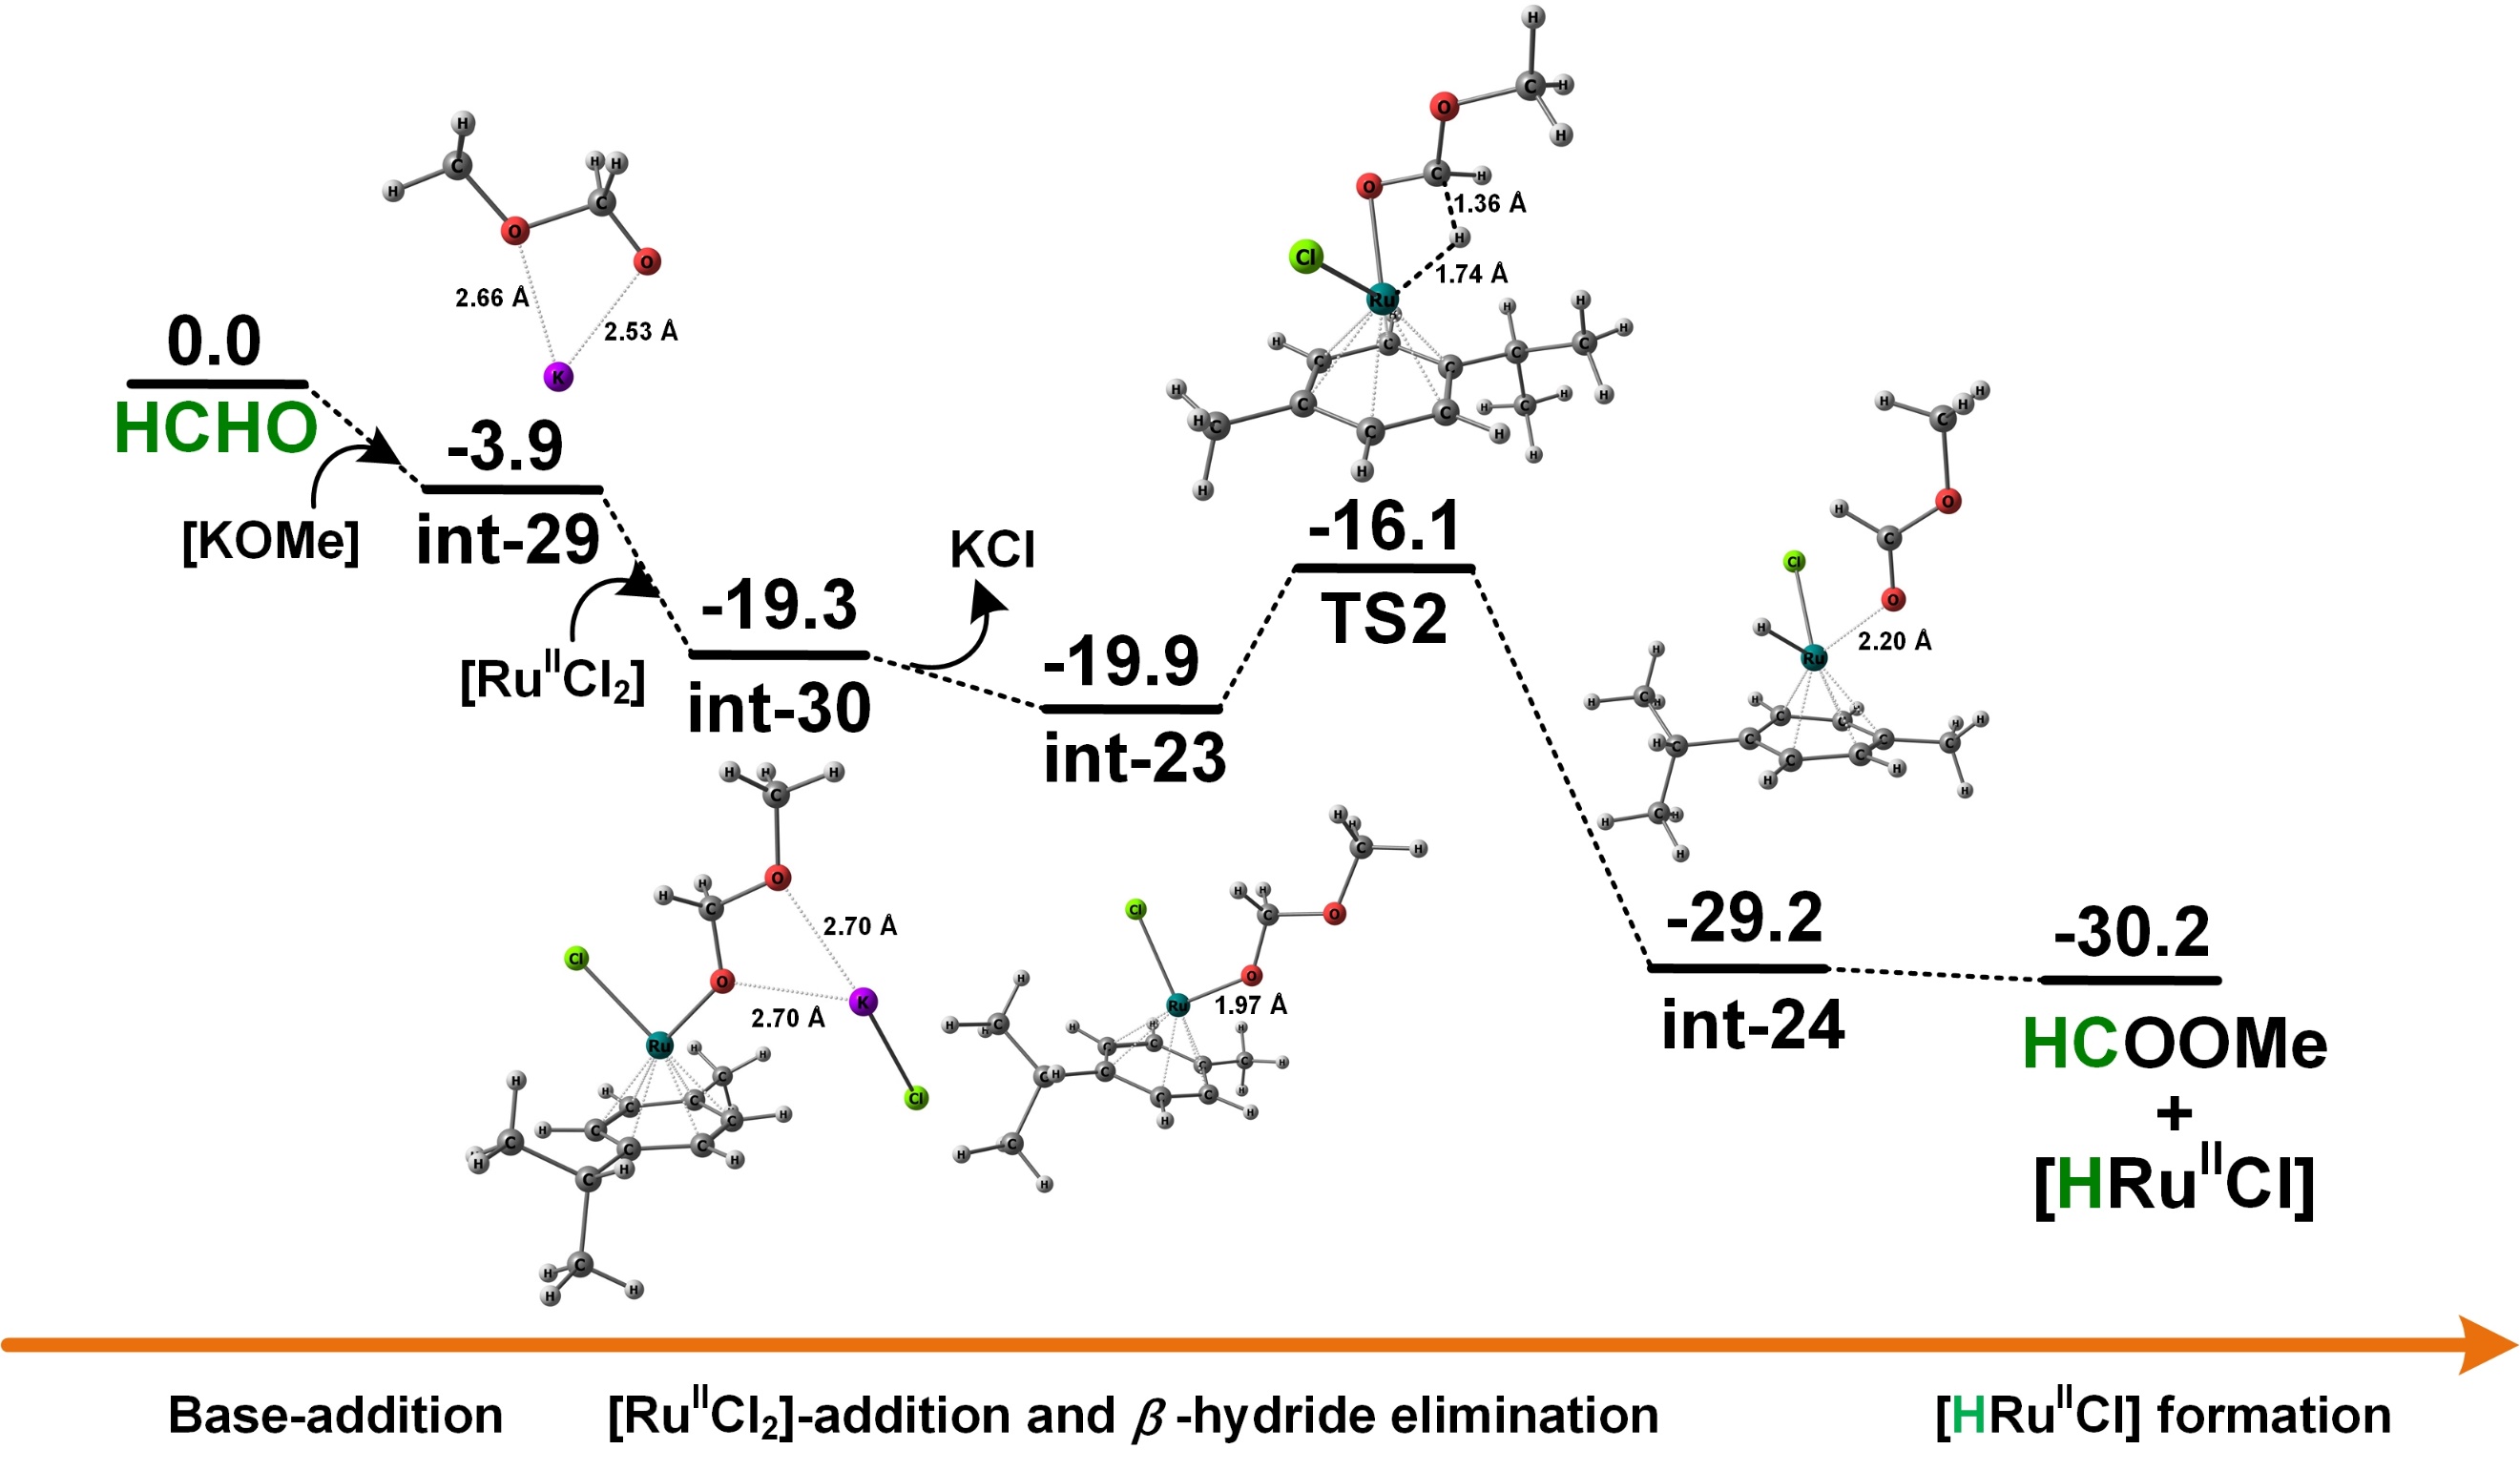
**

**Fig. S12 Potential energy surface for the formation of [RuIIHCl] employing KOMe as the base (free energies in kcal·mol-1).**

To clarify the origin of structural analogies and differences between **C1** and **D1**, the similar reaction, that is, starting form **int-2** and HCHO to form **C1'** has also been explored in details by means of the same DFT calculations. The highest barrier is 21.4 kcal mol-1 (Fig. S13), corresponding to transition state **TS19**, higher than the any barrier of Fig. 8. Thus, theaddition of **int-16** to **B1'** has become the rate-determining step. Compared with **int-16**, the less stereoscopic hindrance of **int-2** is more favorable for the addition of **B1'** to form product **C1** (Fig. 8).

As for the formation of **D1'** (Fig. S14), despite the absence of a methyl unit in **int-6** (*vs.* **int-9**), the associated barrier is significant (Δ*G* = 18.4 kcal mol-1, **TS22**, Fig. S14), higher than any transition states calculated in Fig. 9. Herein, the C1-C5 bond formation, that is, the electron-rich aryl ring attacks the iminium motif has become the rate-determining step. In comparison, the *β*-site of **int-6** is more electrophilic than that of **int-2**, thus favoring the capture of formaldehyde. Moreover, the presence of a methyl substituent at the *β*-site of **int-9** caneffectively stabilize the iminium cation **int-10**, which is favorable to the C1-C5 bond formation.

Based on the calculations, it supports that the formation of **C1'** and **D1'** are not favorable under the same reaction conditions. In a word, the enamine unit in pyridine ring plays a critical role toward the product structures.

**
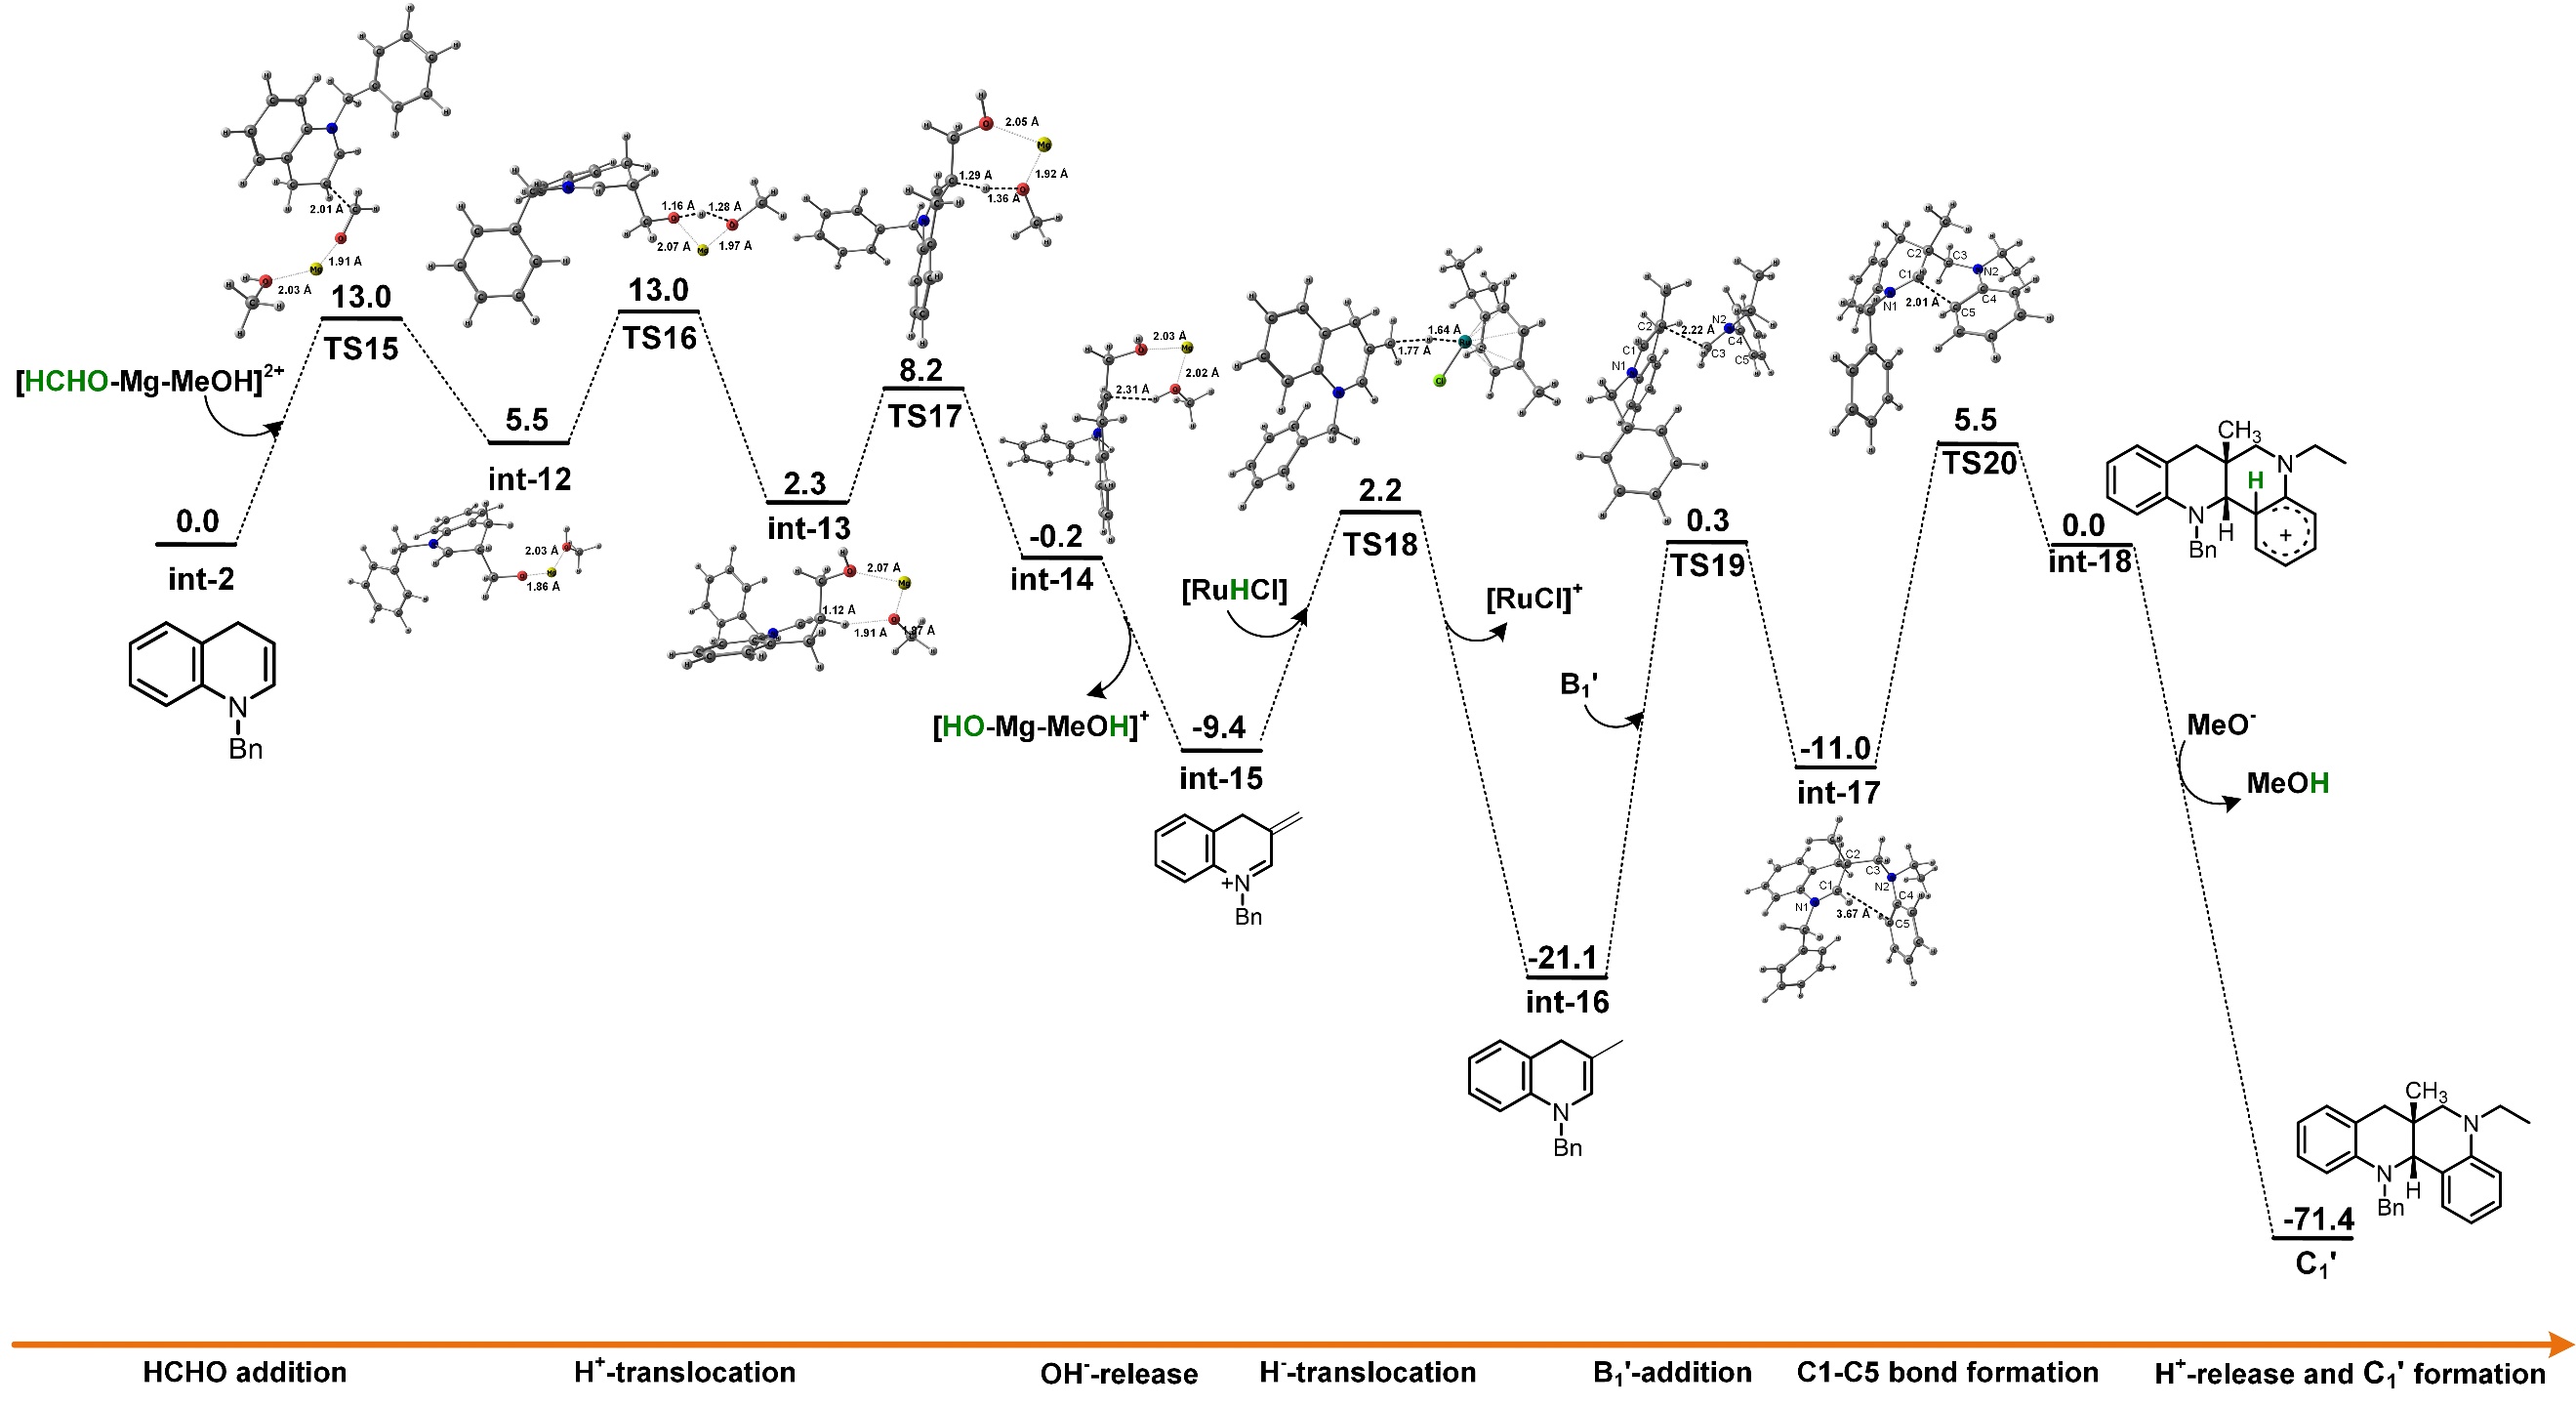
**

**Fig. S13 Potential energy surface for the process of int-2 to C1' (free energies in kcal·mol-1).**

**
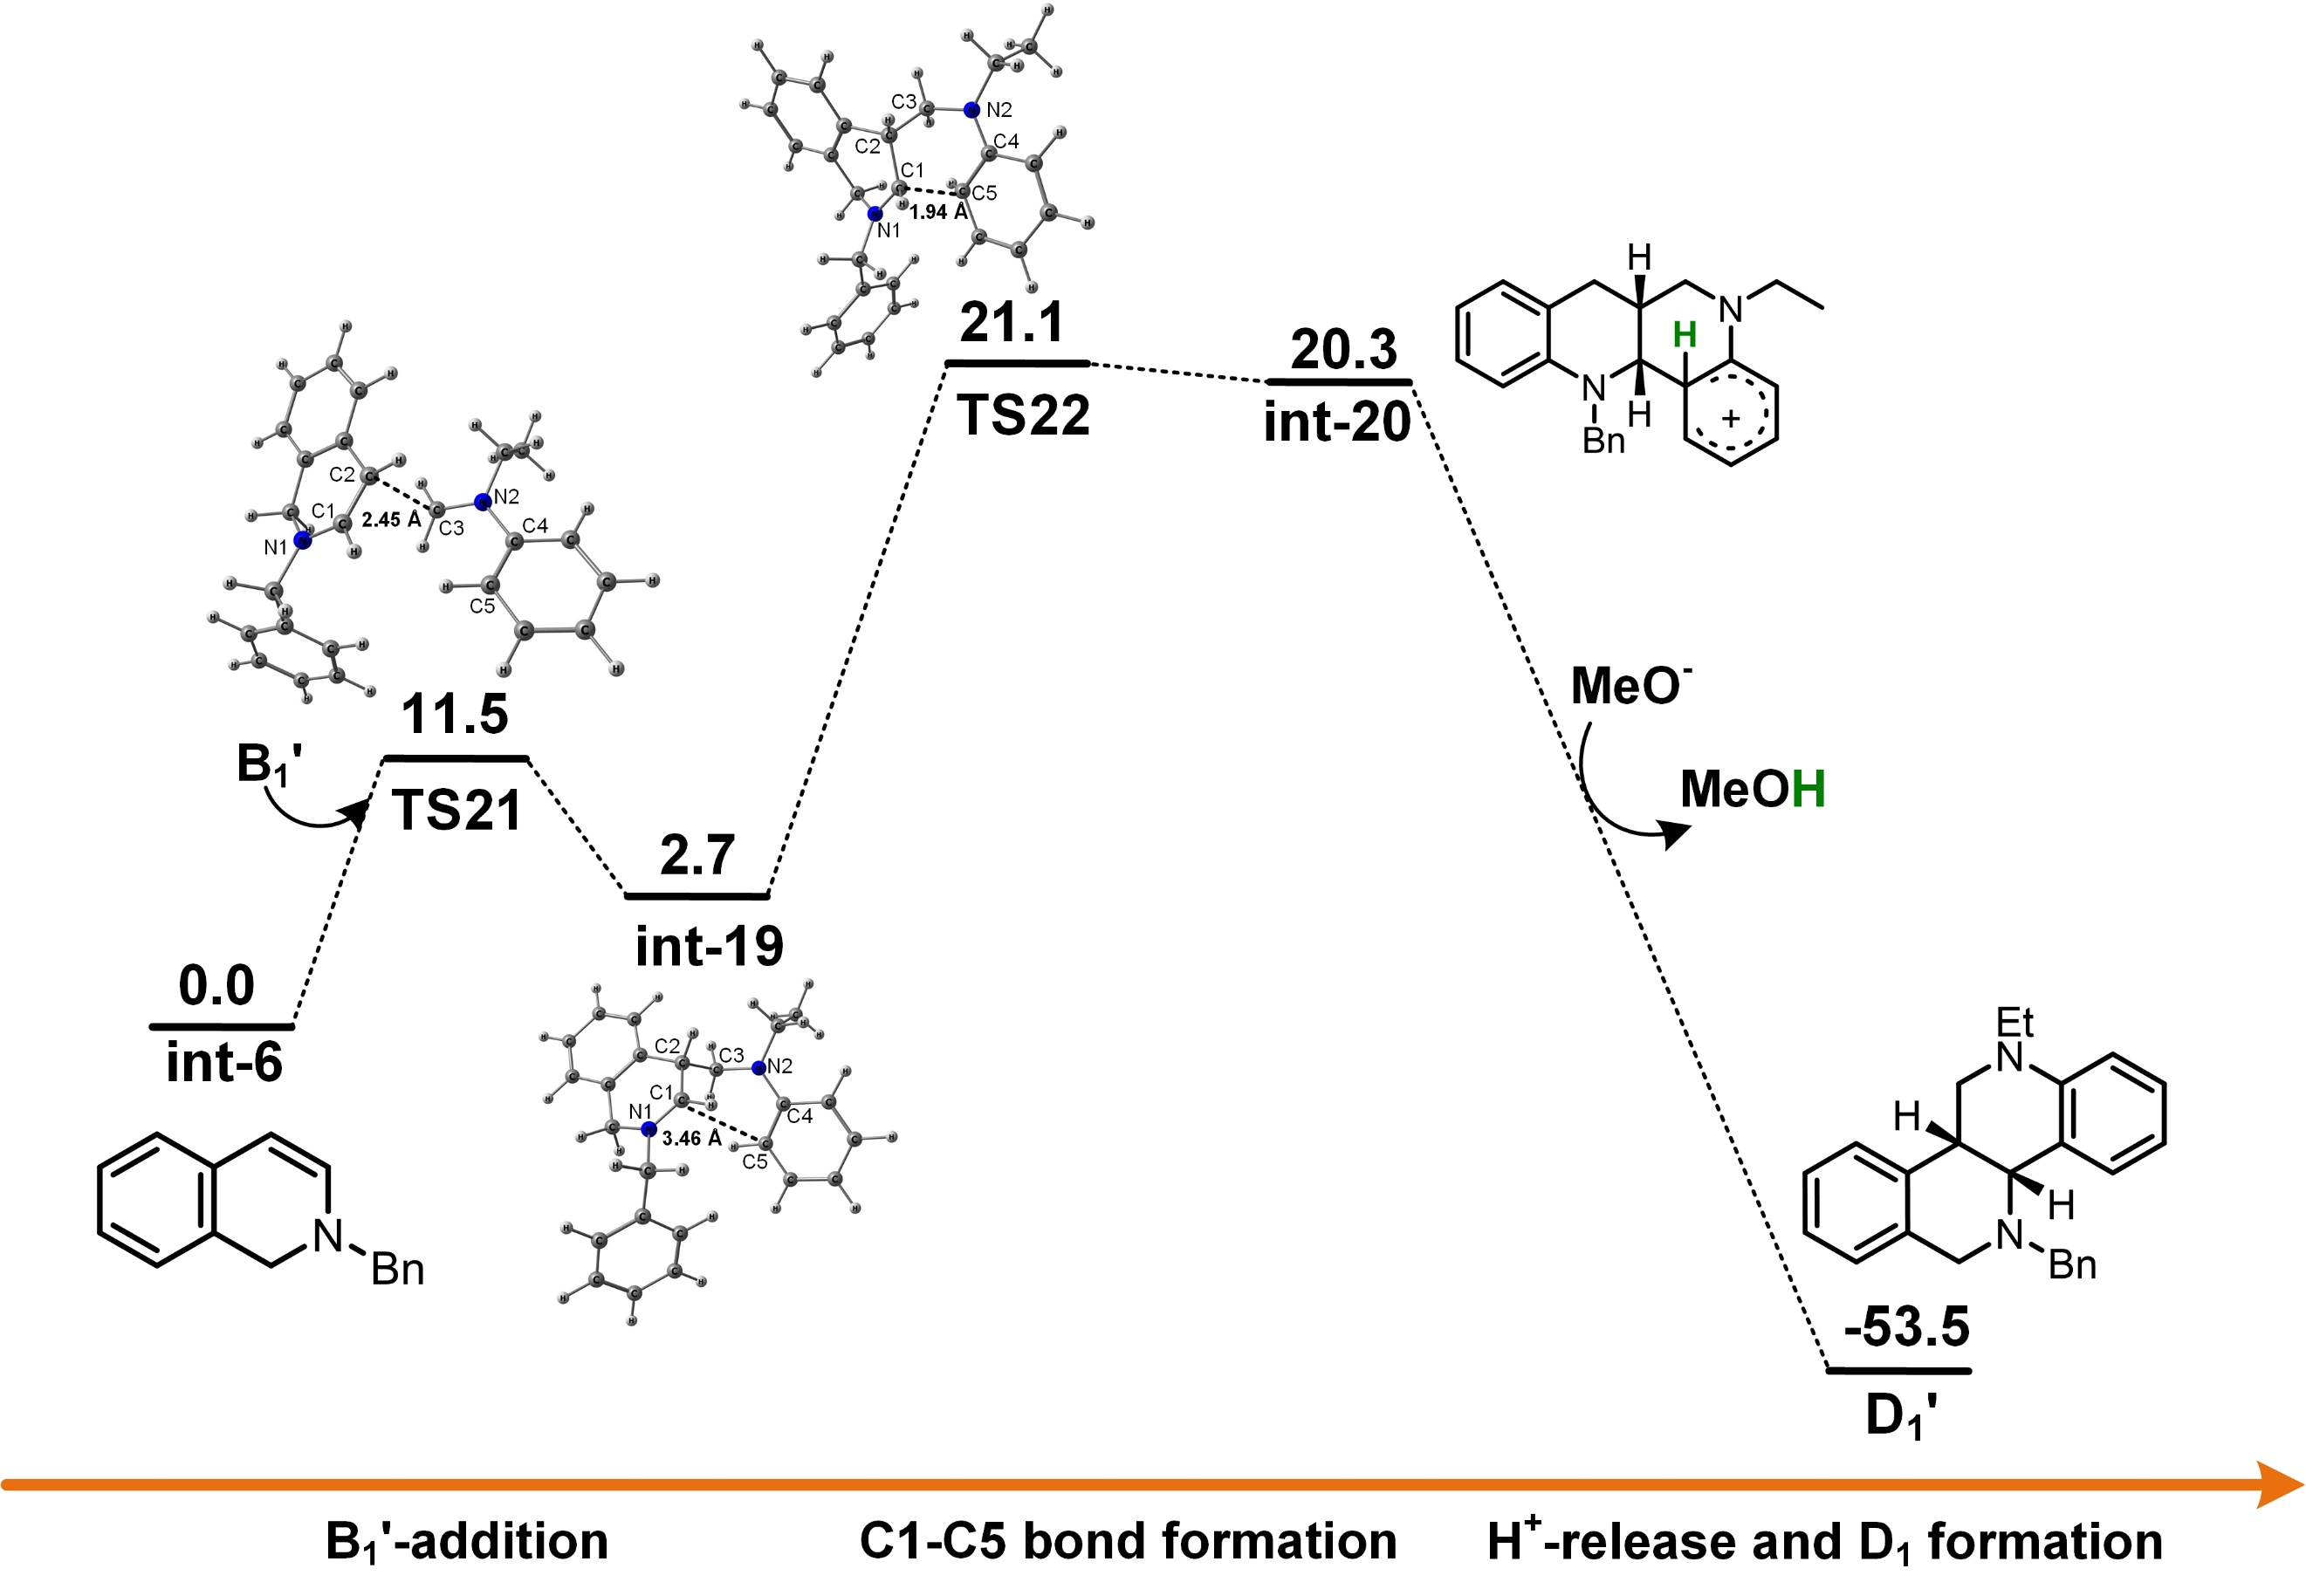
**

**Fig. S14 Potential energy surface for the process of int-6 to D1' (free energies in kcal·mol-1).**

**References**

(1) Tan, Z. D.; Ci, C. G.; Yang, J.; Wu, Y.; Liang Cao, Jiang, H. F.; Zhang, M. *ACS Catal.* **10**, 5243–5249 (2020).

(2) Yang, J.; Zhao, H.; Tan, Z. D.; Cao, L.; Jiang, H. F.; Ci, C. G.; Dixneuf, P. H.; Zhang, M. *ACS Catal. 11*, 9271–9278 (2021).

(3) Frisch, M. J., et al. Gaussian 16; Gaussian, Inc., Wallingford, CT, 2016.

(4) Lee, C.; Yang, C.; Parr, R. G. *Phys. Rev. B: Condens. Matter Mater. Phys*. **1988**, *37*, 785-789.

(5) Becke, A. D. *J. Chem. Phys*. **1993**, *98*, 5648-5652.

(6) Stephens, P. J.; Devlin, F. J.; Chabalowski, C. F.; Frisch, M. J. *J. Phys. Chem*. **1994**, *98*, 11623-11627.

(7) Hay, P. J.; Wadt, W. R. *J. Chem. Phys.* **1985**, *82*, 270-283.

(8) Francl, M. M.; Pietro, W. J.; Hehre, W. J.; Binkley, J. S.; Gordon, M. S.; Defrees, D. J.; Pople, J. A. *J. Chem. Phys*. **1982**, *77*, 3654-3665.

(9) Hehre, W. J.; Ditchfield, R.; Pople, J. A. *J. Chem. Phys*. **1972**, *56*, 2257-2261.

(10) Hariharan, P. C.; Pople, J. A. *Theor. Chim. Acta*. **1973**, *28*, 213-222.

(11) Peng, C. Y.; Schlegel, H. B. *Isr. J. Chem*. **1993**, *33*, 449-454.

(12) Hratchian, H. P.; Schlegel, H. B. *J. Chem. Phys.* **2004**, *120*, 9918-9924.

(13) Cancès, E.; Mennucci, B.; Tomasi, J. *J. Chem. Phys.* **1997**, *107*, 3032-3041.

**Analytic data of the obtained compounds**

(1) (6a-*cis*)-12-benzyl-5-ethyl-5,6,6a,7,12,12a-hexahydrodibenzo[*b,h*][1,6]naphthyridine (**C1**)

Brown solid; m.p. : 110-112 ºC, (64.4 mg, 91% yield); 1H NMR (500 MHz, CDCl3) δ 7.28 – 7.13 (m, 5H), 7.05 (t, *J* = 6.9 Hz, 1H), 6.99 – 6.88 (m, 3H), 6.60 – 6.53 (m, 3H), 6.49 (t, *J* = 7.3 Hz, 1H), 4.92 (d, *J* = 17.2 Hz, 1H), 4.50 (d, *J* = 3.6 Hz, 1H), 4.42 (d, *J* = 17.2 Hz, 1H), 3.47 (dd, *J* = 11.6, 5.0 Hz, 1H), 3.33 (q, *J* = 7.2 Hz, 2H), 3.26 (dd, *J* = 11.6, 6.2 Hz, 1H), 2.86 (dd, *J* = 16.4, 5.4 Hz, 1H), 2.68 (dd, *J* = 16.3, 8.4 Hz, 1H), 2.61 – 2.49 (m, 1H), 1.15 (t, *J* = 5.0 Hz, 3H). 13C NMR (126 MHz, CDCl3) δ 143.8, 143.7, 139.5, 129.6, 128.8, 128.6, 128.5, 127.2, 126.6, 126.6, 121.9, 120.8, 116.4, 115.2, 112.3, 110.2, 58.5, 53.8, 50.5, 44.7, 30.0, 29.7, 11.1. HRMS (ESI): Calcd. for C25H27N2 [M+H]+: 355.2169; found: 355.2172.

(2) (6a-*cis*)-12-benzyl-5-ethyl-7-methyl-5,6,6a,7,12,12a-hexahydrodibenzo[*b*,*h*][1,6]naphthyridine (**C2**)

Yellow solid; m.p. : 146-148 ºC, (52.3 mg, 71% yield); 1H NMR (500 MHz, CDCl3) δ 7.21 – 7.16 (m, 2H), 7.15 – 7.12 (m, 1H), 7.11 – 7.06 (m, 4H), 7.01 – 6.93 (m, 1H), 6.91 (dd, *J* = 7.4, 1.8 Hz, 1H), 6.64 (td, *J* = 7.3, 1.2 Hz, 1H), 6.56 – 6.51 (m, 2H), 6.44 (td, *J* = 7.3, 1.2 Hz, 1H), 4.75 (d, *J* = 17.4 Hz, 1H), 4.50 (d, *J* = 2.8 Hz, 1H), 4.26 (d, *J* = 17.4 Hz, 1H), 3.42 – 3.26 (m, 3H), 3.15 (dd, *J* = 11.3, 5.2 Hz, 1H), 2.79 (dd, *J* = 7.2, 3.0 Hz, 1H), 2.24 – 2.16 (m, 1H), 1.41 (d, *J* = 7.2 Hz, 3H), 1.14 (t, *J* = 5.0 Hz, 3H).13C NMR (126 MHz, CDCl3) δ 144.4, 143.3, 139.9, 131.2, 129.5, 129.4, 128.3, 127.3, 126.4, 126.2, 125.8, 120.8, 116.5, 114.4, 113.0, 110.3, 54.0, 51.1, 48.9, 44.6, 36.7, 33.5, 24.5, 11.2.HRMS (ESI): Calcd. for C26H29N2 [M+H]+: 369.2325; found: 369.2321.

(3) (6a-*cis*)-12-benzyl-5-ethyl-9-methyl-5,6,6a,7,12,12a-hexahydrodibenzo[*b,h*][1,6]naphthyridine (**C3**)

Yellow solid; m.p. : 113-115 ºC, (68.4 mg, 93% yield); 1H NMR (500 MHz, CDCl3) δ 7.19 – 7.11 (m, 4H), 7.09 – 7.03 (m, 1H), 6.97 (t, *J* = 7.8 Hz, 1H), 6.87 (d, *J* = 7.4 Hz, 1H), 6.69 (s, 1H), 6.68 (s, 1H), 6.46 (d, *J* = 8.2 Hz, 1H), 6.42 – 6.36 (m, 2H), 4.79 (d, *J* = 17.0 Hz, 1H), 4.38 (d, *J* = 3.4 Hz, 1H), 4.31 (d, *J* = 17.0 Hz, 1H), 3.37 (dd, *J* = 11.6, 5.0 Hz, 1H), 3.21-3.24 (m, 2H), 3.19 (dd, *J* = 11.4, 6.4 Hz, 1H), 2.77 (dd, *J* = 16.4, 5.4 Hz, 1H), 2.57 (dd, *J* = 16.4, 8.2 Hz, 1H), 2.49 – 2.40 (m, 1H), 2.08 (s, 3H), 1.06 (t, *J* = 5.0 Hz, 3H). 13C NMR (126 MHz, CDCl3) δ 142.7, 140.3, 138.7, 129.2, 127.8, 127.5, 127.3, 126.6, 125.5, 125.4, 124.3, 120.9, 119.7, 114.0, 111.4, 109.1, 57.3, 52.8, 49.4, 43.6, 28.9, 28.5, 19.2, 10.0. HRMS (ESI): Calcd. for C26H29N2 [M+H]+: 369.2325; found: 369.2320.

(4) (6a-*cis*)-12-benzyl-5-ethyl-9-methoxy-5,6,6a,7,12,12a-hexahydrodibenzo[*b,h*][1,6] naphthyrid- ine (**C4**)

Brown solid; m.p. : 129-131 ºC, (49.1 mg, 64% yield); 1H NMR (500 MHz, CDCl3) δ 7.24 (d, *J* = 5.4 Hz, 4H), 7.17 (q, *J* = 5.6, 4.6 Hz, 1H), 7.06 (t, 1H), 6.99 (d, *J* = 7.4 Hz, 1H), 6.59 – 6.51 (m, 4H), 6.48 (t, *J* = 7.4 Hz, 1H), 4.82 (d, *J* = 17.0 Hz, 1H), 4.42 (d, *J* = 3.4 Hz, 1H), 4.38 (d, *J* = 16.8 Hz, 1H), 3.67 (s, 3H), 3.46 (dd, *J* = 11.4, 5.0 Hz, 1H), 3.34 (q, *J* = 7.0, 3.6 Hz, 2H), 3.29 (dd, *J* = 11.6, 6.2 Hz, 1H), 2.87 (dd, *J* = 16.6, 5.6 Hz, 1H), 2.67 (dd, *J* = 16.6, 8.2 Hz, 1H), 2.57 – 2.49 (m, 1H), 1.15 (t, *J* = 5.0 Hz, 3H). 13C NMR (126 MHz, CDCl3) δ 151.2, 143.8, 140.0, 138.1, 128.9, 128.5, 128.4, 126.7, 126.6, 122.5, 121.9, 115.3, 115.1, 114.1, 112.6, 110.1, 58.2, 55.6, 54.7, 50.5, 44.7, 29.7, 29.6, 11.1. HRMS (ESI): Calcd. for C26H29N2O [M+H]+: 385.2274; found: 385.2269.

(5) (6a-*cis*)-12-benzyl-5-ethyl-9-(phenylthio)-5,6,6a,7,12,12a-hexahydrodibenzo[*b,h*][1,6] naphth- yridine (**C5**)

Brown solid; m.p. : 130-132 ºC, (62.8 mg, 68% yield); 1H NMR (500 MHz, CDCl3) δ 7.22 – 7.15 (m, 2H), 7.14 – 7.05 (m, 5H), 7.05 – 6.93 (m, 6H), 6.87 (d, *J* = 7.6 Hz, 1H), 6.51 – 6.41 (m, 3H), 4.87 (d, *J* = 17.2 Hz, 1H), 4.46 (d, *J* = 3.4 Hz, 1H), 4.38 (d, *J* = 17.2 Hz, 1H), 3.42 (dd, *J* = 11.8, 5.0 Hz, 1H), 3.25 (q, *J* = 7.2 Hz, 2H), 3.14 (dd, *J* = 11.6, 5.8 Hz, 1H), 2.72 (dd, *J* = 16.4, 5.2 Hz, 1H), 2.63 – 2.53 (m, 1H), 2.52 – 2.33 (m, 1H), 1.07 (t, *J* = 5.0 Hz, 3H). 13C NMR (126 MHz, CDCl3) δ 143.0, 142.5, 138.9, 137.7, 134.9, 132.9, 127.7, 127.5, 127.5, 126.1, 125.8, 125.4, 124.0, 120.9, 120.3, 116.3, 114.1, 111.8, 109.2, 57.6, 52.8, 49.3, 43.6, 28.7, 28.4, 10.0. HRMS (ESI): Calcd. for C31H31N2S [M+H]+: 463.2202; found: 463.2193.

(6) N-((6a-*cis*)-12-benzyl-5-ethyl-5,6,6a,7,12,12a-hexahydrodibenzo[b,h][1,6]naphthyridin-9-yl)-acetamide (**C6**)

Orange solid; m.p. : 121-123 ºC, (74.8 mg, 91% yield); 1H NMR (500 MHz, CDCl3) δ 7.29 – 7.15 (m, 6H), 7.05 (t, *J* = 7.8 Hz, 1H), 6.92 (t, *J* = 8.6 Hz, 2H), 6.54 (d, *J* = 8.2 Hz, 1H), 6.50 – 6.44 (m, 2H), 4.87 (d, *J* = 17.0 Hz, 1H), 4.46 (d, *J* = 3.4 Hz, 1H), 4.39 (d, *J* = 17.0 Hz, 1H), 3.44 (dd, *J* = 11.6, 5.0 Hz, 1H), 3.32 (q, *J* = 7.2 Hz, 2H), 3.23 (dd, *J* = 11.6, 6.2 Hz, 1H), 2.81 (dd, *J* = 16.6, 5.6 Hz, 1H), 2.64 (dd, *J* = 16.6, 8.4 Hz, 1H), 2.53 – 2.47 (m, 1H), 2.02 (s, 3H), 1.14 (t, *J* = 5.0 Hz, 3H). 13C NMR (126 MHz, CDCl3) δ 168.3, 143.7, 140.9, 139.4, 128.8, 128.6, 128.5, 127.2, 126.7, 126.6, 122.8, 121.7, 121.3, 120.3, 115.1, 112.5, 110.2, 58.4, 54.0, 50.4, 44.6, 29.8, 29.6, 24.2, 11.0. HRMS (ESI): Calcd. for C27H30N3O [M+H]+: 412.2383; found: 412.2375.

(7) (6a-*cis*)-12-benzyl-5-ethyl-10-methyl-5,6,6a,7,12,12a-hexahydrodibenzo[*b,h*][1,6]naphthyrid-ine (**C7**)

Yellow solid; m.p. : 111-113 ºC, (59.6 mg, 81% yield); 1H NMR (500 MHz, CDCl3) δ 7.22 – 7.06 (m, 5H), 6.97 (t, *J* = 7.8 Hz, 1H), 6.86 (d, *J* = 7.6 Hz, 1H), 6.75 (d, *J* = 7.4 Hz, 1H), 6.45 (d, *J* = 8.4 Hz, 1H), 6.40 (t, *J* = 7.5 Hz, 1H), 6.37 – 6.31 (m, 2H), 4.84 (d, *J* = 17.2 Hz, 1H), 4.38 (d, *J* = 3.2 Hz, 1H), 4.33 (d, *J* = 17.0 Hz, 1H), 3.37 (dd, *J* = 11.6, 5.0 Hz, 1H), 3.24 (q, *J* = 7.4 Hz, 2H), 3.17 (dd, *J* = 11.6, 6.0 Hz, 1H), 2.74 (dd, *J* = 16.4, 5.2 Hz, 1H), 2.55 (dd, *J* = 16.4, 8.4 Hz, 1H), 2.47 – 2.37 (m, 1H), 2.08 (s, 3H), 1.06 (t, *J* = 5.0 Hz, 3H). 13C NMR (126 MHz, CDCl3) δ 142.7, 142.5, 138.5, 135.6, 128.4, 127.7, 127.4, 127.3, 125.5, 125.5, 120.8, 116.8, 116.2, 114.0, 111.8, 109.0, 57.2, 52.6, 49.4, 43.5, 29.0, 28.3, 20.6, 10.0. HRMS (ESI): Calcd. for C26H29N2 [M+H]+: 369.2325; found: 369.2315.

(8) (6a-*cis*)-12-benzyl-8-bromo-5-ethyl-5,6,6a,7,12,12a-hexahydrodibenzo[*b,h*][1,6] naphthyridi-ne (**C8**)

Brown solid; m.p. : 125-127 ºC, (34.64 mg, 40% yield); 1H NMR (400 MHz, CDCl3) δ 7.40 – 7.26 (m, 5H), 7.20 – 7.09 (m, 1H), 7.01 (d, *J* = 7.4 Hz, 1H), 6.95 – 6.85 (m, 2H), 6.69 – 6.55 (m, 3H), 5.03 (d, *J* = 17.2 Hz, 1H), 4.60 (d, *J* = 3.4 Hz, 1H), 4.55 (d, *J* = 17.2 Hz, 1H), 3.62 (dd, *J* = 11.6, 4.8 Hz, 1H), 3.44 (q, *J* = 7.2 Hz, 2H), 3.36 (dd, *J* = 11.8, 5.4 Hz, 1H), 3.03 (dd, *J* = 16.8, 5.4 Hz, 1H), 2.72 (dd, *J* = 16.8, 9.0 Hz, 1H), 2.68 – 2.58 (m, 1H), 1.26 (t, *J* = 5.0 Hz, 3H). 13C NMR (126 MHz, CDCl3) δ 144.0, 142.6, 137.8, 127.7, 127.5, 127.3, 126.8, 125.8, 125.4, 125.0, 120.2, 119.4, 114.2, 110.3, 109.3, 57.3, 53.5, 49.5, 43.6, 29.3, 28.8, 10.0. HRMS (ESI): Calcd. for C25H26BrN2 [M+H]+: 433.1274; found: 433.1268.

(9) (6a-*cis*)-12-benzyl-9-bromo-5-ethyl-5,6,6a,7,12,12a-hexahydrodibenzo[*b,h*][1,6]naphthyridine (**C9**)

Brown solid; m.p. : 139-141 ºC, (38.1 mg, 44% yield); 1H NMR (500 MHz, CDCl3) δ 7.28 – 7.22 (m, 2H), 7.21 – 7.16 (m, 3H), 7.10 – 7.05 (m, 1H), 7.04 – 6.98 (m, 2H), 6.92 (dd, *J* = 7.5, 1.6 Hz, 1H), 6.56 (d, *J* = 8.2 Hz, 1H), 6.50 (t, *J* = 7.4 Hz, 1H), 6.42 (d, *J* = 8.6 Hz, 1H), 4.89 (d, *J* = 17.2 Hz, 1H), 4.50 (d, *J* = 3.6 Hz, 1H), 4.42 (d, *J* = 17.2 Hz, 1H), 3.50 (dd, *J* = 11.2, 5.0 Hz, 1H), 3.33 (q, *J* = 7.0 Hz, 2H), 3.23 (dd, *J* = 11.6, 5.8 Hz, 1H), 2.81 (dd, *J* = 16.6, 5.4 Hz, 1H), 2.66 (dd, *J* = 16.6, 8.8 Hz, 1H), 2.57 – 2.50 (m, 1H), 1.16 (t, *J* = 5.0, 3H). 13C NMR (126 MHz, CDCl3) δ 143.6, 142.6, 138.8, 131.9, 129.8, 128.7, 128.6, 128.5, 126.8, 126.4, 123.1, 121.3, 115.2, 113.8, 110.3, 108.1, 58.5, 54.0, 50.3, 44.6, 29.7, 29.4, 11.0. HRMS (ESI): Calcd. for C25H26BrN2 [M+H]+: 433.1274; found: 433.1269.

(10) (6a-*cis*)-12-benzyl-9-chloro-5-ethyl-5,6,6a,7,12,12a-hexahydrodibenzo[*b,h*][1,6]naphthyridi-ne (**C10**)

Yellow solid; m.p. : 138-140 ºC, (31.0 mg, 40% yield); 1H NMR (500 MHz, CDCl3) δ 7.22 – 7.16 (m, 2H), 7.14 – 7.09 (m, 3H), 7.00 – 6.89 (m, 1H), 6.87 – 6.79 (m, 3H), 6.51 – 6.47 (m, 1H), 6.46 – 6.35 (m, 2H), 4.83 (d, *J* = 17.2 Hz, 1H), 4.43 (d, *J* = 3.6 Hz, 1H), 4.36 (d, *J* = 17.2 Hz, 1H), 3.43 (dd, *J* = 11.6, 5.0 Hz, 1H), 3.27 (q, *J* = 7.0 Hz, 2H), 3.16 (dd, *J* = 11.6, 5.8 Hz, 1H), 2.74 (dd, *J* = 16.6, 5.4 Hz, 1H), 2.59 (dd, *J* = 16.6, 8.8 Hz, 1H), 2.51 – 2.38 (m, 1H), 1.08 (t, *J* = 5.0 Hz, 3H). 13C NMR (126 MHz, CDCl3) δ 143.6, 142.1, 138.9, 129.1, 128.7, 128.6, 126.9, 126.8, 126.5, 122.6, 121.4, 120.9, 115.2, 113.4, 110.3, 58.5, 54.1, 50.4, 44.6, 29.7, 29.4, 11.0. HRMS (ESI): Calcd. for C25H26ClN2 [M+H]+: 389.1779; found: 389.1772.

(11) (6a-*cis*)-12-benzyl-5-ethyl-9-fluoro-5,6,6a,7,12,12a-hexahydrodibenzo[*b,h*][1,6]naphthyridine (**C11**)

Brown solid; m.p. : 81-83 ºC, (46.2 mg, 62% yield); 1H NMR (500 MHz, CDCl3) δ 7.32 – 7.16 (m, 5H), 7.07 (t, *J* = 8.0 Hz, 1H), 6.96 (d, *J* = 7.6 Hz, 1H), 6.66 (d, *J* = 8.6 Hz, 2H), 6.55 (d, *J* = 8.4 Hz, 1H), 6.52 – 6.41 (m, 2H), 4.87 (d, *J* = 17.0 Hz, 1H), 4.47 (d, *J* = 3.2 Hz, 1H), 4.42 (d, *J* = 17.0 Hz, 1H), 3.50 (dd, *J* = 11.8, 4.8 Hz, 1H), 3.35 (q, *J* = 7.2 Hz, 2H), 3.26 (dd, *J* = 11.6, 5.8 Hz, 1H), 2.83 (dd, *J* = 16.8, 5.4 Hz, 1H), 2.67 (dd, *J* = 16.8, 8.6 Hz, 1H), 2.59 – 2.49 (m, 1H), 1.11 (t, *J* = 5.0 Hz, 3H). 13C NMR (126 MHz, CDCl3) δ 156.0, 154.2, 143.7, 140.0, 139.4, 128.7, 128.5, 127.7 (d, *J* = 237.0 Hz), 126.6, 122.5 (d, *J* = 6.4 Hz), 121.6, 115.8 (d, *J* = 22.68 Hz), 115.2, 113.4 (d, *J* = 21.42 Hz), 113.4 (d, *J* = 7.56 Hz), 110.2, 58.4, 54.7, 50.5, 44.7, 29.6, 29.5, 11.1. 19F NMR (471 MHz, CDCl3) δ -129.45(s). HRMS (ESI): Calcd. for C25H26FN2 [M+H]+: 373.2075; found: 373.2068.

(12) methyl((6a-*cis*)-12-benzyl-5-ethyl-5,6,6a,7,12,12a-hexahydrodibenzo[*b*,*h*][1,6]naphthyridin-e)-9-carboxylate (**C12**)

Yellow solid; m.p. : 151-153 ºC, (49.4 mg, 60% yield); 1H NMR (500 MHz, CDCl3) δ 7.66 (s, 1H), 7.64 (s, 1H), 7.30 – 7.14 (m, 5H), 7.08 (t, *J* = 7.8 Hz, 1H), 6.91 (d, *J* = 7.6 Hz, 1H), 6.56 (d, *J* = 9.4 Hz, 2H), 6.53 – 6.50 (m, 1H), 5.02 (d, *J* = 17.2 Hz, 1H), 4.58 (d, *J* = 4.6 Hz, 1H), 4.51 (d, *J* = 17.2 Hz, 1H), 3.80 (s, 3H), 3.52 (dd, *J* = 12.0, 5.0 Hz, 1H), 3.34 – 3.30 (m, 2H), 3.22 (dd, *J* = 11.8, 5.8 Hz, 1H), 2.87 (dd, *J* = 16.4, 5.2 Hz, 1H), 2.72 (dd, *J* = 16.4, 9.0 Hz, 1H), 2.60 – 2.51 (m, 1H), 1.16 (t, *J* = 5.0 Hz, 3H). 13C NMR (126 MHz, CDCl3) δ 167.4, 147.5, 143.6, 138.1, 131.3, 129.5, 128.9, 128.7, 128.4, 127.0, 126.4, 121.0, 120.1, 117.4, 115.3, 111.0, 110.4, 58.8, 53.7, 51.5, 50.2, 44.6, 29.7, 29.5, 11.0. HRMS (ESI): Calcd. for C27H29N2O2 [M+H]+: 413.2224; found: 413.2216.

(13) (6a-*cis*)-5-ethyl-12-(3-methoxybenzyl)-5,6,6a,7,12,12a-hexahydrodibenzo[*b*,*h*][1,6]naphthy-ridine (**C13**)

Black solid; m.p. : 79-81 ºC, (72.3 mg, 94% yield); 1H NMR (500 MHz, CDCl3) δ 7.19 – 7.12 (m, 1H), 7.06 (t, *J* = 7.8 Hz, 1H), 6.98 – 6.88 (m, 3H), 6.81 (d, *J* = 7.6 Hz, 1H), 6.76 (s, 1H), 6.71 (d, *J* = 8.2 Hz, 1H), 6.59 – 6.52 (m, 3H), 6.49 (t, *J* = 7.3 Hz, 1H), 4.88 (d, *J* = 17.2 Hz, 1H), 4.49 (d, *J* = 3.4 Hz, 1H), 4.40 (d, *J* = 17.2 Hz, 1H), 3.71 (s, 3H), 3.47 (dd, *J* = 11.6, 5.0 Hz, 1H), 3.32 (q, *J* = 7.6 Hz, 2H), 3.25 (dd, *J* = 11.6, 6.2 Hz, 1H), 2.85 (dd, *J* = 16.4, 5.4 Hz, 1H), 2.67 (dd, *J* = 16.4, 8.4 Hz, 1H), 2.58 – 2.49 (m, 1H), 1.15 (t, *J* = 5.0 Hz, 3H). 13C NMR (126 MHz, CDCl3) δ 159.9, 143.8, 143.7, 141.4, 129.6, 129.5, 128.8, 128.6, 127.2, 121.9, 120.9, 118.9, 116.44, 115.2, 112.4, 112.4, 111.8, 110.2, 58.5, 55.2, 53.9, 50.5, 44.7, 30.0, 29.7, 11.1. HRMS (ESI): Calcd. for C26H29N2O [M+H]+: 385.2274; found: 385.2266.

(14) (6a-*cis*)-5-ethyl-9-methyl-12-(4-(trifluoromethyl)benzyl)-5,6,6a,7,12,12a-hexahydrodibenzo[*b,h*][1,6]naphthyridine (**C14**)

White solid; m.p. : 112-114 ºC, (83.7 mg, 96% yield); 1H NMR (500 MHz, CDCl3) δ 7.38 (d, *J* = 8.0 Hz, 2H), 7.19 (d, *J* = 8.0 Hz, 2H), 6.97 (m, 1H), 6.84 (d, *J* = 7.4 Hz, 1H), 6.76 – 6.66 (m, 2H), 6.46 (d, *J* = 8.4 Hz, 1H), 6.39 (t, *J* = 7.4 Hz, 1H), 6.29 (d, *J* = 8.2 Hz, 1H), 4.77 (d, *J* = 17.4 Hz, 1H), 4.35 (d, *J* = 3.0 Hz, 1H), 4.30 (d, *J* = 17.4 Hz, 1H), 3.36 – 3.19 (m, 4H), 2.88 (dd, *J* = 16.6, 5.6 Hz, 1H), 2.58 (dd, *J* = 16.6, 6.8 Hz, 1H), 2.49 – 2.43 (m, 1H), 2.09 (s, 3H), 1.07 (t, *J* = 5.0 Hz, 3H). 13C NMR (126 MHz, CDCl3) δ 144.5, 143.9, 141.3, 130.5, 129.4, 129.0, 128.8 (q, *J* = 32.76 Hz), 127.9, 126.8, 126.0, 125.4 (q, *J* = 3.78 Hz), 124.4 (q, *J* = 272.16 Hz), 121.5, 120.9, 115.0, 112.5, 110.3, 58.6, 53.1, 50.0, 44.6, 30.2, 29.8, 20.3, 11.1. 19F NMR (471 MHz, CDCl3) δ -62.19. HRMS (ESI): Calcd. for C27H28F3N2 [M+H]+: 437.2199; found: 437.2194.

(15) (6a-*cis*)-5-ethyl-12-((perfluorophenyl)methyl)-5,6,6a,7,12,12a-hexahydrodibenzo[*b,h*][1,6] naphthyridine (**C15**)

Black solid; m.p. : 56-58 ºC, (55.9 mg, 63% yield); 1H NMR (500 MHz, CDCl3) δ 7.04 (q, *J* = 7.5 Hz, 2H), 6.91 (t, *J* = 7.9 Hz, 2H), 6.79 (d, *J* = 8.3 Hz, 1H), 6.71 – 6.60 (m, 1H), 6.54 – 6.45 (m, 2H), 5.05 (d, *J* = 16.0 Hz, 1H), 4.59 (d, *J* = 3.8 Hz, 1H), 4.51 (d, *J* = 16.0 Hz, 1H), 3.65 (dd, *J* = 11.8, 4.4 Hz, 1H), 3.39 – 3.26 (m, 2H), 3.18 (dd, *J* = 11.8, 4.0 Hz, 1H), 2.74 – 2.60 (m, 2H), 2.53 – 2.44 (m, 1H), 1.16 (t, *J* = 5.0 Hz, 3H). 13C NMR (126 MHz, CDCl3) δ 146.5-144.5 (m), 143.5, 142.1, 141.4-136.4 (m), 129.9, 128.4, 127.6, 127.0, 122.5, 121.4, 117.7, 115.3, 112.9-112.7 (m), 112.4, 109.9, 59.2, 51.1, 45.0, 44.7, 28.5, 28.3, 10.9. 19F NMR (471 MHz, CDCl3) δ -142.4 (dd, *J* = 23.6, 8.0 Hz), -155.5 (t, *J* = 20.9 Hz), -162.1 (td, *J* = 22.2, 8.4 Hz). HRMS (ESI): Calcd. for C25H22F5N2 [M+H]+: 445.1698; found: 445.1688.

(16) (6a-*cis*)-5-ethyl-12-phenethyl-5,6,6a,7,12,12a-hexahydrodibenzo[*b*,*h*][1,6]naphthyridine (**C16**)

Black oil; (62.6 mg, 85% yield); 1H NMR (500 MHz, CDCl3) δ 7.22 – 7.15 (m, 2H), 7.12 – 7.07 (m, 1H), 7.06 – 6.97 (m, 4H), 6.90 (d, *J* = 7.6 Hz, 1H), 6.84 (d, *J* = 7.4 Hz, 1H), 6.71 (d, *J* = 8.4 Hz, 1H), 6.54 – 6.41 (m, 3H), 4.16 (d, *J* = 3.6 Hz, 1H), 3.92 – 3.80 (m, 1H), 3.34 (dd, *J* = 15.6, 8.0 Hz, 1H), 3.28 (dd, *J* = 12.3, 5.6 Hz, 1H), 3.22 (q, *J* = 7.2 Hz, 2H), 3.06 (dd, *J* = 11.6, 5.8 Hz, 1H), 2.85 – 2.76 (m, 1H), 2.71 – 2.61 (m, 2H), 2.52 (dd, *J* = 16.3, 8.8 Hz, 1H), 2.23 – 2.16 (m, 1H), 1.04 (t, *J* = 5.0 Hz, 3H). 13C NMR (126 MHz, CDCl3) δ 143.6, 142.9, 139.8, 129.8, 129.0, 128.7, 128.6, 128.5, 127.3, 126.2, 122.1, 121.0, 115.8, 115.2, 111.1, 110.1, 58.4, 52.3, 50.4, 44.7, 33.7, 29.6, 29.4, 11.0. HRMS (ESI): Calcd. for C26H29N2 [M+H]+: 369.2320; found: 369.2320.

(17) (6a-*cis*)-5-ethyl-12-(4-nitrophenethyl)-5,6,6a,7,12,12a-hexahydrodibenzo[*b*,*h*][1,6]naphthyr- idine (**C17**)

Brown solid; m.p. : 105-107 ºC, (67.7 mg, 82% yield); 1H NMR (500 MHz, CDCl3) δ 8.10 (d, *J* = 8.2 Hz, 2H), 7.25 – 7.17 (m, 2H), 7.12 (t, *J* = 8.1 Hz, 2H), 7.01 – 6.91 (m, 2H), 6.72 (d, *J* = 8.4 Hz, 1H), 6.62 (t, *J* = 7.6 Hz, 1H), 6.59 – 6.52 (m, 2H), 4.21 (d, *J* = 3.4 Hz, 1H), 3.90 (t, *J* = 12.4 Hz, 1H), 3.41 (dt, *J* = 15.8, 8.4 Hz, 1H), 3.35 – 3.26 (m, 3H), 3.17 (dd, *J* = 12.0, 7.0 Hz, 1H), 3.02 – 2.92 (m, 1H), 2.84 (dd, *J* = 16.6, 5.2 Hz, 1H), 2.78 – 2.69 (m, 1H), 2.61 (dd, *J* = 16.5, 7.8 Hz, 1H), 2.33 – 2.26 (m, 1H), 1.12 (t, *J* = 5.0 Hz, 3H). 13C NMR (126 MHz, CDCl3) δ 147.7, 146.6, 143.8, 142.7, 130.0, 129.8, 129.0, 129.0, 127.4, 123.7, 121.5, 121.0, 116.4, 115.0, 111.1, 110.3, 58.5, 51.4, 49.9, 44.6, 33.9, 29.7, 29.6, 11.0. HRMS (ESI): Calcd. for C26H28N3O2 [M+H]+: 414.2176; found: 414.2167.

(18) (6a-*cis*)-5-ethyl-12-(3-methylbut-2-en-1-yl)-5,6,6a,7,12,12a-hexahydrodibenzo[*b*,*h*][1,6]nap-hthyridine (**C18**)

Black oil; (47.1 mg, 71% yield); 1H NMR (500 MHz, CDCl3) δ 7.04 – 6.90 (m, 3H), 6.83 (d, *J* = 7.4 Hz, 1H), 6.58 (d, *J* = 8.4 Hz, 1H), 6.54 – 6.40 (m, 3H), 5.20 – 5.10 (m, 1H), 4.32 (d, *J* = 3.6 Hz, 1H), 4.15 (dd, *J* = 16.8, 5.6 Hz, 1H), 3.74 (dd, *J* = 16.7, 6.4 Hz, 1H), 3.40 (dd, *J* = 11.6, 4.8 Hz, 1H), 3.25 (q, *J* = 7.2 Hz, 2H), 3.13 (dd, *J* = 11.5, 5.9 Hz, 1H), 2.70 (dd, *J* = 16.5, 5.5 Hz, 1H), 2.55 (dd, *J* = 16.5, 9.0 Hz, 1H), 2.34 – 2.29 (m, 1H), 1.61 (s, 3H), 1.56 (s, 3H), 1.07 (t, *J* = 7.0 Hz, 3H). 13C NMR (126 MHz, CDCl3) δ 142.6, 142.5, 132.9, 128.5, 128.0, 127.3, 126.0, 121.3, 120.7, 120.3, 114.9, 114.1, 111.1, 109.0, 56.4, 49.4, 47.1, 43.6, 28.6, 28.5, 24.7, 17.0, 9.9. HRMS (ESI): Calcd. for C23H29N2 [M+H]+: 333.2325; found: 333.2317.

(19) Benzyl 2-((6a-*cis*)-5-ethyl-5,6a,7,12a-tetrahydrodibenzo[b,h][1,6]naphthyridin-12(6H)-yl)a-cetate (**C19**)

Yellow solid; m.p. : 67-69 ºC, (18.2 mg, 22% yield); 1H NMR (500 MHz, CDCl3) δ 7.34 – 7.29 (m, 3H), 7.28 – 7.22 (m, 2H), 7.12 (t, *J* = 7.8 Hz, 1H), 7.03 (t, *J* = 8.0 Hz, 1H), 6.99 (d, *J* = 7.4 Hz, 1H), 6.93 (d, *J* = 7.4 Hz, 1H), 6.90 – 6.72 (m, 1H), 6.59 (d, *J* = 8.4 Hz, 1H), 6.50 – 6.45 (m, 2H), 5.13 (s, 2H), 4.52 (d, *J* = 3.8 Hz, 1H), 4.20 (d, *J* = 18.4 Hz, 1H), 3.88 (d, *J* = 18.4 Hz, 1H), 3.33 – 3.25 (m, 3H), 3.21 (dd, *J* = 11.4, 5.2 Hz, 1H), 3.08 (dd, *J* = 16.6, 5.8 Hz, 1H), 2.65 (dd, *J* = 16.6, 4.8 Hz, 1H), 2.54 – 2.46 (m, 1H), 1.10 (t, *J* = 7.1 Hz, 3H). 13C NMR (126 MHz, CDCl3) δ 171.6, 144.0, 143.3, 135.9, 130.3, 129.8, 129.3, 128.6, 128.2, 128.2, 127.3, 121.1, 120.7, 117.4, 114.8, 111.5, 110.6, 66.5, 57.6, 49.6, 49.0, 44.7, 30.0, 29.8, 11.0. HRMS (ESI): Calcd. for C27H29N2O2 [M+H]+: 413.2224; found: 413.2214.

(20) (6a-*cis*)-5-ethyl-12-hexyl-5,6,6a,7,12,12a-hexahydrodibenzo[b,h][1,6]naphthyridine (**C20**)

Black oil; (40.4 mg, 58% yield); 1H NMR (500 MHz, CDCl3) δ 7.04 – 6.95 (m, 2H), 6.90 (d, *J* = 7.6 Hz, 1H), 6.81 (d, *J* = 7.4 Hz, 1H), 6.61 (d, *J* = 8.4 Hz, 1H), 6.50 – 6.38 (m, 3H), 4.31 (d, *J* = 4.0 Hz, 1H), 3.69 – 3.54 (m, 1H), 3.48 (dd, *J* = 11.6, 4.6 Hz, 1H), 3.26 (p, *J* = 7.1 Hz, 2H), 3.13 – 3.04 (m, 2H), 2.63 (dd, *J* = 16.4, 5.2 Hz, 1H), 2.54 (dd, *J* = 16.4, 9.4 Hz, 1H), 2.36 – 2.27 (m, 1H), 1.57 – 1.45 (m, 2H), 1.24 – 1.15 (m, 6H), 1.08 (t, *J* = 7.1 Hz, 3H), 0.81 (t, *J* = 5.8 Hz, 3H). 13C NMR (126 MHz, CDCl3) δ 143.6, 143.3, 129.6, 128.4, 128.3, 127.1, 122.5, 121.0, 115.5, 115.3, 111.3, 110.1, 58.3, 51.0, 50.9, 44.7, 31.7, 29.5, 29.4, 27.1, 26.8, 22.7, 14.1, 11.0. HRMS (ESI): Calcd. for C24H33N2 [M+H]+: 349.2638; found: 349.2634.

(21) 1-((6a-*cis*)-5-ethyl-5,6a,7,12a-tetrahydrodibenzo[b,h][1,6]naphthyridin-12(6H)-yl)-5-((6a-*cis*)-5-ethyl-5,6a,7,12a-tetrahydrodibenzo[b,h][1,6]naphthyridin-12(6H)-yl)pentane (**C21**)

Brown solid, m.p. : 67-69 ºC (84.6 mg, 71% yield); 1H NMR (500 MHz, CDCl3) δ 7.05 (q, *J* = 7.2 Hz, 4H), 6.95 (d, *J* = 7.6 Hz, 2H), 6.88 (d, *J* = 7.4 Hz, 2H), 6.65 (d, *J* = 8.4 Hz, 2H), 6.58 – 6.45 (m, 6H), 4.34 (d, *J* = 3.4 Hz, 2H), 3.75 – 3.63 (m, 2H), 3.52 (td, *J* = 11.7, 4.6 Hz, 2H), 3.39 – 3.25 (m, 4H), 3.14 (dq, *J* = 14.6, 8.0, 7.2 Hz, 4H), 2.74 – 2.66 (m, 2H), 2.60 (dd, *J* = 16.4, 9.6 Hz, 2H), 2.43 – 2.30 (m, 2H), 1.66 – 1.53 (m, 4H), 1.35 – 1.23 (m, 2H), 1.20 – 1.08 (m, 6H). 13C NMR (126 MHz, CDCl3) δ 143.6, 143.2, 129.7, 128.3, 128.3, 127.1, 122.4, 121.0, 115.6, 115.2, 111.3, 110.1, 58.3, 50.8, 44.7, 29.5, 29.4, 29.4, 27.2, 24.7, 24.7, 11.0. HRMS (ESI): Calcd. for C41H49N4 [M+H]+: 597.3952; found: 597.3941.

(22) (6a-*cis*)-12-benzyl-2-(tert-butyl)-5-ethyl-5,6,6a,7,12,12ahexahydrodibenzo[*b*,*h*][1,6]naphthy-ridine (**C22**)

White solid; m.p. : 102-104 ºC, (59.9 mg, 73% yield); 1H NMR (400 MHz, CDCl3) δ 7.31 – 7.24 (m, 2H), 7.21 (d, *J* = 7.2 Hz, 3H), 7.12 (dd, *J* = 8.6, 2.4 Hz, 1H), 7.04 – 6.98 (m, 2H), 6.94 (d, *J* = 2.4 Hz, 1H), 6.67 – 6.58 (m, 2H), 6.54 (d, *J* = 8.6 Hz, 1H), 4.85 (d, *J* = 17.4 Hz, 1H), 4.56 (d, *J* = 3.2 Hz, 1H), 4.40 (d, *J* = 17.4 Hz, 1H), 3.42 – 3.27 (m, 4H), 3.07 (dd, *J* = 16.6, 5.6 Hz, 1H), 2.76 (dd, *J* = 16.6, 6.4 Hz, 1H), 2.63 – 2.53 (m, 1H), 1.21 – 1.14 (m, 12H). 13C NMR (101 MHz, CDCl3) δ 144.0, 141.6, 139.5, 137.3, 129.5, 128.3, 127.2, 126.7, 126.6, 126.4, 125.5, 120.9, 120.7, 116.3, 112.5, 109.8, 58.2, 52.8, 49.8, 44.7, 33.5, 31.5, 30.0, 11.2, 1.1. HRMS (ESI): Calcd. for C29H35N2 [M+H]+: 411.2795; found: 411.2787.

(23) (6a-*cis*)-12-benzyl-5-ethyl-1,3-dimethoxy-5,6,6a,7,12,12a-hexahydrodibenzo[*b*,*h*][1,6]napht-hyridine (**C23**)

Brown solid; m.p. : 87-89 ºC, (65.4 mg, 79% yield); 1H NMR (400 MHz, CDCl3) δ 7.37 – 7.22 (m, 5H), 7.09 – 7.03 (m, 2H), 6.72 – 6.64 (m, 2H), 6.56 (s, 1H), 6.29 (s, 1H), 4.92 (d, *J* = 17.2 Hz, 1H), 4.55 (d, *J* = 3.2 Hz, 1H), 4.47 (d, *J* = 17.4 Hz, 1H), 3.91 (s, 3H), 3.67 (s, 3H), 3.48 – 3.29 (m, 4H), 3.08 (dd, *J* = 16.6, 5.8 Hz, 1H), 2.81 (dd, *J* = 16.6, 6.8 Hz, 1H), 2.66 – 2.55 (m, 1H), 1.24 (t, *J* = 7.0 Hz, 3H). 13C NMR (101 MHz, CDCl3) δ 149.9, 143.9, 139.6, 139.5, 138.9, 129.6, 128.5, 127.3, 126.7, 126.6, 120.8, 116.5, 114.9, 113.5, 112.6, 96.5, 57.6, 56.9, 56.0, 53.1, 50.0, 45.3, 30.3, 29.9, 11.3. HRMS (ESI): Calcd. for C27H31N2O2 [M+H]+: 415.2380; found: 415.2373.

(24) (6a-*cis*)-12-benzyl-2-bromo-5-ethyl-5,6,6a,7,12,12a-hexahydrodibenzo[*b*,*h*][1,6]naphthyridi-ne (**C24**)

White solid; m.p. : 134-136 ºC, (27.6 mg, 32% yield); 1H NMR (400 MHz, CDCl3) δ 7.36 – 7.23 (m, 5H), 7.17 (dd, *J* = 8.7, 2.4 Hz, 1H), 7.11 – 6.96 (m, 3H), 6.73 – 6.63 (m, 2H), 6.45 (d, *J* = 8.8 Hz, 1H), 5.03 (d, *J* = 17.0 Hz, 1H), 4.60 – 4.41 (m, 2H), 3.56 (dd, *J* = 11.7, 5.0 Hz, 1H), 3.36 (q, *J* = 7.2 Hz, 2H), 3.29 (dd, *J* = 11.6, 5.4 Hz, 1H), 2.87 (dd, *J* = 16.4, 5.4 Hz, 1H), 2.73 (dd, *J* = 16.3, 9.2 Hz, 1H), 2.60 – 2.51 (m, 1H), 1.20 (t, *J* = 7.0 Hz, 3H). 13C NMR (101 MHz, CDCl3) δ 143.3, 142.6, 139.1, 131.1, 130.9, 129.6, 128.6, 127.3, 126.8, 126.6, 124.1, 120.7, 116.7, 112.5, 111.8, 106.8, 58.2, 54.3, 50.7, 44.7, 29.5, 29.4, 10.9. HRMS (ESI): Calcd. for C25H26BrN2 [M+H]+: 433.1274; found: 433.1267.

(25) (6a-*cis*)-12-benzyl-3-chloro-5-ethyl-5,6,6a,7,12,12a-hexahydrodibenzo[*b*,*h*][1,6]naphthyridi-ne (**C25**)

Black solid; m.p. : 90-92 ºC, (34.9 mg, 45% yield); 1H NMR (400 MHz, CDCl3) δ 7.36 – 7.21 (m, 5H), 7.06 – 6.97 (m, 2H), 6.90 (d, *J* = 7.9 Hz, 1H), 6.68 – 6.61 (m, 2H), 6.55 (d, *J* = 1.9 Hz, 1H), 6.50 (dd, *J* = 8.0, 1.8 Hz, 1H), 4.95 (d, *J* = 17.0 Hz, 1H), 4.50 (d, *J* = 3.4 Hz, 1H), 4.46 (d, *J* = 17.2 Hz, 1H), 3.53 (dd, *J* = 11.7, 4.9 Hz, 1H), 3.42 – 3.28 (m, 3H), 2.93 (dd, *J* = 16.4, 5.4 Hz, 1H), 2.72 (dd, *J* = 16.4, 8.6 Hz, 1H), 2.62 – 2.48 (m, 1H), 1.22 (t, *J* = 7.0 Hz, 3H). 13C NMR (101 MHz, CDCl3) δ 144.7, 143.4, 139.2, 134.3, 129.7, 129.6, 128.5, 127.3, 126.7, 126.5, 120.7, 120.2, 116.7, 114.8, 112.6, 109.8, 57.9, 53.9, 50.3, 44.7, 29.5, 29.3, 10.9. HRMS (ESI): Calcd. for C25H26ClN2 [M+H]+: 389.1779; found: 389.1766.

(26) (6a-*cis*)-12-benzyl-5-methyl-5,6,6a,7,12,12a-hexahydrodibenzo[*b*,*h*][1,6]naphthyridine (**C26**)

Brown solid; m.p. : 121-123 ºC, (48.3 mg, 71% yield); 1H NMR (500 MHz, CDCl3) δ 7.29 – 7.14 (m, 5H), 7.12 – 7.05 (m, 1H), 7.00 – 6.90 (m, 3H), 6.61 – 6.50 (m, 4H), 4.93 (dd, *J* = 17.1, 4.2 Hz, 1H), 4.51 (d, *J* = 7.4 Hz, 1H), 4.45 (dd, *J* = 17.1, 4.2 Hz, 1H), 3.50 (dd, *J* = 8.2, 5.6 Hz, 1H), 3.15 (dd, *J* = 11.1, 4.4 Hz, 1H), 2.88 (s, 3H), 2.84 – 2.73 (m, 1H), 2.68 – 2.55 (m, 2H). 13C NMR (126 MHz, CDCl3) δ 145.2, 143.7, 139.4, 129.6, 128.5, 128.0, 127.3, 126.7, 126.6, 122.9, 120.8, 116.3, 116.0, 112.1, 110.6, 58.4, 53.9, 53.7, 38.2, 30.6, 30.2. HRMS (ESI): Calcd. for C24H25N2 [M+H]+: 341.2012; found: 341.2010.

(27) (6a-*cis*)-12-benzyl-2-methoxy-5-methyl-5,6,6a,7,12,12a-hexahydrodibenzo[*b*,*h*][1,6]naphth-yridine (**C27**)

White solid; m.p. : 91-93 ºC, (59.9 mg, 81% yield); 1H NMR (400 MHz, CDCl3) δ 7.39 – 7.32 (m, 4H), 7.30 – 7.25 (m, 1H), 7.06 (t, *J* = 7.8 Hz, 1H), 7.00 (d, *J* = 7.4 Hz, 1H), 6.78 (dd, *J* = 8.6, 2.9 Hz, 1H), 6.73 – 6.57 (m, 4H), 5.07 (d, *J* = 17.2 Hz, 1H), 4.59 (s, 1H), 4.55 (s, 1H), 3.73 (s, 3H), 3.59 (dd, *J* = 10.8, 5.4 Hz, 1H), 3.05 (dd, *J* = 11.2, 3.8 Hz, 1H), 2.92 (s, 3H), 2.80 (d, *J* = 14.4 Hz, 1H), 2.75 – 2.61 (m, 2H). 13C NMR (101 MHz, CDCl3) δ 151.44, 143.67, 139.93, 139.16, 129.43, 128.61, 127.29, 126.80, 126.62, 125.75, 121.00, 116.31, 114.47, 112.68, 111.93, 111.72, 58.55, 55.74, 54.67, 54.43, 38.71, 31.02, 30.45. HRMS (ESI): Calcd. for C25H27N2O [M+H]+: 371.2118; found: 371.2111.

(28) (6a-*cis*)-12-benzyl-5-isopropyl-5,6,6a,7,12,12a-hexahydrodibenzo[*b*,*h*][1,6]naphthyridine (**C28**)

Yellow solid; m.p. : 116-118 ºC, (63.3 mg, 86% yield); 1H NMR (400 MHz, CDCl3) δ 7.40 – 7.24 (m, 5H), 7.18 (t, *J* = 7.8 Hz, 1H), 7.09 – 7.00 (m, 3H), 6.75 (d, *J* = 8.4 Hz, 1H), 6.71 – 6.64 (m, 2H), 6.59 (t, *J* = 7.3 Hz, 1H), 5.03 (d, *J* = 17.2 Hz, 1H), 4.58 (d, *J* = 3.2 Hz, 1H), 4.53 (d, *J* = 17.2 Hz, 1H), 4.21 (p, *J* = 6.8 Hz, 1H), 3.47 (dd, *J* = 11.5, 5.4 Hz, 1H), 3.30 (dd, *J* = 11.5, 6.2 Hz, 1H), 2.95 (dd, *J* = 16.2, 5.4 Hz, 1H), 2.74 (dd, *J* = 16.2, 8.2 Hz, 1H), 2.68 – 2.57 (m, 1H), 1.33 (d, *J* = 6.8 Hz, 3H), 1.29 (d, *J* = 6.8 Hz, 3H). 13C NMR (101 MHz, CDCl3) δ 144.3, 143.8, 139.6, 129.7, 128.9, 128.7, 128.5, 127.2, 126.7, 126.6, 122.4, 120.8, 116.4, 115.0, 112.3, 110.5, 58.6, 53.7, 46.9, 42.8, 29.9, 29.8, 19.2, 18.7. HRMS (ESI): Calcd. for C26H29N2 [M+H]+: 369.2325; found: 369.2316.

(29) (6a-*cis*)-5,12-dibenzyl-5,6,6a,7,12,12a-hexahydrodibenzo[*b*,*h*][1,6]naphthyridine (**C29**)

Brown solid; m.p. : 115-117 ºC, (63.2 mg, 76% yield); 1H NMR (400 MHz, CDCl3) δ 7.45 – 7.24 (m, 10H), 7.12 – 6.98 (m, 4H), 6.74 – 6.52 (m, 4H), 5.03 (dd, *J* = 17.2, 2.2 Hz, 1H), 4.67 (d, *J* = 5.4 Hz, 1H), 4.63 – 4.48 (m, 3H), 3.62 (dd, *J* = 11.4, 5.0 Hz, 1H), 3.44 (dd, *J* = 11.5, 6.2 Hz, 1H), 2.98 (dd, *J* = 16.5, 5.4 Hz, 1H), 2.85 (dd, *J* = 16.3, 8.4 Hz, 1H), 2.70 (dd, *J* = 8.8, 2.8 Hz, 1H). 13C NMR (101 MHz, CDCl3) δ 144.6, 143.7, 139.5, 138.6, 129.7, 128.8, 128.7, 128.6, 127.3, 127.1, 126.7, 126.7, 126.6, 122.0, 120.8, 116.5, 116.0, 112.4, 111.1, 58.5, 54.5, 53.8, 51.6, 30.5, 29.8. HRMS (ESI): Calcd. for C30H29N2 [M+H]+: 417.2325; found: 417.2317.

(30) (8a-*cis*)-7,14-dibenzyl-7,8,8a,9,14,14a-hexahydrobenzo[*b*]naphtho[2,1-*h*][1,6]naphthyridine (**C30**)

Brown solid; m.p. : 111-113 ºC, (40.0 mg, 43% yield); 1H NMR (500 MHz, CDCl3) δ 7.81 (d, *J* = 8.8 Hz, 1H), 7.61 (d, *J* = 8.0 Hz, 1H), 7.52 (d, *J* = 9.2 Hz, 1H), 7.36 – 7.21 (m, 6H), 7.15 – 7.02 (m, 5H), 6.99 (t, *J* = 7.9 Hz, 1H), 6.92 (d, *J* = 7.4 Hz, 2H), 6.87 (d, *J* = 9.2 Hz, 1H), 6.65 (t, *J* = 7.3 Hz, 1H), 6.54 (d, *J* = 8.4 Hz, 1H), 5.34 (s, 1H), 4.74 (d, *J* = 17.4 Hz, 1H), 4.42 (d, *J* = 17.4 Hz, 2H), 4.21 (d, *J* = 17.0 Hz, 1H), 3.69 (t, *J* = 12.2 Hz, 1H), 3.46 (dd, *J* = 16.9, 6.4 Hz, 1H), 3.30 (dd, *J* = 11.2, 5.5 Hz, 1H), 2.74 (d, *J* = 17.0 Hz, 1H), 2.69 – 2.60 (m, 1H).13C NMR (126 MHz, CDCl3) δ 144.7, 143.2, 141.1, 138.4, 134.1, 130.0, 129.7, 128.8, 128.6, 128.0, 127.3, 127.1, 126.8, 126.5, 126.4, 126.2, 126.0, 121.0, 120.9, 120.2, 116.7, 114.9, 113.4, 110.7, 54.6, 52.0, 50.3, 48.6, 31.2, 30.9. HRMS (ESI): Calcd. for C34H31N2 [M+H]+: 467.2482; found: 467.2480.

(31) (6a-*cis*)-5-allyl-12-benzyl-5,6,6a,7,12,12a-hexahydrodibenzo[*b*,*h*][1,6]naphthyridine (**C31**)

Brown solid; m.p. : 85-87 ºC, (63.0 mg, 86% yield); 1H NMR (400 MHz, CDCl3) δ 7.36 – 7.20 (m, 5H), 7.11 (t, *J* = 7.8 Hz, 1H), 7.06 – 6.97 (m, 3H), 6.65 (d, *J* = 7.8 Hz, 2H), 6.62 – 6.55 (m, 2H), 5.96 – 5.83 (m, 1H), 5.26 (dd, *J* = 11.4, 1.8 Hz, 1H), 5.23 – 5.21 (m, 1H), 4.99 (d, *J* = 17.2 Hz, 1H), 4.60 (d, *J* = 3.4 Hz, 1H), 4.51 (d, *J* = 17.2 Hz, 1H), 3.94 (d, *J* = 4.9 Hz, 2H), 3.55 (dd, *J* = 11.4, 5.2 Hz, 1H), 3.36 (dd, *J* = 11.4, 6.0 Hz, 1H), 2.95 (dd, *J* = 16.2, 5.4 Hz, 1H), 2.77 (dd, *J* = 16.3, 8.4 Hz, 1H), 2.69 – 2.60 (m, 1H). 13C NMR (101 MHz, CDCl3) δ 144.1, 143.7, 139.4, 133.2, 129.6, 128.6, 128.5, 127.2, 126.6, 126.6, 121.9, 120.7, 116.4, 116.2, 115.6, 112.3, 110.8, 58.4, 53.7, 53.0, 51.0, 30.3, 29.8. HRMS (ESI): Calcd. for C26H27N2 [M+H]+: 367.2169; found: 367.2162.

(32) ethyl 2-((6a-*cis*)-12-benzyl-6a,7,12,12a-tetrahydrodibenzo[*b*,*h*][1,6]naphthyridin-5(6H)-yl)-acetate (**C32**)

Brown solid; m.p. : 113-115 ºC, (41.2 mg, 50% yield); 1H NMR (400 MHz, CDCl3) δ 7.38 – 7.21 (m, 5H), 7.10 (t, *J* = 7.8 Hz, 1H), 7.05 – 6.95 (m, 3H), 6.70 – 6.56 (m, 3H), 6.41 (d, *J* = 8.2 Hz, 1H), 5.01 (d, *J* = 17.2 Hz, 1H), 4.61 (d, *J* = 3.4 Hz, 1H), 4.53 (d, *J* = 17.2 Hz, 1H), 4.25 (q, *J* = 7.2 Hz, 2H), 4.03 (d, *J* = 4.0 Hz, 2H), 3.70 (dd, *J* = 11.0, 5.2 Hz, 1H), 3.43 (dd, *J* = 11.0, 5.4 Hz, 1H), 3.03 – 2.78 (m, 2H), 2.72 – 2.63 (m, 1H), 1.32 (t, *J* = 7.2 Hz, 3H). 13C NMR (101 MHz, CDCl3) δ 170.8, 143.6, 143.5, 139.3, 129.6, 128.6, 128.5, 128.4, 127.2, 126.7, 126.6, 122.4, 120.9, 116.7, 116.4, 112.2, 110.1, 61.0, 58.3, 54.2, 52.4, 52.2, 30.2, 29.5, 14.3. HRMS (ESI): Calcd. for C27H29N2O2 [M+H]+: 413.2224; found: 413.2218.

(33) (6a-*cis*)-12-benzyl-2-methyl-5-(*p*-tolyl)-5,6,6a,7,12,12a-hexahydrodibenzo[*b*,*h*][1,6]naphtha-yridine (**C33**)

Yellow solid; m.p. : 149-151 ºC, (41.3 mg, 48% yield); 1H NMR (500 MHz, CDCl3) δ 7.21 – 7.14 (m, 4H), 7.14 – 7.09 (m, 1H), 7.07 – 7.00 (m, 4H), 6.93 – 6.85 (m, 2H), 6.77 (s, 1H), 6.70 (dd, *J* = 8.3, 2.0 Hz, 1H), 6.59 (d, *J* = 8.4 Hz, 1H), 6.51 (d, *J* = 7.8 Hz, 2H), 4.94 (d, *J* = 17.2 Hz, 1H), 4.49 (d, *J* = 3.0 Hz, 1H), 4.42 (d, *J* = 17.2 Hz, 1H), 3.77 (dd, *J* = 11.2, 5.2 Hz, 1H), 3.44 (dd, *J* = 11.4, 5.2 Hz, 1H), 2.86 – 2.78 (m, 1H), 2.71 – 2.61 (m, 2H), 2.25 (s, 3H), 2.10 (s, 3H). 13C NMR (126 MHz, CDCl3) δ 144.9, 144.0, 141.1, 139.4, 132.8, 130.0, 129.5, 129.0, 128.6, 128.5, 127.4, 127.3, 126.7, 126.5, 125.3, 123.4, 120.8, 116.4, 116.1, 112.2, 58.5, 54.0, 52.3, 32.0, 30.2, 20.9, 20.7. HRMS (ESI): Calcd. forC31H31N2 [M+H]+: 431.2482; found: 431.2482.

(34) (8a-*cis*)-14-benzyl-5,6,8a,9,14,14a-hexahydro-4H,8H-benzo[*b*]quinolino[1,8-*gh*][1,6]naphth-ayridine (**C34**)

Black solid; m.p. : 99-101 ºC, (51.2 mg, 70% yield); 1H NMR (400 MHz, CDCl3) δ 7.40 – 7.24 (m, 5H), 7.13 – 7.02 (m, 2H), 6.91 (t, *J* = 7.2 Hz, 2H), 6.68 (t, *J* = 7.4 Hz, 2H), 6.52 (t, *J* = 7.4 Hz, 1H), 5.02 (d, *J* = 17.2 Hz, 1H), 4.60 (d, *J* = 3.4 Hz, 1H), 4.53 (d, *J* = 17.2 Hz, 1H), 3.51 (dd, *J* = 11.6, 5.4 Hz, 1H), 3.39 – 3.20 (m, 3H), 3.00 (dd, *J* = 16.2, 5.2 Hz, 1H), 2.89 – 2.74 (m, 3H), 2.72 – 2.62 (m, 1H), 2.08 – 1.95 (m, 2H). 13C NMR (101 MHz, CDCl3) δ 143.8, 141.0, 139.7, 129.6, 128.5, 128.2, 127.3, 126.7, 126.6, 126.6, 121.4, 120.9, 120.8, 116.3, 114.8, 112.2, 58.4, 53.7, 52.2, 49.8, 30.1, 30.0, 27.8, 21.9. HRMS (ESI): Calcd. for C26H27N2 [M+H]+: 367.2169; found: 367.2169.

(35) (8a-*cis*)-14-benzyl-2-methoxy-5,6,8a,9,14,14a-hexahydro-4H,8H-benzo[*b*]quinolino[1,8-*gh*][1,6]naphthyridine (**C35**)

Brown solid; m.p. : 97-99 ºC, (55.6 mg, 70% yield); 1H NMR (500 MHz, CDCl3) δ 7.29 – 7.22 (m, 4H), 7.20 – 7.16 (m, 1H), 6.99 – 6.91 (m, 2H), 6.61 – 6.54 (m, 2H), 6.44 (d, *J* = 11.2 Hz, 2H), 4.95 (d, *J* = 17.0 Hz, 1H), 4.50 – 4.41 (m, 2H), 3.62 (s, 3H), 3.41 (dd, *J* = 11.4, 5.6 Hz, 1H), 3.19 (dt, *J* = 11.3, 5.8 Hz, 1H), 3.10 – 3.01 (m, 2H), 2.86 – 2.66 (m, 4H), 2.62 – 2.54 (m, 1H), 1.99 – 1.88 (m, 2H).13C NMR (126 MHz, CDCl3) δ 150.3, 143.6, 139.4, 135.5, 129.4, 128.5, 127.1, 126.7, 126.6, 123.1, 122.8, 121.1, 116.3, 113.5, 112.4, 112.2, 58.5, 55.7, 54.3, 53.1, 49.9, 30.2, 30.1, 27.9, 22.1. HRMS (ESI): Calcd. for C27H29N2O [M+H]+: 397.2274; found: 397.2275.

(36) (9a-*cis*)-15-benzyl-4,5,6,7,9a,10,15,15a-octahydro-9H-azepino[3,2,1-*ij*]quinolino[3,2-*c*]quin-oline (**C36**)

Brown solid; m.p. : 66-68 ºC, (35.7 mg, 47% yield); 1H NMR (400 MHz, CDCl3) δ 7.38 – 7.20 (m, 5H), 7.09 – 7.02 (m, 2H), 6.98 (d, *J* = 7.4 Hz, 1H), 6.90 (d, *J* = 7.6 Hz, 1H), 6.69 – 6.61 (m, 3H), 5.00 (d, *J* = 17.2 Hz, 1H), 4.60 – 4.44 (m, 2H), 3.49 – 3.40 (m, 2H), 3.36 (dd, *J* = 11.1, 6.6 Hz, 1H), 3.28 – 3.20 (m, 1H), 3.04 – 2.95 (m, 1H), 2.92 – 2.79 (m, 2H), 2.76 – 2.63 (m, 2H), 1.97 – 1.75 (m, 4H). 13C NMR (101 MHz, CDCl3) δ 145.9, 144.2, 139.7, 130.9, 130.7, 129.6, 128.5, 127.2, 126.8, 126.6, 126.5, 126.4, 120.8, 117.9, 116.4, 112.3, 58.8, 54.6, 54.1, 53.1, 34.0, 32.5, 30.2, 27.8, 25.6. HRMS (ESI): Calcd. for C27H29N2 [M+H]+: 381.2325; found: 381.2317.

(37) (6a-*cis*)-12-benzyl-5-ethyl-10-phenyl-5,6,6a,7,12,12a-hexahydrobenzo[h]pyrido[2,3-*b*][1,6] naphthyridine (**C37**)

Yellow solid; m.p. : 156-158 ºC, (53.4 mg, 62% yield); 1H NMR (500 MHz, CDCl3) δ 7.87 – 7.84 (m, 2H), 7.26 (t, *J* = 7.9 Hz, 2H), 7.23 – 7.14 (m, 5H), 7.13 – 7.05 (m, 2H), 7.03 – 6.96 (m, 2H), 6.88 (d, *J* = 7.5 Hz, 1H), 6.48 – 6.42 (m, 2H), 6.05 (d, *J* = 15.4 Hz, 1H), 4.51 (d, *J* = 3.8 Hz, 1H), 4.30 (d, *J* = 15.6 Hz, 1H), 3.41 (dd, *J* = 11.7, 5.0 Hz, 1H), 3.23 – 3.12 (m, 2H), 3.02 (dd, *J* = 11.7, 4.6 Hz, 1H), 2.67 – 2.47 (m, 2H), 2.39 – 2.24 (m, 1H), 1.03 (t, *J* = 7.2 Hz, 3H). 13C NMR (126 MHz, CDCl3) δ 154.0, 153.2, 143.5, 140.4, 140.1, 137.2, 128.6, 128.4, 128.3, 128.1, 127.6, 126.6, 126.5, 121.6, 115.5, 114.4, 110.3, 108.6, 56.6, 50.8, 50.6, 44.7, 29.6, 28.9, 11.0. HRMS (ESI): Calcd. for C30H30N3 [M+H]+: 432.2434; found: 432.2428.

(38) (8a-*cis*)-14-benzyl-12-phenyl-5,6,8a,9,14,14a-hexahydro-4H,8H-pyrido[2,3-*b*]quinolino[1,8-*gh*][1,6]naphthyridine (**C38**)

Red solid; m.p. : 131-133 ºC, (44.3 mg, 50% yield); 1H NMR (500 MHz, CDCl3) δ 7.93 (d, *J* = 7.8 Hz, 2H), 7.34 (t, *J* = 7.5 Hz, 2H), 7.30 – 7.13 (m, 7H), 6.96 (d, *J* = 7.6 Hz, 1H), 6.89 (d, *J* = 7.6 Hz, 1H), 6.81 (d, *J* = 7.4 Hz, 1H), 6.45 (t, *J* = 7.4 Hz, 1H), 6.08 – 5.96 (m, 1H), 4.57 (d, *J* = 3.8 Hz, 1H), 4.43 (d, *J* = 15.6 Hz, 1H), 3.39 (dd, *J* = 11.6, 5.2 Hz, 1H), 3.18 (td, *J* = 11.3, 6.7, 4.7 Hz, 1H), 3.04 (td, *J* = 16.6, 11.5, 4.8 Hz, 2H), 2.75 – 2.68 (m, 2H), 2.69 – 2.62 (m, 2H), 2.44 – 2.37 (m, 1H), 1.93 – 1.80 (m, 2H).13C NMR (126 MHz, CDCl3) δ 154.1, 153.2, 140.8, 140.5, 140.1, 137.1, 128.4, 128.3, 128.2, 128.1, 127.6, 126.5, 126.1, 121.4, 120.5, 115.1, 114.4, 108.5, 56.5, 52.3, 50.5, 49.8, 29.6, 29.3, 27.7, 21.8. HRMS (ESI): Calcd. for C31H30N3 [M+H]+: 444.2434; found: 444.2433.

(39) (6a-*cis*)-12-benzyl-5-ethyl-10-(furan-2-yl)-5,6,6a,7,12,12a-hexahydrobenzo[*h*]pyrido[2,3-*b*][1,6]naphthyridine (**C39**)

Black solid; m.p. : 136-138 ºC, (48.8 mg, 58% yield); 1H NMR (500 MHz, CDCl3) δ 7.40 (s, 1H), 7.31 – 7.16 (m, 5H), 7.14 – 7.01 (m, 3H), 6.91 (dd, *J* = 7.5, 1.6 Hz, 1H), 6.86 – 6.80 (m, 1H), 6.58 – 6.51 (m, 2H), 6.42 (s, 1H), 6.03 (d, *J* = 15.4 Hz, 1H), 4.58 (d, *J* = 3.6 Hz, 1H), 4.33 (d, *J* = 15.4 Hz, 1H), 3.49 (dd, *J* = 11.8, 4.8 Hz, 1H), 3.37 – 3.20 (m, *J* = 7.2 Hz, 2H), 3.10 (dd, *J* = 12.0, 4.6 Hz, 1H), 2.71 – 2.57 (m, 2H), 2.41 – 2.29 (m, 1H), 1.19 – 1.08 (m, 3H). 13C NMR (126 MHz, CDCl3) δ 155.1, 153.9, 145.7, 143.5, 142.2, 140.3, 136.9, 128.5, 128.3, 128.1, 127.7, 126.6, 121.5, 115.4, 114.6, 111.7, 110.2, 107.1, 107.0, 56.5, 50.8, 50.5, 44.6, 29.5, 29.0, 11.0. HRMS (ESI): Calcd. for C28H28N3O [M+H]+: 422.2227; found: 422.2218.

(40) (6a-*cis*)-12-benzyl-5-ethyl-10-(thiophen-2-yl)-5,6,6a,7,12,12a-hexahydrobenzo[*h*]pyrido[2,3-*b*][1,6]naphthyridine (**C40**)

Black solid; m.p. : 81-83 ºC, (63.8 mg, 73% yield); 1H NMR (500 MHz, CDCl3) δ 7.44 (dd, *J* = 3.7, 1.2 Hz, 1H), 7.32 (d, *J* = 7.6 Hz, 2H), 7.29 – 7.14 (m, 4H), 7.13 – 7.02 (m, 3H), 7.01 (dd, *J* = 5.0, 3.6 Hz, 1H), 6.86 (d, *J* = 7.6 Hz, 1H), 6.59 – 6.49 (m, 2H), 6.02 (s, 1H), 4.60 (d, *J* = 3.8 Hz, 1H), 4.35 (d, *J* = 15.4 Hz, 1H), 3.51 (dd, *J* = 11.7, 4.8 Hz, 1H), 3.35 – 3.18 (m, *J* = 7.4 Hz, 2H), 3.10 (dd, *J* = 11.7, 4.4 Hz, 1H), 2.64 (dd, *J* = 8.2, 3.6 Hz, 2H), 2.44 – 2.29 (m, 1H), 1.11 (t, *J* = 7.0 Hz, 3H). 13C NMR (126 MHz, CDCl3) δ 153.6, 148.6, 146.7, 143.5, 140.2, 137.0, 128.5, 128.3, 127.8, 127.63, 126.6, 126.1, 123.1, 121.5, 115.5, 114.3, 110.2, 107.0, 56.6, 50.9, 50.6, 44.6, 29.5, 28.8, 11.0. HRMS (ESI): Calcd. for C28H28N3S [M+H]+: 438.1998; found: 438.1988.

(41) (9a-*cis*)-15-benzyl-13-(thiophen-2-yl)-4,5,6,7,9a,10,15,15a-octahydro-9H-azepino[3',2',1':8,1]quinolino[4,3-*b*][1,8]naphthyridine (**C41**)

Brown solid; m.p. : 92-94 ºC, (61.2 mg, 66% yield); 1H NMR (500 MHz, CDCl3) δ 7.35 (d, *J* = 3.4 Hz, 1H), 7.21 (d, *J* = 7.2 Hz, 2H), 7.16 – 7.11 (m, 3H), 7.09 (d, *J* = 2.8 Hz, 1H), 6.99 (dd, *J* = 7.5, 2.0 Hz, 1H), 6.94 – 6.88 (m, 1H), 6.85 – 6.73 (m, 3H), 6.56 – 6.50 (m, 1H), 5.80 (s, 1H), 4.42 (d, *J* = 3.6 Hz, 1H), 4.38 – 4.28 (m, 1H), 3.29 – 3.13 (m, 2H), 3.08 – 3.01 (m, 1H), 2.97 – 2.85 (m, 1H), 2.78 – 2.55 (m, 3H), 2.50 – 2.42 (m, 1H), 2.38 – 2.32 (m, 1H), 1.78 – 1.55 (m, 4H). 13C NMR (126 MHz, CDCl3) δ 154.1, 148.6, 146.7, 145.6, 140.4, 137.0, 130.9, 130.6, 128.2, 127.9, 127.6, 126.5, 126.2, 126.1, 125.9, 123.1, 118.1, 114.3, 107.0, 57.1, 54.3, 54.0, 50.3, 33.9, 32.2, 29.3, 27.7, 25.6. HRMS (ESI): Calcd. for C30H30N3S [M+H]+: 464.2155; found: 464.2154.

(42) (6a-*cis*)-12-benzyl-2-methoxy-5-methyl-10-(1-methyl-1H-pyrrol-2-yl)-5,6,6a,7,12,12a-hexahydrobenzo[*h*]pyrido[2,3-*b*][1,6]naphthyridine (**C42**)

Brown solid; m.p. : 92-95 ºC, (46.8 mg, 52% yield); 1H NMR (500 MHz, CDCl3) δ 7.29 – 7.21 (m, 4H), 7.21 – 7.16 (m, 1H), 7.09 (d, *J* = 7.6 Hz, 1H), 6.79 (d, *J* = 7.6 Hz, 1H), 6.72 (dd, *J* = 8.7, 3.0 Hz, 1H), 6.68 (d, *J* = 3.0 Hz, 1H), 6.57 (d, *J* = 2.2 Hz, 1H), 6.53 (d, *J* = 8.8 Hz, 1H), 6.47 (dt, *J* = 3.1, 1.4 Hz, 1H), 6.11 – 6.07 (m, 1H), 6.01 (d, *J* = 16.0 Hz, 1H), 4.54 (d, *J* = 3.4 Hz, 1H), 4.32 (d, *J* = 16.2 Hz, 1H), 3.67 (s, 3H), 3.66 (s, 3H), 3.49 (dd, *J* = 11.2, 5.4 Hz, 1H), 2.86 (dd, *J* = 11.2, 3.0 Hz, 1H), 2.81 (s, 3H), 2.63 – 2.52 (m, 3H).13C NMR (126 MHz, CDCl3) δ 153.4, 151.7, 149.2, 139.8, 139.7, 136.8, 133.1, 128.3, 126.9, 126.5, 125.5, 125.3, 113.8, 112.8, 112.1, 111.9, 110.0, 109.5, 107.1, 56.7, 55.8, 54.5, 51.0, 38.7, 36.9, 31.0, 30.0. HRMS (ESI): Calcd. for C29H31N4O [M+H]+: 451.2492; found: 451.2490.

(43) (6a-*cis*)-11-benzyl-5-ethyl-5,6,6a,7,11,11a-hexahydrobenzo[*h*]thieno[3,2-*b*][1,6]naphthyridi-ne (**C43**)

Brown solid; m.p. : 127-129 ºC, (36.1 mg, 50% yield); 1H NMR (500 MHz, CDCl3) δ 7.22 – 7.08 (m, 5H), 7.01 – 6.95 (m, 2H), 6.87 (d, *J* = 5.4 Hz, 1H), 6.52 (d, *J* = 5.4 Hz, 1H), 6.48 (d, *J* = 8.2 Hz, 1H), 6.41 (t, *J* = 7.3 Hz, 1H), 4.53 (d, *J* = 16.2 Hz, 1H), 4.19 (d, *J* = 3.2 Hz, 1H), 4.15 (d, *J* = 16.2 Hz, 1H), 3.35 – 3.18 (m, 4H), 2.90 – 2.84 (m, 1H), 2.52 (dd, *J* = 16.4, 6.2 Hz, 1H), 2.43 – 2.34 (m, 1H), 1.08 (t, *J* = 7.2 Hz, 3H).13C NMR (126 MHz, CDCl3) δ 144.0, 142.7, 140.3, 129.2, 128.7, 128.4, 127.24, 126.7, 121.4, 121.0, 119.2, 114.7, 112.4, 110.0, 57.2, 49.9, 46.8, 44.7, 25.0, 11.0, 1.0. HRMS (ESI): Calcd. for C23H25N2S [M+H]+: 361.1733; found: 361.1729.

(44) (6a-*cis*)-11-benzyl-5-cyclohexyl-5,6,6a,7,11,11a-hexahydrobenzo[h]thieno[3,2-*b*][1,6]napht-hyridine (**C44**)

Brwon solid; m.p. : 87-89 ºC, (51.3 mg, 62% yield); 1H NMR (400 MHz, CDCl3) δ 7.31 – 7.24 (m, 4H), 7.22 (d, *J* = 5.3, 3.8 Hz, 1H), 7.14 – 7.05 (m, 2H), 6.97 (d, *J* = 5.4 Hz, 1H), 6.64 (d, *J* = 8.4 Hz, 1H), 6.60 (d, *J* = 5.4 Hz, 1H), 6.51 (t, *J* = 7.3 Hz, 1H), 4.64 (d, *J* = 16.2 Hz, 1H), 4.30 – 4.19 (m, 2H), 3.64 (td, *J* = 12.8, 12.0, 6.6 Hz, 1H), 3.41 – 3.20 (m, 2H), 2.97 (dd, *J* = 16.5, 6.0 Hz, 1H), 2.59 (dd, *J* = 16.3, 5.6 Hz, 1H), 2.51 – 2.41 (m, 1H), 1.98 – 1.79 (m, 4H), 1.74 (d, *J* = 13.2 Hz, 1H), 1.62 – 1.49 (m, 2H), 1.47 – 1.36 (m, 3H).13C NMR (101 MHz, CDCl3) δ 144.3, 142.9, 140.5, 129.1, 128.8, 128.3, 127.2, 126.6, 121.3, 121.3, 119.2, 114.3, 113.2, 110.2, 57.4, 56.1, 43.6, 30.1, 29.5, 29.3, 26.3, 26.2, 26.1, 26.0, 25.2. HRMS (ESI): Calcd. for C27H31N2S [M+H]+: 415.2202; found: 415.2200

(45) (7a-*cis*)-7-benzyl-12-ethyl-7,7a,12,13,13a,14-hexahydroquinolino[4,3-*j*][1,7]phenanthroline (**C45**)

Brown solid; m.p. : 125-127 ºC, (59.9 mg, 74% yield); 1H NMR (500 MHz, CDCl3) δ 8.74 (dd, *J* = 4.3, 1.8 Hz, 1H), 7.85 (dd, *J* = 8.0, 2.0 Hz, 1H), 7.42 (d, *J* = 9.2 Hz, 1H), 7.28 (s, 2H), 7.27 (s, 2H), 7.24 – 7.18 (m, 1H), 7.10 (d, *J* = 9.2 Hz, 1H), 7.06 – 7.01 (m, 2H), 6.98 (d, *J* = 7.6 Hz, 1H), 6.54 (d, *J* = 8.8 Hz, 1H), 6.46 (t, *J* = 7.4 Hz, 1H), 5.13 (d, *J* = 17.2 Hz, 1H), 4.64 – 4.53 (m, 2H), 3.59 (dd, *J* = 11.6, 4.8 Hz, 1H), 3.52 (dd, *J* = 17.4, 5.8 Hz, 1H), 3.41 – 3.25 (m, 3H), 3.09 (dd, *J* = 17.4, 9.4 Hz, 1H), 2.70 – 2.58 (m, 1H), 1.17 (t, *J* = 7.0 Hz, 3H). 13C NMR (126 MHz, CDCl3) δ 149.7, 147.8, 143.9, 143.9, 139.1, 135.8, 128.7, 128.6, 128.0, 127.0, 126.6, 126.6, 121.4, 121.1, 117.0, 116.3, 115.0, 114.2, 110.2, 58.6, 54.7, 50.9, 44.8, 29.1, 24.5, 11.1. HRMS (ESI): Calcd. for C28H28N3 [M+H]+: 406.2278; found: 406.2268.

(46) (7a-*cis*)-7-benzyl-12-ethyl-10-methyl-7,7a,12,13,13a,14-hexahydroquinolino[4,3-*j*][1,7]phe-nanthroline (**C46**)

Yellow solid; m.p. : 111-113 ºC, (55.3 mg, 66% yield); 1H NMR (400 MHz, CDCl3) δ 8.79 (dd, *J* = 4.3, 1.8 Hz, 1H), 7.91 (dd, *J* = 8.0, 1.8 Hz, 1H), 7.47 (d, *J* = 9.2 Hz, 1H), 7.32 (d, *J* = 4.4 Hz, 4H), 7.28 – 7.22 (m, 1H), 7.14 (d, *J* = 9.2 Hz, 1H), 7.10 (dd, *J* = 8.1, 4.4 Hz, 1H), 6.90 (d, *J* = 7.6 Hz, 1H), 6.41 (s, 1H), 6.33 (d, *J* = 7.6 Hz, 1H), 5.16 (d, *J* = 17.2 Hz, 1H), 4.70 – 4.57 (m, 2H), 3.62 (dd, *J* = 11.6, 4.8 Hz, 1H), 3.55 (dd, *J* = 17.5, 6.0 Hz, 1H), 3.45 – 3.34 (m, 3H), 3.14 (dd, *J* = 17.5, 9.0 Hz, 1H), 2.73 – 2.62 (m, 1H), 2.25 (s, 3H), 1.22 (t, *J* = 7.0 Hz, 3H).13C NMR (126 MHz, CDCl3) δ 149.6, 147.8, 143.8, 143.8, 139.2, 138.3, 135.8, 128.6, 128.0, 126.9, 126.6, 126.5, 121.3, 118.3, 116.9, 116.3, 115.8, 114.2, 110.9, 58.4, 54.6, 50.9, 44.8, 29.1, 24.4, 21.7, 11.2. HRMS (ESI): Calcd. for C29H30N3 [M+H]+: 420.2434; found: 420.2430.

(47) (7a-*cis*)-14-benzyl-9-ethyl-7,7a,8,9,13b,14-hexahydroquinolino[4,3-*b*][1,10]phenanthroline (**C47**)

Brown solid; m.p. : 146-148 ºC, (68.8 mg, 85% yield); 1H NMR (500 MHz, CDCl3) δ 8.89 (d, *J* = 5.8 Hz, 1H), 7.96 (d, *J* = 9.8 Hz, 1H), 7.80 (d, *J* = 7.6 Hz, 2H), 7.57 (d, *J* = 7.6 Hz, 1H), 7.32 (m, 2H), 7.30 – 7.16 (m, 3H), 7.02 (d, *J* = 8.4 Hz, 1H), 6.89 (t, *J* = 7.18 Hz, 1H), 6.40 (d, *J* = 8.2 Hz, 1H), 6.34 (t, *J* = 7.4 Hz, 1H), 5.26 (d, *J* = 14.4 Hz, 1H), 4.46 (d, *J* = 14.4 Hz, 1H), 4.33 (d, *J* = 4.2 Hz, 1H), 3.64 (dd, *J* = 11.8, 3.8 Hz, 1H), 3.34 (dd, *J* = 14.8, 7.2 Hz, 1H), 3.24 (dd, *J* = 14.8, 7.4 Hz, 1H), 3.19 (d, *J* = 11.6 Hz, 1H), 2.81 – 2.66 (m, 2H), 2.48 – 2.37 (m, 1H), 1.11 (t, *J* = 7.0 Hz, 3H). 13C NMR (126 MHz, CDCl3) δ 147.9, 143.8, 143.7, 141.5, 140.9, 136.1, 129.1, 128.9, 128.3, 128.2, 127.8, 127.7, 127.4, 127.1, 121.7, 120.3, 120.2, 115.6, 109.2, 60.0, 55.5, 51.9, 44.9, 28.3, 23.5, 11.0. HRMS (ESI): Calcd. for C28H28N3 [M+H]+: 406.2278; found: 406.2267.

(48) (*cis*)-5-benzyl-10-bromo-12-ethyl-4b,5,6,10b,11,12-hexahydrodibenzo[*c*,*h*][1,6]naphthyridine (**C48**)

Brown solid; m.p. : 93-95 ºC, (51.8 mg, 60% yield); 1H NMR (400 MHz, CDCl3) δ 7.45 (d, *J* = 7.8 Hz, 1H), 7.36 – 7.20 (m, 6H), 7.14 (dd, *J* = 7.4, 1.8 Hz, 1H), 7.05 (t, *J* = 7.6 Hz, 1H), 6.95 (d, *J* = 7.6 Hz, 1H), 6.79 (d, *J* = 8.2 Hz, 1H), 6.65 (t, *J* = 7.2 Hz, 1H), 4.27 – 4.11 (m, 1H), 3.95 (ddd, *J* = 13.2, 8.6, 2.8 Hz, 2H), 3.69 – 3.55 (m, 2H), 3.52 – 3.35 (m, 4H), 3.15 (dd, *J* = 13.2, 1.8 Hz, 1H), 1.28 (t, *J* = 7.0 Hz, 3H). 13C NMR (101 MHz, CDCl3) δ 144.6, 140.4, 138.1, 135.9, 133.4, 130.5, 129.6, 128.3, 128.2, 127.8, 126.7, 125.8, 124.6, 119.1, 114.3, 111.1, 61.4, 57.6, 55.5, 49.0, 45.0, 38.8, 11.2. HRMS (ESI): Calcd. for C25H26BrN2 [M+H]+: 433.1274; found: 433.1271.

(49) (*cis*)-5-benzyl-12-ethyl-10-nitro-4b,5,6,10b,11,12-hexahydrodibenzo[*c*,*h*][1,6]naphthyridine (**C49**)

Yellow solid; m.p. : 94-96 ºC, (39.1 mg, 49% yield); 1H NMR (400 MHz, CDCl3) δ 7.81 (d, *J* = 8.0 Hz, 1H), 7.31 – 7.16 (m, 8H), 7.10 (dd, *J* = 7.4, 1.6 Hz, 1H), 6.74 (d, *J* = 8.2 Hz, 1H), 6.60 (td, *J* = 7.2, 1.0 Hz, 1H), 4.13 (d, *J* = 13.2 Hz, 1H), 4.07 – 3.99 (m, 2H), 3.86 – 3.76 (m, 1H), 3.65 (t, *J* = 1.6 Hz, 1H),3.60-3.51 (m, 2H), 3.43-3.34 (m, 2H), 3.11 (d, *J* = 16 Hz, 1H), 1.23 (t, *J* = 8 Hz, 3H).13C NMR (101 MHz, CDCl3) δ 149.0, 144.4, 140.0, 139.0, 133.0, 131.7, 131.6, 129.6, 128.4, 128.2, 126.9, 126.8, 122.9, 118.6, 114.3, 111.1, 60.8, 57.7, 55.4, 50.4, 45.0, 35.1, 11.1. HRMS (ESI): Calcd. for C25H26N3O2 [M+H]+: 400.2020; found: 400.2018.

(50) (*cis*)-1-benzyl-6-ethyl-4-phenyl-1,4,4a,5,6,10*b*-hexahydrobenzo[*h*][1,6]naphthyridine (**C51**)

Yellowish oil (25.0 mg, 49% yield); 1H NMR (500 MHz, CDCl3) δ 7.42 – 7.40 (m, 2H), 7.37 – 7.32 (m, 6H), 7.29 – 7.25 (m, 2H), 7.14 – 7.10 (m, 2H), 6.65 (d, *J* = 8.0 Hz, 2H), 6.58 (t, *J* = 7.2 Hz, 1H), 5.88 (dd, *J* = 4.7, 2.3 Hz, 1H), 3.67 (d, *J* = 12.7 Hz, 1H), 3.53 – 3.48 (m, 2H), 3.38 (dd, *J* = 17.2, 4.6 Hz, 1H), 3.23 (dq, *J* = 14.0, 6.9 Hz, 1H), 3.11 (dd, *J* = 14.2, 3.5 Hz, 1H), 3.05 (d, *J* = 11.4 Hz, 2H), 2.95 (dq, *J* = 14.2, 6.9 Hz, 1H), 2.86 – 2.82 (m, 1H), 2.39 (dd, *J* = 11.5, 3.8 Hz, 1H), 0.96 (t, *J* = 7.0 Hz, 3H). 13C NMR (126 MHz, CDCl3) δ 148.1, 140.9, 138.6, 138.1, 129.4, 129.1, 128.5, 128.3, 127.3, 127.2, 126.1, 124.8, 115.3, 112.1, 62.9, 53.7, 52.3, 51.6, 44.9, 37.4, 11.5. HRMS (ESI): Calcd. for C27H31N2 [M+H]+: 383.2482; found: 383.2476.

(51) (1S,2R,4S)-1,7,7-trimethylbicyclo[2.2.1]heptan-2-yl-(6a-*cis*)-12-(3-chloro-4-methoxybenzyl)-5-ethyl-5,6,6a,7,12,12a-hexahydrodibenzo[*b*,*h*][1,6]naphthyridine-9-carboxylate (**C51**)

Brown solid; m.p. : 101-103 ºC, (64.6 mg, 54% yield); 1H NMR (500 MHz, CDCl3) δ 7.70 (dd, *J* = 8.6, 2.2 Hz, 1H), 7.66 (d, *J* = 2.0 Hz, 1H), 7.14 (d, *J* = 2.2 Hz, 1H), 7.10 – 7.04 (m, 1H), 7.02 (d, *J* = 8.2 Hz, 1H), 6.90 (d, *J* = 7.8 Hz, 1H), 6.80 (d, *J* = 8.4 Hz, 1H), 6.58 – 6.48 (m, 3H), 5.03 (d, *J* = 15.2 Hz, 1H), 4.90 (d, *J* = 17.0 Hz, 1H), 4.55 (d, *J* = 3.4 Hz, 1H), 4.39 (d, *J* = 17.0 Hz, 1H), 3.84 (s, 3H), 3.54 – 3.48 (m, 1H), 3.40 – 3.28 (m, *J* = 7.3 Hz, 2H), 3.23 (dd, *J* = 11.7, 6.4 Hz, 1H), 2.94 (dd, *J* = 16.2, 4.8 Hz, 1H), 2.74 (dd, *J* = 16.4, 8.2 Hz, 1H), 2.60 – 2.52 (m, 1H), 2.45 – 2.35 (m, 1H), 2.13 – 2.05 (m, 1H), 1.80 – 1.73 (m, 1H), 1.68 (t, *J* = 4.6 Hz, 1H), 1.39 – 1.22 (m, 2H), 1.17 (t, *J* = 7.0 Hz, 3H), 1.09 – 1.01 (m, 1H), 0.93 (s, 3H), 0.88 (s, 3H), 0.86 (s, 3H). 13C NMR (126 MHz, CDCl3) δ 167.1, 153.9, 147.2, 143.7, 131.6, 131.2, 129.5, 129.1, 128.1, 125.6, 122.7, 120.8, 120.1, 118.5, 115.2, 112.2, 111.1, 110.4, 79.5, 58.9, 56.2, 52.7, 49.9, 49.0, 47.8, 45.1, 44.6, 37.0, 29.9, 29.7, 29.6, 28.1, 27.5, 19.8, 19.0, 13.6, 11.0. HRMS (ESI): Calcd. for C37H44ClN2O3 [M+H]+: 599.3035; found: 599.3028.

(52) (8R,9S,13S,17S)-3-(benzoyloxy)-13-methyl-7,8,9,11,12,13,14,15,16,17-decahydro-6H-cycl-openta[a]phenanthren-17-yl (6a-cis)-12-benzyl-5-ethyl-5,6,6a,7,12,12a-hexahydrodibenzo[*b*,*h*][1,6]naphthyridine-8-carboxylate (**C52**)

Yellow solid; m.p. : 105-107 ºC, (66.6 mg, 44% yield); 1H NMR (400 MHz, CDCl3) δ 8.25 (d, *J* = 7.8 Hz, 2H), 7.77 – 7.65 (m, 3H), 7.55 (t, *J* = 8.0 Hz, 2H), 7.39 – 7.32 (m, 5H), 7.27 – 7.24 (m, 1H), 7.15 (t, *J* = 8.0 Hz, 1H), 7.04 – 6.98 (m, 3H), 6.69 – 6.54 (m, 3H), 5.10 (d, *J* = 16.0 Hz, 1H), 4.99 – 4.90 (m, 1H), 4.66 – 4.54 (m, 2H), 3.62 – 3.55 (m, 1H), 3.40 (q, *J* = 8.0 Hz, 2H), 3.32 – 3.24 (m, 1H), 3.04 – 2.87 (m, 3H), 2.85 – 2.74 (m, 1H), 2.68 – 2.59 (m, 1H), 2.40 – 2.23 (m, 3H), 1.99 (t, *J* = 11.4 Hz, 2H), 1.88 – 1.79 (m, 1H), 1.75 – 1.33 (m, 7H), 1.23 (t, *J* = 7.2 Hz, 3H), 0.99 (s, 3H). 13C NMR (101 MHz, CDCl3) δ 166.9, 165.5, 148.7, 147.4, 143.5, 138.3, 138.2, 138.1, 133.5, 131.3, 130.2, 129.8, 129.5, 128.9, 128.7, 128.6, 128.3, 127.0, 126.6, 126.4, 121.7, 121.1, 120.1, 118.7, 118.0, 115.4, 111.1, 110.4, 82.3, 59.0, 53.9, 50.3, 49.9, 44.7, 44.1, 43.3, 38.3, 37.0, 29.8, 29.6, 29.5, 27.9, 27.1, 26.2, 23.5, 12.5, 11.1. HRMS (ESI): Calcd. for C51H53N2O4 [M+H]+: 757.4000; found: 757.3983.

(53) (1S,4R)-N-((6a-cis)-12-benzyl-5-ethyl-5,6,6a,7,12,12a-hexahydrodibenzo[*b*,*h*][1,6]naphthyr-idin-9-yl)-4,7,7-trimethyl-3-oxo-2-oxabicyclo[2.2.1]heptane-1-carboxamide (**C53**)

Yellow solid; m.p. : 88-90 ºC, (85.7 mg, 78% yield); 1H NMR (500 MHz, CDCl3) δ 7.89 (s, 1H), 7.30 – 7.14 (m, 6H), 7.09 – 7.01 (m, 2H), 6.93 (d, *J* = 9.6 Hz, 1H), 6.57 – 6.44 (m, 3H), 4.91 (d, *J* = 17.2 Hz, 1H), 4.49 (d, *J* = 3.4 Hz, 1H), 4.42 (d, *J* = 17.2 Hz, 1H), 3.56 – 3.41 (m, 1H), 3.37 – 3.30 (m, 2H), 3.25 (dd, *J* = 11.6, 6.0 Hz, 1H), 2.92 – 2.81 (m, 1H), 2.72 – 2.64 (m, 1H), 2.61 – 2.48 (m, 2H), 2.01 – 1.86 (m, 2H), 1.74 – 1.61 (m, 1H), 1.17 – 1.11 (m, 9H), 0.93 (s, 3H) 13C NMR (126 MHz, CDCl3) δ 178.2, 164.6, 143.7, 141.2, 139.2, 128.7, 128.5, 126.7, 126.6, 126.2, 122.1, 121.6, 121.4, 119.7, 115.2, 112.5, 110.3, 92.6, 58.5, 55.5, 54.2, 54.0, 50.4, 44.6, 30.5, 29.8, 29.6, 29.2, 16.8, 16.6, 11.1, 9.8. HRMS (ESI): Calcd. for C35H40N3O3 [M+H]+: 550.3064; found: 550.3058.

(54) (6a-*cis*)-5,6,6a,7,12,12a-hexahydrodibenzo[*b*,*h*][1,6]naphthyridine (**C54**)

Yellow solid; m.p. : 128-130 ºC, (35.4 mg, 75% yield); 1H NMR (400 MHz, CDCl3) δ 7.21 – 7.12 (m, 2H), 7.07 – 7.00 (m, 2H), 6.74 – 6.66 (m, 2H), 6.59 (d, *J* = 8.0 Hz, 1H), 6.47 (d, *J* = 8.2 Hz, 1H), 4.41 (d, *J* = 3.0 Hz, 1H), 4.02 (s, 1H), 3.86 (s, 1H), 3.37 (t, *J* = 11.4 Hz, 1H), 3.24 (dd, *J* = 16.8, 6.2 Hz, 1H), 3.16 (dd, *J* = 11.3, 4.2 Hz, 1H), 2.69 (dd, *J* = 16.9, 2.6 Hz, 1H), 2.50 – 2.40 (m, 1H). 13C NMR (101 MHz, CDCl3) δ 143.8, 141.8, 129.5, 129.3, 129.0, 127.1, 122.1, 118.6, 117.1, 116.6, 114.1, 113.8, 50.6, 41.9, 29.8, 29.1. HRMS (ESI): Calcd. for C16H17N2 [M+H]+: 237.1386; found: 237.1382.

(55) (*cis*)-5-benzyl-12-ethyl-10b-methyl-4b,5,6,10b,11,12-hexahydrodibenzo[*c*,*h*][1,6]naphthyri-dine (**D1**)

Brown solid; m.p. : 140-142 ºC, (61.1mg, 83% yield); 1H NMR (400 MHz, CDCl3) δ 7.44 (d, *J* = 7.8 Hz, 1H), 7.32 – 7.24 (m, 5H), 7.23 – 7.13 (m, 4H), 6.98 (d, *J* = 7.6 Hz, 1H), 6.72 (d, *J* = 8.4 Hz, 1H), 6.65 (t, *J* = 7.2 Hz, 1H), 4.06 (d, *J* = 11.2 Hz, 1H), 3.98 (d, *J* = 13.4 Hz, 1H), 3.89 (d, *J* = 15.4 Hz, 1H), 3.67 – 3.57 (m, 2H), 3.42 (s, 1H), 3.35 (dt, *J* = 14.4, 7.2 Hz, 1H), 3.19 (d, *J* = 13.4 Hz, 1H), 2.94 (dd, *J* = 11.0, 1.4 Hz, 1H), 1.28 (s, 3H), 1.23 (t, *J* = 12.0, 4.0 Hz, 3H). 13C NMR (101 MHz, CDCl3) δ 143.6, 141.4, 140.8, 135.0, 133.9, 129.1, 128.3, 128.1, 126.5, 126.5, 126.4, 126.3, 126.1, 118.8, 114.3, 110.5, 68.0, 58.0, 57.1, 55.6, 44.8, 36.6, 22.7, 11.0. HRMS (ESI): Calcd. for C26H29N2 [M+H]+: 369.2325; found: 369.2323.

(56) (*cis*)-5-benzyl-12-ethyl-9,10b-dimethyl-4b,5,6,10b,11,12-hexahydrodibenzo[*c*,*h*][1,6]naphth-yridine (**D2**)

Brown solid; m.p. : 115-117 ºC, (53.4 mg, 70% yield); 1H NMR (400 MHz, CDCl3) δ 7.29 – 7.12 (m, 8H), 6.99 (d, *J* = 7.6 Hz, 1H), 6.86 (d, *J* = 7.6 Hz, 1H), 6.70 (d, *J* = 8.2 Hz, 1H), 6.63 (t, *J* = 7.2 Hz, 1H), 4.03 (d, *J* = 11.2 Hz, 1H), 3.95 (d, *J* = 13.4 Hz, 1H), 3.84 (d, *J* = 15.2 Hz, 1H), 3.66 – 3.51 (m, 2H), 3.43 – 3.28 (m, 2H), 3.17 (d, *J* = 13.2 Hz, 1H), 2.93 (d, *J* = 11.4 Hz, 1H), 2.38 (s, 3H), 1.26 (s, 3H), 1.21 (t, *J* = 7.0 Hz, 3H).13C NMR (101 MHz, CDCl3) δ 143.6, 141.2, 140.9, 135.6, 133.9, 131.9, 129.0, 128.3, 128.0, 127.0, 126.9, 126.5, 126.4, 118.9, 114.3, 110.4, 68.0, 57.9, 57.1, 55.4, 44.8, 36.5, 22.7, 21.4, 11.0. HRMS (ESI): Calcd. for C27H31N2 [M+H]+: 383.2482; found: 383.2478.

(57) (*cis*)-5-benzyl-9-bromo-12-ethyl-10b-methyl-4b,5,6,10b,11,12-hexahydrodibenzo[*c*,*h*][1,6] naphthyridine (**D3**)

Brown solid; m.p. : 94-96 ºC, 58.9 mg, 66% yield); 1H NMR (500 MHz, CDCl3) δ 7.41 (t, *J* = 2.4 Hz, 1H), 7.15 – 7.09 (m, 5H), 7.08 – 6.98 (m, 3H), 6.69 (d, *J* = 8.2 Hz, 1H), 6.57 (dd, *J* = 8.2, 2.4 Hz, 1H), 6.51 (td, *J* = 7.2, 2.6 Hz, 1H), 3.88 – 3.81 (m, 2H), 3.69 (dd, *J* = 15.4, 2.8 Hz, 1H), 3.50 – 3.42 (m, 1H), 3.38 (dd, *J* = 15.4, 2.6 Hz, 1H), 3.25 – 3.18 (m, 2H), 3.06 (dd, *J* = 13.4, 2.6 Hz, 1H), 2.78 (dt, *J* = 11.2, 1.8 Hz, 1H), 1.12 (d, *J* = 2.4 Hz, 3H), 1.08 (td, *J* = 7.0, 2.2 Hz, 3H). 13C NMR (126 MHz, CDCl3) δ 143.8, 143.6, 140.5, 134.0, 133.8, 129.5, 129.2, 129.2, 128.3, 128.2, 128.2, 126.7, 119.9, 118.4, 114.5, 110.6, 67.6, 57.9, 56.9, 55.0, 44.8, 36.9, 22.8, 11.1. HRMS (ESI): Calcd. for C26H28BrN2 [M+H]+: 447.1430; found: 447.1429.

(58) (*cis*)-5-benzyl-9-chloro-12-ethyl-10b-methyl-4b,5,6,10b,11,12-hexahydrodibenzo[*c*,*h*][1,6] naphthyridine (**D4**)

Yellow solid; m.p. : 96-98 ºC, (59.5 mg, 74% yield); 1H NMR (400 MHz, CDCl3) δ 7.42 (t, *J* = 2.2 Hz, 1H), 7.28 (t, *J* = 3.0 Hz, 4H), 7.25 – 7.18 (m, 3H), 7.15 (dt, *J* = 8.2, 2.0 Hz, 1H), 6.90 (d, *J* = 8.2 Hz, 1H), 6.76 – 6.71 (m, 1H), 6.67 (td, *J* = 7.5, 2.2 Hz, 1H), 4.08 – 3.94 (m, 2H), 3.87 (dd, *J* = 15.4, 2.2 Hz, 1H), 3.67 – 3.52 (m, 2H), 3.44 – 3.33 (m, 2H), 3.22 (dd, *J* = 13.4, 2.2 Hz, 1H), 2.94 (dt, *J* = 11.4, 1.8 Hz, 1H), 1.28 (d, *J* = 2.0 Hz, 3H), 1.24 (td, *J* = 7.2, 2.0 Hz, 3H). 13C NMR (101 MHz, CDCl3) δ 143.6, 143.4, 140.6, 133.8, 133.5, 131.9, 129.3, 128.3, 128.2, 127.9, 126.7, 126.6, 126.3, 118.5, 114.6, 110.6, 67.6, 58.0, 56.9, 55.0, 44.9, 36.9 22.8, 11.1. HRMS (ESI): Calcd. for C26H28ClN2 [M+H]+: 403.1936; found: 403.1935.

(59) (*cis*)-5-benzyl-12-ethyl-9-fluoro-10b-methyl-4b,5,6,10b,11,12-hexahydrodibenzo[*c*,*h*][1,6] naphthyridine (**D5**)

Brown solid; m.p. : 81-83 ºC, (50.2 mg, 65% yield); 1H NMR (400 MHz, CDCl3) δ 7.30 – 7.18 (m, 7H), 7.13 (dt, *J* = 10.6, 2.2 Hz, 1H), 6.96 – 6.83 (m, 2H), 6.73 (d, *J* = 8.2 Hz, 1H), 6.66 (t, *J* = 7.2 Hz, 1H), 4.07 – 3.94 (m, 2H), 3.86 (d, *J* = 15.2 Hz, 1H), 3.69 – 3.51 (m, 2H), 3.43 – 3.30 (m, 2H), 3.21 (dd, *J* = 13.2, 1.6 Hz, 1H), 2.94 (t, *J* = 10.6 Hz, 1H), 1.26 (dd, *J* = 5.8, 1.6 Hz, 3H), 1.23 (dd, *J* = 7.2, 1.4 Hz, 3H).13C NMR (101 MHz, CDCl3) δ 162.7, 160.3, 143.6, 143.5, 140.6, 133.8, 130.6, 130.5, 129.2, 128.3, 128.1, 127.9, 127.8, 126.6, 118.5, 114.5, 113.4, 113.2, 113.1, 112.9, 110.6, 67.6, 57.9, 56.9, 54.9, 44.9, 36.9, 22.8, 11.0. 19F NMR (376 MHz, CDCl3) δ -116.3. HRMS (ESI): Calcd. for C26H28FN2 [M+H]+: 387.2231; found: 387.2229.

(60) (*cis*)-5-benzyl-8-bromo-12-ethyl-10b-methyl-4b,5,6,10b,11,12-hexahydrodibenzo[*c*,*h*][1,6] naphthyridine (**D6**)

Black solid; m.p. : 74-76 ºC, (53.5 mg, 60% yield); 1H NMR (500 MHz, CDCl3) δ 7.29 (dd, *J* = 8.4, 2.2 Hz, 1H), 7.24 – 7.17 (m, 5H), 7.17 – 7.09 (m, 3H), 7.05 (d, *J* = 2.0 Hz, 1H), 6.65 (d, *J* = 8.2 Hz, 1H), 6.59 (tt, *J* = 7.2, 1.4 Hz, 1H), 3.97 – 3.85 (m, 2H), 3.81 – 3.67 (m, 1H), 3.63 – 3.45 (m, 2H), 3.33 (d, *J* = 1.6 Hz, 1H), 3.32 – 3.22 (m, 1H), 3.13 (dd, *J* = 13.2, 1.6 Hz, 1H), 2.84 (dd, *J* = 11.0, 1.6 Hz, 1H), 1.18 (d, *J* = 1.6 Hz, 3H), 1.15 (td, *J* = 7.0, 1.6 Hz, 3H). 13C NMR (126 MHz, CDCl3) δ 143.6, 140.5, 140.4, 137.4, 133.8, 129.4, 129.3, 129.2, 128.3, 128.3, 128.2, 126.7, 119.9, 118.5, 114.6, 110.6, 67.7, 57.9, 56.9, 54.9, 44.9, 36.5, 22.8, 11.0. HRMS (ESI): Calcd. for C26H28BrN2 [M+H]+: 447.1430; found: 447.1425.

(61) (*cis*)-5-benzyl-7-bromo-12-ethyl-10b-methyl-4b,5,6,10b,11,12-hexahydrodibenzo[*c*,*h*][1,6] naphthyridine (**D7**)

Yellow solid; m.p. : 117-119 ºC, (74.0 mg, 83% yield); 1H NMR (400 MHz, CDCl3) δ 7.48 – 7.39 (m, 2H), 7.28 (d, *J* = 3.6 Hz, 4H), 7.23 (dd, *J* = 10.0, 5.6 Hz, 3H), 7.14 (t, *J* = 7.8 Hz, 1H), 6.77 – 6.63 (m, 2H), 4.05 (dd, *J* = 18.2, 11.8 Hz, 3H), 3.62 (dq, *J* = 14.2, 7.0 Hz, 1H), 3.53 – 3.41 (m, 2H), 3.37 (dd, *J* = 14.6, 7.2 Hz, 1H), 3.31 (d, *J* = 13.4 Hz, 1H), 2.97 (dd, *J* = 11.2, 1.4 Hz, 1H), 1.28 (s, 3H), 1.24 (t, *J* = 7.0 Hz, 3H). 13C NMR (101 MHz, CDCl3) δ 144.2, 143.6, 140.4, 134.6, 133.7, 130.3, 129.2, 128.4, 128.1, 127.5, 126.6, 125.7, 122.7, 118.6, 114.6, 110.5, 67.2, 58.0, 56.9, 56.4, 44.9, 37.1, 23.1, 11.1. HRMS (ESI): Calcd. for C26H28BrN2 [M+H]+: 447.1430; found: 447.1429.

(62) (*cis*)-12-ethyl-10b-methyl-5-(4-(4,4,5,5-tetramethyl-1,3,2-dioxaborolan-2-yl)benzyl)-4b,5,6,10b,11,12-hexahydrodibenzo[*c*,*h*][1,6]naphthyridine (**D8**)

Yellow solid; m.p. : 76-78 ºC, (63.2 mg, 64% yield); 1H NMR (400 MHz, CDCl3) δ 7.41 (dd, *J* = 7.8, 1.2 Hz, 1H), 7.29 – 7.14 (m, 9H), 6.95 (d, *J* = 7.4 Hz, 1H), 6.69 (d, *J* = 8.2 Hz, 1H), 6.62 (td, *J* = 7.2, 1.1 Hz, 1H), 4.03 (d, *J* = 11.0 Hz, 1H), 3.95 (d, *J* = 13.2 Hz, 1H), 3.86 (d, *J* = 15.4 Hz, 1H), 3.68 – 3.53 (m, 2H), 3.41 – 3.27 (m, 2H), 3.16 (d, *J* = 13.2 Hz, 1H), 2.96 – 2.82 (m, 1H), 1.25 (s, 3H), 1.20 (t, *J* = 7.0 Hz, 3H). 13C NMR (126 MHz, CDCl3) δ 144.3, 143.6, 141.4, 134.9, 134.6, 133.9, 129.1, 127.8, 126.5, 126.3, 126.3, 126.1, 118.8, 114.3, 110.5, 83.7, 67.9, 58.1, 57.1, 55.7, 44.8, 36.6, 24.9, 22.6, 11.0. HRMS (ESI): Calcd. for C32H40BN2O2 [M+H]+: 495.3177; found: 495.3183.

(63) (*cis*)-12-ethyl-10b-methyl-5-(naphthalen-2-ylmethyl)-4b,5,6,10b,11,12-hexahydrodibenzo[*c*,*h*][1,6]naphthyridine (**D9**)

Brown solid; m.p. : 129-131 ºC, (72.7 mg, 87% yield); 1H NMR (500 MHz, CDCl3) δ 7.63 (dq, *J* = 8.8, 5.2, 4.2 Hz, 2H), 7.57 – 7.49 (m, 2H), 7.32 – 7.19 (m, 4H), 7.06 (tdd, *J* = 10.9, 5.2, 2.7 Hz, 3H), 6.98 (td, *J* = 7.6, 3.3 Hz, 1H), 6.74 (dd, *J* = 7.6, 3.2 Hz, 1H), 6.60 – 6.43 (m, 2H), 3.95 (tt, *J* = 9.0, 4.2 Hz, 2H), 3.73 (dt, *J* = 15.5, 4.4 Hz, 1H), 3.47 (ddd, *J* = 11.0, 7.6, 3.5 Hz, 2H), 3.31 – 3.24 (m, 1H), 3.20 – 3.06 (m, 2H), 2.86 – 2.65 (m, 1H), 1.17 – 1.11 (m, 3H), 1.08 (td, *J* = 7.1, 3.5 Hz, 3H). 13C NMR (126 MHz, CDCl3) δ 143.7, 141.5, 138.4, 135.0, 134.0, 133.4, 132.7, 129.3, 127.8, 127.7, 127.7, 127.0, 126.8, 126.5, 126.4, 126.4, 126.2, 125.9, 125.4, 118.9, 114.5, 110.6, 68.1, 58.3, 57.2, 55.8, 44.9, 36.7, 22.8, 11.1. HRMS (ESI): Calcd. for C30H31N2 [M+H]+: 419.2482; found: 419.2477.

(64) (*cis*)-12-ethyl-10b-methyl-5-(4-(trifluoromethyl)benzyl)-4b,5,6,10b,11,12-hexahydrodibenzo[*c*,*h*][1,6]naphthyridine (**D10**)

Brown solid; m.p. : 91-93 ºC, (74.1 mg, 85% yield); 1H NMR (400 MHz, CDCl3) δ 7.49 (dd, *J* = 18.8, 7.8 Hz, 3H), 7.38 (d, *J* = 7.8 Hz, 2H), 7.32 – 7.25 (m, 1H), 7.23 – 7.11 (m, 3H), 7.01 (d, *J* = 7.6 Hz, 1H), 6.68 (td, *J* = 9.4, 9.0, 6.8 Hz, 2H), 4.13 – 3.95 (m, 2H), 3.88 (dd, *J* = 15.2, 2.2 Hz, 1H), 3.71 (d, *J* = 15.2 Hz, 1H), 3.67 – 3.53 (m, 1H), 3.45 (s, 1H), 3.40 – 3.26 (m, 2H), 2.98 (dt, *J* = 11.2, 1.8 Hz, 1H), 1.30 (d, *J* = 2.0 Hz, 3H), 1.23 (td, *J* = 7.0, 2.0 Hz, 3H). 13C NMR (101 MHz, CDCl3) δ 145.1, 143.6, 141.3, 134.6, 133.8, 129.3, 128.5, 126.5, 126.4, 126.3, 125.0, 124.9, 118.4, 114.4, 110.4, 68.0, 57.5, 57.1, 56.1, 44.8, 36.6, 22.7, 11.1. 19F NMR (376 MHz, CDCl3) δ -62.20, -62.21, -62.23. HRMS (ESI): Calcd. for C27H28F3N2 [M+H]+: 437.2199; found: 437.2198.

(65) (*cis*)-12-ethyl-10b-methyl-5-(4-(methylsulfonyl)benzyl)-4b,5,6,10b,11,12-hexahydrodibenzo[*c*,*h*][1,6]naphthyridine (**D11**)

Brown solid; m.p. : 114-116 ºC, (63.3 mg, 71% yield); 1H NMR (400 MHz, CDCl3) δ 7.78 (d, *J* = 8.0 Hz, 2H), 7.43 (t, *J* = 8.7 Hz, 3H), 7.33 – 7.23 (m, 1H), 7.17 (dt, *J* = 14.2, 7.0 Hz, 3H), 7.00 (d, *J* = 7.6 Hz, 1H), 6.62 (t, *J* = 7.6 Hz, 2H), 4.02 (dd, *J* = 12.6, 6.3 Hz, 2H), 3.86 (d, *J* = 15.0 Hz, 1H), 3.75 (d, *J* = 15.2 Hz, 1H), 3.56 (dq, *J* = 14.2, 7.0 Hz, 1H), 3.46 – 3.27 (m, 3H), 3.03 (s, 3H), 2.96 (d, *J* = 11.2 Hz, 1H), 1.26 (s, 3H), 1.19 (t, *J* = 7.0 Hz, 3H). 13C NMR (101 MHz, CDCl3) δ 147.7, 143.6, 141.2, 138.4, 134.4, 133.7, 129.4, 129.0, 127.0, 126.6, 126.5, 126.4, 126.3, 118.3, 114.4, 110.2, 68.0, 57.5, 57.0, 56.4, 44.8, 44.6, 36.5, 22.6, 11.1. HRMS (ESI): Calcd. for C27H31N2O2S [M+H]+: 447.2101; found: 447.2099.

(66) (*cis*)-12-ethyl-5-hexyl-10b-methyl-4b,5,6,10b,11,12-hexahydrodibenzo[*c*,*h*][1,6]naphthyridi-ne (**D12**)

Yellow solid; m.p. : 77-79 ºC, (47.8 mg, 66% yield); 1H NMR (500 MHz, CDCl3) δ 7.27 (dt, *J* = 7.5, 2.1 Hz, 1H), 7.12 – 7.07 (m, 3H), 6.99 – 6.95 (m, 2H), 6.56 – 6.54 (m, 1H), 6.50 – 6.46 (m, 1H), 3.97 – 3.94 (m, 1H), 3.74 (dd, *J* = 11.1, 3.0 Hz, 1H), 3.50 (dd, *J* = 15.3, 2.7 Hz, 1H), 3.43 – 3.35 (m, 1H), 3.23 – 3.15 (m, 1H), 2.75 – 2.72 (m, 1H), 2.56 – 2.50 (m, 1H), 2.11 – 2.04 (m, 1H), 1.22 – 1.17 (m, 1H), 1.11 – 0.92 (m, 12H), 0.73 – 0.69 (m, 3H). 13C NMR (126 MHz, CDCl3) δ 143.7, 141.5, 135.3, 133.8, 128.8, 126.4, 126.3, 126.2, 126.1, 119.1, 114.1, 110.1, 68.1, 56.9, 55.6, 53.0, 44.8, 36.4, 31.6, 27.8, 26.7, 22.7, 22.7, 14.1, 11.0. HRMS (ESI): Calcd. for C25H35N2 [M+H]+: 363.5589; found: 363.5451.

(67) 1-(((*cis*)-12-ethyl-10b-methyl-6,10b,11,12-tetrahydrodibenzo[*c*,*h*][1,6]naphthyridin-5(4b*H*)-yl)methyl)-2-(((*cis*)-12-ethyl-10b-methyl-6,10b,11,12-tetrahydrodibenzo[*c*,*h*][1,6]naphthyridin-5(4b*H*)-yl)methyl)benzene (**D13**)

Yellow solid; m.p. : 133-135 ºC, (55.3 mg, 42% yield); 1H NMR (500 MHz, CDCl3) δ 7.27 (dd, *J* = 7.5, 3.6 Hz, 2H), 7.10 (t, *J* = 8.3 Hz, 2H), 7.06 – 6.89 (m, 10H), 6.74 (ddd, *J* = 17.1, 7.6, 2.6 Hz, 2H), 6.54 (dt, *J* = 7.6, 3.5 Hz, 2H), 6.47 (tt, *J* = 7.1, 3.3 Hz, 2H), 3.89 – 3.59 (m, 6H), 3.47 – 3.32 (m, 4H), 3.26 – 3.09 (m, 4H), 2.97 (td, *J* = 12.6, 3.4 Hz, 2H), 2.75 (ddd, *J* = 21.8, 11.2, 2.9 Hz, 2H), 1.11 (t, *J* = 3.7 Hz, 6H), 1.04 (td, *J* = 7.1, 2.7 Hz, 6H). 13C NMR (126 MHz, CDCl3) δ 143.7, 141.4, 141.4, 140.5, 140.3, 135.1, 135.1, 133.9, 133.8, 129.1, 128.6, 128.1, 127.9, 127.8, 126.5, 126.5, 126.4, 126.3, 126.2, 126.2, 126.1, 118.9, 114.3, 110.4, 110.4, 68.0, 68.0, 58.0, 58.0, 57.1, 55.7, 55.7, 44.8, 44.8, 36.6, 22.7, 22.7, 11.1. HRMS (ESI): Calcd. for C46H51N4 [M+H]+: 658.3887; found: 658.3896.

(68) (*cis*)-5-benzyl-3-methoxy-10b,12-dimethyl-4b,5,6,10b,11,12-hexahydrodibenzo[*c*,*h*][1,6]naphthyridine (**D14**)

Brown solid; m.p. : 128-130 ºC, (49.9 mg, 65% yield); 1H NMR (500 MHz, CDCl3) δ 7.30 (d, *J* = 7.8 Hz, 1H), 7.16 – 7.07 (m, 6H), 7.03 (d, *J* = 7.5 Hz, 1H), 6.84 (d, *J* = 7.6 Hz, 1H), 6.78 (t, *J* = 2.3 Hz, 1H), 6.72 (dt, *J* = 9.0, 2.1 Hz, 1H), 6.53 (d, *J* = 8.8 Hz, 1H), 3.82 (d, *J* = 13.3 Hz, 1H), 3.72 (d, *J* = 12.3 Hz, 5H), 3.53 (d, *J* = 15.4 Hz, 1H), 3.37 (s, 1H), 3.20 (d, *J* = 13.3 Hz, 1H), 2.87 (s, 4H), 1.23 – 1.16 (m, 3H). 13C NMR (126 MHz, CDCl3) δ 150.3, 141.3, 140.7, 140.4, 134.8, 128.3, 128.1, 126.6, 126.5, 126.4, 126.1, 120.6, 118.8, 114.8, 112.0, 67.7, 60.0, 57.6, 56.0, 54.9, 39.3, 37.2, 23.6. HRMS (ESI): Calcd. for C26H29N2O [M+H]+: 385.2274; found: 385.2271.

(69) (*cis*)-5-benzyl-12-ethyl-2,10b-dimethyl-4b,5,6,10b,11,12-hexahydrodibenzo[*c*,*h*][1,6]naphthyridine (**D15**)

Brown solid; m.p. : 110-112 ºC, (61.1 mg, 80% yield); 1H NMR (500 MHz, CDCl3) δ 7.28 (dd, *J* = 7.9, 3.2 Hz, 1H), 7.11 (qq, *J* = 6.0, 3.5, 3.0 Hz, 5H), 7.06 – 6.97 (m, 2H), 6.92 (dd, *J* = 7.6, 3.8 Hz, 1H), 6.81 (dd, *J* = 7.7, 2.8 Hz, 1H), 6.44 – 6.29 (m, 2H), 3.87 (td, *J* = 13.8, 12.6, 4.0 Hz, 2H), 3.73 (dd, *J* = 15.4, 3.8 Hz, 1H), 3.46 (ddt, *J* = 16.0, 14.1, 5.2 Hz, 2H), 3.28 – 3.13 (m, 2H), 3.02 (dd, *J* = 13.4, 3.7 Hz, 1H), 2.77 (dt, *J* = 11.2, 2.4 Hz, 1H), 2.20 (d, *J* = 3.7 Hz, 3H), 1.13 (d, *J* = 3.8 Hz, 3H), 1.07 (dt, *J* = 7.0, 3.9 Hz, 3H). 13C NMR (126 MHz, CDCl3) δ 143.5, 141.6, 140.9, 138.8, 135.1, 133.8, 128.4, 128.1, 126.5, 126.5, 126.4, 126.3, 126.1, 116.1, 115.5, 111.1, 67.7, 58.0, 57.1, 55.6, 44.8, 36.7, 22.8, 21.9, 11.1. HRMS (ESI): Calcd. for C27H31N2 [M+H]+: 383.2482; found: 383.2481.

(70) (*cis*)-5-benzyl-3-(tert-butyl)-12-ethyl-10b-methyl-4b,5,6,10b,11,12-hexahydrodibenzo[*c*,*h*][1,6]naphthyridine (**D16**)

Brown solid; m.p. : 131-133 ºC, (67.8 mg, 80% yield); 1H NMR (400 MHz, CDCl3) δ 7.45 (d, *J* = 7.8 Hz, 1H), 7.34 – 7.15 (m, 9H), 6.99 (d, *J* = 7.4 Hz, 1H), 6.73 – 6.59 (m, 1H), 4.03 – 3.86 (m, 3H), 3.72 – 3.57 (m, 2H), 3.46 (s, 1H), 3.33 (dq, *J* = 14.4, 7.0 Hz, 1H), 3.25 (dd, *J* = 13.2, 1.6 Hz, 1H), 2.94 (d, *J* = 11.0 Hz, 1H), 1.38 (d, *J* = 1.8 Hz, 9H), 1.31 (d, *J* = 1.6 Hz, 3H), 1.22 (td, *J* = 7.0, 1.4 Hz, 3H). 13C NMR (101 MHz, CDCl3) δ 141.7, 141.4, 141.0, 137.1, 135.0, 130.7, 128.4, 128.1, 126.5, 126.5, 126.4, 126.3, 126.1, 125.7, 118.5, 110.1, 68.1, 57.6, 57.1, 55.4, 44.9, 36.8, 33.6, 31.7, 23.2, 11.1. HRMS (ESI): Calcd. for C30H37N2 [M+H]+: 425.2951; found: 425.2950.

(71) (*cis*)-5-benzyl-3-bromo-12-ethyl-10b-methyl-4b,5,6,10b,11,12-hexahydrodibenzo[*c*,*h*][1,6]naphthyridine (**D17**)

Brown solid; m.p. : 95-97 ºC, (49.1 mg, 55% yield); 1H NMR (400 MHz, CDCl3) δ 7.29 (dd, *J* = 7.8, 1.2 Hz, 1H), 7.16 – 6.98 (m, 9H), 6.83 (d, *J* = 7.4 Hz, 1H), 6.58 (d, *J* = 8.2 Hz, 1H), 6.53 – 6.46 (m, 1H), 3.91 (d, *J* = 11.2 Hz, 1H), 3.84 (d, *J* = 13.4 Hz, 1H), 3.75 (d, *J* = 15.4 Hz, 1H), 3.48 (dq, *J* = 14.2, 6.7 Hz, 2H), 3.28 (d, *J* = 1.4 Hz, 1H), 3.20 (dt, *J* = 14.2, 7.0 Hz, 1H), 3.05 (d, *J* = 13.2 Hz, 1H), 2.80 (dd, *J* = 11.2, 1.3 Hz, 1H), 1.14 (s, 3H), 1.08 (t, *J* = 7.0 Hz, 3H). 13C NMR (101 MHz, CDCl3) δ 143.7, 141.4, 140.8, 135.0, 133.9, 129.1, 128.3, 128.1, 126.5, 126.5, 126.4, 126.3, 126.1, 118.8, 114.3, 110.5, 68.0, 58.0, 57.1, 55.6, 44.8, 36.6, 22.7, 11.0. HRMS (ESI): Calcd. for C26H28BrN2 [M+H]+: 447.1430; found: 447.1429.

(72) (*cis*)-5-benzyl-3-chloro-12-ethyl-10b-methyl-4b,5,6,10b,11,12-hexahydrodibenzo[*c*,*h*][1,6]naphthyridine (**D18**)

Brown solid; m.p. : 85-87 ºC, (50.6 mg, 63% yield); 1H NMR (500 MHz, CDCl3) δ 7.28 (d, *J* = 7.6 Hz, 1H), 7.19 – 7.04 (m, 6H), 7.05 – 6.98 (m, 1H), 6.83 (td, *J* = 8.1, 7.1, 2.7 Hz, 2H), 6.77 (ddt, *J* = 11.6, 5.4, 2.8 Hz, 1H), 6.46 (dd, *J* = 9.1, 4.4 Hz, 1H), 3.89 – 3.80 (m, 2H), 3.74 (dd, *J* = 15.5, 3.6 Hz, 1H), 3.54 – 3.36 (m, 2H), 3.25 (d, *J* = 3.5 Hz, 1H), 3.20 – 3.05 (m, 2H), 2.83 – 2.64 (m, 1H), 1.15 – 1.10 (m, 3H), 1.05 (ddt, *J* = 7.1, 4.7, 2.3 Hz, 3H). 13C NMR (126 MHz, CDCl3) δ 141.1, 140.4, 140.3, 134.8, 128.3, 128.2, 126.7, 126.5, 126.4, 126.3, 126.2, 120.0, 120.0, 119.5, 119.3, 115.7, 115.5, 111.2, 111.2, 67.8, 57.9, 57.0, 55.3, 45.2, 36.7, 23.0, 10.8. HRMS (ESI): Calcd. for C26H28ClN2 [M+H]+: 403.1936; found: 403.1935.

(73) (*cis*)-5-benzyl-12-ethyl-3-fluoro-10b-methyl-4b,5,6,10b,11,12-hexahydrodibenzo[*c*,*h*][1,6]naphthyridine (**D19**)

Brown solid; m.p. : 83-85 ºC, (48.6 mg, 63% yield); 1H NMR (500 MHz, CDCl3) δ 7.27 (dd, *J* = 7.9, 3.3 Hz, 1H), 7.08 (dt, *J* = 44.1, 4.0 Hz, 8H), 6.98 (ddd, *J* = 9.0, 4.3, 2.4 Hz, 1H), 6.83 (dd, *J* = 7.6, 2.6 Hz, 1H), 6.46 (dd, *J* = 8.9, 3.2 Hz, 1H), 3.88 (dd, *J* = 11.2, 3.7 Hz, 1H), 3.82 (dd, *J* = 13.3, 3.8 Hz, 1H), 3.75 (dd, *J* = 15.5, 3.7 Hz, 1H), 3.53 – 3.35 (m, 2H), 3.23 – 3.13 (m, 2H), 3.09 (dd, *J* = 13.2, 3.7 Hz, 1H), 2.78 (dq, *J* = 8.9, 3.1, 2.4 Hz, 1H), 1.11 (d, *J* = 3.6 Hz, 3H), 1.06 (td, *J* = 7.0, 3.3 Hz, 3H). 13C NMR (126 MHz, CDCl3) δ 142.3, 140.9, 140.4, 134.8, 132.9, 128.8, 128.4, 128.1, 126.6, 126.5, 126.4, 126.3, 120.4, 118.7, 111.6, 67.7, 58.0, 57.0, 55.7, 45.0, 36.5, 22.7, 10.9. 19F NMR (471 MHz, CDCl3) δ -131.5. HRMS (ESI): Calcd. for C26H28FN2 [M+H]+: 387.2231; found: 387.2230.

(74) (*cis*)-5-benzyl-12-isopropyl-10b-methyl-4b,5,6,10b,11,12-hexahydrodibenzo[*c*,*h*][1,6]naphthyridine (**D20**)

Brown solid; m.p. : 111-113 ºC, (58.8 mg, 77% yield); 1H NMR (400 MHz, CDCl3) δ 7.48 (dd, *J* = 7.8, 1.2 Hz, 1H), 7.35 – 7.13 (m, 9H), 7.01 (d, *J* = 7.4 Hz, 1H), 6.83 (d, *J* = 8.2 Hz, 1H), 6.67 (t, *J* = 7.4 Hz, 1H), 4.32 (p, *J* = 6.6 Hz, 1H), 4.04 (d, *J* = 13.4 Hz, 1H), 3.93 (d, *J* = 15.2 Hz, 1H), 3.80 (d, *J* = 11.2 Hz, 1H), 3.64 (d, *J* = 15.4 Hz, 1H), 3.44 (d, *J* = 1.4 Hz, 1H), 3.23 (d, *J* = 13.2 Hz, 1H), 3.04 (dd, *J* = 11.2, 1.4 Hz, 1H), 1.34 (d, *J* = 6.6 Hz, 3H), 1.30 – 1.25 (m, 6H). 13C NMR (101 MHz, CDCl3) δ 144.3, 141.8, 140.8, 135.1, 134.0, 129.2, 128.4, 128.1, 126.5, 126.5, 126.5, 126.3, 126.2, 119.2, 114.2, 110.5, 68.1, 58.0, 55.6, 49.1, 46.5, 36.2, 22.6, 19.6, 19.0. HRMS (ESI): Calcd. for C27H31N2 [M+H]+: 383.2482; found: 383.2480.

(75) (*cis*)-5-benzyl-12-cyclohexyl-10b-methyl-4b,5,6,10b,11,12-hexahydrodibenzo[*c*,*h*][1,6]naphthyridinee (**D21**)

Brown solid; m.p. : 126-128 ºC, (65.0 mg, 77% yield); 1H NMR (500 MHz, CDCl3) δ 7.29 (dd, *J* = 8.0, 2.8 Hz, 1H), 7.16 – 6.98 (m, 9H), 6.82 (dd, *J* = 7.7, 2.5 Hz, 1H), 6.63 (dd, *J* = 8.5, 3.1 Hz, 1H), 6.47 (dt, *J* = 8.0, 4.5 Hz, 1H), 3.91 – 3.82 (m, 1H), 3.78 – 3.69 (m, 1H), 3.67 – 3.57 (m, 2H), 3.45 (dd, *J* = 15.4, 3.1 Hz, 1H), 3.25 (d, *J* = 3.1 Hz, 1H), 3.10 – 3.00 (m, 1H), 2.91 (dt, *J* = 11.2, 2.3 Hz, 1H), 1.84 – 1.70 (m, 4H), 1.64 – 1.58 (m, 1H), 1.50 – 1.27 (m, 4H), 1.08 (d, *J* = 3.0 Hz, 3H), 1.04 (d, *J* = 3.5 Hz, 1H). 13C NMR (126 MHz, CDCl3) δ 144.2, 141.8, 140.9, 135.1, 134.0, 129.1, 128.4, 128.1, 126.5, 126.5, 126.4, 126.3, 126.1, 119.1, 114.0, 110.4, 68.1, 58.1, 55.8, 55.6, 50.6, 36.3, 30.0, 29.7, 26.4, 26.3, 26.1, 22.6. HRMS (ESI): Calcd. for C30H35N2 [M+H]+: 423.2795; found: 423.2794.

(76) (*cis*)-12-allyl-5-benzyl-10b-methyl-4b,5,6,10b,11,12-hexahydrodibenzo[*c*,*h*][1,6]naphthyridine (**D22**)

Yellow solid; m.p. : 89-91 ºC, (60.8 mg, 80% yield); 1H NMR (400 MHz, CDCl3) δ 7.42 (d, *J* = 7.8 Hz, 1H), 7.30 – 7.13 (m, 9H), 6.97 (d, *J* = 7.6 Hz, 1H), 6.66 (dt, *J* = 7.4, 3.2 Hz, 2H), 5.89 (ddt, *J* = 17.2, 9.8, 4.8 Hz, 1H), 5.35 – 5.09 (m, 2H), 4.14 – 3.82 (m, 5H), 3.61 (d, *J* = 15.4 Hz, 1H), 3.44 (s, 1H), 3.21 (d, *J* = 13.4 Hz, 1H), 2.98 (dd, *J* = 11.2, 1.6 Hz, 1H), 1.30 (s, 3H). 13C NMR (101 MHz, CDCl3) δ 144.1, 141.3, 140.7, 134.9, 133.7, 133.2, 129.1, 128.3, 128.1, 126.5, 126.4, 126.4, 126.3, 126.1, 118.7, 116.0, 114.8, 111.0, 68.0, 58.0, 57.8, 55.7, 53.3, 36.9, 36.6, 22.9. HRMS (ESI): Calcd. for C27H29N2 [M+H]+: 381.2325; found: 381.2323.

(77) (*cis*)-6,13-dibenzyl-14a-methyl-5,6,6a,13,14,14a-hexahydrobenzo[*c*]naphtho[1,2-*h*][1,6]naphthyridine (**D23**)

Brown solid; m.p. : 123-125 ºC, (73.9 mg, 77% yield); 1H NMR (500 MHz, CDCl3) δ 7.94 (dd, *J* = 8.6, 5.7 Hz, 1H), 7.56 (dd, *J* = 8.2, 4.6 Hz, 1H), 7.48 (dd, *J* = 9.1, 4.3 Hz, 1H), 7.41 – 7.34 (m, 1H), 7.26 (dd, *J* = 8.1, 4.0 Hz, 1H), 7.23 – 6.93 (m, 14H), 6.87 (dd, *J* = 7.8, 3.8 Hz, 1H), 4.74 (dd, *J* = 17.4, 4.1 Hz, 1H), 4.52 (dd, *J* = 17.3, 3.9 Hz, 1H), 4.26 (d, *J* = 5.1 Hz, 1H), 4.09 (dd, *J* = 11.4, 5.2 Hz, 1H), 3.92 – 3.78 (m, 2H), 3.63 (dd, *J* = 13.8, 5.7 Hz, 1H), 3.31 (dd, *J* = 13.7, 5.4 Hz, 1H), 3.07 – 2.96 (m, 1H), 1.19 (d, *J* = 4.9 Hz, 3H).13C NMR (126 MHz, CDCl3) δ 142.3, 141.8, 141.2, 138.8, 135.7, 135.1, 129.7, 128.8, 128.7, 128.2, 128.1, 127.1, 127.0, 126.7, 126.7, 126.6, 126.5, 126.4, 126.3, 122.3, 121.2, 114.8, 108.9, 61.0, 58.0, 56.3, 55.2, 55.2, 36.6, 23.2. HRMS (ESI): Calcd. for C35H33N2 [M+H]+: 481.2638; found: 481.2637.

(78) ethyl2-((*cis*)-5-benzyl-10b-methyl-5,6,10b,11-tetrahydrodibenzo[*c*,*h*][1,6]naphthyridin-12(4b*H*)-yl)acetate (**D24**)

Yellow solid; m.p. : 131-133 ºC, (34.9 mg, 41% yield); 1H NMR (500 MHz, CDCl3) δ 7.37 (dd, *J* = 7.9, 1.3 Hz, 1H), 7.28 – 7.10 (m, 9H), 6.92 (d, *J* = 7.6 Hz, 1H), 6.67 (td, *J* = 7.3, 1.1 Hz, 1H), 6.47 (d, *J* = 8.2 Hz, 1H), 4.23 – 4.07 (m, 4H), 3.97 (d, *J* = 17.9 Hz, 1H), 3.90 (d, *J* = 13.3 Hz, 1H), 3.83 (d, *J* = 15.4 Hz, 1H), 3.58 (d, *J* = 15.4 Hz, 1H), 3.45 (s, 1H), 3.20 (d, *J* = 13.3 Hz, 1H), 3.01 (dd, *J* = 10.8, 1.5 Hz, 1H), 1.27 (s, 3H), 1.21 (td, *J* = 7.1, 1.4 Hz, 3H).13C NMR (126 MHz, CDCl3) δ 170.9, 143.6, 141.0, 140.7, 134.9, 133.7, 129.2, 128.4, 128.0, 126.5, 126.3, 126.3, 126.2, 119.2, 115.8, 110.0, 67.7, 60.9, 58.9, 57.8, 55.4, 52.8, 36.9, 23.0, 14.3. HRMS (ESI): Calcd. for C28H31N2O2 [M+H]+: 427.2380; found: 427.2376.

(79) (*cis*)-5-benzyl-10b-methyl-12-phenyl-4b,5,6,10b,11,12-hexahydrodibenzo[*c*,*h*][1,6]naphthyridine (**D25**)

Brown solid; m.p. : 107-109 ºC, (41.6 mg, 50% yield); 1H NMR (500 MHz, CDCl3) δ 7.35 (dt, *J* = 15.5, 7.8 Hz, 3H), 7.29 – 7.21 (m, 7H), 7.20 – 7.13 (m, 3H), 7.10 (td, *J* = 7.3, 1.2 Hz, 1H), 7.00 (ddd, *J* = 8.7, 7.2, 1.5 Hz, 1H), 6.92 (d, *J* = 7.5 Hz, 1H), 6.71 (t, *J* = 7.4 Hz, 1H), 6.67 (d, *J* = 8.3 Hz, 1H), 4.21 (d, *J* = 11.4 Hz, 1H), 4.03 (d, *J* = 13.3 Hz, 1H), 3.86 (d, *J* = 15.4 Hz, 1H), 3.64 (d, *J* = 15.4 Hz, 1H), 3.56 (s, 1H), 3.40 (dd, *J* = 11.4, 1.4 Hz, 1H), 3.32 (d, *J* = 13.3 Hz, 1H), 1.36 (s, 3H). 13C NMR (126 MHz, CDCl3) δ 147.8, 143.8, 140.8, 140.7, 133.5, 129.6, 128.4, 128.2, 126.6, 126.5, 126.4, 126.4, 126.3, 126.2, 124.8, 120.2, 116.8, 114.5, 67.5, 59.7, 57.8, 55.0, 37.6, 23.2. HRMS (ESI): Calcd. for C30H29N2 [M+H]+: 417.2325; found: 417.2324.

(80) (*cis*)-5-benzyl-12-(4-methoxyphenyl)-10b-methyl-4b,5,6,10b,11,12-hexahydrodibenzo[*c*,*h*][1,6]naphthyridine (**D26**)

Brown solid; m.p. : 93-95 ºC, (44.6 mg, 50% yield); 1H NMR (500 MHz, CDCl3) δ 7.25 (d, *J* = 7.8 Hz, 1H), 7.21 (d, *J* = 7.6 Hz, 2H), 7.18 – 7.13 (m, 3H), 7.12 – 7.04 (m, 4H), 7.01 (dd, *J* = 8.0, 6.8 Hz, 1H), 6.92 – 6.82 (m, 4H), 6.61 – 6.54 (m, 1H), 6.42 – 6.38 (m, 1H), 4.21 – 4.06 (m, 1H), 3.96 (d, *J* = 13.4 Hz, 1H), 3.78 (d, *J* = 15.5 Hz, 1H), 3.74 (s, 3H), 3.55 (d, *J* = 15.4 Hz, 1H), 3.45 (s, 1H), 3.27 – 3.14 (m, 2H), 1.29 (d, *J* = 1.1 Hz, 3H).13C NMR (126 MHz, CDCl3) δ 157.3, 144.6, 140.9, 140.8, 140.5, 134.9, 133.6, 128.5, 128.5, 128.3, 128.2, 126.6, 126.5, 126.4, 126.3, 126.1, 119.2, 116.0, 115.0, 113.7, 67.6, 60.1, 57.9, 55.5, 55.3, 37.3, 23.0. HRMS (ESI): Calcd. for C31H31N2O [M+H]+: 447.2431; found: 447.2430.

(81) (*cis*,*cis*)-16,19-dibenzyl-4b,10a-dimethyl-4b,5,7,8,10,10a,15,16,16a,18b,19,20-dodecahydrodiisoquinolino[4,3-*c*:3',4'-*i*]pyrazino[1,2,3,4-*lmn*][1,10]phenanthroline (**D27**)

Brown solid; m.p. : 116-118 ºC, (51.5 mg, 41% yield); 1H NMR (500 MHz, CDCl3) δ 7.28 (dd, *J* = 7.9, 2.9 Hz, 2H), 7.14 (ddt, *J* = 28.0, 22.9, 6.9 Hz, 12H), 7.05 – 6.98 (m, 2H), 6.83 (d, *J* = 7.7 Hz, 2H), 6.48 (d, *J* = 3.7 Hz, 2H), 3.90 (dd, *J* = 13.6, 3.5 Hz, 2H), 3.80 – 3.63 (m, 4H), 3.57 – 3.38 (m, 4H), 3.27 (d, *J* = 3.4 Hz, 2H), 3.24 – 3.06 (m, 4H), 2.74 (d, *J* = 10.8 Hz, 2H), 1.17 (d, *J* = 3.5 Hz, 6H).13C NMR (126 MHz, CDCl3) δ 141.73, 141.19, 135.12, 130.42, 128.39, 128.07, 126.53, 126.47, 126.35, 125.98, 121.17, 116.61, 67.17, 58.59, 57.38, 55.40, 47.32, 36.72, 23.55. HRMS (ESI): Calcd. for C44H45N4 [M+H]+: 629.3639; found: 629.3639.

(82) (*cis*)-6-benzyl-14a-methyl-6,6a,11,12,14,14a-hexahydro-5*H*,10*H*-benzo[*c*]quinolino[1,8-*gh*][1,6]naphthyridine (**D28**)

Brown solid; m.p. : 121-123 ºC, (64.6 mg, 85% yield); 1H NMR (400 MHz, CDCl3) δ 7.44 (dd, *J* = 7.8, 1.2 Hz, 1H), 7.28 (dd, *J* = 8.0, 2.8 Hz, 5H), 7.22 – 7.13 (m, 2H), 7.06 (dd, *J* = 7.6, 1.4 Hz, 1H), 6.98 (d, *J* = 7.6 Hz, 1H), 6.91 (dd, *J* = 7.2, 1.6 Hz, 1H), 6.56 (t, *J* = 7.4 Hz, 1H), 3.99 (d, *J* = 13.4 Hz, 1H), 3.95 – 3.82 (m, 2H), 3.66 (d, *J* = 15.4 Hz, 1H), 3.46 (d, *J* = 1.4 Hz, 1H), 3.39 – 3.17 (m, 3H), 2.91 (dd, *J* = 11.2, 1.6 Hz, 1H), 2.86 – 2.70 (m, 2H), 2.14 – 2.05 (m, 1H), 2.01 – 1.88 (m, 1H), 1.31 (s, 3H). 13C NMR (101 MHz, CDCl3) δ 141.6, 141.4, 141.0, 135.1, 131.4, 128.4, 128.3, 128.0, 126.5, 126.4, 126.3, 126.0, 121.2, 117.6, 114.1, 67.8, 58.6, 57.7, 55.5, 49.7, 36.6, 28.0, 23.2, 21.8. HRMS (ESI): Calcd. for C27H29N2 [M+H]+: 381.2325; found: 381.2324.

(83) (*cis*)-6-benzyl-15a-methyl-6,6a,10,11,12,13,15,15a-octahydro-5*H*-azepino[3,2,1-*ij*]isoquinolino[4,3-*c*]quinoline (**D29**)

Black solid; m.p. : 140-142 ºC, (48.9 mg, 62% yield); 1H NMR (400 MHz, CDCl3) δ 7.41 (d, *J* = 8.0 Hz, 1H), 7.29 – 7.20 (m, 6H), 7.15 (td, *J* = 7.4, 1.2 Hz, 1H), 7.09 (dd, *J* = 7.4, 1.6 Hz, 1H), 7.02 (dd, *J* = 7.4, 1.6 Hz, 1H), 6.96 (d, *J* = 7.6 Hz, 1H), 6.72 (t, *J* = 7.4 Hz, 1H), 4.04 (d, *J* = 13.2 Hz, 1H), 3.91 – 3.76 (m, 2H), 3.60 (d, *J* = 15.6 Hz, 1H), 3.47 (d, *J* = 1.6 Hz, 1H), 3.34 – 3.11 (m, 4H), 2.84 –2.70 (m, 2H), 1.87 – 1.73 (m, 3H), 1.65 – 1.59 (m, 1H), 1.21 (s, 3H).13C NMR (101 MHz, CDCl3) δ 147.0, 141.5, 140.8, 134.8, 131.7, 131.2, 130.8, 128.4, 128.1, 126.6, 126.5, 126.4, 126.3, 126.0, 123.3, 117.7, 68.3, 62.2, 58.0, 56.6, 55.3, 38.4, 35.2, 29.3, 25.6, 23.1. HRMS (ESI): Calcd. for C28H31N2 [M+H]+: 395.2482; found: 395.2480.

(84) (*cis*,*cis*)-5,5'-dibenzyl-12-isopropyl-10b,10'b-dimethyl-4b,4'b,5,5',6,10b,10'b,11,11',12-decahydro-6'*H*-3,12'-bidibenzo[*c*,*h*][1,6]naphthyridine (**D30**)

Brown solid; m.p. : 118-120 ºC, (87.8 mg, 62% yield); 1H NMR (500 MHz, CDCl3) δ 7.40 (dd, *J* = 8.0, 2.4 Hz, 1H), 7.37 – 7.30 (m, 3H), 7.28 – 7.13 (m, 12H), 7.10 – 7.01 (m, 3H), 6.93 (p, *J* = 8.0, 7.4 Hz, 3H), 6.76 (dd, *J* = 7.9, 3.9 Hz, 1H), 6.62 (t, *J* = 7.5 Hz, 1H), 6.48 (td, *J* = 7.6, 2.9 Hz, 1H), 4.26 – 4.17 (m, 2H), 4.12 – 3.94 (m, 2H), 3.90 – 3.77 (m, 2H), 3.74 – 3.61 (m, 2H), 3.59 – 3.49 (m, 2H), 3.39 – 3.25 (m, 3H), 3.20 (ddd, *J* = 12.9, 9.6, 2.8 Hz, 1H), 2.98 (d, *J* = 11.3 Hz, 1H), 1.39 (d, *J* = 2.8 Hz, 3H), 1.28 (dd, *J* = 6.4, 2.9 Hz, 3H), 1.21 (q, *J* = 2.9 Hz, 6H).13C NMR (126 MHz, CDCl3) δ 145.3, 142.3, 141.7, 141.1, 141.0, 140.9, 140.8, 140.7, 135.0, 134.4, 134.3, 133.5, 132.8, 132.7, 128.4, 128.4, 128.4, 128.3, 128.2, 128.1, 126.6, 126.6, 126.5, 126.4, 126.3, 126.3, 126.3, 126.2, 126.1, 120.4, 118.8, 118.6, 115.4, 115.3, 113.7, 113.5, 111.4, 111.4, 67.9, 67.8, 67.7, 60.4, 60.1, 57.9, 57.7, 57.5, 55.4, 55.4, 55.3, 49.0, 46.7, 37.3, 37.2, 36.2, 23.2, 23.2, 22.8, 19.7, 18.8. HRMS (ESI): Calcd. for C51H53N4 [M+H]+: 721.4265; found: 721.4264.

(85) (*cis*)-12-ethyl-10b-methyl-4b,5,6,10b,11,12-hexahydrodibenzo[c,h][1,6]naphthyridine (**D31**)

Brown solid; m.p. : 119-121 ºC, (37.2 mg, 67% yield); 1H NMR (500 MHz, CDCl3) δ 7.30 (d, *J* = 7.5 Hz, 1H), 7.18 – 7.11 (m, 2H), 7.07 (td, *J* = 7.7, 2.2 Hz, 2H), 6.94 (d, *J* = 7.6 Hz, 1H), 6.60 – 6.54 (m, 2H), 4.19 (d, *J* = 15.2 Hz, 1H), 3.93 (d, *J* = 15.5 Hz, 1H), 3.55 – 3.36 (m, 3H), 3.22 (dqd, *J* = 14.3, 7.1, 1.9 Hz, 1H), 2.78 (dt, *J* = 11.6, 1.9 Hz, 1H), 1.14 (d, *J* = 2.3 Hz, 3H), 1.06 (td, *J* = 7.1, 2.0 Hz, 3H).13C NMR (126 MHz, CDCl3) δ 143.5, 141.2, 135.9, 131.6, 128.7, 126.8, 126.6, 126.2, 126.1, 122.5, 115.8, 110.6, 61.4, 55.9, 49.1, 45.3, 35.1, 22.7, 11.1. HRMS (ESI): Calcd. for C19H23N2 [M+H]+: 279.1856; found: 279.1854.

**Cartesian coordinates and absolute energies for all species**

**int-2**

**G +ZPE = -673.153856 a.u**

N -1.27767300 -0.38010100 -1.36049500

C -0.04047000 0.14856100 -1.73654600

C -2.49417800 0.21459100 -1.89810300

C 1.13805100 -0.33430000 -1.33354000

H -0.10564500 1.00088900 -2.40115100

C -1.31468800 -1.57314100 -0.62241400

C -3.35308200 0.96810200 -0.89024500

H -2.18702400 0.90770600 -2.68498200

H -3.10026900 -0.55088200 -2.39409700

C 1.23947300 -1.49716300 -0.38672800

H 2.04531200 0.13997600 -1.68687700

C -0.11122400 -2.16020100 -0.16452100

C -2.53504100 -2.21138100 -0.33779200

C -4.72474800 1.10987300 -1.12370800

C -2.79681200 1.56872900 0.24176400

H 1.95499200 -2.23944300 -0.76319100

H 1.65283700 -1.16966400 0.57964300

C -0.17612100 -3.36938100 0.52650000

C -2.56753600 -3.41275700 0.36385600

H -3.46813300 -1.76748800 -0.65510000

C -5.52408200 1.84339500 -0.24883700

H -5.17151700 0.64104800 -1.99516900

C -3.59511200 2.29975000 1.12071800

H -1.73665800 1.45908000 0.43898500

C -1.38597900 -4.00606900 0.79779400

H 0.75264000 -3.81808300 0.86625100

H -3.52438300 -3.88002800 0.56849200

C -4.96066000 2.44143200 0.87790800

H -6.58626100 1.94196500 -0.44348900

H -3.14932400 2.75813100 1.99659500

H -1.40312600 -4.94291100 1.34220500

H -5.58111400 3.00843800 1.56261300

**B1'**

**G +ZPE = -404.505178 a.u**

C 3.02902400 -1.37459600 0.90282300

C 0.72155100 2.19306900 0.47748400

C 2.78403400 0.96602700 0.54804400

N 3.49308600 -0.29012900 0.40370000

H 3.54719300 -2.30792200 0.72253900

H 2.12892300 -1.35484000 1.50242500

C 1.40629800 3.34989500 0.84350200

H -0.34551600 2.22263400 0.29607800

C 3.48595900 2.11937400 0.89810700

C 4.78265000 -0.31268600 -0.37463000

C 2.78480800 3.31079300 1.05094800

H 0.86874100 4.28311700 0.95878900

H 4.55265600 2.09330900 1.07343800

C 6.00740600 -0.42437600 0.52733100

H 4.79580700 0.59547300 -0.97133200

H 4.71223900 -1.16385800 -1.05071500

H 3.31959900 4.20804900 1.33617900

H 6.89484800 -0.45200600 -0.10753700

H 6.09935700 0.42562300 1.20408400

H 5.98353500 -1.34169600 1.11824800

C 1.40766400 0.99208300 0.32459300

H 0.88519500 0.09948800 0.00406900

**int-3a**

**G +ZPE = -1077.649035 a.u**

N -0.22118100 1.52966300 11.87934900

C 0.52991300 1.95017900 13.04118600

C -1.15941100 0.36944300 11.98385900

C 1.13146000 3.21795600 13.01561600

C 0.66124200 1.10536300 14.14398600

H -0.56692500 -0.50778000 12.24298400

H -1.54745800 0.21001000 10.97824900

C -2.28664900 0.57809400 12.97281900

C 1.85466700 3.62402800 14.13499100

C 1.39461300 1.53203000 15.24563900

H 0.21119800 0.12433700 14.15761400

C -2.65189700 -0.47282900 13.81843900

C -3.01307700 1.77158200 13.01267200

H 2.32464300 4.60065500 14.12937700

C 1.98611400 2.79285500 15.24483800

H 1.50061300 0.87573300 16.10015000

H -2.09560500 -1.40378700 13.79498300

C -3.72964400 -0.33491500 14.69108800

C -4.08310300 1.91253100 13.89299700

H -2.75181300 2.59529200 12.35878100

H 2.55560900 3.12640300 16.10388000

H -4.00358100 -1.15799400 15.34063600

C -4.44520700 0.85984100 14.73278600

H -4.63624200 2.84415100 13.91914800

H -5.27937500 0.97108500 15.41567800

C 0.90759200 3.22830400 10.53411300

C 0.97095400 4.09115900 11.79954700

H 0.05624600 4.68809300 11.87359400

H 1.80245700 4.79286400 11.72318000

C 0.70022500 4.02741000 9.22907500

H 0.65663100 3.31956400 8.38747400

H 1.60579100 4.61858800 9.08414500

N -0.42723800 4.95699300 9.27299700

C -0.24521300 6.11225200 8.36379400

H 0.77644600 6.46993100 8.51243400

H -0.32702600 5.80351200 7.30893800

C -1.21558800 7.25625400 8.63911200

H -2.25235200 6.96586300 8.45741300

H -1.13067600 7.59704300 9.67408400

H -0.98376300 8.09653100 7.97955100

C -1.72434700 4.33344800 9.15208900

C -2.69976900 4.60778900 10.11572700

C -2.05049300 3.49167200 8.07896200

C -3.97520700 4.05213700 10.01329300

H -2.44945900 5.26659500 10.93880600

C -3.32135600 2.92860300 7.98340400

H -1.31521200 3.28072900 7.31062800

C -4.28773600 3.20751000 8.95004800

H -4.72189600 4.27808400 10.76589300

H -3.55944700 2.27891000 7.14876000

H -5.27696300 2.77154200 8.87239500

H 1.87848800 2.71732000 10.40935000

C -0.05563300 2.11171800 10.73206000

H -0.62332400 1.71375400 9.89924900

**int-3b**

**G +ZPE = -1077.650149 a.u**

N -3.09934800 0.99066400 12.45182500

C -2.57999300 -0.27107900 11.97734500

C -4.04539800 1.01675900 13.61128600

C -1.48336200 -0.24622200 11.10283600

C -3.17527700 -1.47336200 12.36202500

H -4.91836400 0.42680800 13.33480100

H -4.37280200 2.05178700 13.70456500

C -3.43910800 0.52160200 14.90739100

C -0.99252200 -1.46094100 10.62940100

C -2.66887900 -2.67189000 11.87189000

H -4.02508400 -1.49342000 13.02688800

C -4.17210700 -0.35891700 15.70754300

C -2.19615200 0.97860600 15.35598400

H -0.14580900 -1.45637100 9.95286500

C -1.57597500 -2.66727100 11.00873000

H -3.13279300 -3.60474300 12.16628600

H -5.13982100 -0.71586600 15.37137700

C -3.67139800 -0.77836000 16.93854200

C -1.69158900 0.55089400 16.58143100

H -1.61353800 1.66794400 14.75593800

H -1.18077000 -3.60081400 10.62694700

H -4.25053900 -1.46033700 17.54994800

C -2.42799100 -0.32733600 17.37591700

H -0.72494900 0.90769600 16.91713900

H -2.03403000 -0.65751600 18.32999700

C -1.90981100 2.18104200 10.66743700

C -0.85613700 1.06994700 10.72751300

H -0.09466200 1.34305200 11.46689400

H -0.34800400 0.98264600 9.76780700

C -1.33174200 3.61309100 10.42126800

H -2.10687200 4.34282600 10.67897400

H -1.17045500 3.72317000 9.35201500

N -0.11127200 3.92672000 11.13676800

C -0.28154100 4.44670800 12.49482100

H -1.11851000 3.91144600 12.95182000

H 0.59201500 4.17842500 13.09119500

C -0.54770000 5.95506300 12.57317900

H 0.28544400 6.52765500 12.16093100

H -1.45110800 6.22640100 12.02115700

H -0.68722900 6.25610300 13.61483600

C 1.12488300 4.00464100 10.48775800

C 1.32505000 3.47705300 9.19263700

C 2.24272700 4.59801100 11.11580300

C 2.56723200 3.54676700 8.56977400

H 0.51873600 2.99338200 8.65949100

C 3.48083600 4.65132400 10.48298200

H 2.15346200 5.03243900 12.10091200

C 3.66177400 4.13131000 9.20339400

H 2.67453800 3.12706500 7.57533500

H 4.31098900 5.11736300 11.00292000

H 4.62711700 4.17953400 8.71430400

H -2.58911200 1.99599500 9.81759500

C -2.80402500 2.10223900 11.85253200

H -3.29172100 2.99420800 12.22941700

**TS4**

**G +ZPE = -1077.636644 a.u**

N 0.25605600 1.33298800 12.39511800

C -0.21776400 2.36581400 13.25101700

C 0.11263900 -0.08545100 12.76686600

C 0.08665300 3.70957800 12.95279200

C -0.98913800 2.05992600 14.38003200

H 0.44140400 -0.20338200 13.80089500

H 0.82589300 -0.63708600 12.15200500

C -1.27649300 -0.68098700 12.59331400

C -0.39993000 4.70664800 13.79782600

C -1.45320600 3.07420400 15.21089100

H -1.24438900 1.03624400 14.61030000

C -1.77849100 -1.54502600 13.57089000

C -2.04160800 -0.44207500 11.44841900

H -0.16564400 5.74041500 13.56724800

C -1.16313600 4.40471400 14.92225600

H -2.04784200 2.81738500 16.07948800

H -1.19494100 -1.74156500 14.46456200

C -3.02128600 -2.15614400 13.41079700

C -3.28648100 -1.04677900 11.28835300

H -1.66793300 0.21369400 10.67069700

H -1.52639500 5.19882000 15.56344600

H -3.39643100 -2.82173500 14.17975400

C -3.78037000 -1.90602200 12.26945300

H -3.86860300 -0.84961400 10.39539900

H -4.74913600 -2.37580200 12.14471300

C 1.07657700 2.93764300 10.79692800

C 0.97079200 4.07374000 11.77688300

H 0.59262800 4.97986800 11.29421600

H 1.97457400 4.33723900 12.14045000

C -0.85410000 3.16174500 9.47823000

H -1.44505300 2.76444900 10.28596600

H -0.45503100 2.48501600 8.73828500

N -1.04134600 4.42179000 9.12228300

C -0.43474100 4.91987100 7.85297200

H -0.54534800 4.11571100 7.12415900

H -1.05442600 5.74971400 7.51813400

C 1.03032400 5.33902400 7.95432600

H 1.18667200 6.13832600 8.67987100

H 1.67294300 4.49862900 8.21900400

H 1.35029900 5.70506400 6.97615000

C -1.88951100 5.30298100 9.88287700

C -1.57654200 6.66149800 9.98999500

C -3.05038100 4.80657500 10.48419300

C -2.41037100 7.50825200 10.71419000

H -0.68363900 7.06119600 9.52890000

C -3.87267500 5.66112300 11.21244200

H -3.33394300 3.76916000 10.36278200

C -3.55638800 7.01255400 11.33337300

H -2.15591800 8.55798500 10.79717500

H -4.77175900 5.26748200 11.67102500

H -4.20195400 7.67541600 11.89662500

H 1.71859500 3.05554700 9.93482500

C 0.86252900 1.65321900 11.22710000

H 1.14080400 0.80931700 10.60775000

**TS4'**

**G +ZPE =** **-1077.635934 a.u**

N -2.96709400 0.91174600 11.47861200

C -4.08973600 1.58968400 10.93814400

C -2.97764100 -0.54820000 11.66527600

C -4.11665400 3.00027400 10.92771000

C -5.17311600 0.87221800 10.41098900

H -3.91901400 -0.82841800 12.14183900

H -2.19003900 -0.77183400 12.38709500

C -2.76577600 -1.38056600 10.40958500

C -5.23102800 3.64299700 10.38696300

C -6.27401600 1.53956700 9.88529600

H -5.15984700 -0.20742800 10.39500700

C -3.54841800 -2.51875300 10.19518700

C -1.75897900 -1.07330200 9.48995500

H -5.25034100 4.72794600 10.38231700

C -6.30879600 2.93113400 9.86846500

H -7.10004600 0.96449500 9.48385700

H -4.33114700 -2.77347700 10.90260400

C -3.33473300 -3.33085600 9.08204600

C -1.54640000 -1.87946100 8.37395100

H -1.12773500 -0.20645100 9.64620600

H -7.16223600 3.45629400 9.45669200

H -3.95254700 -4.20851100 8.92987800

C -2.33484000 -3.01096900 8.16601000

H -0.76233900 -1.62632700 7.66942400

H -2.16990800 -3.63778500 7.29725900

C -1.78120600 2.98366500 11.81412200

C -2.99428600 3.82161400 11.53303100

H -2.75007800 4.66313400 10.87219000

H -3.34123700 4.29050600 12.46489300

C -0.48881000 3.15639900 9.68910800

H -0.93590900 2.24806500 9.32082300

H 0.42391500 3.10051900 10.25938300

N -0.84008800 4.28454400 9.11619500

C -1.92783500 4.23678000 8.09401000

H -2.65960400 3.51247800 8.45184600

H -2.41531500 5.20886900 8.08470900

C -1.41738400 3.84351100 6.70936900

H -0.67758900 4.54914300 6.32869200

H -0.96864300 2.84828900 6.72498200

H -2.26104200 3.82459400 6.01628800

C -0.19725300 5.53560300 9.42312200

C -0.25492000 6.59319100 8.50904600

C 0.49477200 5.69961400 10.62850200

C 0.38364800 7.79536700 8.79927600

H -0.77542200 6.49172700 7.56791800

C 1.12949900 6.90565300 10.90565100

H 0.53094200 4.90937400 11.36469300

C 1.07903800 7.95855700 9.99451900

H 0.33644600 8.60367600 8.07972900

H 1.65571100 7.02075500 11.84544700

H 1.57252300 8.89688100 10.21628100

H -0.94039600 3.43808800 12.31996000

C -1.87647300 1.62414600 11.87235300

H -1.04916000 1.02885700 12.23835900

**TS5**

**G +ZPE = -1077.635188 a.u**

N 0.89982000 0.71898600 -1.11909900

C 1.65225100 1.63556800 -0.29004400

C 1.61276400 -0.35810100 -1.87381900

C 0.95355000 2.38926300 0.66652800

C 3.03156600 1.76733800 -0.45147900

H 2.29265700 0.12876500 -2.57244200

H 0.84794300 -0.85957700 -2.46622600

C 2.34798600 -1.34217300 -0.98982600

C 1.67804700 3.26530800 1.47047900

C 3.73088700 2.65576600 0.35853500

H 3.56747900 1.19879700 -1.19615300

C 3.64156200 -1.73946000 -1.33835500

C 1.73440400 -1.91273900 0.12871300

H 1.15152000 3.85252200 2.21378900

C 3.05696900 3.39977300 1.32325900

H 4.80076200 2.76162500 0.23117100

H 4.12508400 -1.30550500 -2.20716400

C 4.31445000 -2.69497000 -0.57906900

C 2.41147300 -2.85991200 0.89277900

H 0.72684000 -1.62771600 0.40797900

H 3.60167400 4.08993500 1.95601800

H 5.31686000 -2.99607600 -0.86002400

C 3.70202900 -3.25398900 0.54066500

H 1.92744900 -3.29290700 1.76042000

H 4.22648300 -3.99248600 1.13578600

C -1.13506100 1.94904800 -0.59342800

C -0.53920700 2.21777100 0.79785400

H -0.75288100 1.39367500 1.48095400

H -0.99020300 3.11767000 1.21723500

C -2.66796000 1.86994300 -0.74353400

H -2.86170900 2.01728400 -1.81229700

H -3.06991700 2.75684800 -0.23913300

N -3.41949900 0.66924200 -0.32116300

C -4.56257800 0.39697400 -1.20808300

H -4.95554600 1.36984900 -1.51289300

H -4.25509200 -0.11259800 -2.13604700

C -5.68651400 -0.37922300 -0.52624300

H -5.37216700 -1.38035700 -0.22502500

H -6.03321400 0.15243700 0.36355600

H -6.52883400 -0.48628500 -1.21462700

C -2.79636700 -0.44905200 0.29985400

C -2.47602500 -0.39442400 1.66587000

C -2.58013500 -1.65834700 -0.38223300

C -1.92666100 -1.49445600 2.31842100

H -2.70041800 0.51036400 2.21846100

C -2.05366700 -2.76721200 0.27940300

H -2.84345800 -1.74100300 -1.43032900

C -1.71676400 -2.68975800 1.62927000

H -1.69074700 -1.42718600 3.37456000

H -1.90372200 -3.69238900 -0.26575800

H -1.30858600 -3.55277000 2.14205700

H -0.87244100 2.83447500 -1.20041600

C -0.38257400 0.84951200 -1.25574600

H -0.87460600 0.15033400 -1.92024200

**TS6**

**G +ZPE = -1077.624254 a.u**

N -0.81454500 -0.69134100 -0.83133600

C 0.43736100 -0.19628900 -1.13564700

C -2.00681400 -0.00801200 -1.36173900

C 1.61564600 -1.16274400 -1.09205200

H 0.42318500 0.46497000 -1.99283700

C -0.98132500 -1.98007400 -0.23198600

C -2.82107600 0.87872700 -0.42507300

H -1.68253600 0.59265800 -2.21440900

H -2.66419600 -0.78398500 -1.76472900

C 1.13237200 -2.58890000 -1.38900000

C 2.42257400 -1.11346300 0.23823400

H 2.30878600 -0.85370800 -1.87638400

C 0.29770300 2.41831400 -0.05748200

C 2.48457600 1.27101600 0.12505100

C -0.00593700 -2.96042200 -0.48109100

C -2.11982200 -2.30661200 0.51064000

C -3.83997600 1.64770200 -1.00141800

C -2.62620400 0.95475400 0.95523700

H 0.79572300 -2.63681500 -2.43151300

H 1.96080600 -3.29320200 -1.29212300

N 3.17525800 0.13162700 0.30334000

H 3.12851800 -1.93999900 0.26468900

H 1.76133900 -1.22331000 1.10173500

C 0.92101200 3.57718700 -0.41075400

H -0.77800200 2.38672900 0.04308000

C 3.10771600 2.51512900 -0.16964900

C -0.15977400 -4.23106200 0.06496900

C -2.26813600 -3.59118600 1.03154300

H -2.89252500 -1.57203700 0.68593800

C -4.64437400 2.46882900 -0.21739300

H -4.00333600 1.60317700 -2.07362400

C -3.43105700 1.77960400 1.74385800

H -1.84186500 0.37590400 1.42749600

C 4.64965600 0.07608700 0.29234800

C 2.34077700 3.61793200 -0.44769300

H 0.35085000 4.47308200 -0.62082200

H 4.18417100 2.60000900 -0.18382400

C -1.28493400 -4.55320900 0.82420300

H 0.60061800 -4.98095000 -0.12537500

H -3.15491400 -3.83002600 1.60668100

C -4.44317700 2.53696700 1.16195800

H -5.42628200 3.05795900 -0.68305800

H -3.26135800 1.82601600 2.81351900

C 5.26176800 0.37083400 1.66212500

H 5.02907800 0.76673300 -0.46201700

H 4.92752100 -0.92478100 -0.03705100

H 2.83658100 4.54959900 -0.69599600

H -1.39454500 -5.54819400 1.23894900

H -5.06824900 3.17663500 1.77415000

H 6.35025400 0.30188700 1.59774300

H 5.00410600 1.37480300 2.00662900

H 4.91550000 -0.34870900 2.40709000

C 1.03159800 1.20083200 0.17865800

H 0.64486600 0.57192300 0.97495300

**int-4**

**G +ZPE = -1077.631733 a.u**

N 2.03144700 4.78253400 11.58300400

C 2.50422900 3.89047900 12.65469300

C 0.58105500 4.99602600 11.55055400

C 4.02335600 3.73635300 12.63573500

H 2.21544500 4.30335100 13.62927600

C 2.85913500 5.80047400 11.07100900

C -0.18059800 4.28602300 10.43713700

H 0.16029900 4.69126200 12.51345900

H 0.38418700 6.07035600 11.48592900

C 4.69984800 5.10713500 12.64940500

C 4.44735400 2.89742500 11.43382100

H 4.30681500 3.18794500 13.53932000

C 0.88047400 2.14613300 13.64124300

C 2.73559600 1.32086600 12.13923000

C 4.17901500 5.98220100 11.53723100

C 2.39179900 6.64570600 10.04525500

C -1.57746500 4.21259100 10.51407500

C 0.46151200 3.72796400 9.32942700

H 4.50500600 5.57465600 13.62137400

H 5.78457700 4.99678000 12.57222300

N 3.87396500 1.53869500 11.51642300

H 5.53019300 2.78141700 11.41976200

H 4.14720200 3.36019500 10.48985600

C 0.56363800 0.87813800 13.95311800

H 0.38808700 2.97848000 14.12979200

C 2.24041200 -0.00413400 12.38752000

C 4.97832400 6.97713100 10.97471800

C 3.20152400 7.64407800 9.51378300

H 1.39725300 6.51223300 9.64125100

C -2.31383400 3.59894600 9.50526300

H -2.09040200 4.63740000 11.37146400

C -0.27600700 3.11000600 8.31723700

H 1.54137900 3.77784700 9.25817500

C 4.65293500 0.45682400 10.85983800

C 1.21651600 -0.20118100 13.26230500

H -0.17702700 0.65456800 14.70979000

H 2.73035300 -0.85946200 11.94911900

C 4.50467700 7.81978700 9.97272700

H 5.99249800 7.09393600 11.34405100

H 2.80844400 8.27719700 8.72608400

C -1.66404800 3.04433300 8.40089000

H -3.39422100 3.54883700 9.58156100

H 0.23828300 2.68256700 7.46376600

C 4.14007800 0.13802900 9.45630800

H 4.64095800 -0.42351600 11.50002900

H 5.68386900 0.80328400 10.82049200

H 0.90542700 -1.21772300 13.47414700

H 5.14133500 8.59055400 9.55514300

H -2.23683100 2.56437000 7.61568900

H 4.76495200 -0.64386400 9.01987400

H 3.10925500 -0.22101000 9.47698500

H 4.19002000 1.01519400 8.80864300

C 1.84069300 2.47439300 12.53914000

H 1.19011500 2.51511100 11.64209800

**TS7**

**G +ZPE = -1077.596849 a.u**

N -0.74785900 -0.00087800 -0.68389400

C 0.60986900 0.17397100 -0.98414000

C -1.72731700 0.72835400 -1.53696600

C 1.40084500 -1.03328100 -1.35859900

H 0.76849000 1.01856600 -1.64382400

C -1.11634400 -1.23222600 -0.05749100

C -3.01922500 1.14665100 -0.86855000

H -1.21003500 1.61739400 -1.90143800

H -1.96398000 0.11061800 -2.41104600

C 0.56411800 -2.28469700 -1.55890800

C 2.73727400 -1.40370000 0.08087600

H 2.10348800 -0.82853200 -2.16078800

C 0.75887200 2.15145000 0.90080400

C 2.86066100 0.94106800 0.39882800

C -0.46421200 -2.40802100 -0.46380400

C -2.06077200 -1.27538400 0.97225100

C -4.19360400 0.42170800 -1.09012600

C -3.07506800 2.28365000 -0.05410600

H 0.05903500 -2.20696700 -2.53197500

H 1.19599000 -3.17301900 -1.60817200

N 3.50170200 -0.22255000 0.16590200

H 3.31486400 -2.25670200 -0.25092600

H 2.11334100 -1.61781400 0.94309500

C 1.41731100 3.33903800 0.85754400

H -0.29553900 2.10811200 1.14055700

C 3.52265900 2.20026100 0.36694800

C -0.77767800 -3.61375000 0.16052900

C -2.38136700 -2.49273200 1.57022700

H -2.53370200 -0.36250900 1.30688500

C -5.39382200 0.80814300 -0.49486400

H -4.16789900 -0.45331200 -1.73080700

C -4.27093900 2.67166300 0.54505900

H -2.18196500 2.87867100 0.10113700

C 4.92995600 -0.28507000 -0.22281500

C 2.81449600 3.35340200 0.57950700

H 0.90054100 4.27006200 1.05326200

H 4.58727600 2.25665900 0.19548000

C -1.74161500 -3.66286900 1.16697000

H -0.26777900 -4.51992800 -0.14879400

H -3.11912300 -2.52028400 2.36369100

C -5.43367200 1.93107900 0.32916700

H -6.29519000 0.23376900 -0.67610000

H -4.29826600 3.55608800 1.17143700

C 5.85848400 -0.40161900 0.98474400

H 5.16998600 0.58932600 -0.82638900

H 5.03738700 -1.15457600 -0.87065300

H 3.33676600 4.30245700 0.54650800

H -1.98241500 -4.60744300 1.64066400

H -6.36554100 2.23418100 0.79271700

H 6.89255900 -0.47135900 0.63987700

H 5.77406000 0.46818700 1.63923700

H 5.63031800 -1.29648300 1.56749500

C 1.42065000 0.90023600 0.60044100

H 1.06143300 0.06644100 1.19784600s

**C1**

**G +ZPE =** **-1077.240477 a.u**

N 2.04142500 4.56030600 11.72204200

C 2.65656000 3.83745800 12.86338500

C 0.58004500 4.59348500 11.67754700

C 4.16324400 3.66773900 12.62759300

C 2.08791500 2.45324500 13.08291300

H 2.50901300 4.41963200 13.78499500

C 2.73357200 5.64410000 11.16126900

C -0.05473200 4.07182600 10.39476300

H 0.21267600 3.98003100 12.50060000

H 0.21622400 5.61087900 11.86998600

C 4.83213800 5.03176800 12.46822000

C 4.42119500 2.77750500 11.40713500

H 4.56300900 3.17402300 13.51729800

C 1.17138900 2.20510200 14.10125500

C 2.58252000 1.37751900 12.29802800

C 4.09318500 5.89875200 11.47303800

C 2.09767000 6.50606500 10.24100800

C -1.32098900 4.53189300 10.01646200

C 0.57035200 3.10047100 9.60873200

H 4.85796700 5.52662700 13.44601000

H 5.87554300 4.91430600 12.15834000

N 3.50506400 1.63169400 11.29225500

H 5.45204300 2.40410400 11.47069300

H 4.35731500 3.37888000 10.49583400

C 0.67553700 0.92541300 14.35083000

H 0.83660300 3.03940800 14.71053200

C 2.08839900 0.08396400 12.57079600

C 4.74898500 6.96921600 10.86544700

C 2.77437400 7.57296900 9.65868500

H 1.06938700 6.33270800 9.95875100

C -1.95274100 4.03006300 8.87984600

H -1.81528600 5.29230100 10.61379900

C -0.05869700 2.59994400 8.46885700

H 1.55239100 2.74182600 9.89463900

C 3.96796200 0.54743300 10.42504300

C 1.14206700 -0.12803500 13.56990000

H -0.04674200 0.75729400 15.14053800

H 2.45681900 -0.76985500 12.02004900

C 4.10999900 7.81811500 9.96484300

H 5.79229000 7.13874100 11.11555400

H 2.24714900 8.20938200 8.95599000

C -1.32211100 3.06060800 8.10037900

H -2.93315300 4.40001700 8.60030000

H 0.43980500 1.84731200 7.86737200

C 4.47239500 1.02790700 9.06296500

H 3.12895000 -0.12610600 10.25116800

H 4.75653800 -0.04013400 10.92306900

H 0.78593600 -1.13724700 13.74795600

H 4.64401500 8.64464800 9.51097900

H -1.80898400 2.67172600 7.21305900

H 4.71174600 0.15763100 8.44700900

H 3.70703900 1.61115500 8.54452300

H 5.37595300 1.63528800 9.13883100

**int-6**

**G +ZPE =** **-673.155089 a.u**

C -2.34165300 -0.04883300 -1.47462200

C -0.78792200 -1.34919100 -0.07347700

C -2.70233700 -3.34560700 0.37041000

C -3.11761200 1.04581500 -0.75180100

H -1.40130700 0.35471700 -1.85998400

H -2.92189500 -0.37787600 -2.34273000

C -0.45875600 -2.39572600 0.72452100

H -0.06340700 -0.58340200 -0.32670300

C -1.39035100 -3.50106500 0.87151400

C -3.59062600 -4.41612100 0.39715800

C -4.29911000 1.55036300 -1.30090500

C -2.65729800 1.58044100 0.45763000

H 0.54270200 -2.46940700 1.12740700

C -1.02381300 -4.74194100 1.41858500

C -3.21347100 -5.64517700 0.94412500

H -4.59346000 -4.28822500 0.00079400

C -5.00380400 2.57331700 -0.66546600

H -4.67164200 1.14032000 -2.23430900

C -3.36035700 2.59833300 1.09733300

H -1.74612500 1.19799300 0.90481000

C -1.92751000 -5.80015600 1.46158800

H -0.01688200 -4.87311200 1.80205200

H -3.91802000 -6.46856600 0.96835500

C -4.53588400 3.09982800 0.53627800

H -5.91847400 2.95312600 -1.10692200

H -2.99071400 3.00217200 2.03333300

H -1.62547800 -6.74917200 1.89128300

H -5.08247200 3.89237600 1.03467700

C -3.13909500 -1.97508400 -0.10560800

H -3.91312400 -2.06473600 -0.87252300

H -3.58703500 -1.41513500 0.73451400

N -2.01676600 -1.21628000 -0.66503500

**int-6'**

**G +ZPE =** **-1103.225968 a.u**

C -3.56138300 -0.56324300 1.08327900

N -2.80794200 -0.65587800 -0.19041400

C -3.46223600 -1.81759300 1.91347900

C -3.22706000 0.27978000 -1.27501400

C -1.84300000 -1.49263300 -0.35408700

H -3.17466500 0.30878900 1.61808200

H -4.59929800 -0.34987700 0.82520600

C -4.43810100 -2.08034300 2.87777500

C -2.40437100 -2.70947800 1.72293000

C -3.16407300 1.72904900 -0.84659100

H -4.24474800 0.00171500 -1.55242000

H -2.57470900 0.08518700 -2.12532900

C -1.34809000 -2.39869300 0.69642100

H -1.34445400 -1.47539500 -1.31791200

O -0.67773700 -2.41892800 5.46679900

C -4.35644800 -3.22652100 3.66241500

H -5.26323400 -1.38955400 3.01165400

C -2.34996700 -3.87941600 2.48778000

C -1.92918400 2.35536600 -0.64220900

C -4.34054200 2.46161800 -0.66903200

C -0.02445900 -1.74821800 1.34240500

H -0.98890900 -3.30971700 0.21127600

C -0.57402600 -2.40220100 6.91602700

Mg 0.76275900 -2.66085200 4.06666200

H -1.58091500 -2.63523700 5.19840000

C -3.31230100 -4.13159900 3.46274000

H -5.11460600 -3.42397000 4.41072400

H -1.54803500 -4.58682000 2.31680800

C -1.87547300 3.69149600 -0.25582900

H -1.00790500 1.80144400 -0.78817100

C -4.28635700 3.80138300 -0.28708800

H -5.30174300 1.98737200 -0.83460700

O 0.58243200 -2.62941500 2.19287000

H 0.62794400 -1.48074700 0.49674300

H -0.34215200 -0.80738300 1.82185200

H -1.26784300 -1.66512600 7.31806800

H -0.78891200 -3.39269800 7.31660500

H 0.44727500 -2.11620500 7.15376900

H -3.25860900 -5.03975800 4.05176500

C -3.05447300 4.41648700 -0.07689100

H -0.91516800 4.16916900 -0.10054500

H -5.20497800 4.36096000 -0.15530200

H -3.01108800 5.45765100 0.22102300

**TS8**

**G +ZPE =** **-1103.221757 a.u**

C -3.59398900 -0.63263600 1.08516600

N -2.89327300 -0.70169600 -0.21517300

C -3.43067500 -1.88513700 1.91621800

C -3.31441600 0.27491900 -1.24344000

C -1.94628600 -1.57886100 -0.44475200

H -3.21495500 0.24512100 1.61936200

H -4.65036600 -0.44549700 0.87856100

C -4.29991500 -2.12456900 2.97871600

C -2.39994500 -2.79463800 1.63269100

C -3.18703100 1.71537000 -0.79045800

H -4.35256600 0.05380400 -1.50120800

H -2.70426600 0.08859500 -2.12764400

C -1.48482000 -2.51215400 0.51354100

H -1.47939400 -1.52848400 -1.42250900

O -0.82644200 -2.38181300 5.42737700

C -4.14742700 -3.25896200 3.77654300

H -5.10135900 -1.42360800 3.18646100

C -2.27990900 -3.95246600 2.41087100

C -1.93575500 2.26195500 -0.48268600

C -4.32309100 2.52285400 -0.70058800

C 0.16312200 -1.60538000 1.27731100

H -0.95657700 -3.35934300 0.09025000

C -0.80076700 -2.26747400 6.87588200

Mg 0.68633500 -2.53702800 4.09522000

H -1.71438800 -2.61627300 5.12059600

C -3.13791600 -4.17814600 3.48657500

H -4.82647800 -3.43459000 4.60233100

H -1.50929300 -4.67599200 2.16992000

C -1.82717400 3.59235600 -0.08742800

H -1.04322400 1.64872200 -0.55246300

C -4.21473100 3.85752700 -0.31085500

H -5.29663300 2.10820100 -0.93945600

O 0.67056100 -2.37510400 2.18766700

H 0.72014900 -1.53156200 0.34002000

H -0.31412500 -0.67051000 1.58877200

H -1.49112300 -1.48505700 7.18846400

H -1.06898300 -3.22222400 7.32721700

H 0.21546300 -1.99690300 7.15141400

H -3.03173000 -5.07740300 4.08233100

C -2.96701500 4.39347300 -0.00171800

H -0.85367300 4.00663300 0.14816800

H -5.10400800 4.47393100 -0.24824000

H -2.88069800 5.43001400 0.30308600

**TS9**

**G +ZPE =** **-1103.220292 a.u**

C -2.12269500 0.45767200 -0.55896600

C -0.60969900 -1.26900600 0.21531700

C -2.66624800 -2.91410500 1.22010300

C -2.69540600 1.50866600 0.36576400

H -1.19440600 0.79355500 -1.01955200

H -2.82813500 0.20717400 -1.35190600

H 0.16274100 -0.67779700 -0.26284700

C -1.35930600 -3.39686200 1.28871300

C -3.73666100 -3.74791200 1.55731600

C -4.02946800 1.90531000 0.24242900

C -1.88651900 2.11351400 1.33488200

C -1.13532600 -4.72017400 1.68400600

C -3.50550500 -5.05566700 1.96723700

H -4.75150900 -3.37039100 1.49624800

C -4.55100900 2.89145700 1.07868300

H -4.66156700 1.44776600 -0.51082400

C -2.40910700 3.09403900 2.17284200

H -0.84596400 1.82308800 1.43400900

C -2.20012200 -5.54512100 2.02725600

H -0.12256700 -5.10640400 1.71675200

H -4.34047500 -5.69436100 2.22931300

C -3.74279100 3.48454100 2.04574400

H -5.58601300 3.19441700 0.97280100

H -1.77537000 3.55813000 2.91937200

H -2.01450300 -6.56756900 2.33383600

H -4.14751600 4.25103300 2.69632400

C -2.96034800 -1.50152100 0.78736800

H -3.77699300 -1.47975400 0.06347600

H -3.26138200 -0.87790200 1.63358000

N -1.80985000 -0.82011400 0.15208300

C -0.19872900 -2.50222300 0.92730400

H 0.49326700 -3.02351900 0.25531700

C 0.65807900 -2.09407500 2.17309000

H 0.02862300 -1.54923400 2.88393800

H 0.98822500 -3.01946200 2.65123300

O 1.76104100 -1.30896400 1.77628900

H 1.88812600 -0.27390500 2.24988600

Mg 3.72880900 -1.13049900 2.35629100

O 2.75141200 0.50861100 2.81853700

C 2.86241300 1.88852900 2.52682900

H 2.05848300 2.45015000 3.01738800

H 3.81655700 2.28296500 2.89278200

H 2.80605600 2.08687100 1.44819500

**in-7**

**G +ZPE =** **-1103.228384 a.u**

C -0.57164500 1.99690000 -1.73956600

C 0.84608100 0.94511300 -0.07253800

C -0.77111700 -1.33271400 0.11075500

C -1.98659500 2.44975900 -1.45776700

H 0.14565000 2.79941800 -1.56752700

H -0.47121100 1.66851000 -2.77548100

H 1.34113100 1.90960500 -0.02198200

C 0.31580800 -1.23505400 0.98526800

C -1.76599900 -2.28641200 0.32948300

C -2.95844700 2.37247300 -2.45841500

C -2.32742600 2.98483500 -0.21045400

C 0.39707700 -2.11108700 2.07132500

C -1.67441600 -3.16085600 1.40827600

H -2.61115900 -2.34574400 -0.34725900

C -4.25501700 2.82610800 -2.21837100

H -2.70086500 1.96274600 -3.42906900

C -3.62315200 3.43113800 0.03099400

H -1.58121300 3.05808500 0.57335800

C -0.59025400 -3.07145800 2.27864900

H 1.23685000 -2.05623800 2.75155600

H -2.44631900 -3.90374300 1.56953300

C -4.58899300 3.35365400 -0.97346800

H -5.00041300 2.76517800 -3.00260100

H -3.87836100 3.84485100 0.99959300

H -0.51120600 -3.74715200 3.12209500

H -5.59665500 3.70541800 -0.78501500

C -0.85240300 -0.43228200 -1.09470000

H -0.38890800 -0.89676200 -1.97324600

H -1.88653400 -0.20272000 -1.34752200

N -0.15052600 0.85353800 -0.88390900

C 1.37219100 -0.18266700 0.70589400

H 2.14493500 -0.65782800 -0.00355800

C 2.18968100 0.30824700 1.90356000

H 2.65477600 1.27052600 1.68471800

H 1.57421700 0.40430400 2.79817700

O 3.25167800 -0.65038400 2.19554800

H 3.52190800 -0.55043800 3.11685000

Mg 4.55364700 -1.57466000 0.87567300

O 3.47111600 -1.47308100 -0.65184300

C 3.34291800 -2.06939300 -1.91466900

H 2.46078700 -1.67335500 -2.43984100

H 4.21261600 -1.87142600 -2.55826200

H 3.21958500 -3.16100700 -1.85523100

**TS10**

**G +ZPE =** **-1103.223018 a.u**

C -2.14170400 0.51110900 -1.28738500

C -0.72655100 -0.55513400 0.38200500

C -2.36207100 -2.81516800 0.55749200

C -3.55464500 0.97884000 -1.00870700

H -1.42071600 1.31033000 -1.11280500

H -2.04416700 0.19111900 -2.32699200

H -0.21441700 0.40115400 0.41416000

C -1.26800300 -2.72141200 1.42732800

C -3.35307400 -3.77234400 0.77443100

C -4.52446300 0.92135400 -2.01248700

C -3.89837700 1.49830800 0.24458900

C -1.17866200 -3.61476500 2.50063600

C -3.25446700 -4.65953600 1.84295000

H -4.20263500 -3.82559200 0.10225900

C -5.82016300 1.37745900 -1.77044400

H -4.26620300 0.52249300 -2.98760900

C -5.19256200 1.94832600 0.48837600

H -3.15455000 1.55390100 1.03219800

C -2.16272200 -4.57936200 2.70456500

H -0.33496700 -3.56462300 3.17705700

H -4.02442400 -5.40527600 2.00084500

C -6.15619600 1.88928700 -0.51960100

H -6.56344400 1.32996000 -2.55773700

H -5.44886000 2.34930300 1.46215800

H -2.07566600 -5.26529200 3.53912300

H -7.16308700 2.24233400 -0.32913700

C -2.45128300 -1.90626900 -0.64247700

H -2.00729700 -2.37624900 -1.52954200

H -3.48844800 -1.67149400 -0.87968200

N -1.73795400 -0.63063500 -0.43149100

C -0.23625500 -1.65085000 1.17734800

H 0.63991400 -2.17915700 0.43066300

C 0.56804900 -1.16693900 2.37797400

H 1.00089200 -0.18450300 2.18546700

H -0.04506000 -1.11729300 3.27876100

O 1.67138100 -2.09121300 2.66473600

H 1.94357000 -1.97980000 3.58402100

Mg 2.93737800 -3.03082200 1.34330100

O 1.73342500 -2.83617900 -0.11787200

C 1.55593600 -3.41766100 -1.39517800

H 0.75373800 -2.90242100 -1.93843000

H 2.46776600 -3.32992000 -1.99652600

H 1.28934100 -4.47948600 -1.32754900

**in-7'**

**G +ZPE =** **-1103.235332 a.u**

C -0.53279200 1.94673000 -1.74805800

C 0.86260700 0.92450100 -0.00032100

C -0.76429000 -1.34438900 0.12278200

C -1.94439700 2.44354500 -1.48573800

H 0.18821600 2.75113900 -1.58976800

H -0.44003900 1.62417500 -2.79045200

H 1.39636200 1.86887700 -0.00623200

C 0.28825000 -1.20232500 1.05069600

C -1.72082300 -2.34068300 0.29694500

C -2.91739100 2.39488900 -2.48620200

C -2.28913000 2.95770900 -0.23000800

C 0.37006400 -2.11626600 2.11308400

C -1.63387900 -3.23598200 1.36301500

H -2.53664600 -2.42604500 -0.41359000

C -4.21338200 2.85172300 -2.24010600

H -2.66271100 1.99675500 -3.46301200

C -3.58031400 3.41340700 0.01819900

H -1.54422800 2.99892400 0.55757100

C -0.57779400 -3.12530900 2.26441300

H 1.18218700 -2.04161400 2.82537300

H -2.37910900 -4.01367700 1.48191200

C -4.54731300 3.36026100 -0.98757800

H -4.95907300 2.80552000 -3.02560900

H -3.83357300 3.81118200 0.99441700

H -0.49286400 -3.82010900 3.09229600

H -5.55361200 3.71353600 -0.79360700

C -0.81529400 -0.45322100 -1.09834100

H -0.32493900 -0.94662800 -1.95330700

H -1.85048200 -0.26609200 -1.38897900

N -0.15723800 0.83734800 -0.86667600

C 1.20967400 -0.06133900 0.90118700

H 2.50343200 -0.92131700 -0.43540300

C 2.15556000 0.31813600 1.98820900

H 2.58773700 1.30174000 1.80841900

H 1.66879800 0.31495800 2.96610000

O 3.29681000 -0.63705500 2.14266300

H 3.56778900 -0.63275800 3.06959000

Mg 4.57239400 -1.54616000 0.85213700

O 3.32811700 -1.39329200 -0.68815100

C 3.19962200 -2.04365900 -1.97565100

H 2.73298600 -1.35678900 -2.67870600

H 4.20172100 -2.29033100 -2.31632100

H 2.60029700 -2.95071100 -1.87851500

**in-8**

**G +ZPE =** **-711.669251 a.u**

C -1.94922300 0.37812500 -1.12270100

C -0.73306900 -1.13985900 0.33122200

C -2.70719600 -3.14101900 0.26843900

C -3.12026900 1.19057400 -0.61443700

H -1.01115600 0.92249000 -1.02203000

H -2.08222300 0.12177600 -2.17473300

H 0.01512400 -0.35619600 0.37324400

C -1.56749100 -3.37973000 1.04810100

C -3.74095600 -4.08072800 0.23619500

C -4.25764300 1.35923900 -1.40849700

C -3.06488400 1.80225800 0.64319200

C -1.48725100 -4.56676300 1.79179100

C -3.64735100 -5.25482000 0.97161800

H -4.62061200 -3.88876600 -0.36812500

C -5.32829800 2.12690700 -0.95197400

H -4.30502400 0.89440500 -2.38730100

C -4.13569700 2.56466500 1.10034600

H -2.18382600 1.68921300 1.26584800

C -2.51509900 -5.49705000 1.75274900

H -0.61972300 -4.76481100 2.40802600

H -4.45377400 -5.97752100 0.94041100

C -5.26930400 2.72816000 0.30311000

H -6.20433500 2.25420600 -1.57700000

H -4.08355200 3.03624500 2.07465500

H -2.43802900 -6.40908100 2.33213500

H -6.10085800 3.32523700 0.65899800

C -2.86092300 -1.89499700 -0.56339700

H -2.88452700 -2.13978900 -1.63061500

H -3.79960900 -1.38699300 -0.33068000

N -1.78213300 -0.90734500 -0.38592500

C -0.49949600 -2.36140900 1.06661100

C 0.68614300 -2.44631100 1.70585200

H 1.39842800 -1.63223700 1.66293600

H 0.97718700 -3.31732200 2.27695400

**TS11**

**G +ZPE =** **-1655.607731 a.u**

C -0.52589700 -2.12956200 -1.01355000

C -0.39061100 -1.92254400 1.40656700

C -2.83175100 -3.23124900 1.85643400

C -1.47509600 -1.30573800 -1.85962700

H 0.44190000 -1.63692200 -0.91694400

H -0.36034800 -3.10745600 -1.47137100

H 0.51969100 -1.36638700 1.21581100

C -2.12385100 -2.74456600 2.96725600

C -4.10394600 -3.77923200 2.02449400

C -2.00776800 -1.83761100 -3.03632400

C -1.80240500 0.00440100 -1.49073100

C -2.72159100 -2.81348700 4.23517200

C -4.68068900 -3.85353900 3.28809000

H -4.64506600 -4.15064500 1.16087900

C -2.85388600 -1.07203300 -3.83833200

H -1.75882300 -2.85190200 -3.32926900

C -2.65170800 0.76606300 -2.28847300

H -1.39823300 0.43107100 -0.57880500

C -3.98523600 -3.36736000 4.39584300

H -2.20001100 -2.42604800 5.10137700

H -5.66865300 -4.28189800 3.40741600

C -3.17774900 0.23008400 -3.46485200

H -3.25916400 -1.49458900 -4.75041500

H -2.89977200 1.77945000 -1.99472600

H -4.43064200 -3.41436800 5.38249300

H -3.83640800 0.82610400 -4.08598100

C -2.23271900 -3.20843500 0.47188400

H -1.94286000 -4.21856300 0.15677900

H -2.96038800 -2.84326900 -0.25567500

N -1.03130500 -2.36411800 0.35825400

C -0.80101300 -2.14056700 2.74851000

C 0.04657600 -1.69901000 3.73810400

H 1.03269700 -1.33913500 3.47640100

H -0.09101000 -1.99526900 4.76834000

H -0.36833500 -0.08362100 4.21753800

C -1.37691200 1.70476600 6.82467900

C -1.89270200 2.93862100 6.28221300

C -1.09610000 3.61881000 5.36786100

C 0.17268000 3.07320400 4.97868800

C 0.77412200 1.97561300 5.67146700

C -0.03973300 1.29997300 6.62812700

H -2.01454600 1.11096200 7.46807400

H -1.47229100 4.49971200 4.86374700

H 0.72526400 3.56615200 4.19051800

H 0.33102700 0.41230800 7.12374700

C 2.21142500 1.54584200 5.44775500

H 2.25716300 0.47416400 5.66609700

C 2.72192200 1.76049300 4.01766100

H 3.71725100 1.32193200 3.91621000

H 2.06544700 1.29044200 3.28237200

H 2.80855200 2.82234900 3.77151100

C 3.10818500 2.27270200 6.47194600

H 2.78201800 2.08242700 7.49721400

H 4.14034800 1.92732400 6.37414600

H 3.09423200 3.35355800 6.30440200

C -3.27037700 3.40117200 6.65523900

H -3.98228100 2.57295000 6.63341800

H -3.26210900 3.79534600 7.67677200

H -3.62337900 4.18680600 5.98724300

Ru -1.05668900 1.33137200 4.66510000

Cl -1.61764200 1.48442500 2.30039500

**int-9**

**G +ZPE =** **-712.427423 a.u**

C -2.17742300 0.11607700 -1.33896800

C -0.93868600 -1.13604200 0.38143800

C -2.77972500 -3.23028900 0.33495600

C -3.15024300 1.14311200 -0.77164500

H -1.19741200 0.57512300 -1.49317800

H -2.53612100 -0.20247800 -2.32280700

H -0.22616900 -0.32032800 0.31970700

C -1.62431300 -3.32382700 1.14597100

C -3.59042000 -4.34269900 0.13729000

C -4.30131200 1.49353100 -1.48195800

C -2.91067700 1.75977100 0.46289900

C -1.34786200 -4.55548500 1.76503100

C -3.29997500 -5.56104900 0.75666100

H -4.46870100 -4.25585100 -0.49522800

C -5.19274700 2.44206600 -0.97895400

H -4.50221400 1.02137600 -2.43848200

C -3.79946700 2.70410300 0.97028300

H -2.02479000 1.50087200 1.03264200

C -2.17900900 -5.65832800 1.57776300

H -0.47017800 -4.65473600 2.39259400

H -3.94542500 -6.41808100 0.60202700

C -4.94392800 3.04945500 0.24946700

H -6.08020600 2.70200800 -1.54518600

H -3.59854400 3.17383100 1.92674900

H -1.94411300 -6.59649500 2.06889300

H -5.63489400 3.78553300 0.64453600

C -3.16370700 -1.88029100 -0.22909900

H -3.73894400 -1.99864400 -1.15119400

H -3.81681400 -1.35167700 0.48932700

N -1.97891400 -1.07348600 -0.51674400

C -0.73691800 -2.16437400 1.24562800

C 0.45967600 -2.17977700 2.16108200

H 0.17110100 -2.31259200 3.21021200

H 1.15451500 -2.99367600 1.92014000

H 1.01400100 -1.24155200 2.08846300

**TS12**

**G +ZPE =** **-1116.909685 a.u**

C -2.25981400 -1.37785500 8.61889300

C 0.27711400 -2.48789500 5.98172300

C -1.39639200 -0.85490200 9.60071200

C -3.61039500 -1.56727600 8.90571900

H -0.16448900 -3.48580700 5.90991600

H 1.34669100 -2.61207100 6.15301300

C 0.03066200 -1.72232500 4.69400300

C -1.93108700 -0.52954900 10.85812800

C -4.12983900 -1.22929900 10.15384700

H -4.26375700 -1.98224100 8.14520700

C -0.97523500 -2.12250900 3.81005900

C 0.81330000 -0.60841500 4.36798600

H -1.28275500 -0.13976100 11.63297500

C -3.28398700 -0.70817400 11.13078200

H -5.18321200 -1.37653600 10.36080400

H -1.57966700 -2.99312800 4.04219600

C -1.20492500 -1.41788100 2.62842800

C 0.58608200 0.09700600 3.18906600

H 1.61368500 -0.29660100 5.03097700

H -3.67419600 -0.44735200 12.10780900

H -1.98829600 -1.74067200 1.95233100

C -0.42637600 -0.30538200 2.31725600

H 1.20315600 0.95462100 2.94660100

H -0.60169700 0.24207400 1.39828600

C 0.49170700 -1.34320100 8.13994100

C 0.04003300 -0.71281500 9.29561300

C 0.09875500 1.46367200 8.23010900

H -0.97580000 1.37594400 8.23913200

H 0.62953600 1.16611600 7.34141800

N 0.64428700 2.35693900 9.03859000

C -0.24810700 3.02735300 10.02719200

H -1.01546300 2.30291300 10.29477600

H 0.33066900 3.22619700 10.92701100

C -0.89174900 4.29723200 9.47196500

H -0.14989800 5.04220900 9.18138000

H -1.51136900 4.07049000 8.60182100

H -1.53209600 4.73484400 10.24095400

C 2.03291800 2.71256700 8.96471500

C 2.93348100 1.92542200 8.23390700

C 2.50494000 3.85412400 9.62431900

C 4.27489600 2.28437100 8.15966900

H 2.61203800 1.02375800 7.73273600

C 3.85063500 4.20164100 9.54305700

H 1.84041000 4.48714100 10.19325800

C 4.74307000 3.42348800 8.81135200

H 4.95596800 1.65984800 7.59410700

H 4.19505000 5.09117600 10.05665700

H 5.78929300 3.69745200 8.75230600

H 1.55729900 -1.46592100 7.97946500

N -0.28612100 -1.83617900 7.17704900

C -1.75031700 -1.71813100 7.23522900

H -2.07028400 -0.96057200 6.50887000

H -2.17702900 -2.66852600 6.90055400

C 1.02793800 -0.47247700 10.41031600

H 2.05389400 -0.52874700 10.04311900

H 0.90293300 0.50914600 10.87657500

H 0.91389500 -1.21881700 11.20359100

**TS12'**

**G +ZPE =** **-1116.906388 a.u**

C -1.09765700 2.69140300 -0.16339600

C -3.17542400 -0.04349700 1.53481300

C 0.17928700 2.39304700 0.34365200

C -1.31011400 3.86967300 -0.87846900

H -3.92257400 0.67796100 1.87502600

H -2.85544500 -0.62416700 2.39992900

C -3.76989600 -0.95008100 0.47431100

C 1.22254400 3.30212600 0.10492300

C -0.26437500 4.75838000 -1.11468600

H -2.30335600 4.09432700 -1.25331100

C -4.89267400 -0.55358600 -0.25777900

C -3.20496600 -2.20530400 0.22101400

H 2.21233400 3.09925200 0.49400000

C 1.00581500 4.46993100 -0.61992500

H -0.44221100 5.66861800 -1.67501900

H -5.35300100 0.40850100 -0.05937100

C -5.43285800 -1.38828100 -1.23584700

C -3.74325600 -3.04105700 -0.75424000

H -2.35047200 -2.53874700 0.80021900

H 1.82735300 5.15577900 -0.79161700

H -6.30416700 -1.06827600 -1.79552700

C -4.85733900 -2.63178800 -1.48771000

H -3.29977900 -4.01333300 -0.93564200

H -5.27826100 -3.28286000 -2.24518900

C -0.78920100 0.49719600 1.53656300

C 0.38334100 1.14753300 1.12074800

C 0.92504800 -0.23750400 -0.50029400

H 1.42629600 0.60756000 -0.95115600

H -0.09523100 -0.42696700 -0.80552900

N 1.68536700 -1.30406100 -0.23192100

C 1.07541200 -2.64319300 -0.04284100

H 0.00850100 -2.52714500 -0.23427600

H 1.47930200 -3.29113000 -0.82586500

C 1.29660600 -3.28210600 1.32607900

H 2.34749400 -3.51407000 1.50246400

H 0.93703000 -2.64433200 2.13571600

H 0.74042500 -4.22201800 1.36262100

C 3.12163800 -1.22505000 -0.37506400

C 3.97051000 -1.37052600 0.72318200

C 3.65365700 -1.02396600 -1.65131100

C 5.35090500 -1.31135500 0.53984100

H 3.56042700 -1.50840500 1.71429700

C 5.03384900 -0.95775000 -1.82509000

H 2.98744600 -0.92735900 -2.50056000

C 5.88471900 -1.10387500 -0.73076400

H 6.00715600 -1.41884400 1.39530500

H 5.44160300 -0.79872500 -2.81633700

H 6.95857300 -1.05538000 -0.86719400

H -0.72609300 -0.28065900 2.28959000

N -2.00412200 0.72546900 1.06540100

C -2.26244700 1.74944900 0.04098300

H -2.52149300 1.24271300 -0.89564900

H -3.15081600 2.30903200 0.34921900

C 1.58177700 1.04509400 2.04368600

H 1.58433000 0.09054900 2.57215100

H 2.52593500 1.12411400 1.50341100

H 1.56585500 1.84150100 2.79516300

**int-10a**

**G +ZPE =** **-1116.920512 a.u**

C -2.28080000 -1.24749400 8.16982200

C 1.22138100 -1.82989100 6.71185800

C -2.03134200 -0.25627800 9.12352100

C -3.59277800 -1.56485400 7.80850800

H 1.37259400 -2.87653400 6.98184700

H 2.12637100 -1.27848700 6.96254100

C 0.87524400 -1.69643900 5.24697400

C -3.11868700 0.39535000 9.71867100

C -4.66430800 -0.91204900 8.40594000

H -3.77178900 -2.32738400 7.05836300

C 0.56167900 -2.82893800 4.48982300

C 0.89166900 -0.44145600 4.62800500

H -2.95721600 1.16019700 10.46727700

C -4.42429000 0.06885600 9.36649100

H -5.67889900 -1.16487600 8.12233900

H 0.55760100 -3.80687500 4.95889300

C 0.26110800 -2.70924100 3.13374100

C 0.58772700 -0.32192200 3.27500800

H 1.15122600 0.44146000 5.20120000

H -5.25184300 0.58316800 9.84038700

H 0.02227200 -3.59384700 2.55519000

C 0.27087800 -1.45575200 2.52598200

H 0.60516600 0.65371700 2.80355300

H 0.03800500 -1.36168600 1.47166000

C 0.37073400 -0.39020000 8.47317300

C -0.59442200 0.07736400 9.51017300

C -0.41232300 1.62933100 9.74559900

H -0.90267900 1.86273500 10.69036200

H -0.96493900 2.16628500 8.97493600

N 0.96215000 2.09285400 9.82130100

C 1.47381200 2.38557400 11.17159500

H 1.03883400 1.64939500 11.84698500

H 2.54967800 2.20446600 11.19216700

C 1.15105600 3.79572100 11.67700700

H 1.58693000 4.56354100 11.03493900

H 0.07091200 3.95941600 11.71828900

H 1.55056400 3.92909900 12.68588000

C 1.57337200 2.67282300 8.70172100

C 0.97591300 2.63416100 7.42253800

C 2.84076100 3.29095900 8.79865800

C 1.61310800 3.18607100 6.31211400

H 0.00238700 2.18745000 7.27374400

C 3.46444200 3.83162500 7.68074200

H 3.34801400 3.35651900 9.75012000

C 2.86165700 3.78905500 6.42375500

H 1.11300800 3.14392000 5.35068400

H 4.43640400 4.29752100 7.80121900

H 3.35124100 4.21774200 5.55790600

H 1.36961100 0.03186600 8.49144000

N 0.14411700 -1.31929900 7.61650500

C -1.15424200 -2.01861000 7.53767900

H -1.35356200 -2.20697300 6.48327400

H -1.01145300 -2.99108000 8.02191700

C -0.19023300 -0.70043500 10.80449700

H 0.85170900 -0.51620900 11.07168300

H -0.82924900 -0.37023800 11.62550900

H -0.32829800 -1.77446000 10.67176400

**int-10b**

**G +ZPE = -1116.919487 a.u**

C -3.78689700 2.20812400 7.00870700

C -1.83538200 5.45871700 6.32033800

C -2.84027500 1.45787000 7.71107100

C -5.09654300 1.73751600 6.86998000

H -1.89832900 5.44936600 5.23124400

H -0.80315900 5.66252700 6.60068400

C -2.78316500 6.48099900 6.90529500

C -3.22624000 0.22375700 8.25149400

C -5.46881700 0.51591700 7.41597500

H -5.82343900 2.33270200 6.32797300

C -3.75892600 7.07800700 6.10160900

C -2.67578200 6.86166200 8.24784100

H -2.50699600 -0.38493700 8.78533000

C -4.52648600 -0.24566100 8.10626600

H -6.48562300 0.15932100 7.30303800

H -3.84183500 6.79832100 5.05689600

C -4.62128800 8.03585300 6.63290300

C -3.53931300 7.81532400 8.77902800

H -1.91114400 6.42221000 8.87896500

H -4.80316800 -1.20306800 8.53148600

H -5.37210100 8.49420300 6.00008800

C -4.51432400 8.40308600 7.97239100

H -3.44698500 8.10513700 9.81913500

H -5.18358500 9.14829200 8.38636000

C -1.27040100 3.37755500 7.42912000

C -1.41506900 1.96597700 7.87327000

C -0.96745600 1.90387000 9.38730200

H -0.95045600 0.84916600 9.66188700

H -1.74683200 2.37648600 9.99064500

N 0.33297900 2.52795500 9.64173400

C 0.24484800 3.71111400 10.53109600

H -0.61521800 4.29747500 10.19644400

H 0.03103800 3.40366500 11.56692800

C 1.48849100 4.59233300 10.50163400

H 2.36891700 4.06392200 10.87214000

H 1.70054900 4.93988300 9.48707900

H 1.32989300 5.46631600 11.13860100

C 1.39483700 1.61628500 9.99972400

C 2.59048600 1.64267500 9.27788800

C 1.26832800 0.72239100 11.07077900

C 3.64001700 0.78757200 9.61299100

H 2.68854600 2.33717600 8.45196300

C 2.31395800 -0.13763800 11.40025300

H 0.35122600 0.69818500 11.64942500

C 3.50351700 -0.10721500 10.67262200

H 4.56095800 0.81801000 9.04171800

H 2.20100300 -0.82773700 12.22887400

H 4.31660300 -0.77626600 10.92988600

H -0.32771900 3.85964100 7.66945600

N -2.13165100 4.06188100 6.76999000

C -3.43529700 3.51435200 6.34869000

H -4.18431700 4.27667000 6.56687400

H -3.38799500 3.40706700 5.25984100

C -0.42366600 1.14072600 7.00103500

H 0.59492300 1.51449500 7.10944200

H -0.44714200 0.09987300 7.32831500

H -0.70630000 1.17864500 5.94772300

**TS13**

**G +ZPE =** **-1116.891526 a.u**

C 1.76829500 5.28551000 11.70674900

C -0.46239100 3.94403500 14.07406800

C 2.04903500 4.12493400 10.97816100

C 2.76592900 6.23415200 11.93825500

H 0.49098900 3.84762400 14.60846400

H -0.95478500 2.97017900 14.14378200

C -1.31132200 4.98738600 14.77970400

C 3.34705200 3.93886700 10.48660700

C 4.05060300 6.04243900 11.43973100

H 2.53363900 7.12295000 12.51526300

C -1.11392200 5.18883700 16.15041800

C -2.31110800 5.72040400 14.13298600

H 3.59695300 3.05148100 9.91971700

C 4.33934800 4.88928600 10.71309100

H 4.82129400 6.78189000 11.62354300

H -0.33215800 4.63912900 16.66448200

C -1.90749400 6.08534000 16.86223300

C -3.10123500 6.62484800 14.84170400

H -2.47054600 5.60344900 13.06797300

H 5.33720800 4.72473300 10.32344600

H -1.73997400 6.22593700 17.92401300

C -2.90569100 6.80719400 16.20911400

H -3.86837100 7.18748800 14.32196200

H -3.51994600 7.51053800 16.75938100

C -0.17539700 3.15783300 11.76110600

C 0.92920600 3.11983600 10.67054900

C 0.38112400 3.51150800 9.25012200

H 1.21016500 3.52433800 8.54697500

H -0.03268700 4.52304500 9.27581400

N -0.60739400 2.55320200 8.77411300

C -0.34713300 1.80326800 7.53033700

H 0.72119100 1.87735500 7.33199900

H -0.55918000 0.74638700 7.69838400

C -1.14297500 2.34144000 6.34057600

H -2.21871400 2.26944500 6.51435200

H -0.89407600 3.38692200 6.14596800

H -0.90226000 1.75952700 5.44779400

C -1.64900700 2.29226400 9.58330300

C -1.82661800 3.15442200 10.74049900

C -2.52705600 1.18939500 9.39768300

C -2.91796100 2.85514100 11.63646600

H -1.70267400 4.21139600 10.51531000

C -3.50971000 0.93490200 10.32145300

H -2.42797000 0.54498900 8.53662200

C -3.70872400 1.76013800 11.46180700

H -3.08905800 3.52203500 12.47223900

H -4.15495600 0.07647000 10.17344300

H -4.50143800 1.52835900 12.16149200

H -0.29981300 2.19956900 12.25061400

N -0.19762200 4.19292200 12.65247800

C 0.37328500 5.47691900 12.24824000

H -0.27250300 5.95316700 11.49889900

H 0.38151000 6.14062500 13.11066000

C 1.45412300 1.66742600 10.62615900

H 2.13050300 1.50853900 9.78548700

H 1.98934600 1.43037300 11.54756200

H 0.63294700 0.95619900 10.52328300

**TS14**

**G +ZPE =** **-1116.900475 a.u**

C -3.94088000 2.16963200 7.50306800

C -1.50447100 4.43792100 5.73516400

C -3.08714900 1.19949600 8.03242100

C -5.29244700 1.88595400 7.29437600

H -1.96464800 4.11931500 4.79847600

H -0.42699100 4.30324800 5.65203000

C -1.86362500 5.87256900 6.04618500

C -3.60879000 -0.05771500 8.35416900

C -5.80401100 0.63705800 7.62754200

H -5.94058600 2.64362600 6.86842500

C -2.88697500 6.50773100 5.33627100

C -1.16248400 6.59061300 7.02195300

H -2.96813800 -0.82762200 8.76330000

C -4.95820700 -0.33557700 8.15764800

H -6.85331500 0.42121200 7.46602500

H -3.42482600 5.96710200 4.56498800

C -3.21389500 7.83601200 5.60411800

C -1.49114600 7.91582900 7.29204300

H -0.35005900 6.12190300 7.56543500

H -5.34617600 -1.31393000 8.41523700

H -4.00688700 8.31829500 5.04486600

C -2.51905800 8.54013800 6.58480600

H -0.94072300 8.46306000 8.04823300

H -2.77135600 9.57324600 6.79362400

C -1.19215300 2.59718400 7.29354100

C -1.61018000 1.54952100 8.28791200

C -1.59135300 2.08903300 9.77143800

H -2.00774400 1.24692800 10.33780100

H -2.33069700 2.89452700 9.83504600

N -0.35170000 2.53060600 10.44246800

C -0.42307500 2.26079200 11.88993400

H -1.45886300 2.44072200 12.18834300

H -0.21706800 1.20324200 12.12105800

C 0.47828900 3.17251500 12.71828000

H 1.53567200 3.02015200 12.49389100

H 0.23648100 4.22192700 12.53180300

H 0.32870400 2.96777600 13.78147200

C 0.93502100 2.45777600 9.83762000

C 1.32391900 3.45612800 8.93431400

C 1.86764600 1.46054400 10.16591000

C 2.57728200 3.42707900 8.32389300

H 0.64490100 4.27988600 8.75106900

C 3.12916400 1.44720200 9.57649300

H 1.60248400 0.68681100 10.87638100

C 3.48610300 2.41989800 8.64167600

H 2.85160600 4.20914000 7.62488000

H 3.83343900 0.66633100 9.84125700

H 4.46723700 2.40242800 8.18186600

H -0.16563100 2.60636400 6.94718800

N -1.97835300 3.47251300 6.77828500

C -3.40890900 3.53324300 7.15175700

H -3.49894000 4.23859700 7.98310600

H -3.95012400 3.95795100 6.30829400

C -0.68857100 0.32442000 8.09641600

H 0.36054300 0.61394000 8.09579800

H -0.82853500 -0.39034700 8.90702900

H -0.91193100 -0.17551500 7.15209700

**int-11**

**G +ZPE =** **-1116.893169 a.u**

C 2.06673100 4.73741700 12.30326300

C -1.38665900 4.07597900 13.64661000

C 2.07264900 4.02023400 11.10740200

C 3.16187200 5.54586400 12.62905300

H -1.08513200 3.45617900 14.50731000

H -2.27723900 3.61362600 13.22111300

C -1.78663800 5.45401800 14.14217500

C 3.17830600 4.11418100 10.25188700

C 4.25458100 5.63905900 11.77503500

H 3.15299500 6.10472300 13.55929800

C -1.79021100 5.74615500 15.50815700

C -2.20210600 6.44138800 13.24067400

H 3.19015900 3.54632000 9.32690700

C 4.26424700 4.91730500 10.57964800

H 5.09535400 6.27095200 12.03736100

H -1.46704400 4.99110200 16.21744100

C -2.20199500 6.99743300 15.96909000

C -2.60994700 7.69181400 13.69724700

H -2.20072400 6.22668400 12.17797500

H 5.11437900 4.97943500 9.91022500

H -2.19749900 7.20786200 17.03272000

C -2.61203300 7.97385400 15.06450000

H -2.92968800 8.44666200 12.98740700

H -2.93018900 8.94753000 15.41954400

C -0.07014800 2.86421100 11.89815300

C 0.90088400 3.13685000 10.73598300

H 1.29551200 2.17157200 10.40091600

C 0.10611400 3.72497400 9.56030900

H 0.76080200 4.05814300 8.75966700

H -0.48907200 4.57855000 9.89842000

N -0.77325600 2.67861500 9.01248100

C -0.86888200 2.57263200 7.53712800

H 0.09532400 2.89308000 7.14464700

H -0.98753900 1.52657300 7.26353200

C -1.99782900 3.43182700 6.96925300

H -2.97046900 3.10957800 7.34647300

H -1.85798500 4.48499000 7.22028400

H -2.00348900 3.33834000 5.88140000

C -1.42007700 1.89667400 9.85060600

C -1.39999500 2.24384400 11.32639000

C -2.22088300 0.79246900 9.41285800

C -1.96696100 1.17902000 12.21365600

H -2.13225000 3.07196100 11.34535600

C -2.78583500 -0.05183100 10.31691300

H -2.34929700 0.60085500 8.35893600

C -2.63092100 0.11352600 11.73759300

H -1.84383900 1.31724500 13.28020400

H -3.36048300 -0.89507700 9.95159600

H -3.05258600 -0.62571200 12.40607300

H 0.38206800 2.11314600 12.56390400

N -0.32468600 4.12498500 12.62398200

C 0.91160500 4.60424000 13.25848800

H 0.70223900 5.57364700 13.71292300

H 1.20479400 3.92897300 14.08512900

**D1**

**G +ZPE =** **-1116.507594 a.u**

C 2.21594500 4.66784200 12.32363000

C -1.31919900 3.90791500 13.40918700

C 2.33585500 3.89575600 11.16322000

C 3.27033400 5.50545500 12.70569100

H -1.07721500 3.38199000 14.35010700

H -2.09974600 3.32740700 12.91634500

C -1.87477800 5.28054600 13.74209200

C 3.51246200 3.97306900 10.40712000

C 4.43411500 5.57955300 11.94758400

H 3.17458200 6.10405100 13.60647300

C -2.07172800 5.67126700 15.06912200

C -2.24022700 6.16821900 12.72197900

H 3.60829900 3.36636200 9.51182500

C 4.55750000 4.80660300 10.79156500

H 5.24112100 6.23512400 12.25509500

H -1.78874300 4.99662700 15.87090500

C -2.62433600 6.91599700 15.37560600

C -2.78890600 7.41186200 13.02339400

H -2.08701600 5.87808900 11.68871100

H 5.46282500 4.85300100 10.19681000

H -2.76814800 7.20146100 16.41191300

C -2.98421000 7.79058100 14.35311100

H -3.06762900 8.08672700 12.22134100

H -3.41146200 8.75914700 14.58750200

C 0.24011900 2.67327200 11.89196400

C 1.19680600 2.99912600 10.73145100

H 1.60910400 2.05555900 10.35715800

C 0.39243300 3.65116200 9.59778100

H 1.05289000 3.85219600 8.75099000

H 0.00533900 4.61384600 9.95513300

N -0.68100700 2.78019500 9.12893600

C -1.21477400 3.06784900 7.79960100

H -0.38000700 3.43054900 7.19506800

H -1.54213900 2.13640300 7.33114900

C -2.34936900 4.10051800 7.77741600

H -3.20945900 3.75864000 8.35793500

H -2.01671500 5.05573100 8.19154500

H -2.68109700 4.27435300 6.74985800

C -1.34341500 1.95400400 10.01874300

C -0.90678200 1.83391800 11.36721200

C -2.44087100 1.15807700 9.61072100

C -1.50454000 0.88451000 12.19805300

C -3.03343500 0.24655100 10.47482100

H -2.82935500 1.24359500 8.60572700

C -2.56460300 0.08629500 11.77784100

H -1.12704100 0.78164200 13.21090400

H -3.86829500 -0.34753300 10.11812900

H -3.01478200 -0.63483800 12.44930500

H 0.78055600 2.06640000 12.63911100

N -0.16503700 3.96559600 12.50707100

C 0.98182900 4.56836700 13.19008800

H 0.69737400 5.56664300 13.53065400

H 1.23630700 3.99059800 14.10194000

**TS15**

**G +ZPE =** **-1103.213819 a.u**

N -1.33849200 -0.14475300 -1.46157800

C -0.37389100 0.59367800 -1.99856100

C -2.73937000 0.07290400 -1.88786900

C 0.98800800 0.46099100 -1.68059500

H -0.70509200 1.36751000 -2.68118400

C -1.01926200 -1.16041700 -0.49980200

C -3.62032800 0.81919100 -0.90075500

H -2.68816100 0.62403400 -2.82799900

H -3.16975300 -0.90201200 -2.11919100

C 1.42159600 -0.87370800 -1.12625100

H 1.65088600 0.91129700 -2.41161800

C 0.32853300 -1.50711700 -0.29628000

C -2.03189500 -1.79135900 0.22890900

C -4.96843700 0.46179900 -0.79877200

C -3.14565300 1.89641000 -0.14875100

H 1.69760300 -1.55020200 -1.94565600

H 2.32608100 -0.74214500 -0.52600200

C 0.62455900 -2.48264400 0.65469700

C -1.70923000 -2.76821200 1.16556900

H -3.06747400 -1.51915400 0.08860000

C -5.82810800 1.16950100 0.03885800

H -5.34887700 -0.37363500 -1.37741200

C -4.00320800 2.60031300 0.69456400

H -2.10569800 2.19414700 -0.21427100

C -0.37908300 -3.11446100 1.38481900

H 1.66249000 -2.75203000 0.81691700

H -2.50189500 -3.24908200 1.72554900

C -5.34663600 2.24029700 0.78975500

H -6.87043500 0.88025400 0.10727100

H -3.62108900 3.43240100 1.27461800

H -0.12351800 -3.87057700 2.11739400

H -6.01251900 2.78917100 1.44543500

O 4.37761100 -0.70467500 2.45370100

C 1.32366200 1.81335400 -0.23181900

C 4.69336600 -0.95780700 3.85109500

Mg 3.61950300 0.96293500 1.59000900

H 4.71584000 -1.41831400 1.90015100

O 2.55116700 1.64135600 0.15972400

H 1.12343000 2.71003400 -0.82202300

H 0.52022000 1.54690200 0.46223700

H 4.23863500 -1.89805900 4.15954700

H 5.77407600 -0.98718300 3.98438900

H 4.26932300 -0.13578700 4.42193000

**int-12**

**G +ZPE =** **-1103.225791 a.u**

N -1.37396900 0.03791900 -1.29304000

C -0.39341800 0.76740800 -1.73652300

C -2.75536600 0.29175800 -1.79820400

C 1.00290900 0.59933400 -1.30646900

H -0.65855100 1.55344500 -2.43460200

C -1.13750000 -1.03754300 -0.35553400

C -3.66494700 1.02910800 -0.83309300

H -2.63550700 0.86216600 -2.71945400

H -3.17812400 -0.67508600 -2.06834300

C 1.29727800 -0.86593000 -0.98042100

H 1.64447700 0.94997800 -2.11715300

C 0.18194000 -1.48310700 -0.17648400

C -2.19969200 -1.61870200 0.33788700

C -5.01367000 0.66360200 -0.77615600

C -3.21747100 2.10546500 -0.06288300

H 1.42999900 -1.43516500 -1.90768400

H 2.24110600 -0.92005700 -0.43569200

C 0.40496700 -2.52623100 0.71937500

C -1.94873100 -2.66024400 1.22549100

H -3.21089000 -1.26156600 0.21313500

C -5.90158900 1.36352500 0.03790900

H -5.37228900 -0.16926400 -1.37158500

C -4.10432600 2.79908400 0.75790800

H -2.17857000 2.41234900 -0.09278000

C -0.64725000 -3.11512300 1.41751500

H 1.41870700 -2.88172600 0.86482400

H -2.77316800 -3.10787300 1.76607700

C -5.44795200 2.43150100 0.80955900

H -6.94425000 1.07004100 0.07161100

H -3.74422800 3.62927100 1.35419800

H -0.44996300 -3.92516500 2.10926400

H -6.13609200 2.97319400 1.44787000

O 4.66405500 -0.67971700 2.35806600

C 1.32565900 1.57149900 -0.08505500

C 5.23713200 -0.88534800 3.67782100

Mg 3.89102500 0.98751700 1.49990700

H 4.76868400 -1.47640400 1.82501600

O 2.65989000 1.51052400 0.20911600

H 1.01963900 2.58262100 -0.39346100

H 0.67463200 1.27595500 0.75376300

H 4.72217100 -1.70753600 4.17332400

H 6.30247900 -1.09461300 3.58740500

H 5.08537300 0.03559700 4.23428700

**TS16**

**G +ZPE =** **-1103.21612 a.u**

N -1.38109600 0.38851300 -1.18637800

C -0.51770800 1.30597400 -1.49269400

C -2.76516100 0.47915700 -1.74696900

C 0.87639100 1.31069900 -0.98485800

H -0.86863800 2.10505000 -2.13538100

C -1.02272900 -0.72918400 -0.34000200

C -3.81350500 0.96120200 -0.76171000

H -2.69744400 1.15635700 -2.59823900

H -3.01560100 -0.50727900 -2.13401900

C 1.37852100 -0.12321600 -0.79282900

H 1.48980700 1.82652800 -1.72739000

C 0.34055200 -0.98243500 -0.12057800

C -2.01118300 -1.53684700 0.22444700

C -5.07209500 0.35173400 -0.77133400

C -3.58379800 2.03805000 0.09874800

H 1.62639700 -0.55617200 -1.76854600

H 2.29791700 -0.09860600 -0.20796400

C 0.68556900 -2.06608800 0.68328400

C -1.63873300 -2.61381500 1.02168600

H -3.05934100 -1.33031100 0.07063600

C -6.08547200 0.81077500 0.06744700

H -5.26219800 -0.48354700 -1.43689400

C -4.59491800 2.49021600 0.94372500

H -2.62013700 2.53322900 0.12098000

C -0.29163800 -2.87968500 1.25207400

H 1.73475200 -2.27340100 0.85923900

H -2.40547000 -3.23805600 1.46273400

C -5.84769400 1.87892400 0.92994800

H -7.05622000 0.32950100 0.04944500

H -4.40311300 3.32274100 1.61043300

H -0.00092200 -3.71763700 1.87398900

H -6.63268800 2.23265500 1.58798300

C 0.94655000 2.16604800 0.32638700

H 0.62690100 3.18860500 0.09785900

H 0.26159300 1.75242900 1.07164400

O 2.25267200 2.13626700 0.84637600

H 3.06084700 2.84431000 0.41778800

Mg 3.15011100 3.09458000 2.44478600

O 3.97472800 3.67957100 0.75739600

C 5.25978800 3.69635600 0.16693400

H 5.66712900 2.68433900 0.04237400

H 5.22224000 4.17090300 -0.82087300

H 5.95896400 4.26837100 0.78619200

**int-13**

**G +ZPE =** **-1103.21302 a.u**

N -0.55290900 0.39814700 -0.57991900

C 0.58100000 1.02765200 -0.54800100

C -1.71441100 1.02400900 -1.28356400

C 1.78568900 0.47701100 0.09700400

H 0.61475300 1.98284200 -1.06043800

C -0.69539600 -0.90652900 0.02813500

C -2.85332300 1.38477600 -0.35332300

H -1.31910900 1.91005300 -1.77945100

H -2.03944500 0.33849700 -2.06446600

C 1.40838700 -0.38557200 1.30692400

H 2.27503600 -0.16492300 -0.68453000

C 0.27927500 -1.31814100 0.95013900

C -1.76623100 -1.73358700 -0.31086800

C -4.15990600 1.02183900 -0.68925200

C -2.62825400 2.13577500 0.80492900

H 2.27728000 -0.95143400 1.64088700

H 1.10142800 0.25892900 2.14105800

C 0.14753700 -2.57712800 1.52967700

C -1.87337600 -2.98873600 0.27948600

H -2.51250800 -1.42448400 -1.02652900

C -5.22834800 1.40169300 0.12137500

H -4.34741300 0.44612500 -1.58931400

C -3.69482800 2.50723100 1.61905400

H -1.62221800 2.43599900 1.07737000

C -0.91978900 -3.41048000 1.20149700

H 0.89360300 -2.90634500 2.24369600

H -2.70305000 -3.63145700 0.01367200

C -4.99717400 2.14134600 1.27891300

H -6.23747800 1.11523700 -0.15055700

H -3.50942800 3.08642600 2.51602700

H -1.00266700 -4.38750800 1.66183200

H -5.82635300 2.43265200 1.91302500

C 2.80577400 1.57307200 0.41219100

H 2.93937300 2.24388600 -0.43851400

H 2.51172800 2.15695700 1.28491300

O 4.08117700 0.93693500 0.70268400

H 4.50920700 1.37313700 1.44784400

Mg 5.17217400 -0.18908300 -0.65161300

O 3.75273900 -0.85992300 -1.66683400

C 3.56636500 -1.78462700 -2.70105900

H 4.10742900 -1.50793800 -3.61997400

H 3.89338800 -2.80103200 -2.42902600

H 2.50146600 -1.85599500 -2.97128400

**TS17**

**G +ZPE =** **-1103.221511 a.u**

N -1.34943800 1.39629600 -1.60855200

C -0.20328000 2.04671100 -1.55880100

C -2.49005200 1.99274700 -2.34452100

C 0.96872400 1.56838400 -0.91382600

H -0.17758600 2.98454600 -2.10311600

C -1.47137000 0.09099700 -1.01456300

C -3.64421400 2.39724700 -1.44649000

H -2.09268500 2.86375300 -2.86648300

H -2.81827000 1.29065000 -3.11095000

C 0.70872800 0.54235300 0.18973900

H 1.60437000 0.95927900 -1.85487800

C -0.44842100 -0.36189400 -0.16606400

C -2.56969700 -0.72141800 -1.30365800

C -4.95700800 2.15348200 -1.85787700

C -3.42270100 3.06860300 -0.24015400

H 1.60337100 -0.05579600 0.36831200

H 0.48608900 1.06193300 1.13266200

C -0.55424900 -1.64193900 0.37373100

C -2.65453400 -1.99473400 -0.74756000

H -3.36217100 -0.38061200 -1.95282500

C -6.03290300 2.57523300 -1.07801500

H -5.14200300 1.63336000 -2.79187400

C -4.49703000 3.48379800 0.54280800

H -2.41129800 3.26774900 0.09601500

C -1.64638700 -2.45931000 0.09095000

H 0.23376500 -1.99887800 1.02759600

H -3.51023600 -2.61778600 -0.97664400

C -5.80512100 3.23932500 0.12542400

H -7.04620100 2.37896200 -1.40877700

H -4.31213600 4.00011100 1.47774000

H -1.70729600 -3.45108500 0.52252900

H -6.64027400 3.56278800 0.73581300

C 1.94821800 2.66994800 -0.54745300

H 1.95106300 3.46810400 -1.29214300

H 1.72556400 3.09317600 0.43428900

O 3.29905200 2.11011200 -0.46664800

H 3.81867000 2.61912100 0.16609800

Mg 4.23162100 0.85716600 -1.79037200

O 2.56963300 0.38585400 -2.62013400

C 2.11605800 -0.65527600 -3.46893000

H 2.62323300 -0.61326100 -4.43877400

H 2.28837600 -1.64493000 -3.03011100

H 1.04031200 -0.54789700 -3.65133700

**int-14**

**G +ZPE =** **-1103.234934 a.u**

N -1.40265500 1.18159300 -1.23499900

C -0.20779600 1.85444700 -1.11041700

C -2.40754600 1.68063800 -2.17476700

C 0.79582500 1.49269500 -0.28034800

H -0.12113300 2.74027800 -1.72917000

C -1.55910300 -0.07053800 -0.59767500

C -3.68844900 2.19192600 -1.53181800

H -1.93989100 2.49405400 -2.73342100

H -2.64574600 0.90610400 -2.90978400

C 0.62356200 0.33345400 0.66830500

H 1.46280100 0.67779500 -2.33563000

C -0.56694500 -0.52937500 0.29408400

C -2.67649400 -0.87779000 -0.85876800

C -4.89328600 2.10261000 -2.23540800

C -3.68392900 2.79992400 -0.27383100

H 1.52971900 -0.28100400 0.69515800

H 0.49952700 0.71697400 1.69348100

C -0.71377800 -1.79071000 0.86998400

C -2.80337700 -2.12770800 -0.26013400

H -3.45706900 -0.53484900 -1.52245700

C -6.07117200 2.61737600 -1.69655100

H -4.91177000 1.62492900 -3.21001700

C -4.86176900 3.31106400 0.26882800

H -2.75918600 2.86853900 0.28758100

C -1.81878400 -2.59611400 0.60444100

H 0.05622000 -2.14168200 1.54967000

H -3.67690000 -2.73177500 -0.47648900

C -6.05857700 3.22346900 -0.44116000

H -6.99789100 2.53822300 -2.25366200

H -4.84413700 3.77746400 1.24749000

H -1.90988900 -3.57025300 1.06987000

H -6.97438300 3.61955500 -0.01752600

C 1.99573900 2.35962600 -0.13892000

H 1.96523900 3.21938100 -0.80691300

H 2.12516800 2.71295300 0.88647800

O 3.24752700 1.61822600 -0.45783100

H 3.77232100 1.49431200 0.34097100

Mg 4.01158600 1.09757200 -2.26232200

O 2.20331400 0.56061700 -2.95966800

C 1.73885000 0.14076500 -4.26764100

H 1.08858000 0.90539700 -4.69199300

H 2.61928200 0.01449400 -4.89285600

H 1.20955800 -0.80746700 -4.17945600

**int-15**

**G +ZPE =** **-711.662522 a.u**

N -1.62998900 0.59352100 -1.53496300

C -0.50704900 1.23706600 -1.70994800

C -2.78874100 0.94814200 -2.40081800

C 0.68404700 1.00066700 -0.94853300

H -0.50190400 2.00469600 -2.47371100

C -1.77353100 -0.40963600 -0.51015600

C -3.85001800 1.78332800 -1.70762500

H -2.37352600 1.48620700 -3.25304700

H -3.20770100 0.01904900 -2.78489100

C 0.71806700 -0.19506000 -0.03002400

C -0.65053500 -0.77206700 0.24868200

C -3.01862900 -1.00037500 -0.27707000

C -5.19023300 1.58832200 -2.05503200

C -3.52134200 2.78448800 -0.79006100

H 1.33332500 -0.97380200 -0.49622300

H 1.21306200 0.06302100 0.90832100

C -0.81277600 -1.72683700 1.25012100

C -3.15201400 -1.95598000 0.72306700

H -3.88787700 -0.71801300 -0.85055900

C -6.18705100 2.38506300 -1.49608900

H -5.45713200 0.81336100 -2.76576100

C -4.52013400 3.57482200 -0.22506400

H -2.48970100 2.95500600 -0.50428000

C -2.04945100 -2.31852700 1.49152900

H 0.04834800 -2.01296300 1.84327500

H -4.11954200 -2.40837800 0.90003300

C -5.85433600 3.37880800 -0.57740900

H -7.22196500 2.22395200 -1.77445600

H -4.25339400 4.34464300 0.48954500

H -2.14975600 -3.05937500 2.27531600

H -6.62947500 3.99490200 -0.13693500

C 1.70582700 1.86041900 -1.12259800

H 1.64119700 2.67667700 -1.83180800

H 2.62512700 1.76621100 -0.55708300

**TS18**

**G +ZPE =** **-1655.601004 a.u**

N -1.64301700 -0.60719300 -1.26125800

C -0.61420000 -0.01489600 -1.84598500

C -3.01021100 -0.25048600 -1.70184800

C 0.73244100 -0.26040000 -1.52583000

H -0.85576900 0.72419100 -2.59853400

C -1.44498700 -1.56146200 -0.20905400

C -3.76943900 0.65321900 -0.74529500

H -2.90071800 0.23729300 -2.67110400

H -3.55997400 -1.17532900 -1.87870100

C 1.06659500 -1.41113000 -0.61332800

C -0.13693400 -1.93804500 0.13662300

C -2.54230400 -2.10210300 0.46901800

C -5.15790200 0.51943600 -0.64915600

C -3.13017300 1.65492000 -0.01045400

H 1.48788500 -2.22394500 -1.22129700

H 1.84984800 -1.12639000 0.09388300

C 0.03562700 -2.85214600 1.17465400

C -2.34300900 -3.01933400 1.49482700

H -3.55019400 -1.80745900 0.21857100

C -5.89651500 1.37616400 0.16435300

H -5.66490900 -0.25726100 -1.21219400

C -3.86824600 2.50675200 0.80923800

H -2.05443800 1.77475300 -0.06725700

C -1.05178900 -3.39531000 1.85318700

H 1.04340000 -3.14561400 1.44752500

H -3.20023400 -3.43087400 2.01318000

C -5.25273500 2.37148100 0.89759700

H -6.97227000 1.26075100 0.22936800

H -3.35968000 3.27665500 1.37796300

H -0.89051300 -4.10600500 2.65469700

H -5.82512300 3.03471900 1.53566000

C 1.68932300 0.49743700 -2.15140300

H 1.40692300 1.33477100 -2.77629600

H 2.72052200 0.46412000 -1.82292500

H 2.24037000 -0.38189200 -3.58860900

C 2.40579300 0.01870600 -6.74666900

C 2.56767500 -1.26735900 -7.37929700

C 3.59799400 -2.07414700 -6.90541800

C 4.46025000 -1.61424100 -5.85487600

C 4.45690200 -0.27353500 -5.39283200

C 3.38429400 0.54236100 -5.85320300

H 1.56287500 0.64047000 -7.02125500

H 3.69886800 -3.09180900 -7.26074500

H 5.17869200 -2.31228100 -5.44574500

H 3.26288400 1.54529200 -5.46446000

C 5.50718000 0.28490700 -4.45147600

H 5.03797300 1.11657300 -3.91608500

C 6.00967200 -0.72023000 -3.40730700

H 6.67716700 -0.21584100 -2.70481100

H 5.18220500 -1.15268100 -2.83983000

H 6.57662900 -1.53559400 -3.86504800

C 6.67363700 0.85769300 -5.28166500

H 6.32651200 1.60983500 -5.99430600

H 7.40800200 1.32766000 -4.62266900

H 7.17782700 0.06515200 -5.84227800

C 1.60170300 -1.71965900 -8.43261400

H 0.57283200 -1.50194000 -8.13833800

H 1.79717800 -1.18210900 -9.36609200

H 1.69413000 -2.78842900 -8.62617800

Ru 2.45949800 -1.20954300 -4.98271800

Cl 0.15114200 -1.88286400 -4.65071700

**int-16**

**G +ZPE =** **-712.42951 a.u**

N -1.69003700 0.74896400 -1.50956900

C -0.44133600 1.38082400 -1.56972700

C -2.77370200 1.25227000 -2.34132300

H -0.41533200 2.24149400 -2.22721000

C -1.84390500 -0.40152600 -0.72990600

C -3.86733500 2.01791200 -1.60587800

H -2.32303300 1.91269300 -3.08634100

H -3.22273000 0.42918000 -2.90659900

C 0.59755800 -0.19802900 0.02447900

C -0.74975900 -0.89885900 0.01616100

C -3.07299700 -1.08529100 -0.67416800

C -5.14367500 2.10649000 -2.17130900

C -3.61760400 2.67792000 -0.40037100

H 1.38864900 -0.91125000 -0.25157500

H 0.84953000 0.11371200 1.05038400

C -0.92220500 -2.06158100 0.76655400

C -3.21375300 -2.24188500 0.08575400

H -3.92946700 -0.70911700 -1.21605500

C -6.14826800 2.84595100 -1.55009800

H -5.35375900 1.59088200 -3.10349300

C -4.62229600 3.41565600 0.22512300

H -2.63569800 2.60989500 0.05351900

C -2.13696100 -2.74296500 0.81222600

H -0.07545700 -2.43910000 1.33232400

H -4.17348100 -2.74622700 0.10835400

C -5.89004500 3.50404100 -0.34785600

H -7.13289000 2.90272400 -2.00084400

H -4.41387700 3.92061000 1.16193600

H -2.23962500 -3.64330200 1.40652000

H -6.67115600 4.07619100 0.13978700

C 1.95547100 1.72175500 -1.00866700

H 2.28653200 2.09604800 -0.03131900

H 2.74909900 1.05518500 -1.36980900

H 1.89091500 2.57184000 -1.69168300

C 0.64712600 0.99445500 -0.89505600

**TS19**

**G +ZPE =** **-1116.900602 a.u**

N -1.78125100 0.16510000 1.38393800

C -1.46105400 1.43936400 0.82621000

C -3.17733100 -0.30760100 1.42389300

C -0.15545900 1.94275500 0.97202500

C -2.42694900 2.17934600 0.13475400

H -3.79366100 0.49313700 1.83706300

H -3.20439600 -1.12360000 2.14797600

C -3.76409300 -0.78268400 0.10339200

C 0.14884900 3.17775500 0.40098500

C -2.09975300 3.41492800 -0.41509100

H -3.42851400 1.79580000 0.00701700

C -5.13338000 -0.60816800 -0.12269900

C -3.00090300 -1.44515300 -0.85994200

H 1.15623600 3.56538500 0.50861700

C -0.80816300 3.91758600 -0.28915000

H -2.85815800 3.97551700 -0.94825300

H -5.73827700 -0.09116400 0.61523400

C -5.72859700 -1.09058800 -1.28647100

C -3.59287100 -1.92249100 -2.02801800

H -1.93801700 -1.58827900 -0.70916000

H -0.54655600 4.87523000 -0.72292300

H -6.79091600 -0.94615000 -1.44656700

C -4.95874900 -1.74873300 -2.24422600

H -2.98533000 -2.43094700 -2.76791000

H -5.41852400 -2.11982300 -3.15284900

C 0.52821300 -0.26242500 1.98520800

C 0.88531300 1.19513000 1.77700800

H 1.86582800 1.29327800 1.30367400

H 0.98993400 1.66940700 2.76475400

C 0.98465400 -1.19837200 0.02714400

H 0.58455000 -0.34368900 -0.49936900

H 0.34713400 -2.06231100 0.14305300

N 2.29172200 -1.44174900 -0.10408600

C 2.80703200 -2.82908700 0.06943000

H 2.02223100 -3.38755100 0.57921400

H 2.91924300 -3.25323600 -0.93382200

C 4.12062000 -2.95726700 0.83004900

H 4.94093300 -2.45249900 0.31845100

H 4.04490500 -2.56691800 1.84643100

H 4.37305000 -4.01828600 0.89434100

C 3.14053700 -0.47144100 -0.76101300

C 4.15049300 0.19091200 -0.06217800

C 2.94233400 -0.21982100 -2.12036500

C 4.95691100 1.11229600 -0.72747300

H 4.29861200 -0.00078600 0.99259100

C 3.74984100 0.70577200 -2.77714300

H 2.16398600 -0.74935300 -2.65722200

C 4.75804900 1.37177600 -2.08261800

H 5.73665200 1.63051300 -0.18226900

H 3.59160900 0.90141100 -3.83100600

H 5.38637300 2.09062400 -2.59498200

C -0.81647900 -0.59241600 1.93836400

H -1.15113500 -1.55139900 2.31751700

C 1.42678900 -1.04022000 2.91148400

H 1.08421300 -2.06786600 3.05115800

H 2.44877800 -1.06955600 2.52506500

H 1.47080700 -0.55726000 3.89386100

**int-17**

**G +ZPE =** **-1116.918547 a.u**

N -0.19856200 1.56276200 11.89307600

C 0.53645800 2.00548600 13.05638300

C -1.15146900 0.41551900 12.01242400

C 1.21366800 3.23166700 12.98129900

C 0.58818900 1.21579300 14.20628800

H -0.56840800 -0.46075200 12.29650300

H -1.52876800 0.23783700 11.00581900

C -2.29234600 0.64620600 12.98075000

C 1.93408500 3.65271900 14.09729400

C 1.31647800 1.65795800 15.30496500

H 0.07838500 0.26610400 14.25999100

C -2.72363700 -0.41660600 13.77968400

C -2.96726700 1.86765600 13.04613800

H 2.46509500 4.59650900 14.05198600

C 1.98495300 2.87871700 15.25383400

H 1.35895100 1.04460900 16.19611200

H -2.20679300 -1.36944900 13.73717100

C -3.81639800 -0.26187800 14.63031100

C -4.05239100 2.02509400 13.90530700

H -2.65296800 2.69996000 12.42829300

H 2.55166900 3.22452700 16.10988200

H -4.14167700 -1.09414400 15.24347300

C -4.48113000 0.96095200 14.69757400

H -4.56469000 2.97900000 13.95204800

H -5.32676000 1.08494100 15.36395800

C 1.02247500 3.15943200 10.47501300

C 1.13667900 4.04988700 11.72164500

H 0.26475600 4.71242000 11.75295600

H 2.01740800 4.68941700 11.63256000

C 0.68521000 3.99545900 9.20720800

H 0.61286500 3.30755200 8.35279200

H 1.56035700 4.62036400 9.02237300

N -0.46941600 4.88050800 9.33908300

C -0.31863400 6.13816200 8.56779600

H 0.69304500 6.50317100 8.75887400

H -0.39311100 5.94731400 7.48500600

C -1.31621600 7.22106400 8.96522600

H -2.34558100 6.93067500 8.74635100

H -1.24197400 7.44655000 10.03210900

H -1.10092800 8.13442900 8.40451700

C -1.75047800 4.24366100 9.14680200

C -2.75448600 4.44184200 10.10011400

C -2.03776400 3.46824100 8.01410600

C -4.01848400 3.87741300 9.92917500

H -2.53404600 5.04823800 10.97060800

C -3.29692600 2.89482100 7.85050700

H -1.28215400 3.31745000 7.25157900

C -4.29176400 3.09816900 8.80696100

H -4.78629900 4.04316100 10.67608900

H -3.50372200 2.29675900 6.97014400

H -5.27184700 2.65428000 8.67628800

C 0.00754400 2.09343700 10.72693000

H -0.54991800 1.66994500 9.89912000

C 2.35302900 2.40230500 10.18152200

H 2.25846300 1.76199200 9.30239700

H 3.13380300 3.14142400 9.98845600

H 2.66339100 1.78755100 11.02719500

**TS20**

**G +ZPE =** **-1116.892376 a.u**

N -0.81458000 -0.69271700 -0.85890400

C 0.42877100 -0.19082600 -1.18591200

C -2.02194500 -0.02188000 -1.37442700

C 1.62773700 -1.14851400 -1.22179200

H 0.38183000 0.49443600 -2.02320000

C -0.96025400 -1.96399900 -0.21994400

C -2.82699600 0.87585000 -0.43999100

H -1.71709200 0.56568500 -2.24286600

H -2.68109300 -0.80912600 -1.75227900

C 1.10562500 -2.58410600 -1.44194100

C 2.43433300 -1.13954500 0.12194400

C 0.31424600 2.40696600 -0.05306600

C 2.49212700 1.24769500 0.13837600

C 0.01853900 -2.93909300 -0.46983200

C -2.07220500 -2.28226300 0.56440000

C -3.85364400 1.63466700 -1.01718600

C -2.62125400 0.97088600 0.93765100

H 0.70482400 -2.65068000 -2.46064200

H 1.93543300 -3.29142800 -1.38337000

N 3.17915700 0.10116300 0.28246700

H 3.14626600 -1.96180700 0.11263500

H 1.76016600 -1.30469600 0.96656400

C 0.94958600 3.57682800 -0.34403600

H -0.76371500 2.38262600 0.02245200

C 3.12625700 2.50032200 -0.09005300

C -0.09590500 -4.19234300 0.12324800

C -2.18339400 -3.55102900 1.13256400

H -2.85327500 -1.55641900 0.73802000

C -4.65478800 2.46244400 -0.23696400

H -4.02558900 1.57719400 -2.08740200

C -3.42270900 1.80265400 1.72231700

H -1.83167500 0.40228400 1.41314800

C 4.65140100 0.05802700 0.37727600

C 2.36939900 3.61592300 -0.34412800

H 0.38621100 4.48180900 -0.53229500

H 4.20310600 2.57957400 -0.08076900

C -1.19085500 -4.50411300 0.92977000

H 0.66809500 -4.93787400 -0.06877600

H -3.04945100 -3.78371200 1.74077900

C -4.44232100 2.54907800 1.13955900

H -5.44298900 3.04220500 -0.70363300

H -3.24415600 1.86315900 2.78976000

C 5.16244900 0.39582300 1.77850100

H 5.08167700 0.72842700 -0.36951500

H 4.95774800 -0.95015500 0.10319500

H 2.87301400 4.55465300 -0.54519400

H -1.27151900 -5.48521600 1.38228000

H -5.06474300 3.19396900 1.74888300

H 6.25303600 0.33226600 1.79287500

H 4.87697500 1.40627300 2.07798500

H 4.76710200 -0.30661800 2.51522800

C 1.03828800 1.17738100 0.15514600

H 0.64139300 0.52807700 0.93002600

C 2.54243100 -0.75656900 -2.39567000

H 3.42750200 -1.39708600 -2.41716700

H 2.01167700 -0.88441800 -3.34155800

H 2.87468800 0.28118000 -2.33922600

**int-18**

**G +ZPE =** **-1116.901008 a.u**

N 2.03856600 4.77884100 11.60617400

C 2.48892500 3.89280100 12.69511900

C 0.59056700 5.00859200 11.56145400

C 4.01887400 3.74353900 12.75915700

H 2.15279600 4.30548000 13.65477600

C 2.87832600 5.76034300 11.05228900

C -0.18080900 4.26461300 10.47672800

H 0.16520100 4.74993200 12.53624600

H 0.41040500 6.08209500 11.45089500

C 4.66763900 5.13702100 12.70150300

C 4.47785000 2.92637200 11.54315100

C 0.87039000 2.10264700 13.63321500

C 2.70901800 1.34313400 12.08069300

C 4.19245000 5.94736400 11.52630100

C 2.43322400 6.56033200 9.98148300

C -1.57575700 4.18169600 10.57467200

C 0.45069800 3.68588500 9.37303800

H 4.42464900 5.65676000 13.63601500

H 5.75656100 5.03685300 12.68120500

N 3.86732500 1.58141900 11.50635600

H 5.55713900 2.77905400 11.58307700

H 4.24737200 3.44467700 10.60911800

C 0.52671400 0.82254000 13.85780600

H 0.39651000 2.91221800 14.17526200

C 2.18047100 0.01528000 12.22715400

C 5.01721100 6.89585300 10.92204100

C 3.26599800 7.51659500 9.40946200

H 1.43985100 6.42396900 9.57541800

C -2.32080800 3.53902200 9.59047800

H -2.08031800 4.62152300 11.42938900

C -0.29545700 3.03840900 8.38607000

H 1.52921900 3.74126200 9.28528500

C 4.64085900 0.53125800 10.79436100

C 1.15145300 -0.21905900 13.08738300

H -0.21636300 0.56236100 14.60024800

H 2.65173500 -0.81744300 11.72868900

C 4.56841700 7.69184900 9.87137800

H 6.02828200 7.01651000 11.29839900

H 2.89190400 8.11621200 8.58705400

C -1.68170100 2.96391800 8.49049800

H -3.39953200 3.48165900 9.68316500

H 0.21065200 2.59478400 7.53600700

C 4.14651300 0.31149700 9.36544600

H 4.60567100 -0.38772000 11.37782200

H 5.67707200 0.86366800 10.79243400

H 0.81534000 -1.24029900 13.22529600

H 5.22261900 8.42846300 9.42061900

H -2.26114200 2.46081400 7.72493200

H 4.76767200 -0.44891600 8.88779400

H 3.11069400 -0.03287600 9.34631800

H 4.21845700 1.22902900 8.77850000

C 1.82862500 2.47890700 12.54548300

H 1.16640700 2.55280700 11.65826600

C 4.43080000 3.06183600 14.07733600

H 5.51745700 2.95401600 14.11617300

H 4.12270800 3.67457400 14.92727600

H 3.99705600 2.06921400 14.21192400

**C1'**

**G +ZPE =** **-1116.510123 a.u**

N 2.05037300 4.56350500 11.73931900

C 2.65474700 3.82904400 12.88345600

C 0.58892800 4.61498300 11.69962400

C 4.18001500 3.66263200 12.69350800

C 2.06166400 2.44749500 13.05599900

H 2.48350800 4.39810600 13.80914700

C 2.74568400 5.62883100 11.15321600

C -0.06358600 4.06626900 10.43694300

H 0.21345900 4.03620200 12.54335700

H 0.24443300 5.64419400 11.86098500

C 4.81570700 5.04582400 12.49768800

C 4.42993400 2.80275900 11.44129400

C 1.11047700 2.18821200 14.03892700

C 2.55862300 1.38593400 12.25401600

C 4.10168200 5.88464200 11.46730600

C 2.11991200 6.46716400 10.20437100

C -1.34910900 4.49649700 10.08851500

C 0.56254900 3.10564800 9.63937000

H 4.81087800 5.56322700 13.46518500

H 5.86946600 4.93320800 12.22112400

N 3.53201300 1.64524500 11.30190800

H 5.46583700 2.44080500 11.48221100

H 4.34798900 3.42701600 10.54758000

C 0.57824200 0.91370000 14.23307800

H 0.77720600 3.01022600 14.66550800

C 2.02672000 0.09596700 12.47043000

C 4.77111300 6.93129500 10.83376800

C 2.80808700 7.51248700 9.59670900

H 1.09251500 6.29187500 9.91984100

C -1.99828500 3.97500900 8.97110300

H -1.84474500 5.24902600 10.69469400

C -0.08418400 2.58513100 8.51816700

H 1.55936100 2.77063400 9.90072100

C 4.01433500 0.58233100 10.41841400

C 1.04489600 -0.12489200 13.43228700

H -0.17092200 0.73776000 14.99553000

H 2.39461300 -0.75000200 11.90753900

C 4.14378700 7.75711500 9.90383300

H 5.81348700 7.10147300 11.08719300

H 2.29001600 8.13192900 8.87235200

C -1.36639100 3.01537700 8.18017800

H -2.99356100 4.32163200 8.71517000

H 0.41586600 1.84101000 7.90747600

C 4.52736800 1.09202300 9.06976900

H 3.18504800 -0.09628100 10.22224700

H 4.80322800 -0.00584300 10.91423800

H 0.66118400 -1.13080800 13.56646400

H 4.68626600 8.56627700 9.42918100

H -1.86708900 2.61109000 7.30756600

H 4.78444500 0.23506800 8.44230400

H 3.75989300 1.67381500 8.55278300

H 5.42203200 1.70967000 9.16501300

C 4.80329100 3.00840800 13.94027600

H 5.89382600 3.02545000 13.85756700

H 4.52620000 3.55665100 14.84551700

H 4.49173100 1.97082700 14.06624600

**TS21**

**G +ZPE =** **-1077.641935 a.u**

C -2.39935100 -1.36114600 8.46212100

C 0.34932600 -2.44805900 6.05490100

C -1.62735500 -0.78280500 9.48661000

C -3.74379300 -1.65187100 8.68366800

H -0.04498700 -3.46722100 6.00943500

H 1.41022400 -2.51701200 6.29896200

C 0.15433900 -1.76601200 4.71213200

C -2.23808600 -0.49843400 10.71773200

C -4.34324000 -1.35505000 9.90729900

H -4.33009700 -2.10904000 7.89319700

C -0.67537100 -2.33572300 3.74314900

C 0.80960700 -0.56406200 4.41948300

H -1.64437200 -0.07100500 11.51889700

C -3.58554600 -0.77517500 10.92475900

H -5.39183600 -1.57822000 10.06486600

H -1.18099500 -3.27233600 3.95367300

C -0.85500300 -1.71564700 2.50649300

C 0.63100000 0.05788200 3.18669400

H 1.47117400 -0.11503800 5.15259100

H -4.04184300 -0.54738600 11.88128400

H -1.50106700 -2.17051800 1.76438800

C -0.20389200 -0.51652400 2.22704500

H 1.14799600 0.98606900 2.97138700

H -0.34090200 -0.03328900 1.26647900

C 0.38168400 -1.19412100 8.16515100

C -0.20238900 -0.55705600 9.24732900

C -0.09881300 1.76569300 8.46030400

H -1.15040000 1.70593600 8.69093300

H 0.23161000 1.52084000 7.46387100

N 0.65789900 2.52220500 9.22613200

C 0.06276200 3.05758400 10.48461400

H -0.58591500 2.27638600 10.87962600

H 0.87123700 3.19581000 11.19923200

C -0.72697700 4.34631300 10.26557000

H -0.10071700 5.14943100 9.87432500

H -1.55463000 4.18586500 9.57164700

H -1.14367400 4.67216000 11.22099100

C 2.03445300 2.79060800 8.92012500

C 2.75776100 1.92315800 8.09459300

C 2.66017300 3.92634600 9.44628000

C 4.08696000 2.19909100 7.79016700

H 2.30399400 1.02336300 7.70540100

C 3.99036600 4.19130700 9.13501500

H 2.12225800 4.61546700 10.08144700

C 4.70963800 3.33351600 8.30593900

H 4.63667300 1.51453900 7.15553900

H 4.46067800 5.07772700 9.54314500

H 5.74533900 3.54385000 8.06864800

H 1.45971100 -1.28034600 8.09092800

N -0.31120300 -1.75682600 7.17240400

C -1.77742300 -1.62979700 7.10805900

H -2.02770600 -0.82635400 6.40255700

H -2.17752300 -2.55459600 6.68504900

H 0.44011100 -0.29882800 10.07839800

**int-19**

**G +ZPE =** **-1077.655926 a.u**

C -2.36345200 -1.18922500 8.29983900

C 0.98816300 -1.97378200 6.61234600

C -1.94819600 -0.38777300 9.36232800

C -3.66247600 -1.70576700 8.27956100

H 0.88425300 -3.03462900 6.84560700

H 1.97346700 -1.64648100 6.94066100

C 0.78670300 -1.72808700 5.13499600

C -2.83778100 -0.12108900 10.40923600

C -4.54708000 -1.42000600 9.31270500

H -3.97774000 -2.33452600 7.45405200

C 0.20375700 -2.70970900 4.32811000

C 1.20941900 -0.52724800 4.55396200

H -2.51281100 0.48077900 11.25094900

C -4.13161200 -0.62823300 10.38410500

H -5.55288100 -1.82198400 9.28879600

H -0.10967000 -3.65234600 4.76379400

C 0.03181700 -2.48931300 2.96254400

C 1.03539200 -0.30625000 3.19062200

H 1.68540100 0.23074500 5.16526000

H -4.81163500 -0.41352600 11.19977400

H -0.41871600 -3.25810600 2.34589200

C 0.44360000 -1.28618600 2.39323700

H 1.36876400 0.62585400 2.74956300

H 0.31180700 -1.11472600 1.33121900

C 0.36687100 -0.50038100 8.44041000

C -0.54356700 0.16766900 9.39811200

C -0.52443100 1.74763600 9.22057400

H -1.29031400 2.11948000 9.90286300

H -0.85863600 2.00187100 8.21703200

N 0.73470100 2.36848300 9.54273500

C 0.95716700 2.65509100 10.96487700

H 0.38821800 1.91982500 11.53878000

H 2.00488700 2.47441500 11.21248000

C 0.53459500 4.06602600 11.38687900

H 1.10162900 4.82989500 10.85097200

H -0.52786000 4.22974000 11.18911300

H 0.70497600 4.20342300 12.45805100

C 1.64255200 2.77869600 8.56792900

C 1.41867700 2.54994800 7.19196000

C 2.83961200 3.44366800 8.92052000

C 2.34075400 2.96456100 6.23388300

H 0.51696000 2.06240500 6.84895700

C 3.75239700 3.84361200 7.95142500

H 3.06214400 3.66119800 9.95496200

C 3.51867000 3.61165400 6.59677700

H 2.12325400 2.77986100 5.18745200

H 4.65740800 4.35116500 8.26731500

H 4.23101000 3.93181100 5.84633300

H 1.43565000 -0.35865800 8.56006200

N -0.00880800 -1.26460500 7.47580300

C -1.43276300 -1.51683800 7.16225600

H -1.66481000 -0.92876000 6.26965800

H -1.51676200 -2.56866900 6.88604700

H -0.10438100 -0.00956000 10.38676700

**TS22**

**G +ZPE =** **-1077.626713 a.u**

C 1.78120000 5.32754100 11.71446100

C -0.47601900 3.95099300 14.03999700

C 2.01168200 4.19906500 10.92584300

C 2.82515000 6.21115800 11.99184500

H 0.47527000 3.83284500 14.57397700

H -0.97744500 2.98019000 14.08410900

C -1.31852800 4.98322700 14.76950200

C 3.29474000 3.95462400 10.42882700

C 4.09872000 5.97256600 11.48082400

H 2.64265400 7.08209600 12.61232600

C -1.12658500 5.14718300 16.14594400

C -2.30769100 5.74245300 14.13675100

H 3.48105800 3.06975200 9.82918200

C 4.33448000 4.84000300 10.70158200

H 4.90710300 6.66038700 11.70011200

H -0.35312900 4.57658100 16.64973100

C -1.91497100 6.03313100 16.87653600

C -3.09257100 6.63629700 14.86452600

H -2.46217600 5.65422800 13.06816200

H 5.32680400 4.64287900 10.31298600

H -1.75174300 6.14473700 17.94243000

C -2.90241200 6.78159300 16.23714400

H -3.85126000 7.21990600 14.35560400

H -3.51242500 7.47686600 16.80219500

C -0.19738800 3.21794900 11.71023200

C 0.86183600 3.26512900 10.59445600

C 0.28538500 3.61180800 9.18520600

H 1.09907500 3.64797000 8.46567800

H -0.18284300 4.59981700 9.19428300

N -0.65599600 2.58278900 8.76546600

C -0.32853700 1.76885200 7.57989300

H 0.75308000 1.81472700 7.45087200

H -0.57103400 0.72627400 7.78461100

C -1.03730900 2.25946800 6.31720900

H -2.12260500 2.20449000 6.42655600

H -0.76501900 3.29302400 6.09244000

H -0.74646500 1.63607200 5.46846800

C -1.67983500 2.30744200 9.59226700

C -1.87391100 3.19047900 10.73137900

C -2.52152800 1.17043900 9.44652900

C -2.94566000 2.87971600 11.64632200

H -1.77460200 4.24652700 10.49265000

C -3.48382500 0.90634800 10.38843700

H -2.41535200 0.51127800 8.59765800

C -3.69876000 1.75318100 11.51025200

H -3.13267600 3.56465800 12.46398700

H -4.10293600 0.02465900 10.26804500

H -4.47654200 1.51337000 12.22385800

H -0.28020900 2.24142100 12.17178300

N -0.20698300 4.23395100 12.62629000

C 0.38733200 5.52473000 12.26155500

H -0.24979900 6.03194500 11.52609400

H 0.40206400 6.15969200 13.14523600

H 1.25483400 2.25089700 10.50164200

**int-20**

**G +ZPE =** **-1077.627937 a.u**

C 2.05805800 4.74601600 12.28392000

C -1.38863100 4.07866900 13.64112800

C 2.05844100 4.03323900 11.08540600

C 3.15419900 5.55410900 12.60715100

H -1.08373600 3.45484500 14.49775400

H -2.28151600 3.61890000 13.21758700

C -1.78537800 5.45478000 14.14468600

C 3.15967800 4.13124300 10.22466600

C 4.24252200 5.65130000 11.74798300

H 3.14959000 6.10954300 13.53947300

C -1.78653600 5.73928400 15.51229100

C -2.20036000 6.44791900 13.24934000

H 3.16731100 3.56684300 9.29752600

C 4.24666100 4.93399900 10.54989800

H 5.08413100 6.28286400 12.00841300

H -1.46357000 4.97978200 16.21689200

C -2.19558400 6.98863200 15.98081500

C -2.60541700 7.69646000 13.71349900

H -2.20057500 6.23927800 12.18546100

H 5.09333700 4.99924900 9.87640300

H -2.18922500 7.19307500 17.04560200

C -2.60520800 7.97082600 15.08230400

H -2.92473700 8.45584400 13.00832200

H -2.92118500 8.94304500 15.44323900

C -0.07986700 2.87317200 11.88266300

C 0.88569900 3.14993700 10.71686800

C 0.08504300 3.74033200 9.54626600

H 0.73576200 4.07643800 8.74362800

H -0.50969900 4.59227400 9.88923300

N -0.79544800 2.69431000 8.99964300

C -0.89655300 2.59100900 7.52444700

H 0.06594000 2.91289100 7.12892600

H -1.01548300 1.54536100 7.24940700

C -2.02835100 3.45036400 6.96251900

H -2.99923100 3.12680200 7.34315200

H -1.88819000 4.50319600 7.21474600

H -2.03832400 3.35869500 5.87454400

C -1.43819300 1.91003900 9.83869100

C -1.41218700 2.25406100 11.31512300

C -2.23985200 0.80613400 9.40176700

C -1.97510700 1.18705200 12.20236400

H -2.14437600 3.08210200 11.33910800

C -2.80064800 -0.04042100 10.30628200

H -2.37235000 0.61674400 8.34794400

C -2.64023200 0.12212000 11.72669000

H -1.84786000 1.32306700 13.26869900

H -3.37618700 -0.88330000 9.94151900

H -3.05878700 -0.61878600 12.39528000

H 0.37570500 2.12009900 12.54382800

N -0.33137400 4.13140000 12.61391900

C 0.90780800 4.60849100 13.24437800

H 0.70036400 5.57595700 13.70377700

H 1.20529700 3.92993500 14.06677600

H 1.27968000 2.18593100 10.37745900

**D1'**

**G +ZPE =** **-1077.240823 a.u**

C 2.21594500 4.66784200 12.32363000

C -1.31919900 3.90791500 13.40918700

C 2.33585500 3.89575600 11.16322000

C 3.27033400 5.50545500 12.70569100

H -1.07721500 3.38199000 14.35010700

H -2.09974600 3.32740700 12.91634500

C -1.87477800 5.28054600 13.74209200

C 3.51246200 3.97306900 10.40712000

C 4.43411500 5.57955300 11.94758400

H 3.17458200 6.10405100 13.60647300

C -2.07172800 5.67126700 15.06912200

C -2.24022700 6.16821900 12.72197900

H 3.60829900 3.36636200 9.51182500

C 4.55750000 4.80660300 10.79156500

H 5.24112100 6.23512400 12.25509500

H -1.78874300 4.99662700 15.87090500

C -2.62433600 6.91599700 15.37560600

C -2.78890600 7.41186200 13.02339400

H -2.08701600 5.87808900 11.68871100

H 5.46282500 4.85300100 10.19681000

H -2.76814800 7.20146100 16.41191300

C -2.98421000 7.79058100 14.35311100

H -3.06762900 8.08672700 12.22134100

H -3.41146200 8.75914700 14.58750200

C 0.24011900 2.67327200 11.89196400

C 1.19680600 2.99912600 10.73145100

H 1.60910400 2.05555900 10.35715800

C 0.39243300 3.65116200 9.59778100

H 1.05289000 3.85219600 8.75099000

H 0.00533900 4.61384600 9.95513300

N -0.68100700 2.78019500 9.12893600

C -1.21477400 3.06784900 7.79960100

H -0.38000700 3.43054900 7.19506800

H -1.54213900 2.13640300 7.33114900

C -2.34936900 4.10051800 7.77741600

H -3.20945900 3.75864000 8.35793500

H -2.01671500 5.05573100 8.19154500

H -2.68109700 4.27435300 6.74985800

C -1.34341500 1.95400400 10.01874300

C -0.90678200 1.83391800 11.36721200

C -2.44087100 1.15807700 9.61072100

C -1.50454000 0.88451000 12.19805300

C -3.03343500 0.24655100 10.47482100

H -2.82935500 1.24359500 8.60572700

C -2.56460300 0.08629500 11.77784100

H -1.12704100 0.78164200 13.21090400

H -3.86829500 -0.34753300 10.11812900

H -3.01478200 -0.63483800 12.44930500

H 0.78055600 2.06640000 12.63911100

N -0.16503700 3.96559600 12.50707100

C 0.98182900 4.56836700 13.19008800

H 0.69737400 5.56664300 13.53065400

H 1.23630700 3.99059800 14.10194000

**TS1**

**G +ZPE =** **-544.903059 a.u**

C -1.95110600 0.25090600 -1.42135500

O -1.04353000 -0.02285800 -0.64485200

H -2.08039800 1.28149900 -1.78199600

H -2.62165600 -0.51112700 -1.82858400

C -4.76961000 -0.87194400 0.67095800

H -5.18321500 -1.38395100 -0.21628500

H -5.42343600 -0.00450800 0.86372800

H -4.91058900 -1.56226500 1.52095000

O -3.44007800 -0.48844800 0.48834500

C 0.13573700 -3.55410100 1.68444400

H -0.25541400 -4.33959300 1.01134300

H 0.40379600 -4.06592100 2.62577400

H 1.08984100 -3.21450500 1.24025000

O -0.76635300 -2.51840100 1.90383500

Mg -1.76178100 -1.30074400 0.90428400

**int-21**

**G +ZPE =** **-544.916387 a.u**

C -2.50116000 0.46030800 -0.67916000

O -1.16451700 0.35024700 -0.59105400

H -2.91477900 1.42076400 -0.32359000

H -2.92711500 0.22304700 -1.67205000

C -4.41668900 -0.92610600 0.12494300

H -4.63412500 -1.30713800 -0.87865900

H -5.04661300 -0.05353400 0.32438600

H -4.63460800 -1.69918000 0.86079200

O -3.03875500 -0.58567100 0.25104800

C -0.04731300 -3.81503600 1.80717800

H 0.44127300 -4.05006600 2.76966700

H 0.52881600 -4.35552100 1.03336200

H -1.04162800 -4.29729700 1.84446000

O -0.10349500 -2.44438200 1.58147600

Mg -1.07708500 -1.22639300 0.56804200

**int-22**

**G +ZPE =** **-1948.584984 a.u**

C -1.23486600 0.30672000 0.31426400

C -0.11309100 0.46146400 -0.53398700

C 0.17241300 1.77246300 -1.03997900

C -0.67107300 2.87359600 -0.77030100

C -1.76970400 2.73607400 0.11019200

C -2.00918000 1.43931900 0.67384100

H -1.38454800 -0.63495400 0.83913400

H 1.07215300 1.92675700 -1.62213000

H -0.38867000 3.84926000 -1.13824000

H -2.78903600 1.32983900 1.41723600

C -2.68512200 3.88406900 0.48635100

H -2.96359100 3.73055200 1.53432600

C -2.05044900 5.27323800 0.35984300

H -2.74231900 6.02355100 0.74885400

H -1.11900700 5.34030000 0.92496300

H -1.84501300 5.53119900 -0.68303800

C -3.97155500 3.77944200 -0.36232000

H -4.46487800 2.81312200 -0.23483100

H -4.67341100 4.56103100 -0.06240600

H -3.74728800 3.91202500 -1.42440600

C 0.78046700 -0.69296200 -0.87348200

H 0.68471200 -1.49886500 -0.14687100

H 0.49420900 -1.08397300 -1.85569700

H 1.82524900 -0.38404800 -0.93057500

Ru 0.05123300 1.93260700 1.14409400

O 0.69355900 0.81233400 2.73165800

C 1.21922800 1.23829800 3.94457800

H 0.64438800 2.05181300 4.39727600

H 2.28027100 1.50857500 3.87729800

O 1.08987300 0.04833700 4.75895000

C 1.85719400 0.03084200 5.96903100

H 1.54679400 0.84903600 6.62375500

H 1.65501900 -0.92091000 6.45577900

H 2.92506400 0.11526700 5.74876300

C -2.29914300 -2.07495000 3.15100000

H -3.06705000 -1.57561700 2.53162400

H -2.64330300 -3.11587800 3.28177000

H -2.35493500 -1.60334000 4.14851800

O -1.03297600 -2.00601500 2.56849300

Mg 0.60176500 -1.22016300 3.11570100

Cl 2.65247600 -2.25112600 2.53417700

Cl 1.15059200 3.88740000 2.07883100

**int-23**

**G +ZPE =** **-1172.969884 a.u**

C -1.25148300 1.18104500 0.07881700

C -0.06520700 1.36335400 -0.67997100

C 0.23067300 2.68112600 -1.15868800

C -0.62776600 3.76925800 -0.89368300

C -1.75917900 3.61392800 -0.06038900

C -2.04599100 2.29566800 0.43089600

H -1.47112800 0.21126600 0.50586800

H 1.15264000 2.85117700 -1.69931700

H -0.32702900 4.75587600 -1.21551300

H -2.87818000 2.15815200 1.11054700

C -2.68183000 4.75781800 0.31436300

H -3.04061100 4.54787800 1.32765500

C -2.00746000 6.13441000 0.32814700

H -2.70469400 6.87727000 0.72232300

H -1.11387900 6.13465400 0.95577000

H -1.72412900 6.45704400 -0.67784000

C -3.90440100 4.74364200 -0.62796900

H -4.42489400 3.78337300 -0.60057100

H -4.61156400 5.52116600 -0.32894000

H -3.60085200 4.93806500 -1.66059300

C 0.85216900 0.21535900 -0.98238900

H 0.77686200 -0.56426800 -0.22415100

H 0.57552000 -0.22115800 -1.94791900

H 1.88931700 0.54643800 -1.04959400

Ru 0.00180800 2.74495200 1.04577900

O 0.38430500 1.67714900 2.65779100

C 1.18798300 2.00153000 3.73438200

H 0.81271800 2.88533400 4.27800300

H 2.22921500 2.19977900 3.42844000

O 1.16659000 0.87509800 4.60679200

C 1.97627100 1.07858100 5.75240000

H 1.63511200 1.93936400 6.34475800

H 1.90368200 0.17941300 6.36449900

H 3.02960900 1.24018200 5.48278800

Cl 1.37212100 4.59746400 1.87113400

**TS2**

**G +ZPE =** **-1172.96371 a.u**

C -1.92691400 0.18264000 -0.11702700

C -0.69010300 -0.00368100 -0.75675100

C 0.17771700 1.13461400 -0.88862500

C -0.20508300 2.40616100 -0.43185100

C -1.45577500 2.59589900 0.23952900

C -2.28700600 1.45926600 0.40760000

H -2.57827100 -0.66534300 0.05107500

H 1.16043100 1.00018000 -1.32044600

H 0.48771400 3.22973600 -0.53434900

H -3.21459600 1.56061400 0.95706700

C -1.93157300 3.95575400 0.71796300

H -2.59284500 3.77369400 1.57144400

C -0.81119000 4.89690600 1.17844600

H -1.24889100 5.80208900 1.60524300

H -0.18105200 4.43530900 1.94157800

H -0.17187500 5.20655800 0.34725600

C -2.77408300 4.60627600 -0.39964300

H -3.61155600 3.96888500 -0.69231000

H -3.17667700 5.56162500 -0.05430300

H -2.16330400 4.79610400 -1.28706700

C -0.25936100 -1.34378600 -1.27514400

H -0.33252300 -1.35357800 -2.36738200

H 0.77742800 -1.54906800 -1.00405100

H -0.88915700 -2.14223800 -0.88224000

Ru -0.31419300 0.96331500 1.29273000

O -0.99763400 0.41836200 3.21792000

C -0.34876300 1.47259500 3.61853500

H -0.92873700 2.38316600 3.84052800

H 0.34170300 1.95791700 2.55628200

O 0.63248300 1.24638200 4.55244400

C 1.27588800 2.42787300 5.04282400

H 0.54262300 3.15646500 5.40301900

H 1.91109700 2.11347100 5.86787600

H 1.89384600 2.88455200 4.26258000

Cl 1.70248200 -0.45368000 1.73493500

**int-24**

**G +ZPE =** **-1172.990867 a.u**

C -1.74648600 0.83942900 0.68625400

C -0.62536200 0.53890300 -0.17498300

C 0.02652100 1.61123200 -0.76163800

C -0.41702800 2.95740300 -0.50290800

C -1.64661700 3.24208300 0.14332600

C -2.31392400 2.13114600 0.75440200

H -2.22577200 0.02947700 1.22308200

H 0.92205300 1.45349800 -1.34959600

H 0.17086500 3.77279700 -0.90181500

H -3.22213000 2.28922200 1.32159200

C -2.27624400 4.62358300 0.17944100

H -2.87129000 4.67281000 1.09726800

C -1.27016200 5.78015100 0.21242200

H -1.80409300 6.72671200 0.32732500

H -0.57241700 5.67891200 1.04605200

H -0.69264100 5.84412500 -0.71415900

C -3.24291400 4.76599600 -1.01415400

H -3.99306600 3.97115700 -1.01970700

H -3.76564200 5.72473700 -0.96358500

H -2.69819600 4.72561800 -1.96219400

C -0.17781500 -0.88364500 -0.35146700

H -0.09924500 -1.39133900 0.61309800

H -0.90962400 -1.43610300 -0.94982300

H 0.78799000 -0.93857300 -0.85461900

Ru -0.28404900 2.24122800 1.58060600

O 0.25886400 0.82420000 3.17427400

C 0.72566400 1.11017600 4.26653600

H -0.81201500 3.16829700 2.75164100

H 0.87930000 2.14148700 4.59756600

O 1.07268400 0.15972200 5.10267300

C 1.60434700 0.53705500 6.39899800

H 0.90503000 0.18955700 7.15671300

H 2.56411000 0.03767600 6.50919000

H 1.73069600 1.61783200 6.46510000

Cl 1.92378700 3.33850900 2.05254200

**int-25**

**G +ZPE =** **-947.431605 a.u**

C -2.56762600 0.62033500 -0.72586800

O -1.25572900 0.62754100 -0.72354200

H -3.05304200 1.53182400 -0.30236000

H -3.05016800 0.41613600 -1.71172200

C -4.44124900 -0.93692600 0.09611200

O -3.07535400 -0.51024800 0.18625200

C -4.65438000 -1.85319000 1.30834000

H -5.67115600 -2.25639800 1.32497300

H -3.95264400 -2.69150900 1.27757500

H -4.48590200 -1.29898200 2.23556900

C -5.41294600 0.25427500 0.17626500

H -5.32360700 0.90623900 -0.69544200

H -6.44697200 -0.09955500 0.22517400

H -5.21099600 0.84913100 1.07113200

C -4.67832400 -1.73676000 -1.19942400

H -3.98160600 -2.57802500 -1.25206900

H -5.69787900 -2.13280300 -1.23275900

H -4.53109500 -1.11465100 -2.08484500

K -0.59241300 -1.27580700 0.78085600

**int-26**

**G +ZPE =** **-2351.115885 a.u**

C -0.71921700 0.17210700 -0.11710500

C 0.34887700 0.71801800 -0.89814500

C 0.31628100 2.10699500 -1.21030700

C -0.68499600 2.94430200 -0.68582400

C -1.69741600 2.42527900 0.17172700

C -1.71845100 1.01204500 0.40514500

H -0.70808400 -0.87799600 0.15813600

H 1.13777500 2.54347300 -1.76281800

H -0.61302800 4.01032900 -0.84846200

H -2.46677600 0.59813000 1.06959500

C -2.77292400 3.29960600 0.78622200

H -3.11636000 2.78282700 1.68796800

C -2.28959700 4.69573100 1.19880000

H -3.09069300 5.21585900 1.72880000

H -1.42340900 4.63706600 1.86156800

H -2.02054900 5.30808900 0.33402300

C -3.96480700 3.38093900 -0.19117100

H -4.34255100 2.38826300 -0.44742900

H -4.77965500 3.94699700 0.26651100

H -3.67712300 3.88671100 -1.11717400

C 1.45478300 -0.16050000 -1.40484200

H 1.64270900 -0.99267400 -0.72591500

H 1.16435900 -0.57762100 -2.37516200

H 2.37778900 0.40323300 -1.54317000

Ru 0.25562000 1.81636200 1.02072100

O 0.41635400 0.91748100 2.79666300

C 1.25239800 1.29835300 3.84118800

H 1.00187000 2.30300900 4.20424300

H 2.30693800 1.27984300 3.54146100

O 1.01934200 0.33633900 4.87782300

C 1.86643200 0.37805400 6.05992300

Cl -1.13699800 -3.29377000 1.37650100

Cl 1.96622000 3.46748400 1.60960200

K -0.80437300 -1.31453600 3.73665700

C 1.26671300 -0.69078300 6.97649900

H 1.29576600 -1.67033300 6.49244600

H 1.82952400 -0.75360100 7.91057000

H 0.22754400 -0.45018900 7.21421800

C 1.79360500 1.75519100 6.73452500

H 2.31371600 1.72692200 7.69524800

H 2.26201800 2.53350300 6.12816800

H 0.75274300 2.03529400 6.91603000

C 3.31388500 0.01301400 5.69893200

H 3.91169000 -0.08719100 6.60843000

H 3.34126300 -0.93901900 5.16292100

H 3.78693200 0.77549500 5.07669000

**int-27**

**G +ZPE =** **-1290.79235 a.u**

C -0.37297500 1.18696600 0.11975400

C 0.63313100 1.75655100 -0.72723400

C 0.41955700 3.06931700 -1.23211900

C -0.69064900 3.83092700 -0.82441400

C -1.64268900 3.30470500 0.09702700

C -1.49033600 1.94312400 0.51607900

H -0.22396400 0.19636000 0.53027800

H 1.18582600 3.53180600 -1.84005300

H -0.75594900 4.86489700 -1.13230400

H -2.19053400 1.52639700 1.22891800

C -2.83706000 4.10557000 0.57906500

H -3.14401700 3.66419500 1.53248000

C -2.54017300 5.59078700 0.82236000

H -3.41499400 6.06869300 1.26916100

H -1.69547800 5.72086900 1.50238400

H -2.31886000 6.12146900 -0.10753900

C -3.99734200 3.92001800 -0.42126200

H -4.24319400 2.86443200 -0.55968900

H -4.88990500 4.43127100 -0.05256300

H -3.74227000 4.34216400 -1.39745000

C 1.85098400 0.96694200 -1.11000700

H 2.13648500 0.27044400 -0.32085500

H 1.63359100 0.38346100 -2.01114900

H 2.69550900 1.62132200 -1.32764900

Ru 0.34503100 3.06725000 1.03332200

O 0.51086700 2.46348400 2.90037400

C 1.24340300 3.05180300 3.93945800

H 1.02836300 4.12193700 4.01650600

H 2.32056600 2.92385800 3.77239200

O 0.85395800 2.49750500 5.17977200

C 1.58327000 1.35241500 5.70155700

Cl 1.90644900 4.92432400 1.40137600

C 0.73479100 0.89870800 6.89169600

H 1.20453700 0.05475700 7.40284900

H 0.61852200 1.71687300 7.60672300

H -0.25843400 0.59272800 6.55420300

C 1.70037500 0.22295000 4.66983800

H 0.71218800 -0.08706300 4.32529200

H 2.28349800 0.53120700 3.80004300

H 2.19889400 -0.63894700 5.12243200

C 2.97148600 1.80202400 6.18182700

H 2.87441700 2.61828100 6.90201600

H 3.49558800 0.97352800 6.66593400

H 3.59339100 2.14647400 5.35199400

**TS3**

**G +ZPE =** **-1290.781851 a.u**

C -2.04462100 0.21624100 -0.11429300

C -0.85637000 -0.06242800 -0.81058100

C 0.06626800 1.01853800 -1.02463100

C -0.21773900 2.32382900 -0.59260500

C -1.41660500 2.60634300 0.13720900

C -2.30279300 1.52670700 0.38585600

H -2.73323800 -0.58671200 0.11551500

H 1.01574500 0.81365800 -1.50090900

H 0.51405300 3.10154500 -0.75965700

H -3.19358700 1.69931100 0.97681200

C -1.78902900 4.00571900 0.59356900

H -2.36301100 3.89208300 1.51915900

C -0.59160200 4.91858700 0.88416100

H -0.94402200 5.85474900 1.32272800

H 0.10809200 4.45968000 1.58545700

H -0.04418700 5.17274600 -0.02766900

C -2.71950700 4.64035600 -0.46181500

H -3.61071500 4.03123100 -0.62890600

H -3.04047300 5.63027100 -0.12836700

H -2.20088600 4.75586400 -1.41800000

C -0.53220600 -1.44050400 -1.30741200

H -1.17992600 -2.18930100 -0.85087200

H -0.67241200 -1.48062200 -2.39242300

H 0.50637400 -1.69619200 -1.09155200

Ru -0.31961300 0.93833800 1.18486700

O -0.92967200 0.44032400 3.13749700

C -0.22122300 1.47019300 3.52184300

H -0.76376300 2.39803800 3.74482300

H 0.42884700 1.90905400 2.42115800

O 0.77285200 1.18554000 4.41821000

C 1.34261500 2.25796400 5.25270800

C 0.27610300 2.78140500 6.22089800

H 0.72867300 3.48809300 6.92067500

H -0.53194500 3.30376100 5.70391700

H -0.15325100 1.95660300 6.79409400

C 1.91857700 3.37489000 4.37728900

H 2.45490700 4.09133900 5.00400400

H 2.62071300 2.96755100 3.64635100

H 1.13861200 3.92565000 3.84674800

C 2.45657100 1.54252500 6.01566500

H 3.20016500 1.14500700 5.32179900

H 2.95208000 2.23589200 6.69881900

H 2.04695800 0.71408300 6.59765600

Cl 1.66097200 -0.55274800 1.55095200

**int-28**

**G +ZPE =** **-1290.813539 a.u**

C -1.71762700 0.87879200 0.54969100

C -0.53874200 0.64376500 -0.25287500

C 0.12490500 1.75750600 -0.74045300

C -0.36236100 3.08026300 -0.44211100

C -1.63579100 3.30777400 0.13767600

C -2.31638900 2.15451100 0.64725600

H -2.21190200 0.03327300 1.01313000

H 1.05907500 1.64743800 -1.27702900

H 0.23136400 3.92597400 -0.76139700

H -3.26228600 2.26599200 1.16141400

C -2.29687300 4.67333300 0.20346100

H -2.95468900 4.66101900 1.07873300

C -1.32163800 5.84473900 0.36837900

H -1.88296400 6.77372200 0.49570100

H -0.68136300 5.71046600 1.24248400

H -0.68293200 5.96953000 -0.51060900

C -3.18205100 4.86272300 -1.04559000

H -3.91175900 4.05529400 -1.14614000

H -3.72869200 5.80718400 -0.98088600

H -2.57232000 4.88457700 -1.95384300

C -0.05150200 -0.75924100 -0.47531800

H -0.03376600 -1.32052600 0.46217800

H -0.72603100 -1.28785300 -1.15683300

H 0.94961600 -0.76996300 -0.90743200

Ru -0.34602200 2.25642300 1.60757200

O 0.09184000 0.77105800 3.16528000

C 0.47516500 1.01383500 4.30475600

H -0.96050300 3.12045400 2.78456900

H 0.61719000 2.03630300 4.65871800

O 0.72863600 0.03169400 5.12999900

C 1.18103000 0.31305200 6.53919800

C 1.33842800 -1.08802600 7.11807300

H 2.07935100 -1.65633900 6.55261000

H 1.66995500 -1.02082300 8.15613300

H 0.38805000 -1.62445200 7.09066600

C 2.51552300 1.05332200 6.49135200

H 2.41595600 2.05797900 6.07573600

H 2.90555800 1.15251600 7.50664100

H 3.24289800 0.49627500 5.89735900

C 0.08868000 1.09855000 7.26139500

H -0.03497700 2.10419200 6.85447900

H -0.86659600 0.57298000 7.20159700

H 0.35867500 1.20030100 8.31466800

Cl 1.81503800 3.34465600 2.27325200

**int-29**

**G +ZPE =** **-829.614872 a.u**

C -2.54027100 0.38039900 -0.78292200

O -1.24473600 0.52684600 -0.68693900

H -3.16403500 1.27247700 -0.50407500

H -2.92764300 0.01509600 -1.77241700

C -4.42674200 -0.88431800 0.12063000

H -4.75166500 -1.20384000 -0.88259500

H -4.98320000 0.03251800 0.37343000

H -4.70738300 -1.66254200 0.83487400

O -3.03464900 -0.69024000 0.18591400

K -0.57512200 -1.13005200 1.09879600

**int-30**

**G +ZPE =** **-2233.298213 a.u**

C -0.83207500 0.15951600 0.04143000

C 0.23484900 0.60218400 -0.80248200

C 0.24827300 1.96540000 -1.21767500

C -0.71050100 2.87823300 -0.74148900

C -1.71743400 2.46654000 0.17733600

C -1.78189500 1.07728200 0.52360800

H -0.85178000 -0.86618900 0.39693800

H 1.07129800 2.32579100 -1.82060600

H -0.60319900 3.92496300 -0.98792100

H -2.52410500 0.74710400 1.23980500

C -2.74286800 3.42589400 0.74882300

H -3.07392700 2.99694600 1.69999400

C -2.20055400 4.83303600 1.02919900

H -2.96447000 5.42142100 1.54245700

H -1.31191300 4.79836700 1.66326300

H -1.94585200 5.36365700 0.10790200

C -3.96220200 3.47060100 -0.19653900

H -4.38186500 2.47505400 -0.35924400

H -4.74192800 4.10148300 0.23685600

H -3.68699900 3.88911400 -1.16877900

C 1.29328000 -0.35473400 -1.26620800

H 1.45871400 -1.14778800 -0.53661400

H 0.96689700 -0.82163600 -2.20183300

H 2.23631400 0.15820400 -1.45698500

Ru 0.23362100 1.84923300 1.02478700

O 0.44572600 1.04985700 2.84276200

C 1.33536400 1.44729300 3.82526000

H 1.14410600 2.47533700 4.17035400

H 2.38309700 1.37542800 3.49498000

O 1.13589300 0.54772400 4.92241800

C 2.00632500 0.81657800 6.01338100

H 1.84927900 1.82766900 6.41006400

H 1.78150600 0.08964300 6.79325100

H 3.05856000 0.71310100 5.71954300

Cl -1.22663000 -3.19280300 1.76061900

Cl 1.94847700 3.53138800 1.49464600

K -0.79752600 -1.08936000 3.98733300

**[RuCl2]**

**G +ZPE =** **-1403.658702 a.u**

C -1.99058200 0.68511500 -0.66000900

C -0.65853400 0.55003000 -1.15049400

C 0.13195000 1.71898400 -1.18439300

C -0.40336200 2.98248300 -0.79753800

C -1.76949500 3.14048000 -0.43094600

C -2.54334600 1.95863700 -0.34194100

H -2.58956900 -0.20234900 -0.50026700

H 1.18533400 1.64683500 -1.42198600

H 0.26531900 3.83122800 -0.75474400

H -3.54767200 2.00668400 0.05914100

C -2.38856100 4.48209800 -0.09606500

H -3.16203100 4.28956300 0.65357900

C -1.40745300 5.50462300 0.48935200

H -1.95801000 6.39560800 0.79919400

H -0.89071000 5.10505200 1.36382600

H -0.66254700 5.82279700 -0.24532600

C -3.07984700 5.03084000 -1.36222700

H -3.82115700 4.32985000 -1.75289400

H -3.58872600 5.96870200 -1.12736900

H -2.34835900 5.22889300 -2.15083700

C -0.10221800 -0.78853300 -1.52899900

H -0.56330800 -1.58801300 -0.94847800

H -0.31169900 -0.97465400 -2.58730500

H 0.97741100 -0.82489300 -1.38479900

Ru -0.72827500 1.59265700 0.86013900

Cl -1.37712200 2.52268700 2.99688200

Cl 0.73017300 0.02636600 1.98201700

**[RuHCl]**

**G +ZPE =** **-943.956897 a.u**

C -2.03791200 0.66582800 -0.46992000

C -0.75510800 0.52471600 -1.06399900

C 0.02680300 1.70927400 -1.13626400

C -0.50654200 2.94457400 -0.65957200

C -1.92070700 3.11111700 -0.39067800

C -2.66389400 1.94950300 -0.28191900

H -2.61980100 -0.22771900 -0.27698900

H 1.05421900 1.66503000 -1.47261600

H 0.14317100 3.80978100 -0.65378700

H -3.70146800 1.98985400 0.02669800

C -2.54561300 4.47984700 -0.21180900

H -3.52658800 4.32022900 0.24696200

C -1.74120000 5.41349200 0.70621300

H -2.30064000 6.33837800 0.86731900

H -1.54836700 4.95040900 1.67544200

H -0.77971300 5.68693400 0.26260400

C -2.77321100 5.12411100 -1.59523000

H -3.39454600 4.49043600 -2.23256200

H -3.27436200 6.08870100 -1.47936000

H -1.82311300 5.29776300 -2.10920300

C -0.24125700 -0.80638200 -1.53394200

H -0.66037600 -1.62140400 -0.94158000

H -0.53432300 -0.96602400 -2.57675800

H 0.84663000 -0.85716900 -1.47729000

Ru -0.55564500 1.49203700 0.93184000

Cl -0.11837300 2.68957300 3.01677900

H 0.82058100 0.74695300 1.20024500
