# Supplementary material for: Intermolecular Diastereoselective Annulation of Azaarenes into Fused N-heterocycles by Ru(II) Reductive Catalysis
Source: Research Square preprint supplement (doi:10.21203/rs.3.rs-963422/v1), 2021-11-11
Supplement: Supplementary file 2 [file 63d43326971afb81087bcd6a.docx]

**Supplementary Information**

**NMR spectra of the obtained compounds**

**1H-NMR spectrum of C1**


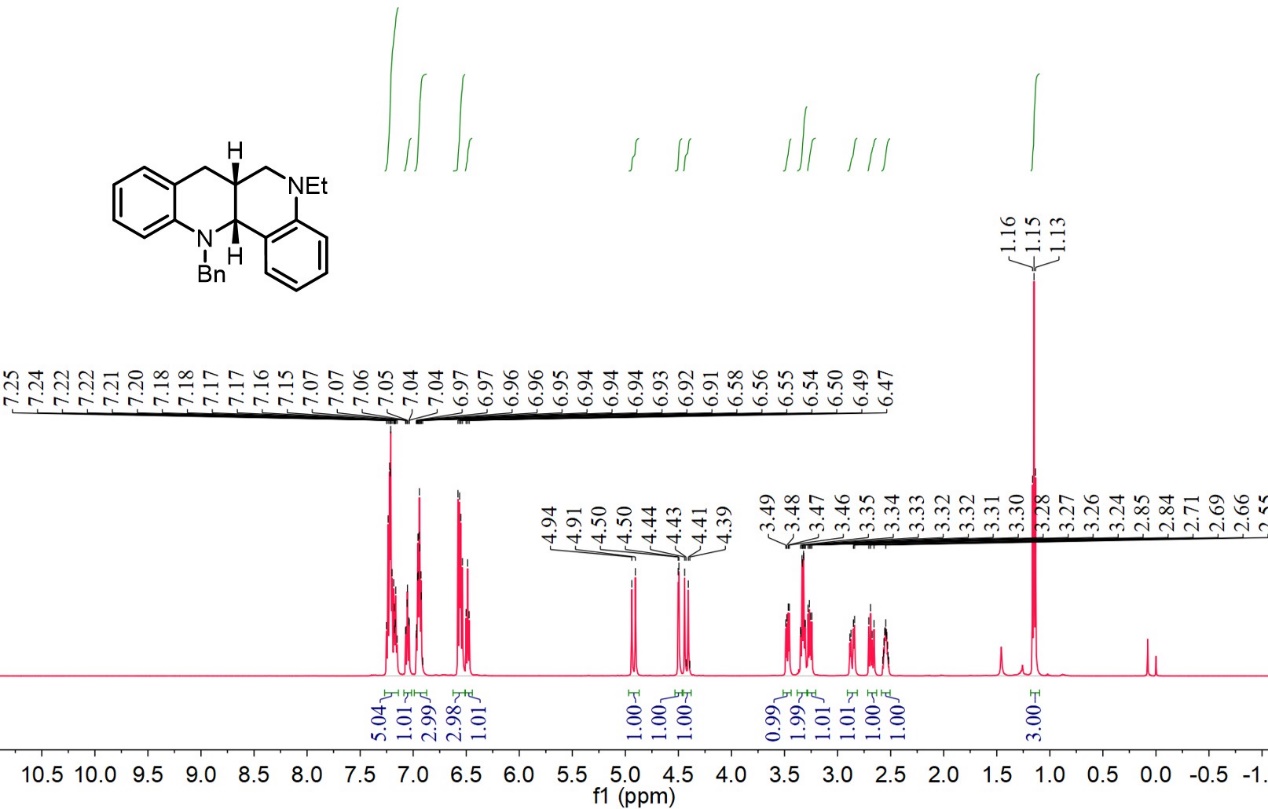


**13C-NMR spectrum of C1**


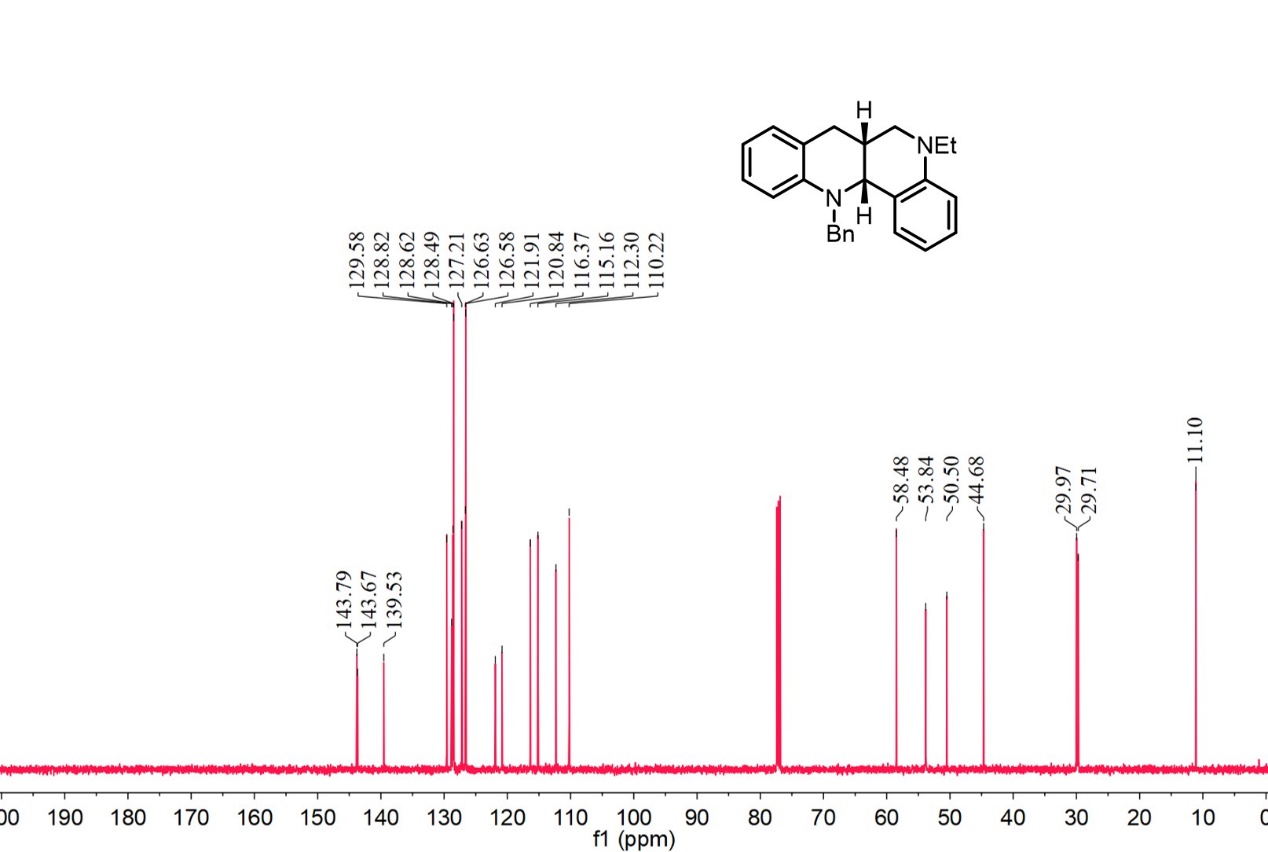


**1H-NMR spectrum of C2**


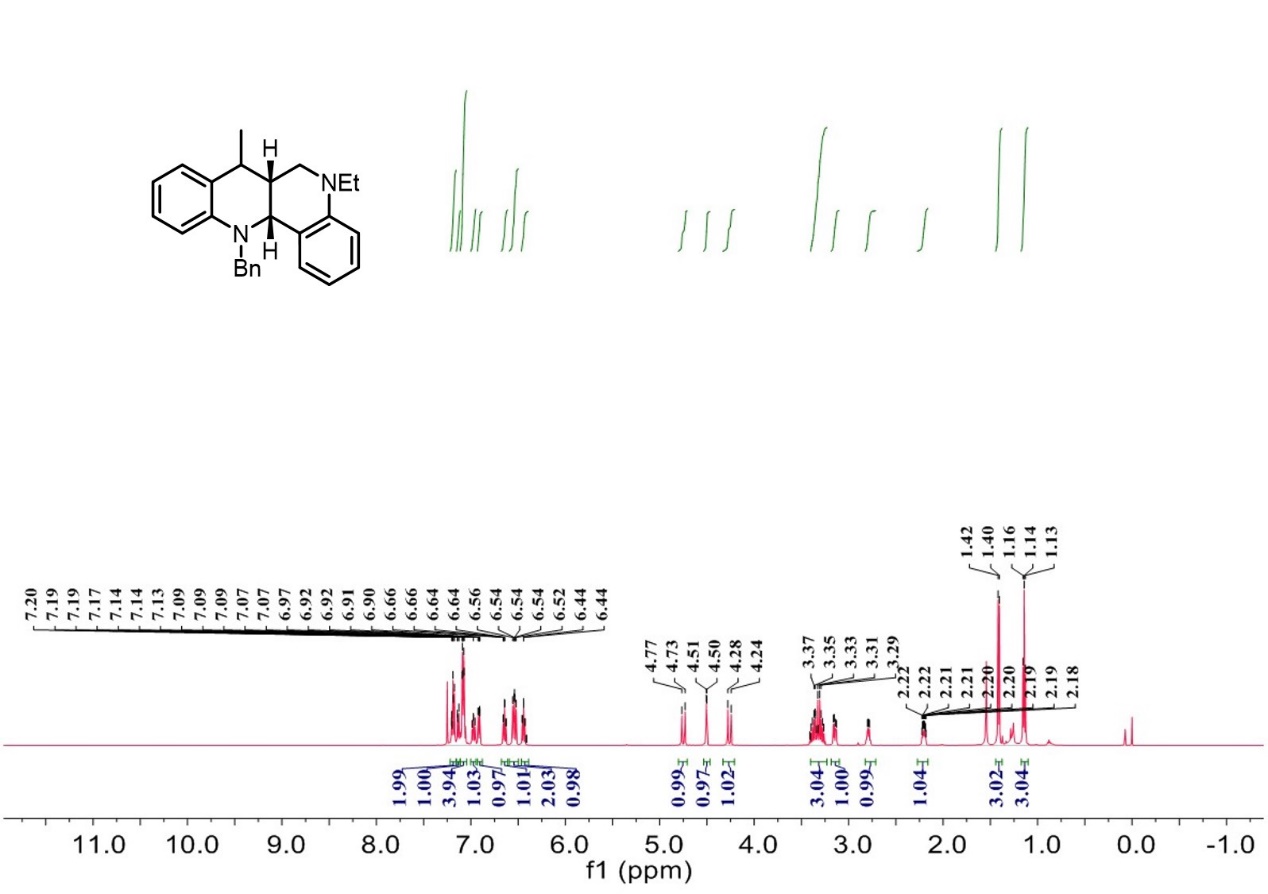


**13C-NMR spectrum of C2**

**
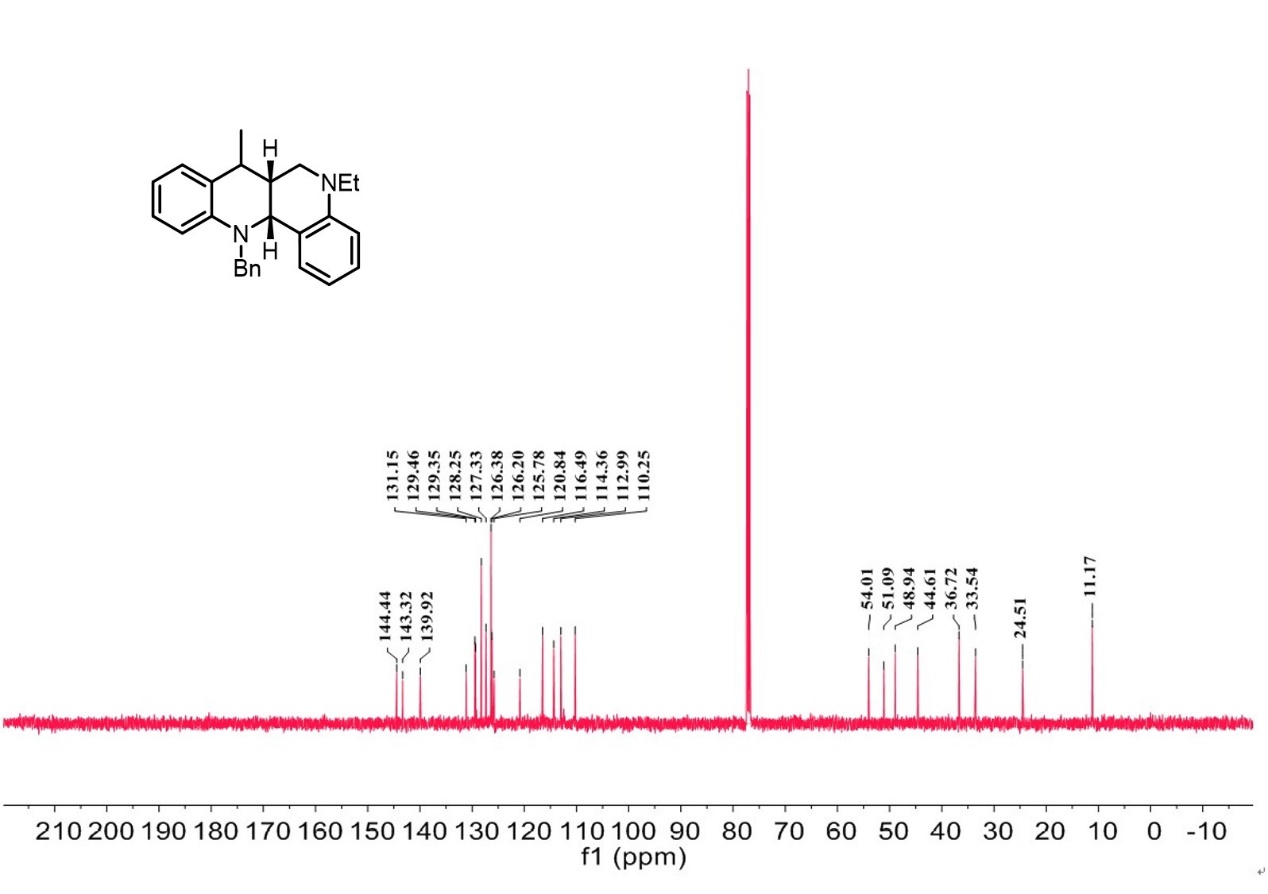
**

**1H-NMR spectrum of C3**

**
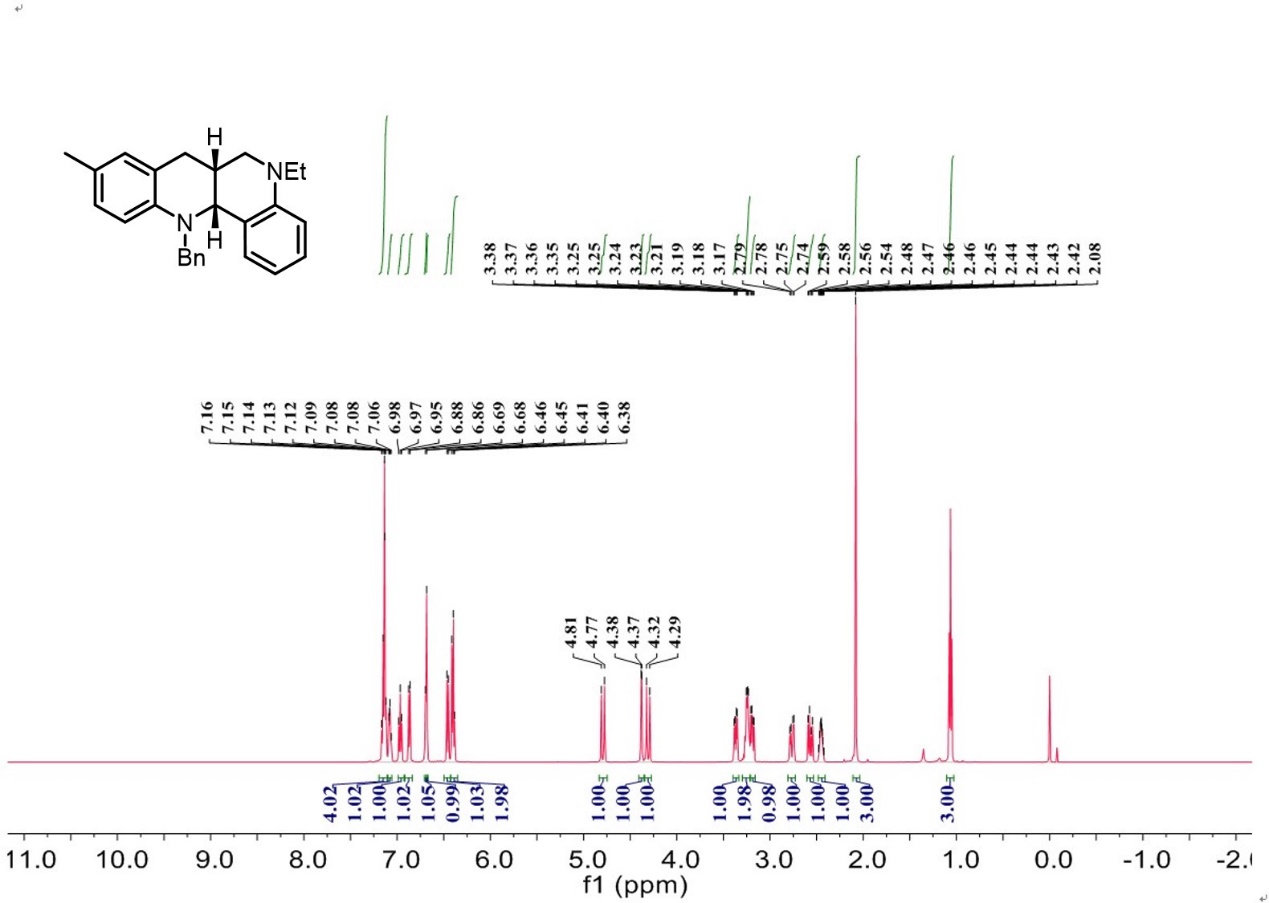
**

**13C-NMR spectrum of C3**


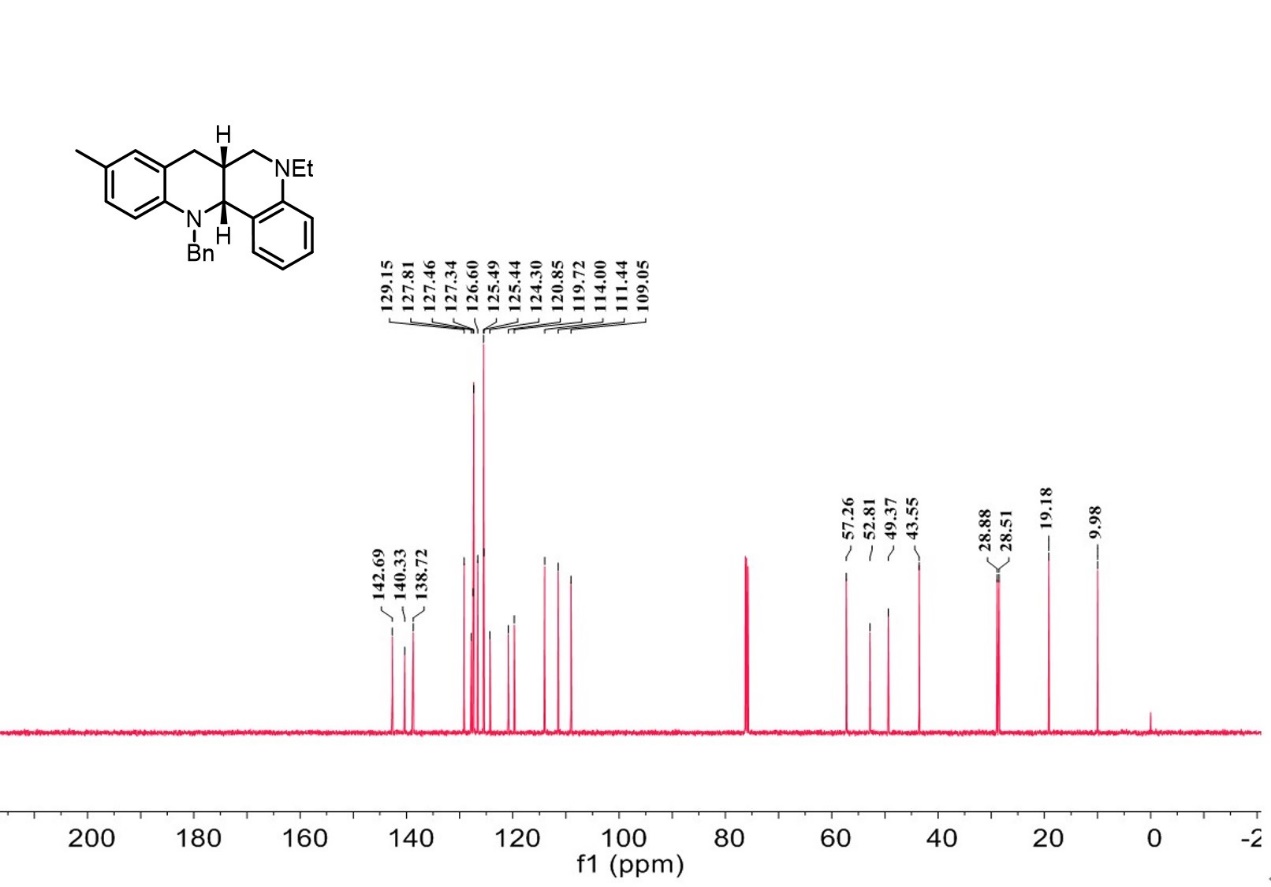


**1H-NMR spectrum of C4**

**
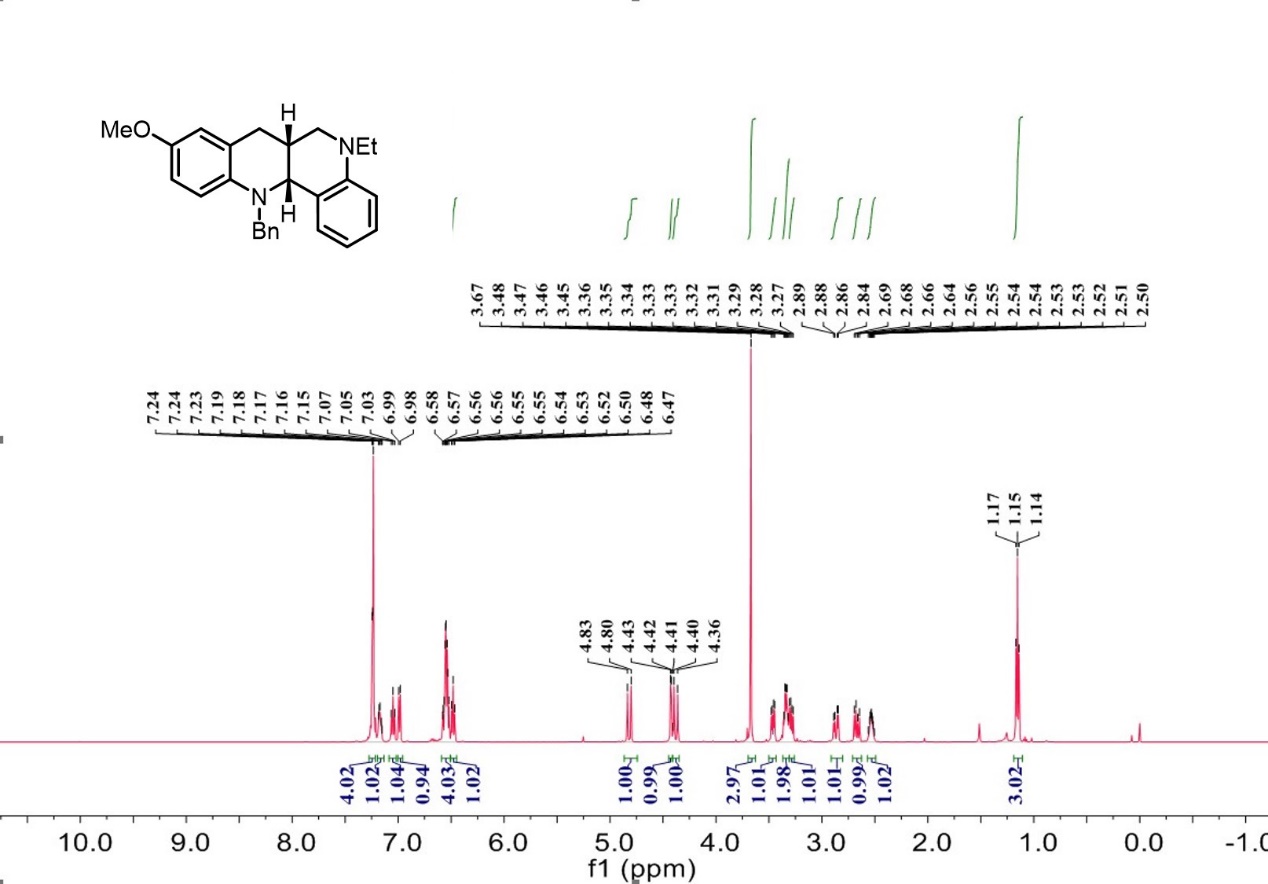
**

**13C-NMR spectrum of C4**

**
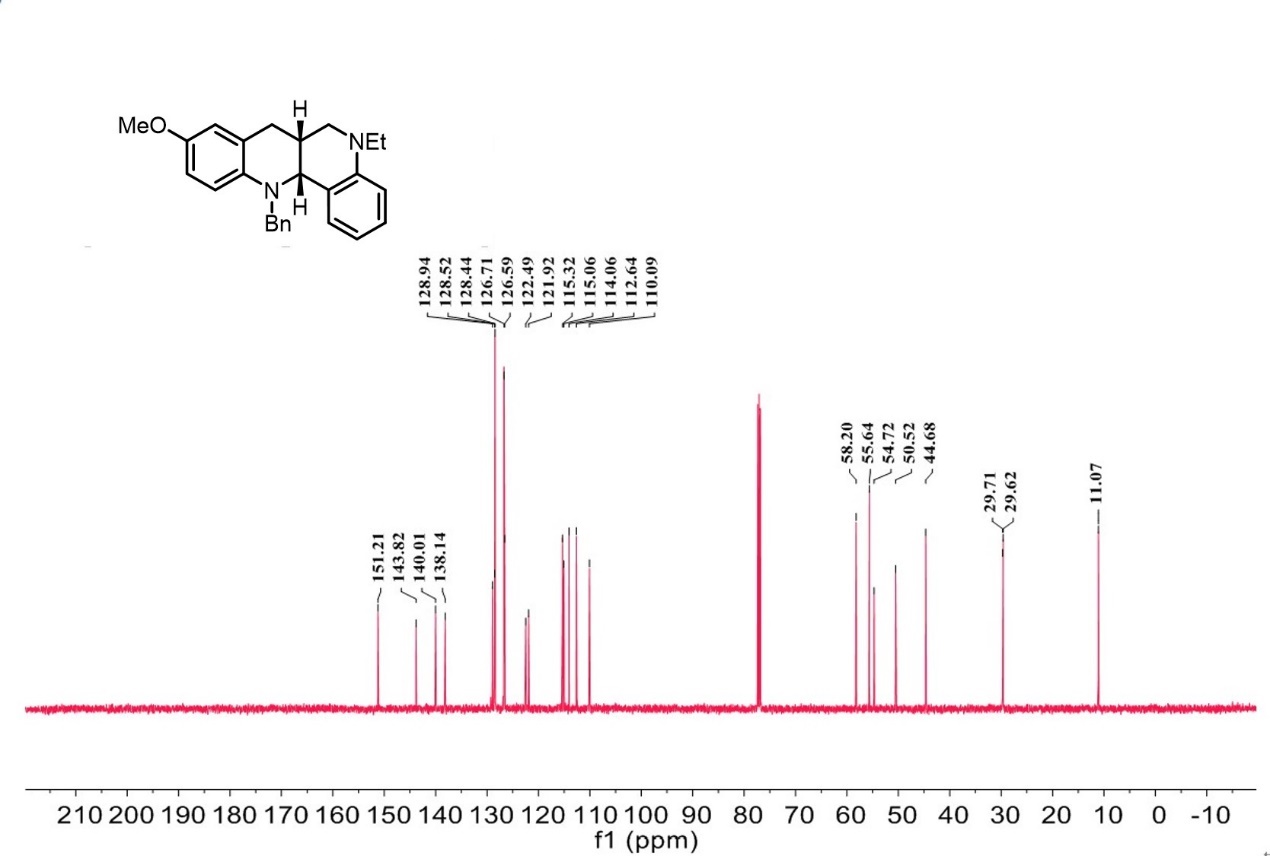
**

**1H-NMR spectrum of C5**

**
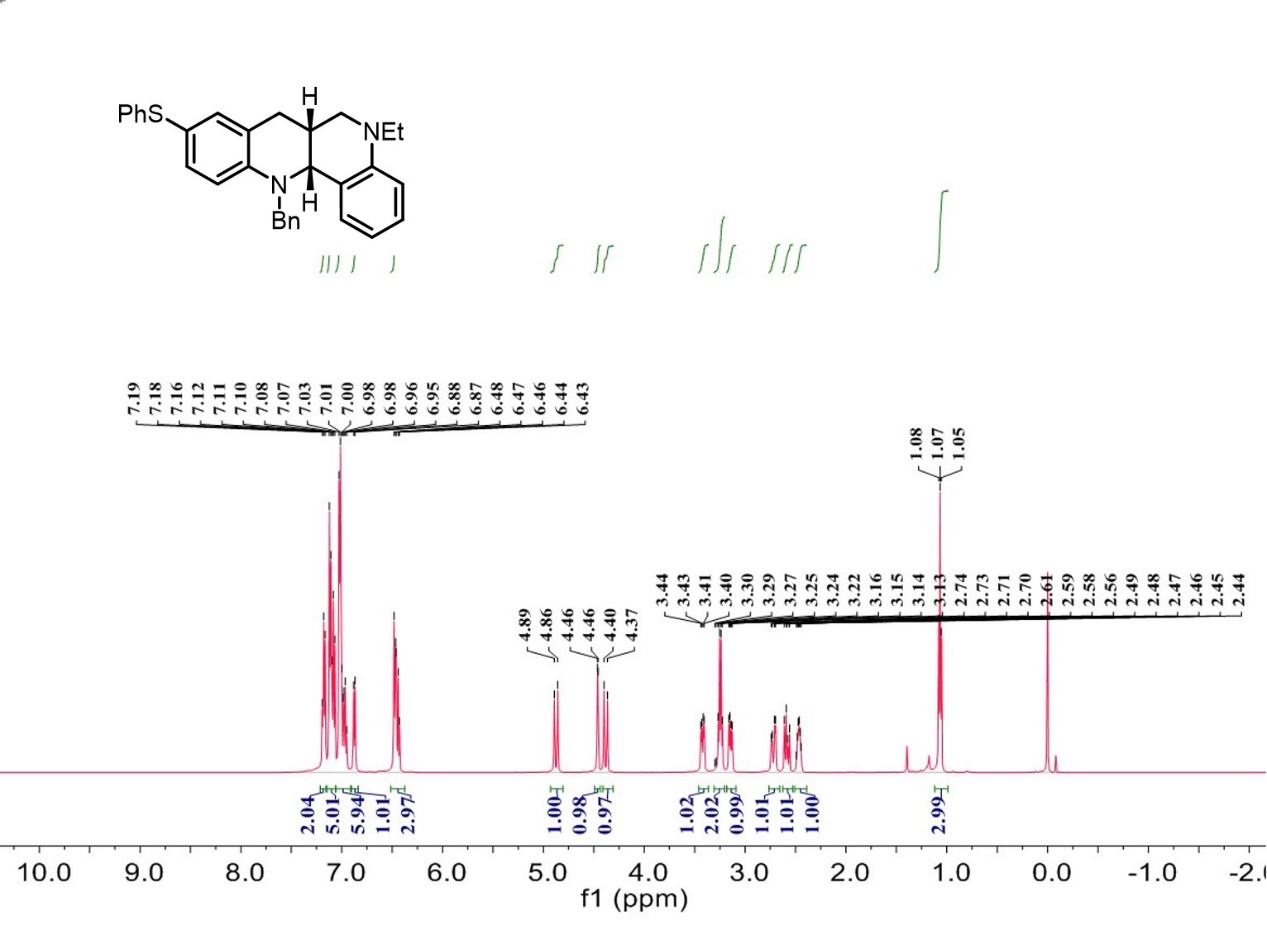
**

**13C-NMR spectrum of C5**

**
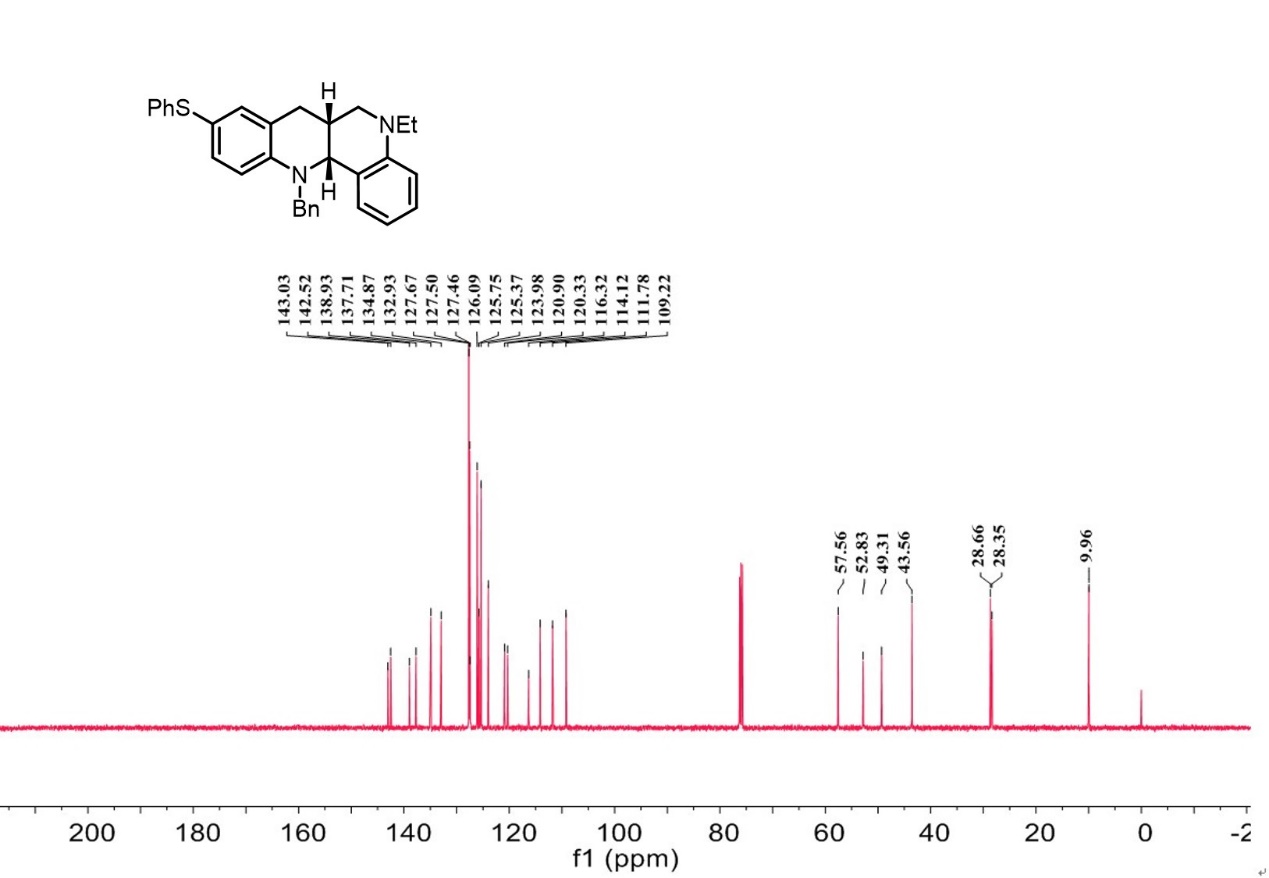
**

**1H-NMR spectrum of C6**

**
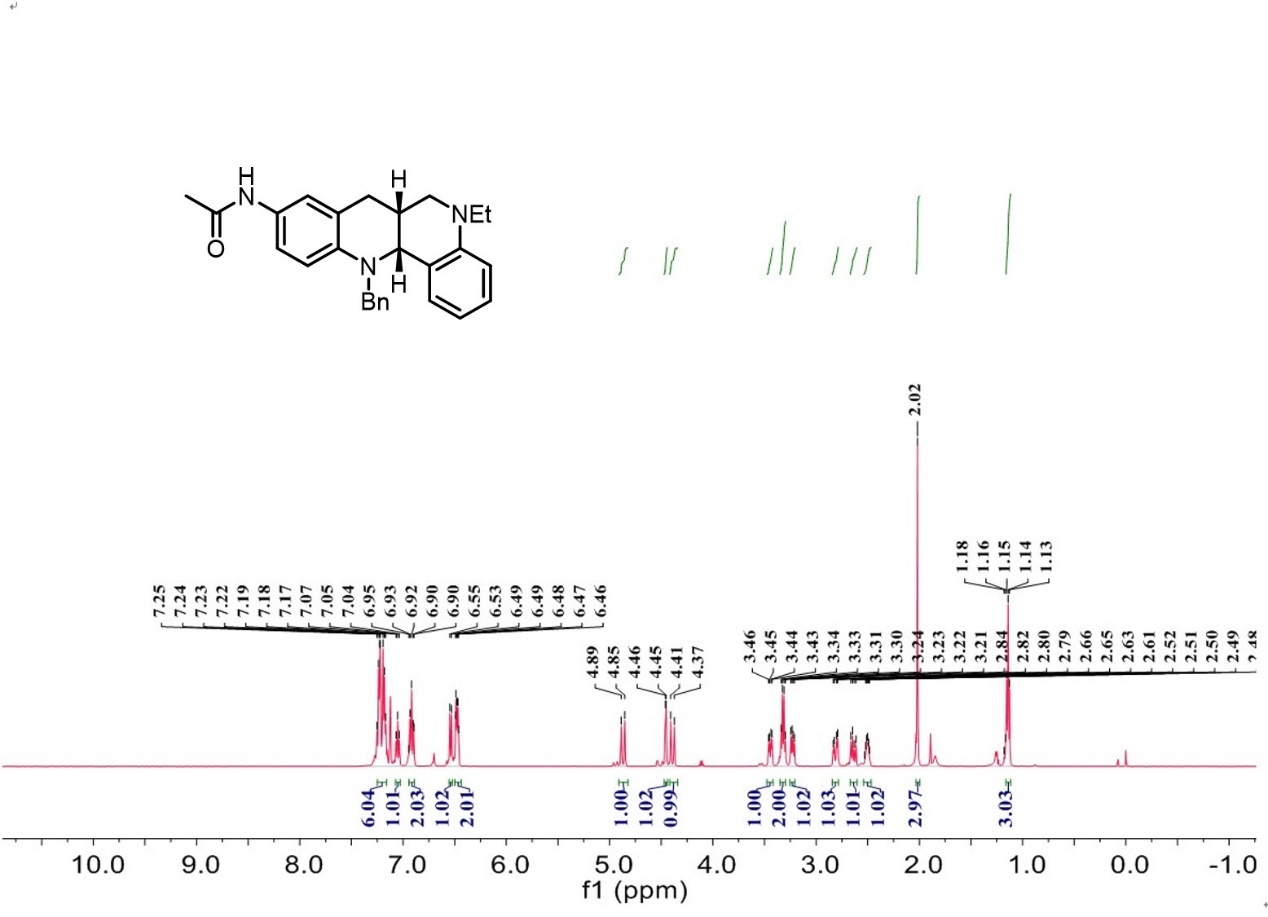
**

**13C-NMR spectrum of C6**


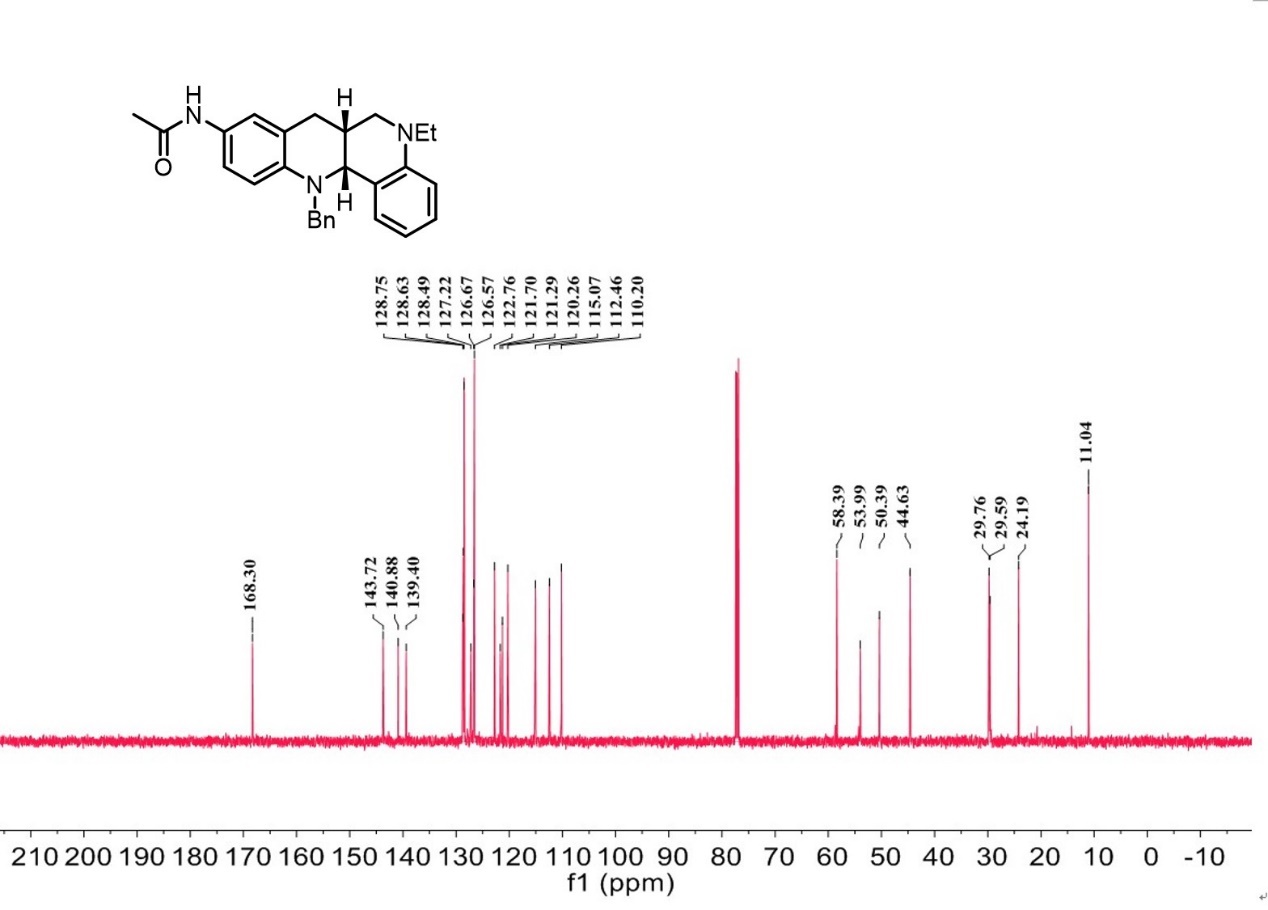


**1H-NMR spectrum of C7**

**
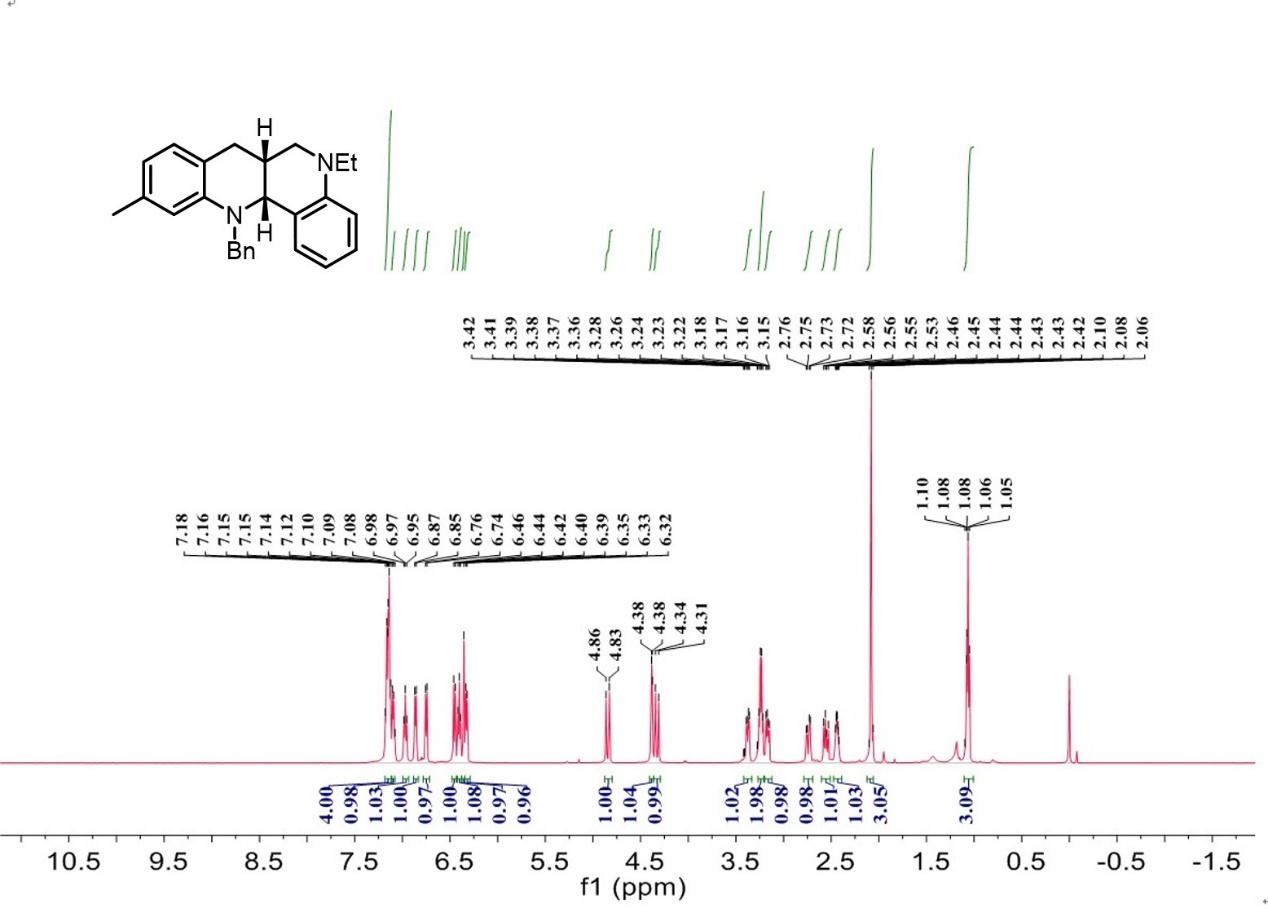
**

**13C-NMR spectrum of C7**

**
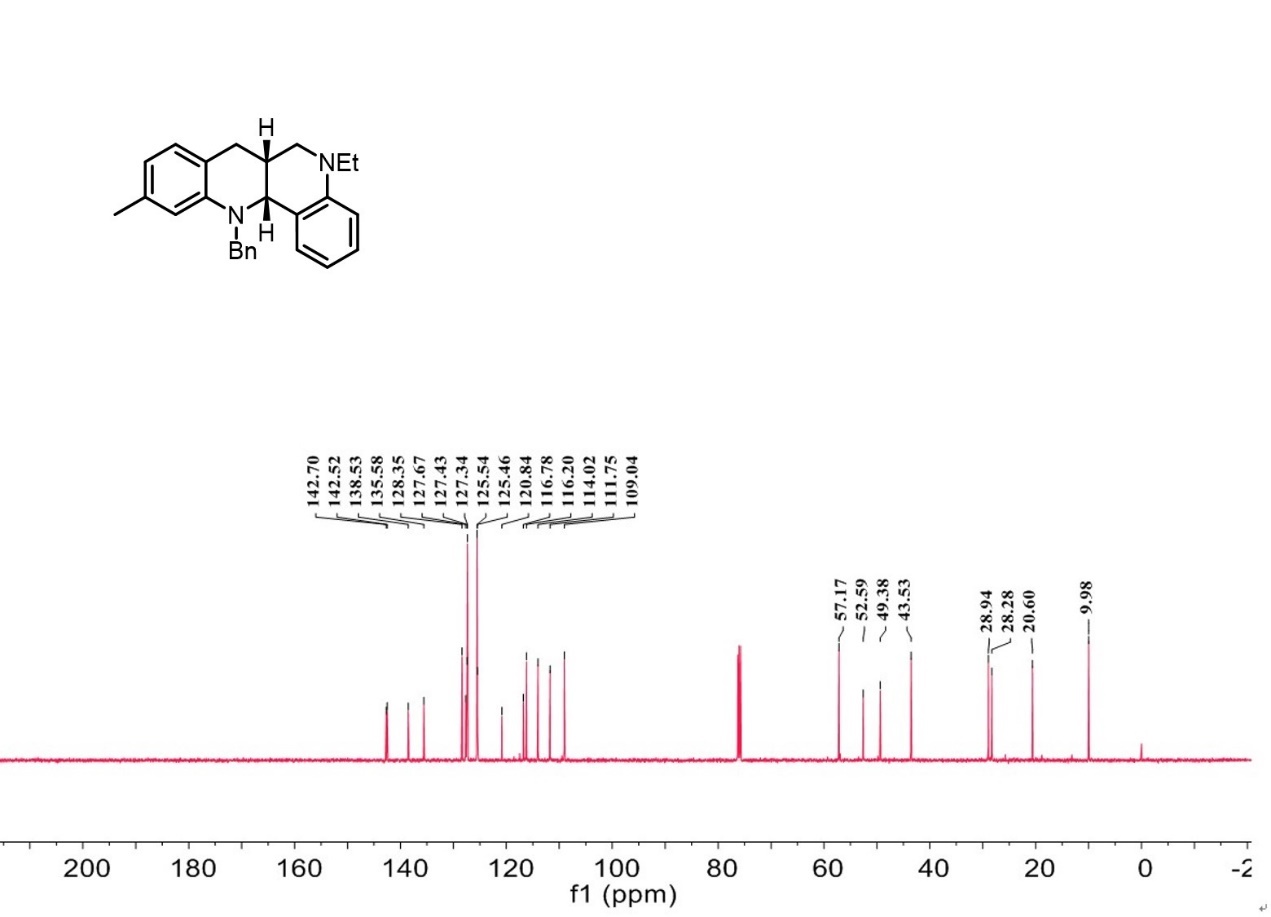
**

**1H-NMR spectrum of C8**

**
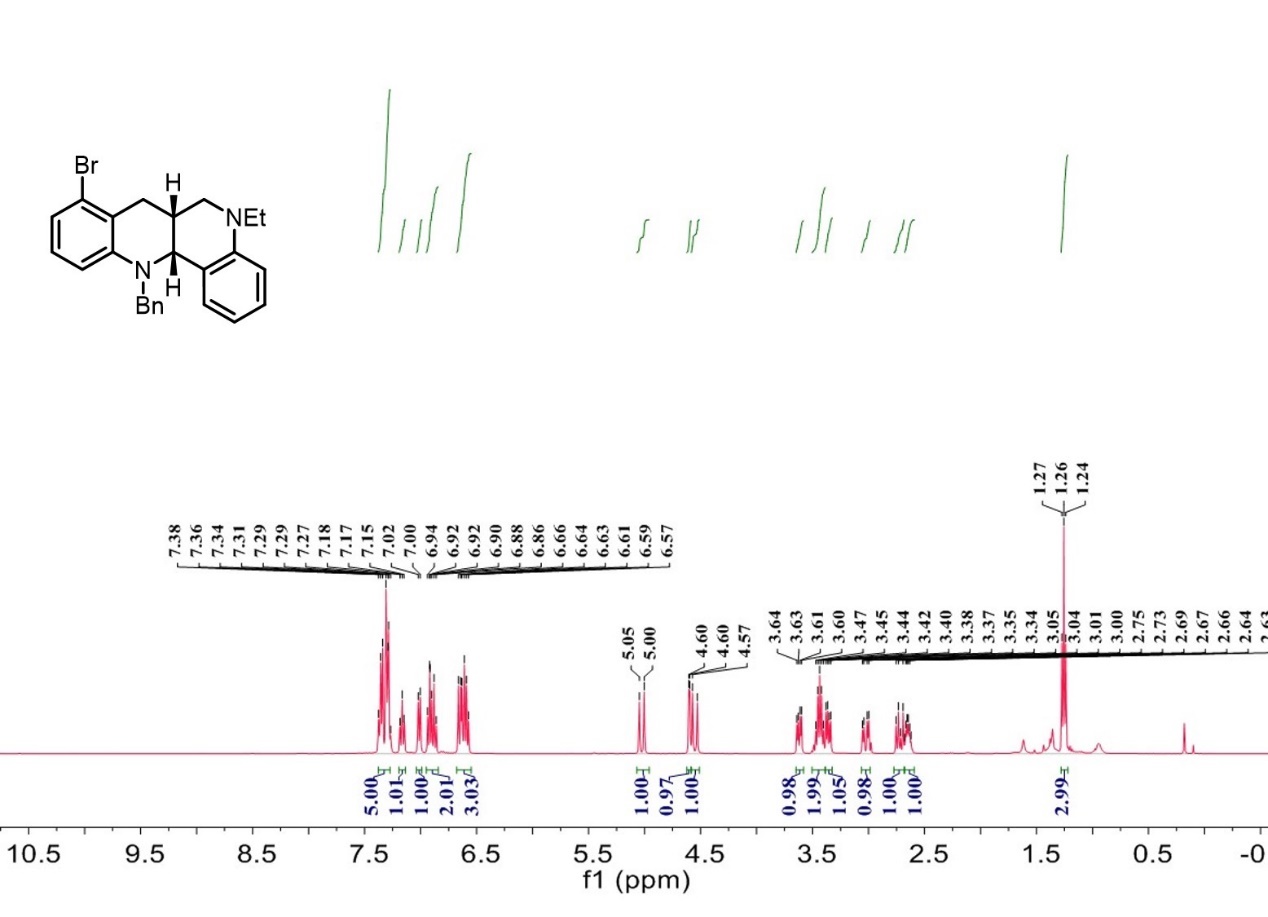
**

**13C-NMR spectrum of C8**

**
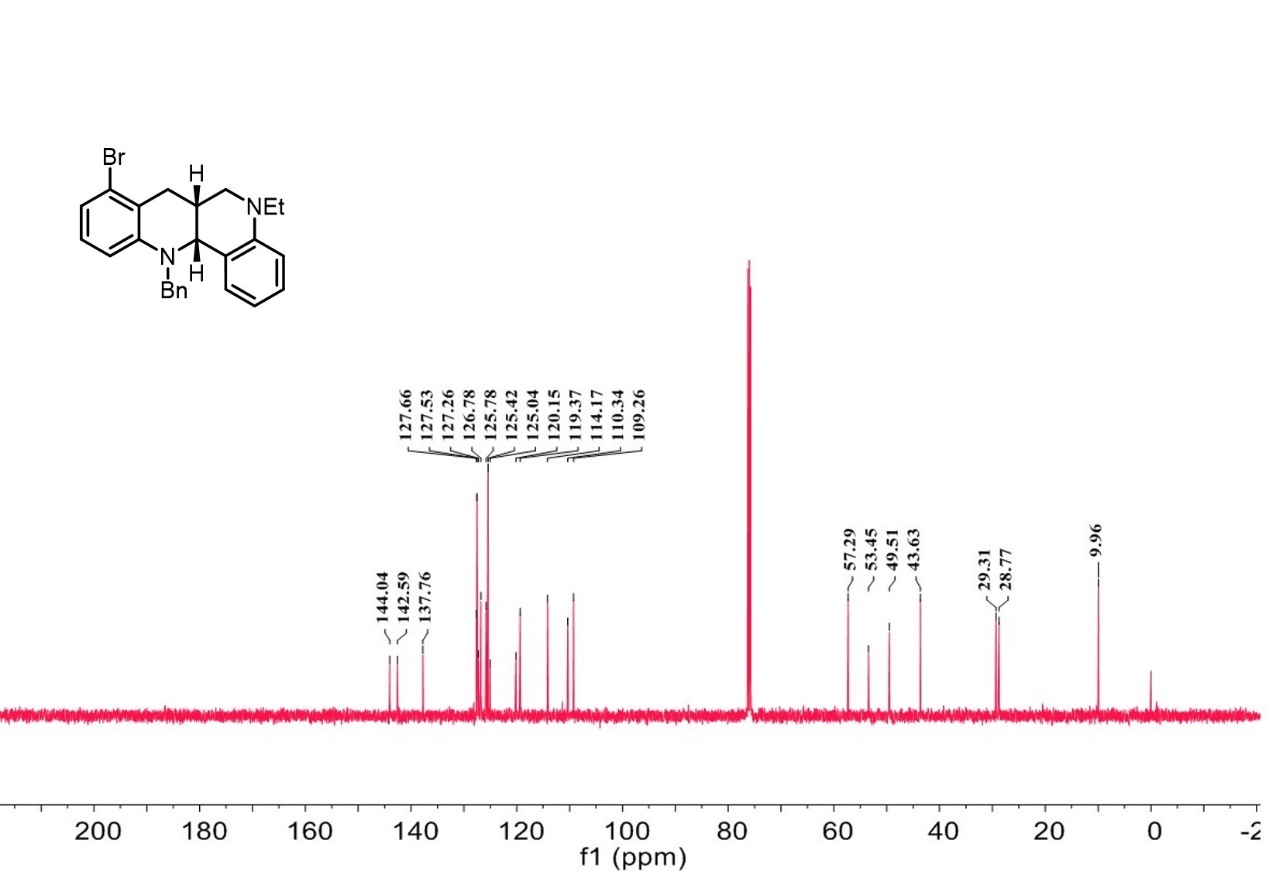
**

**1H-NMR spectrum of C9**

**
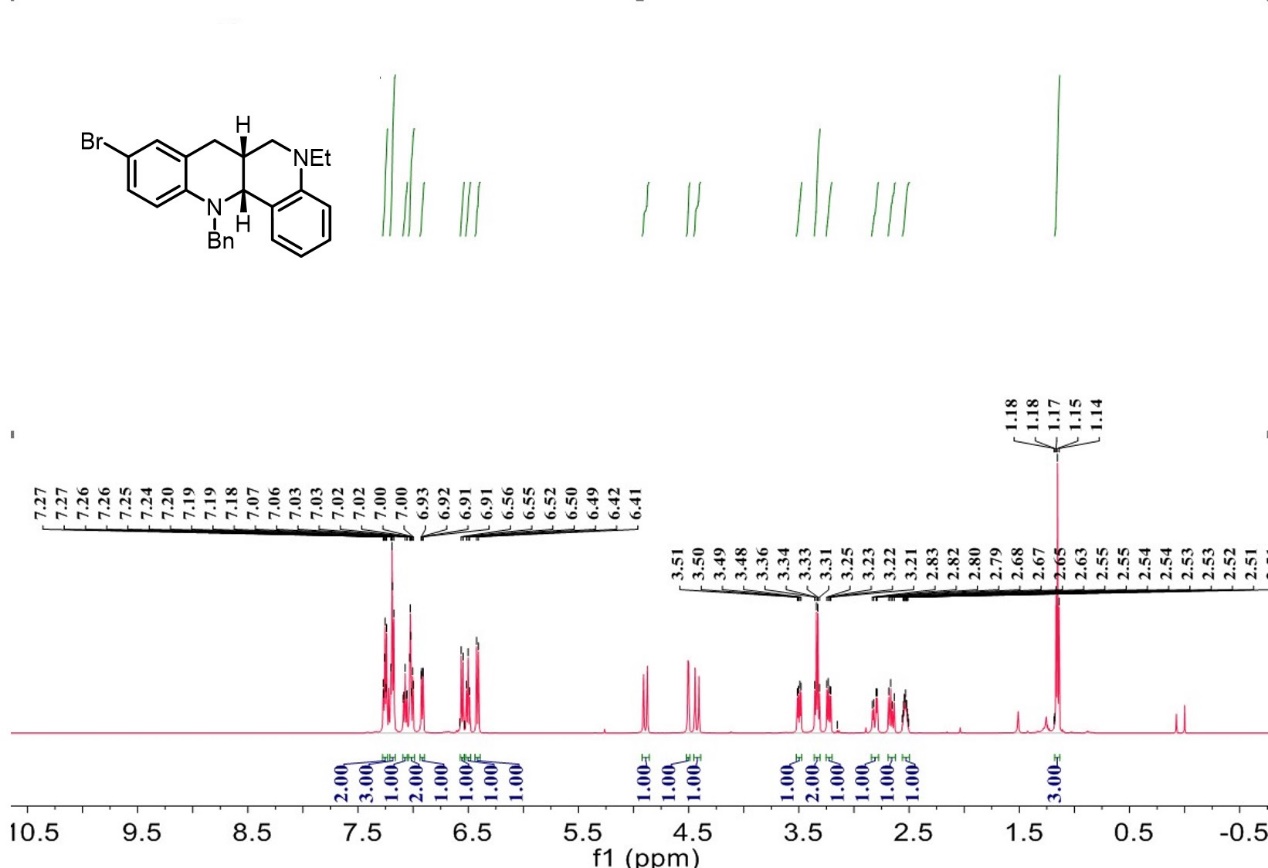
**

**13C-NMR spectrum of C9**


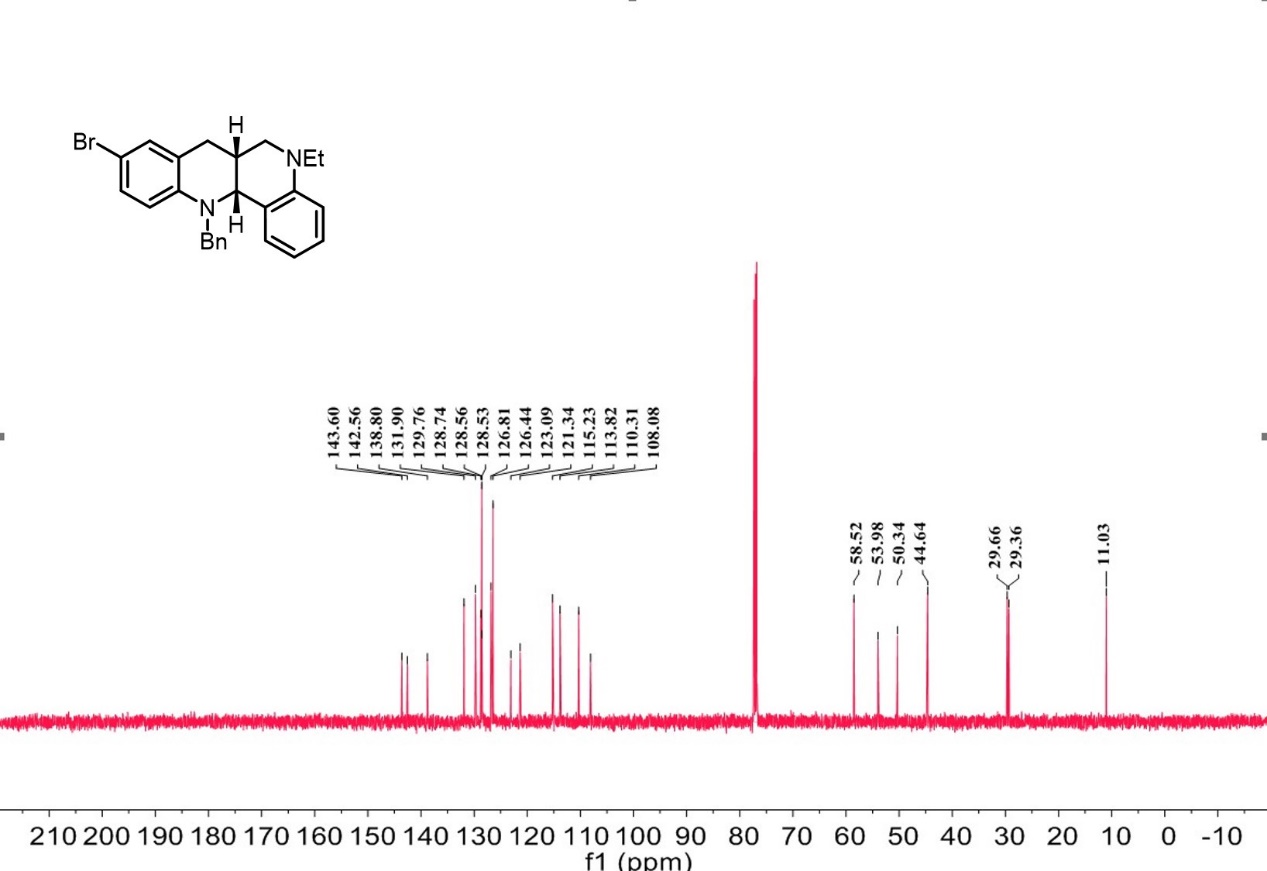


**1H-NMR spectrum of C10**


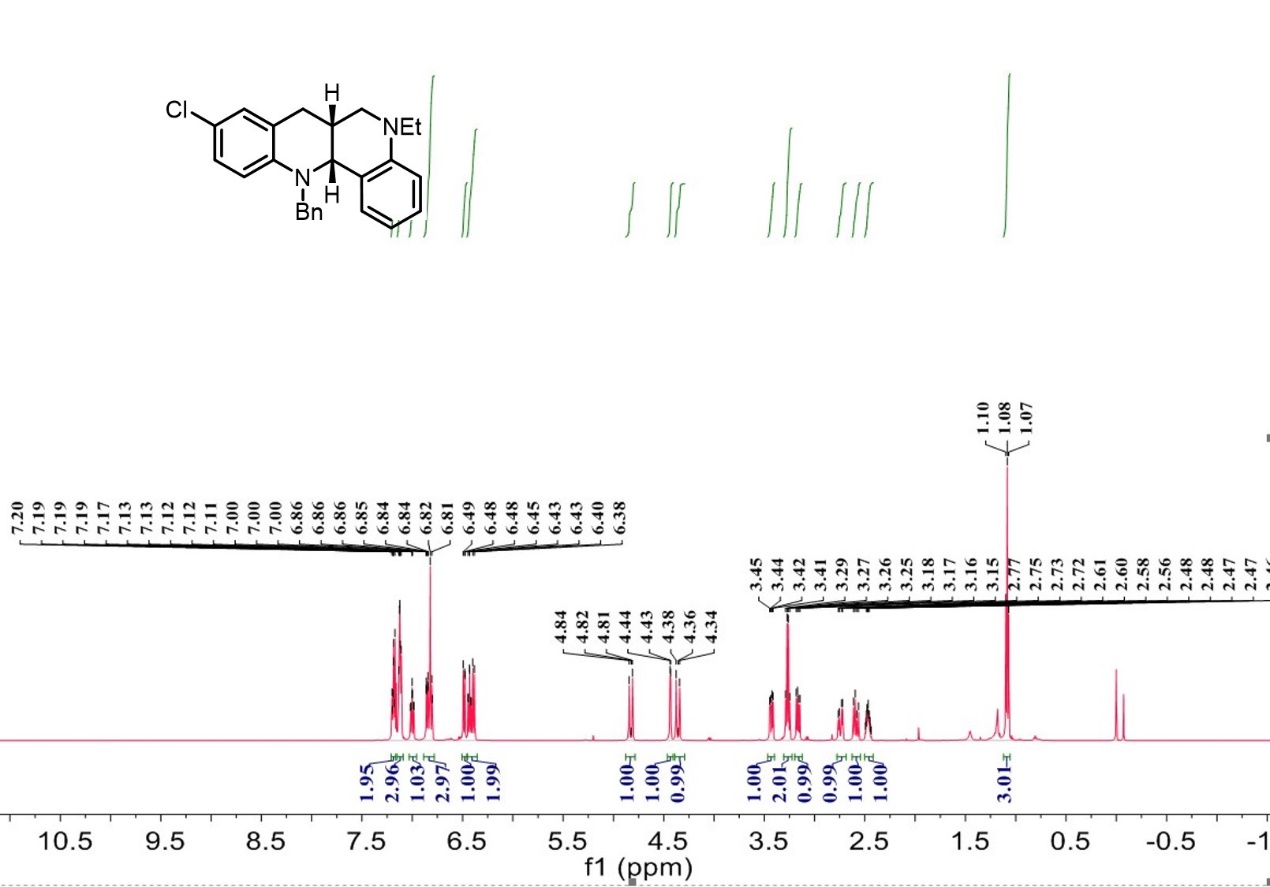


**13C-NMR spectrum of C10
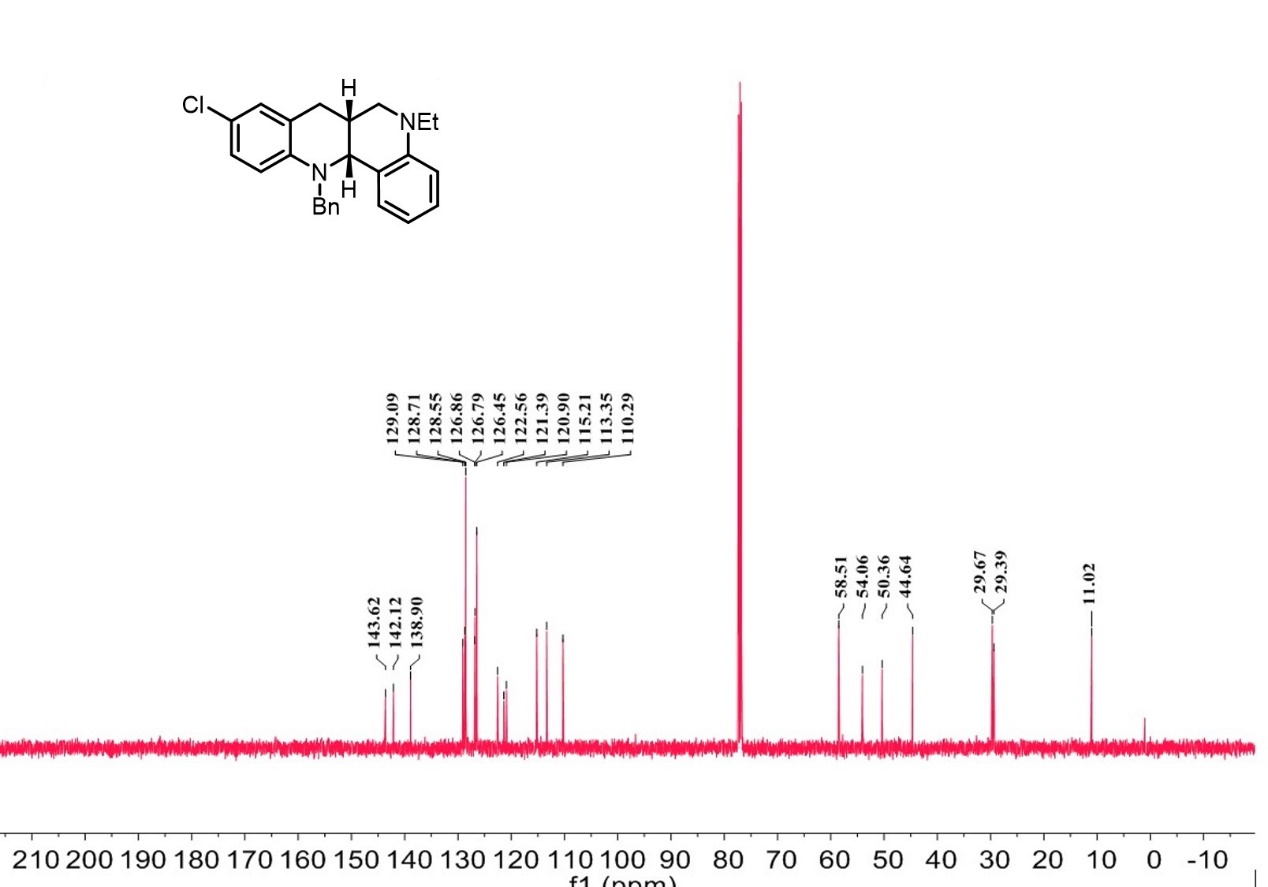
**

**1H-NMR spectrum of C11**

**
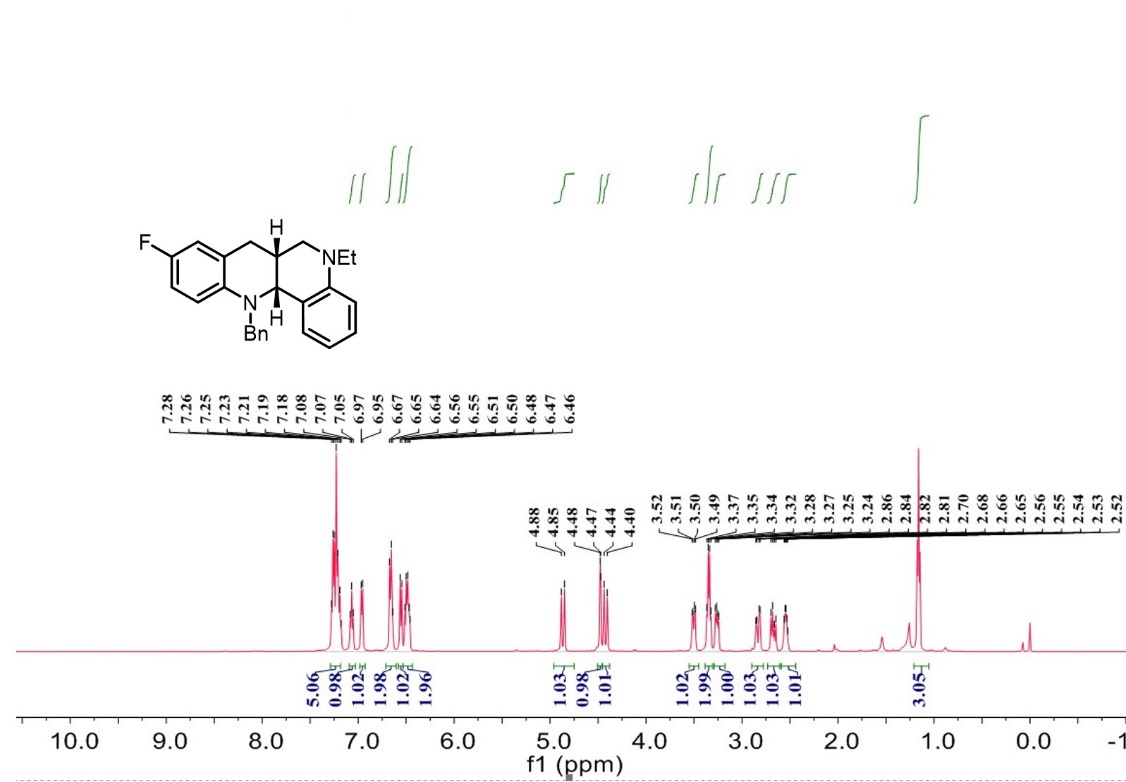
**

**13C-NMR spectrum of C11**


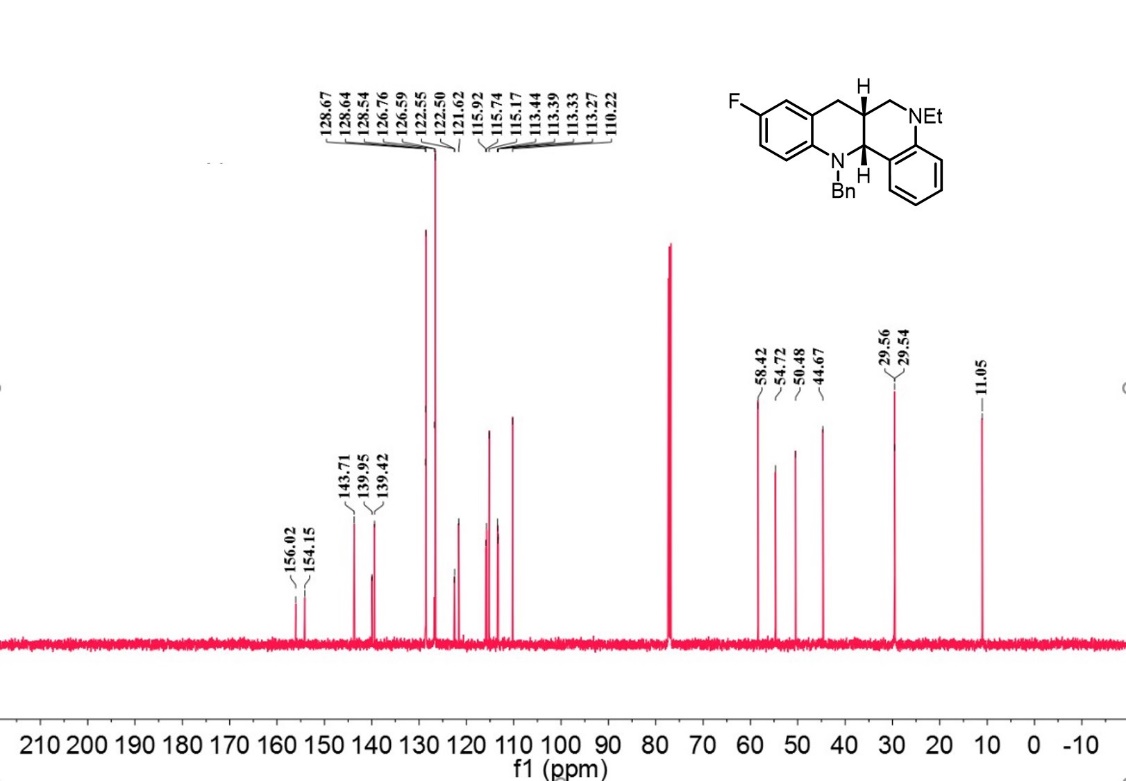


**19F-NMR spectrum of C11**


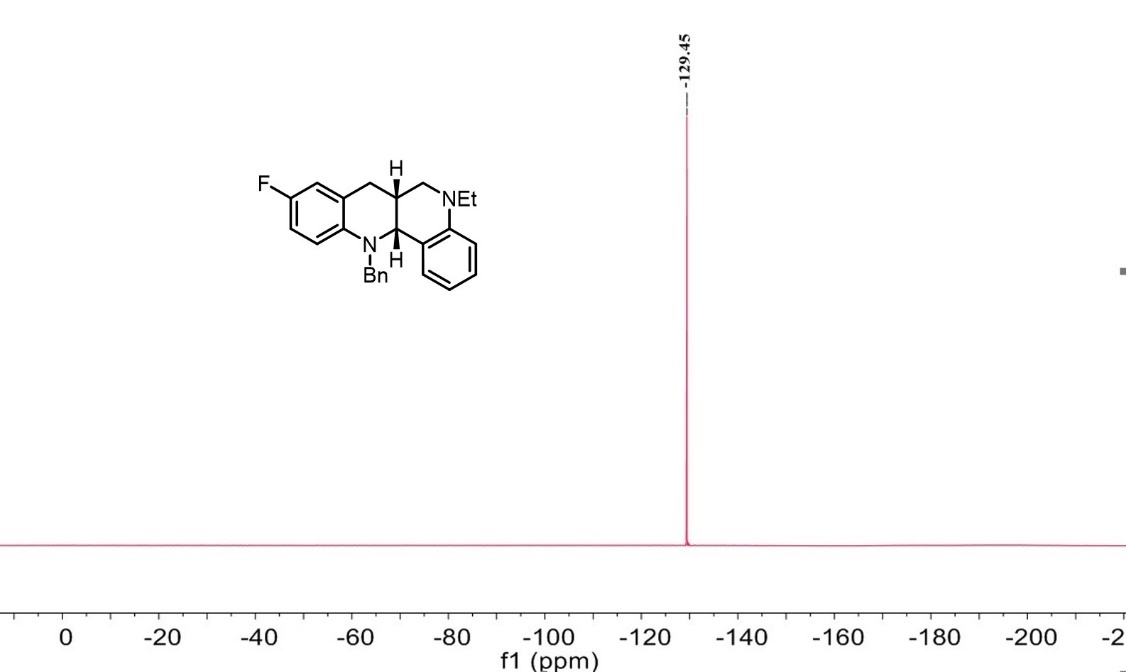


**1H-NMR spectrum of C12**

**
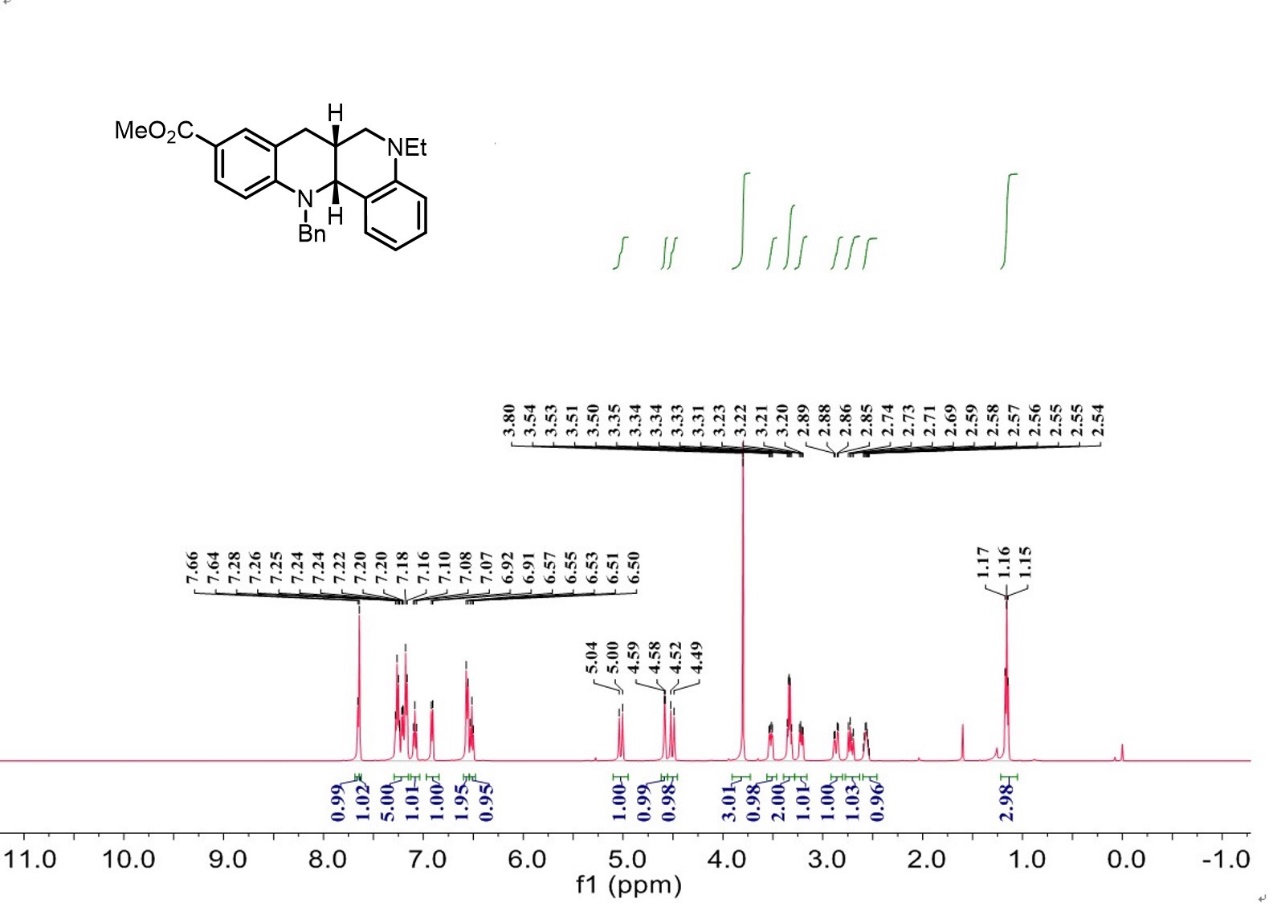
**

**13C-NMR spectrum of C12**


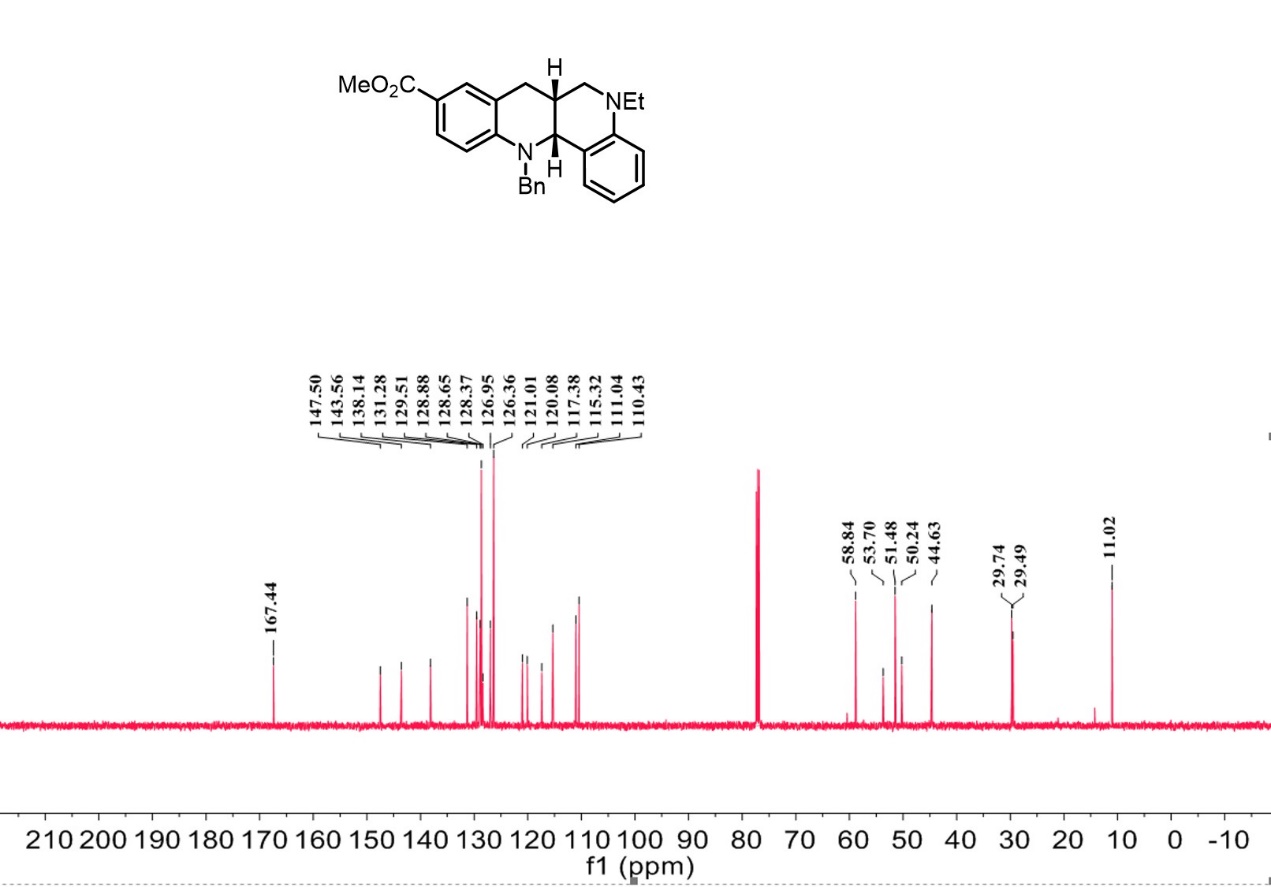


**1H-NMR spectrum of C13**

**
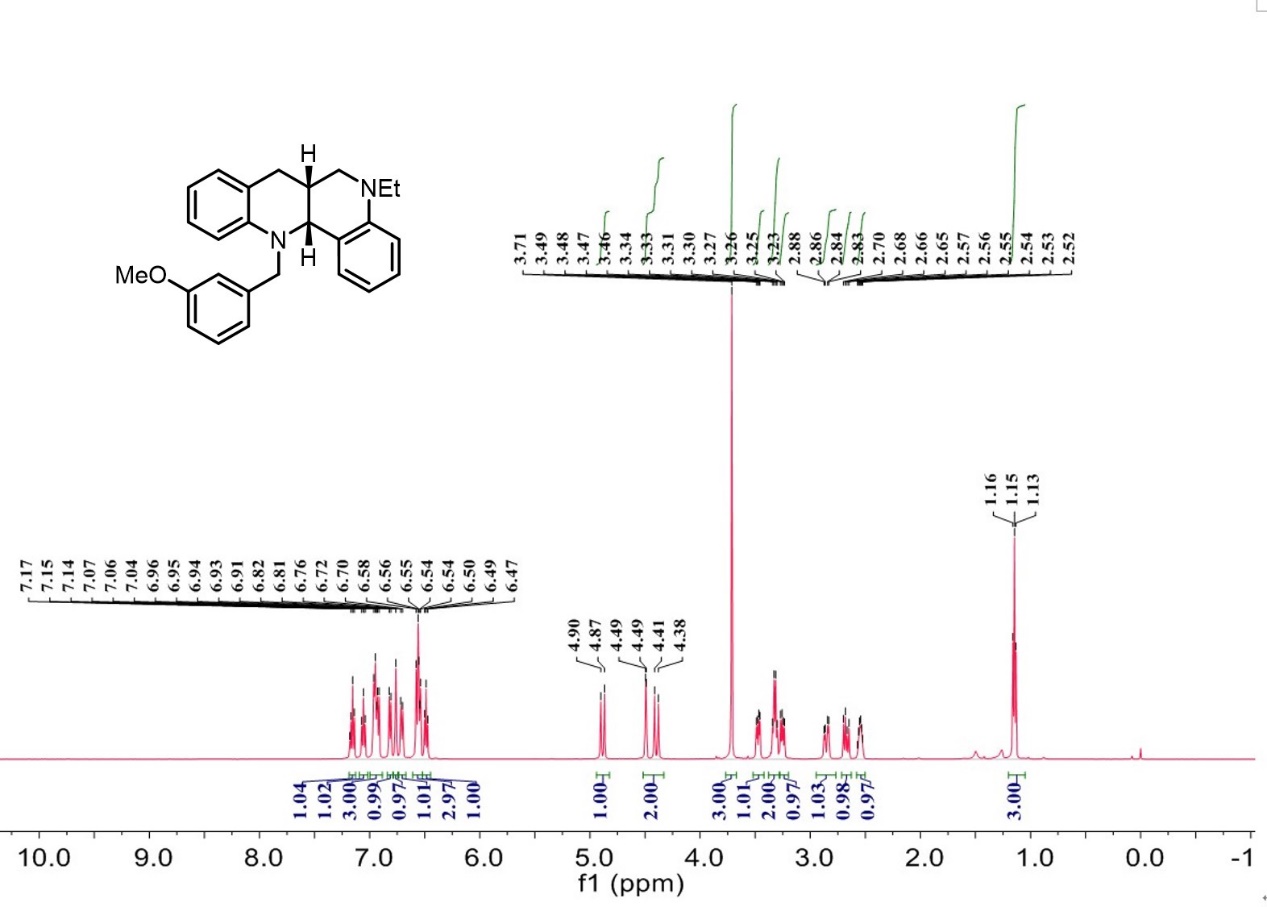
**

**13C-NMR spectrum of C13**


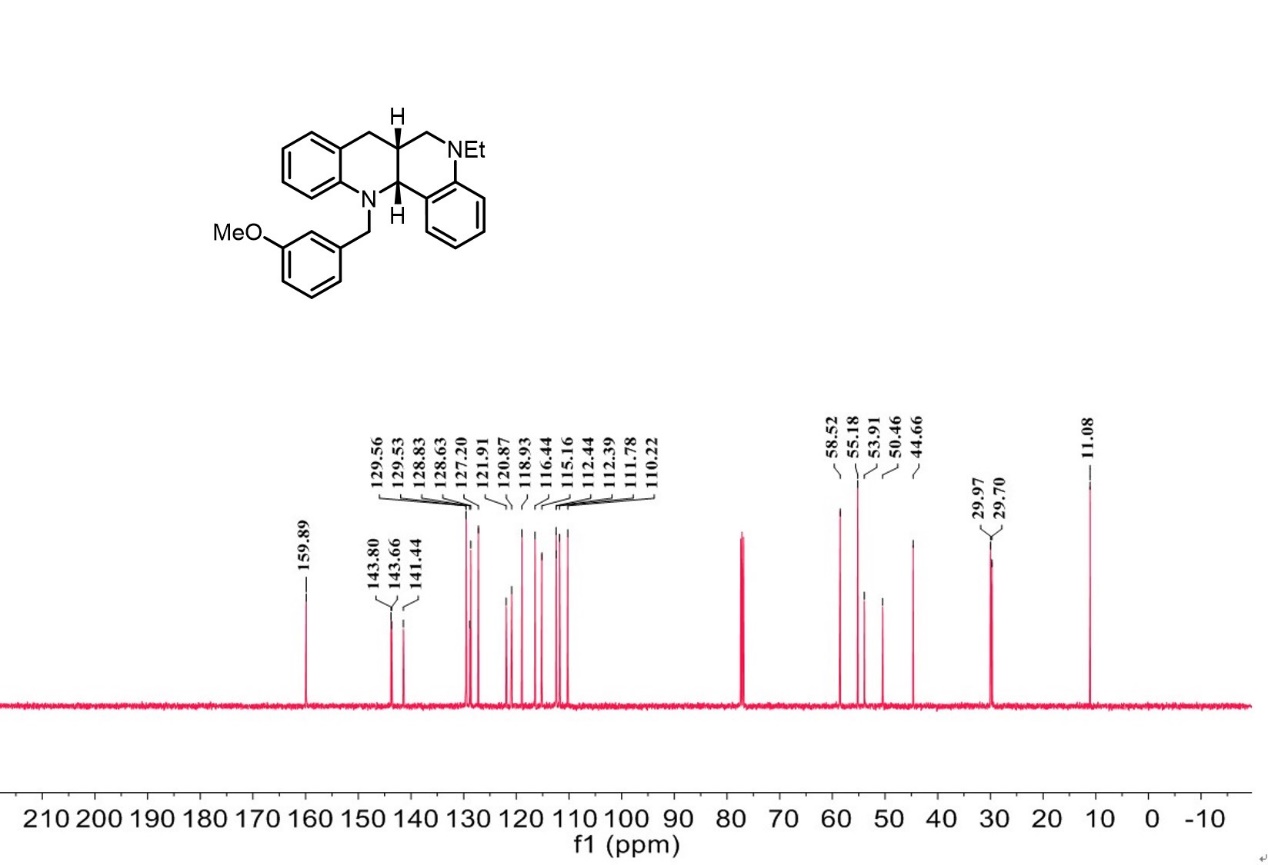


**1H-NMR spectrum of C14**

**
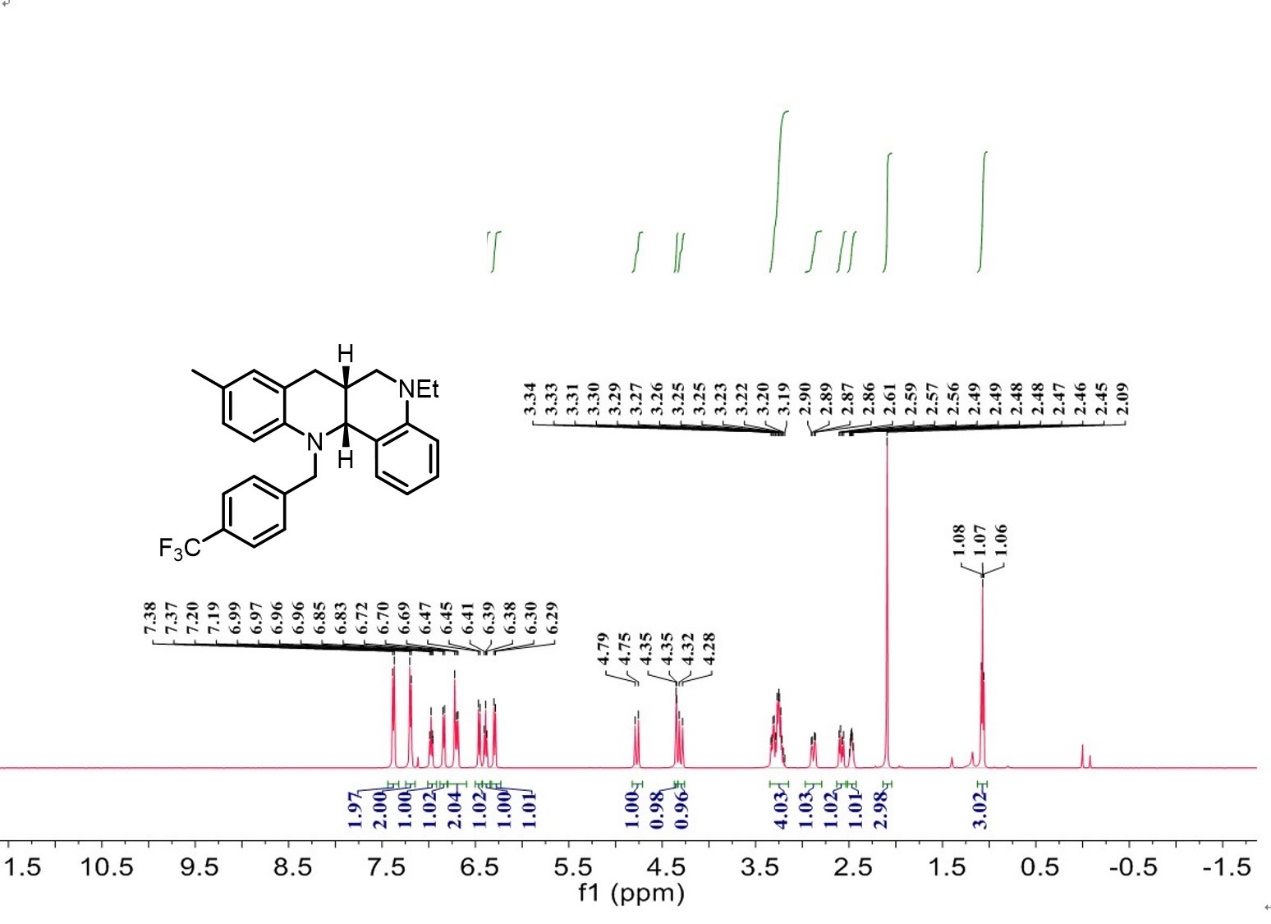
**

**13C-NMR spectrum of C14**

**
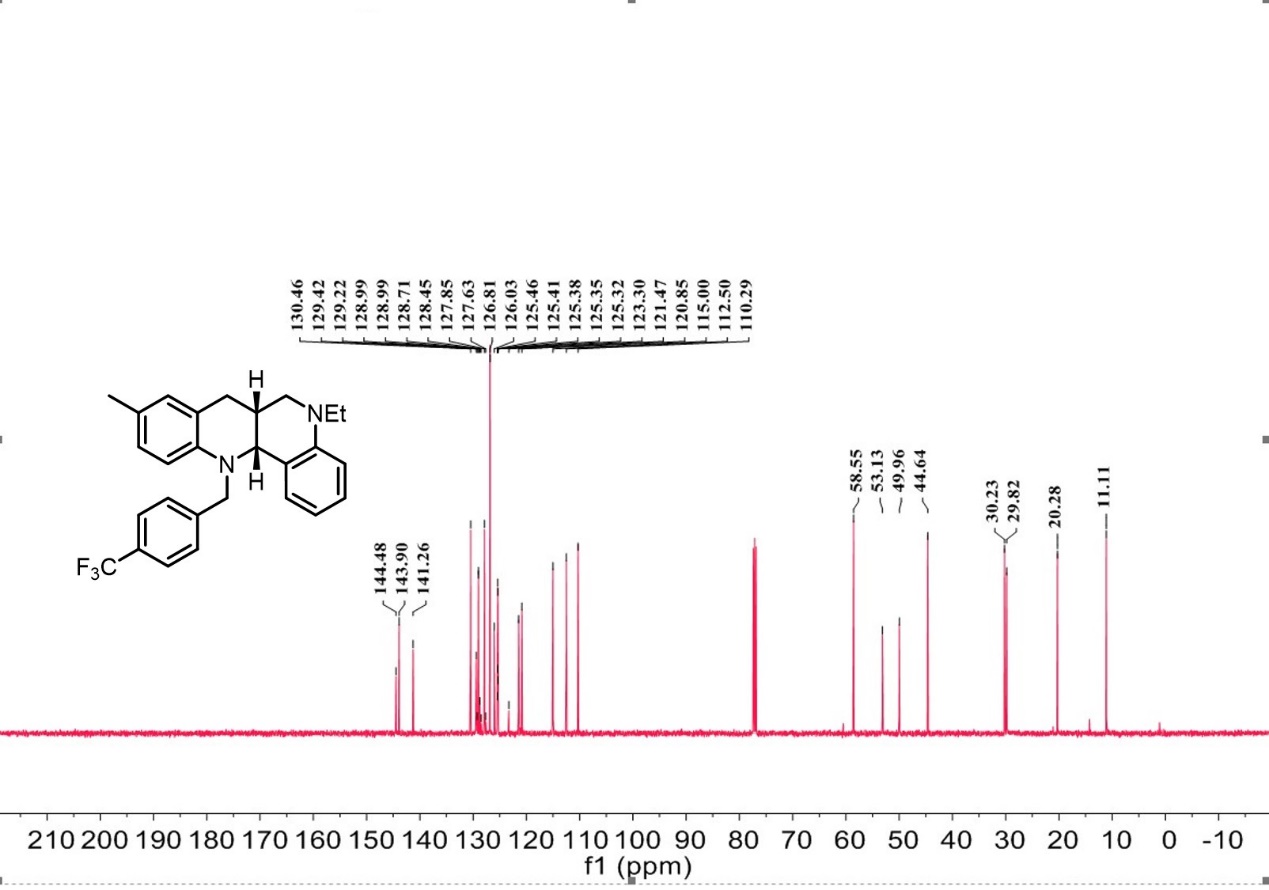
**

**19F-NMR spectrum of C14**

**
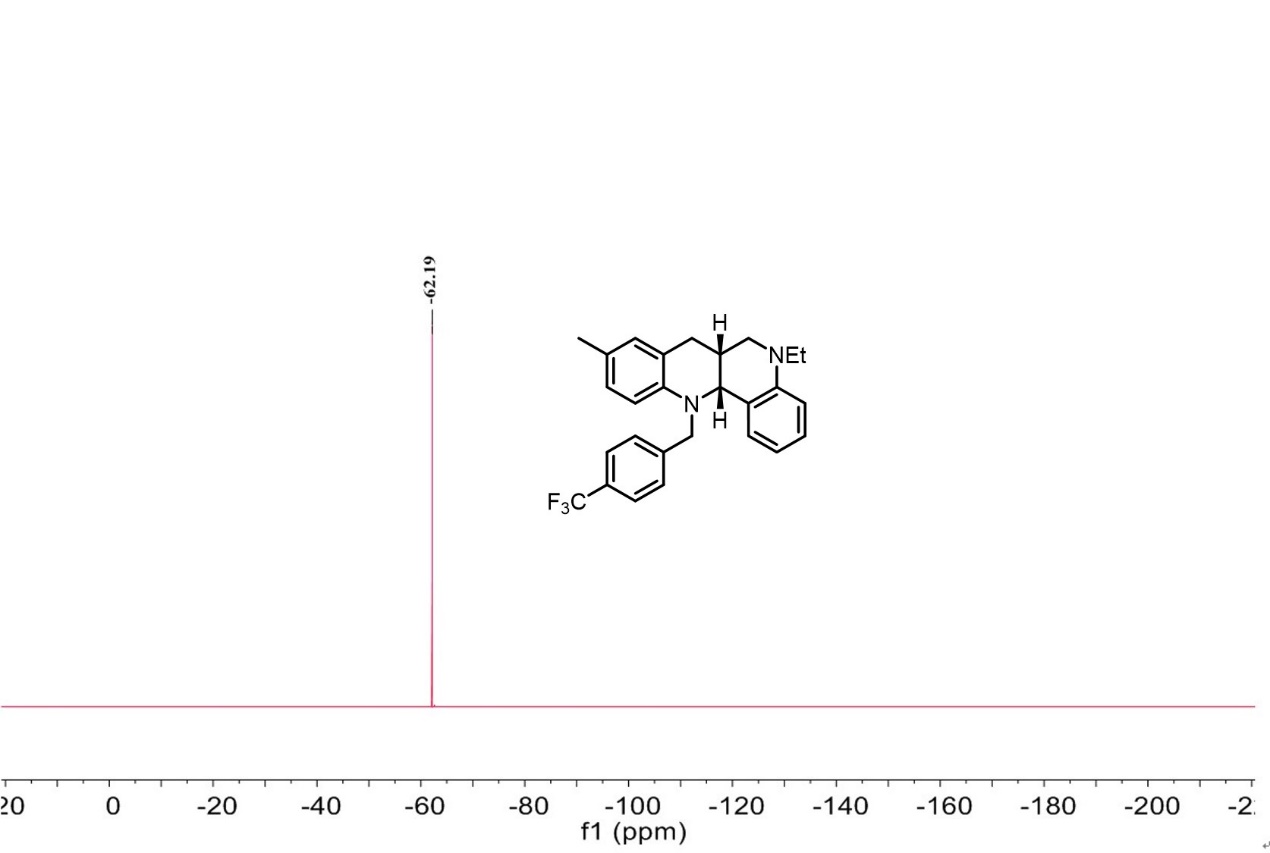
**

**1H-NMR spectrum of C15**

**
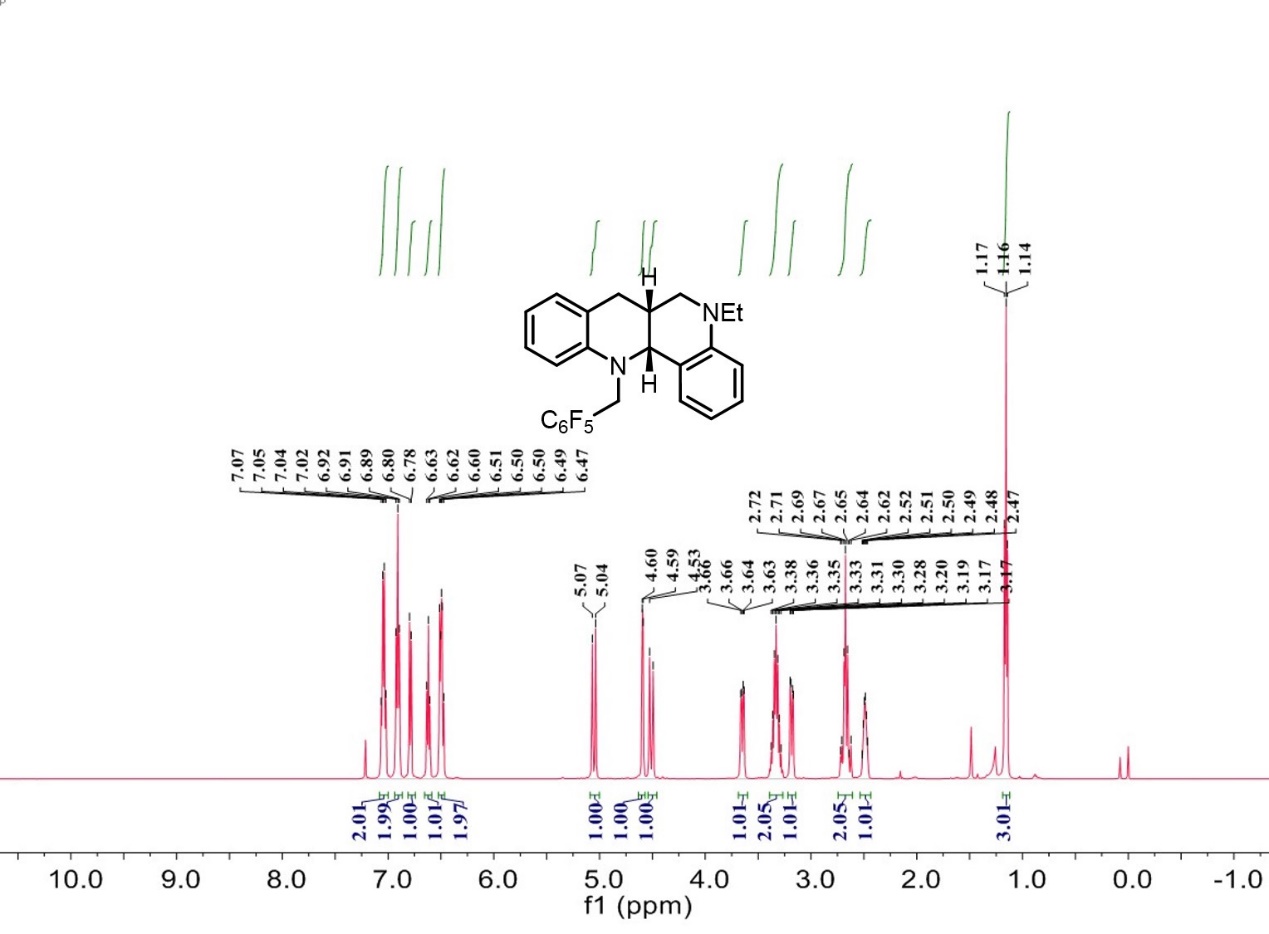
**

**13C-NMR spectrum of C15**

**
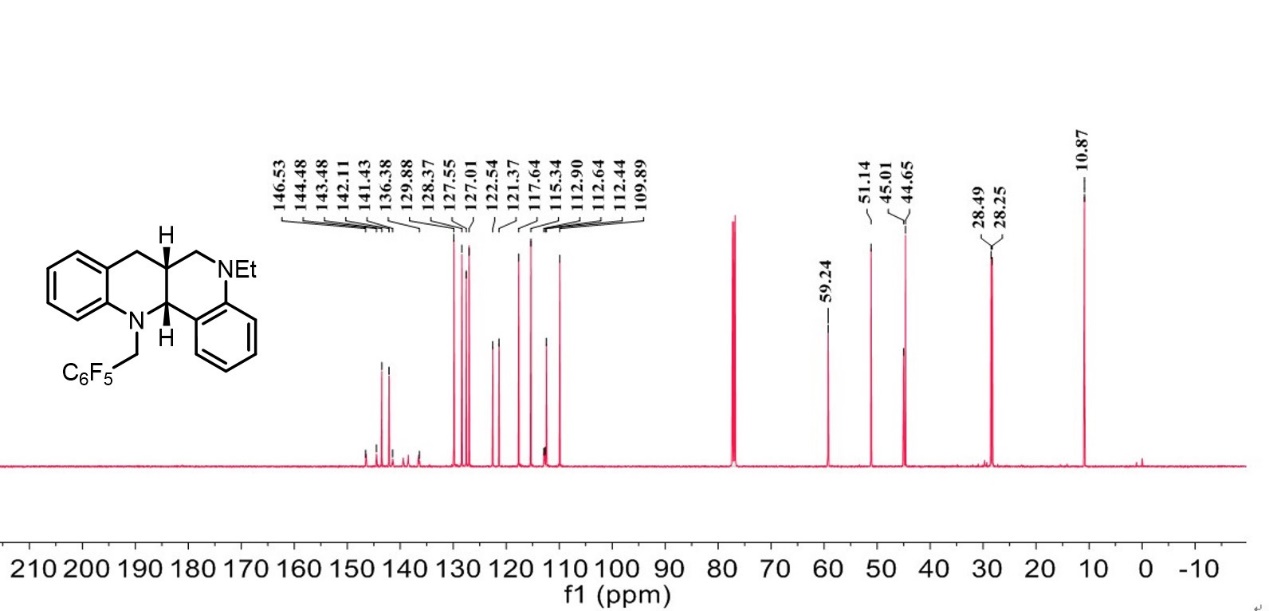
**

**19F-NMR spectrum of C15**

**
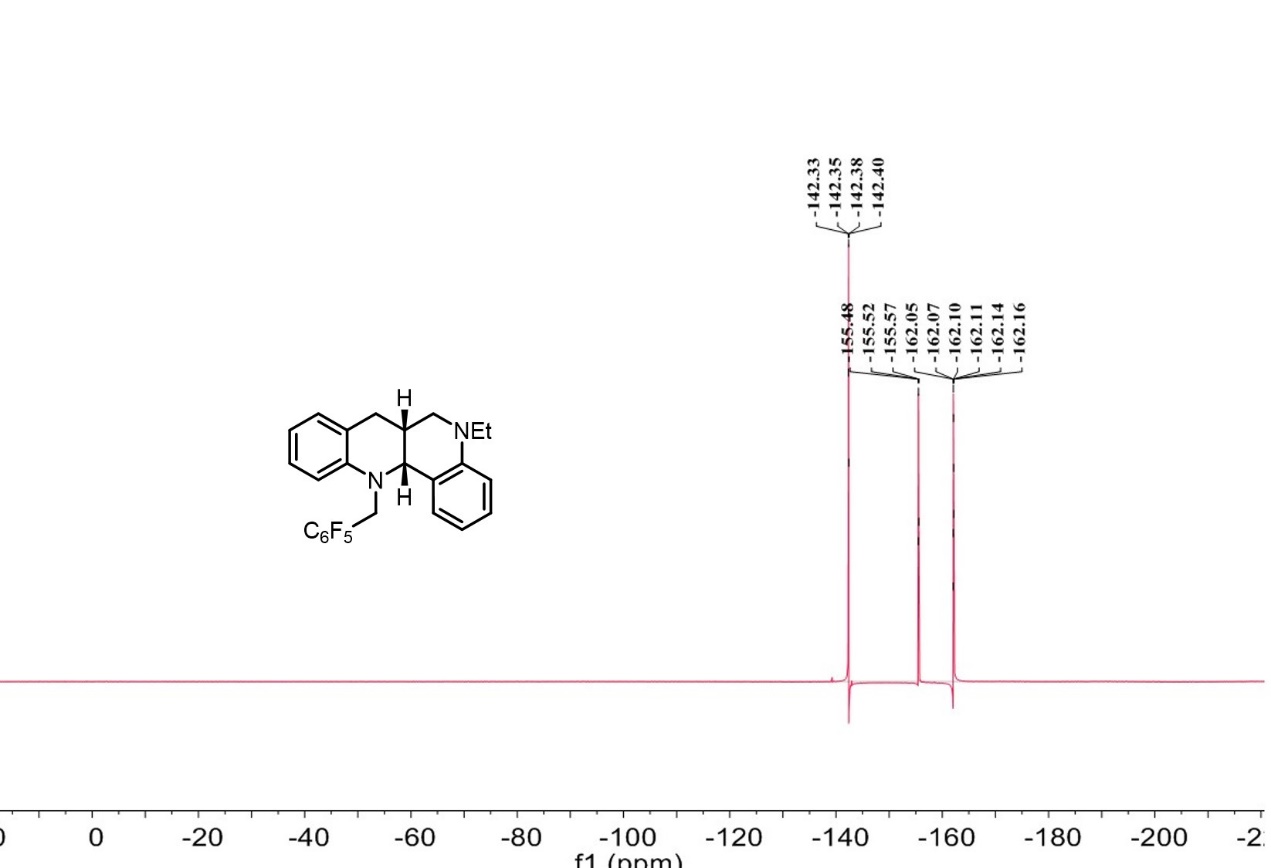
**

**1H-NMR spectrum of C16**

**
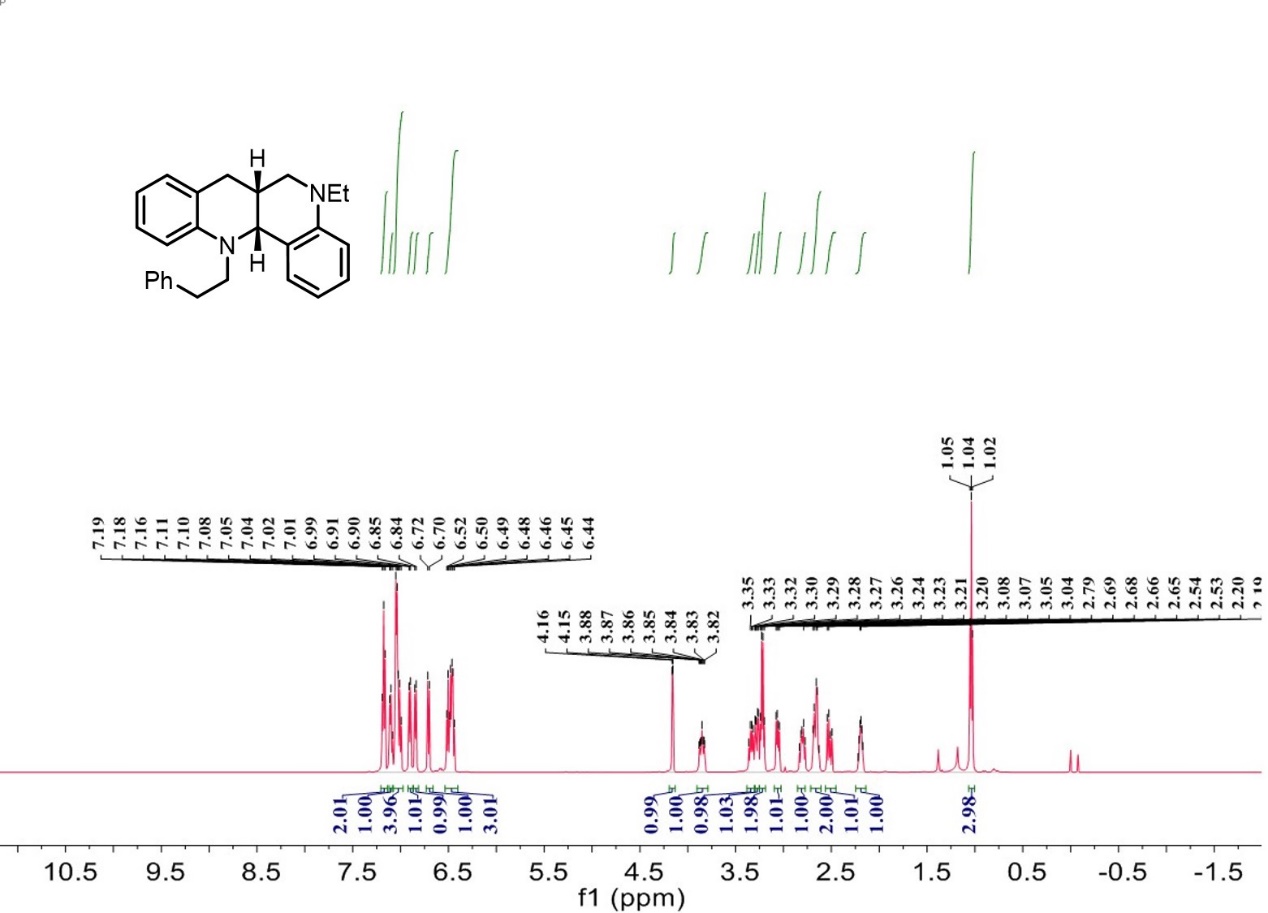
**

**13C-NMR spectrum of C16**

**
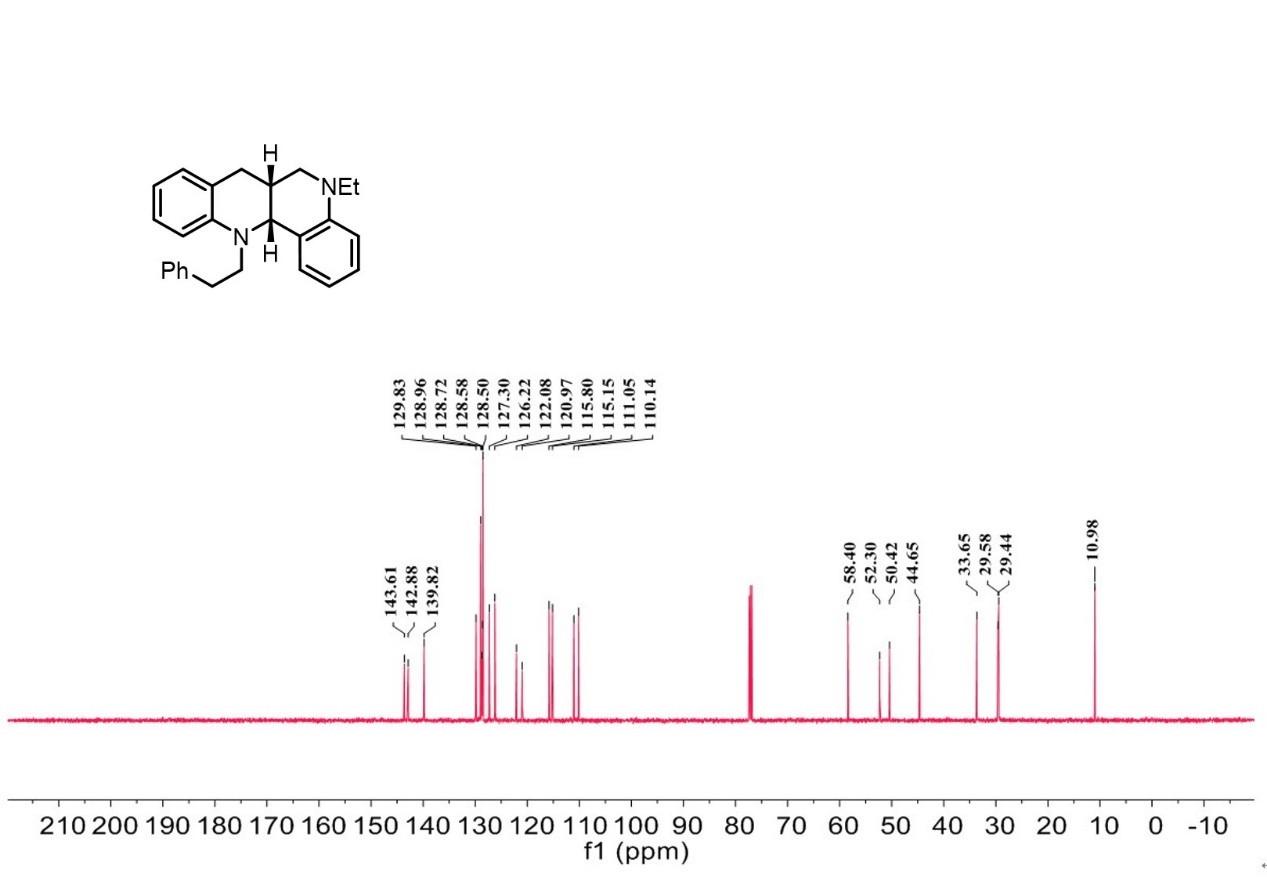
**

**1H-NMR spectrum of C17**

**
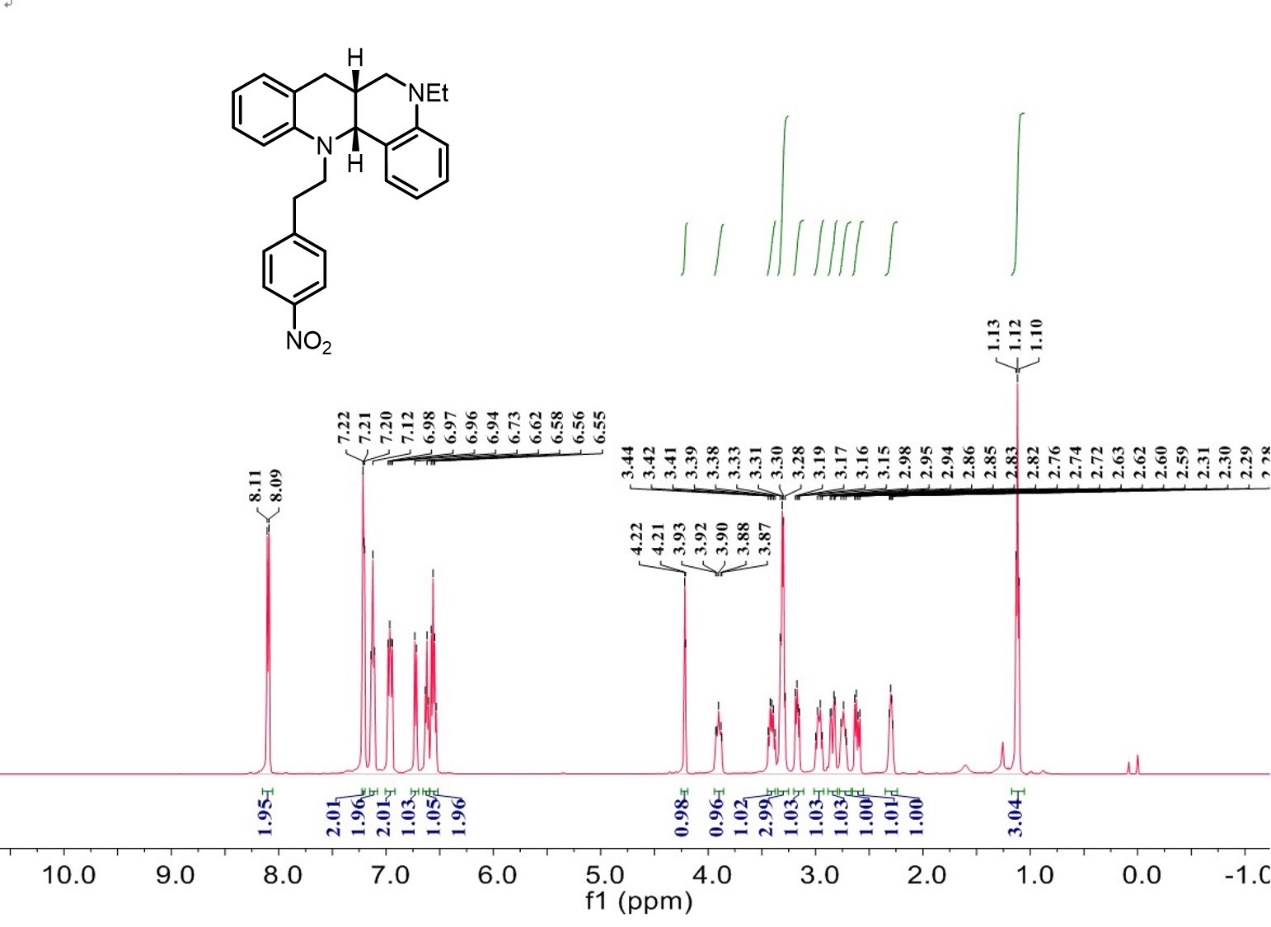
**

**13C-NMR spectrum of C17**

**
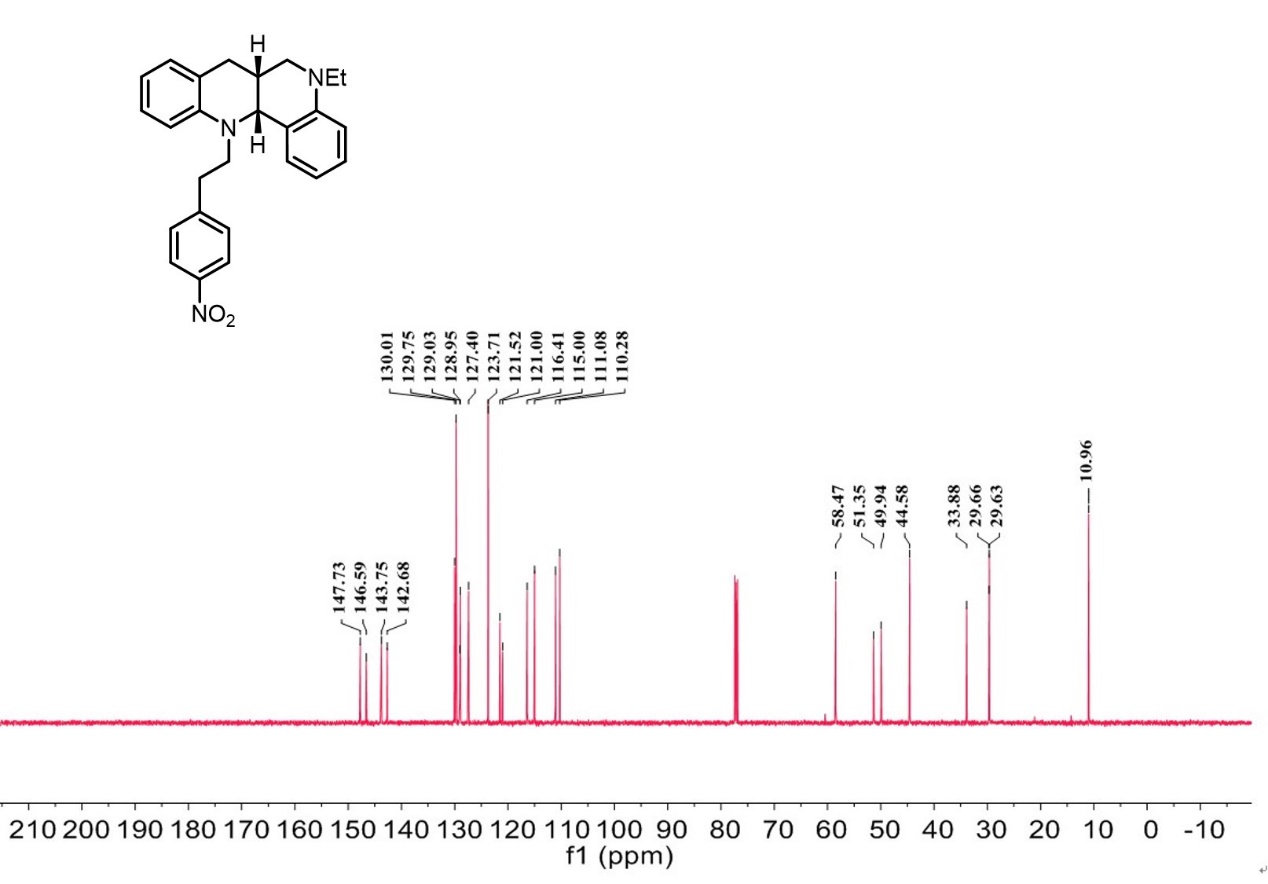
**

**1H-NMR spectrum of C18**

**
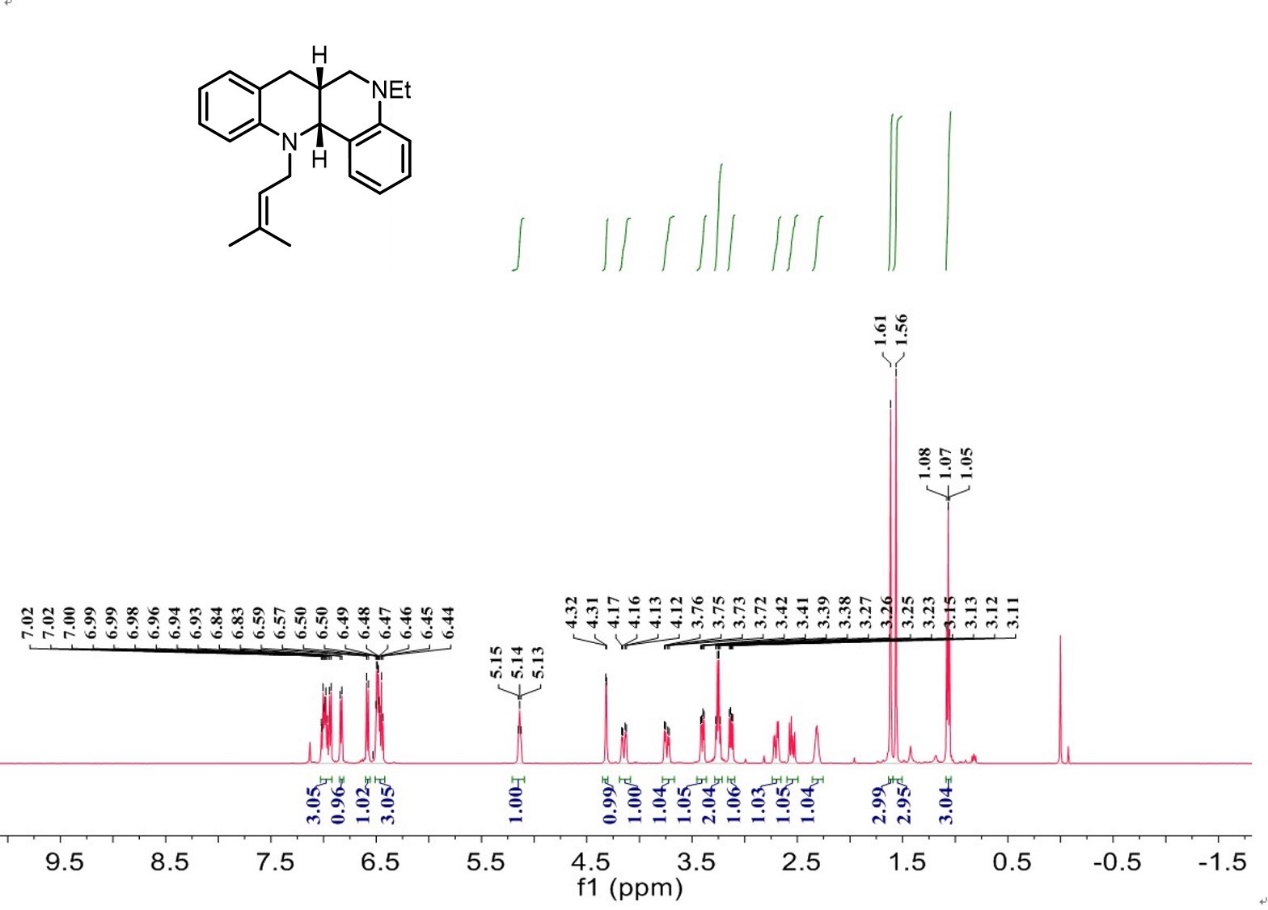
**

**13C-NMR spectrum of C18**

**
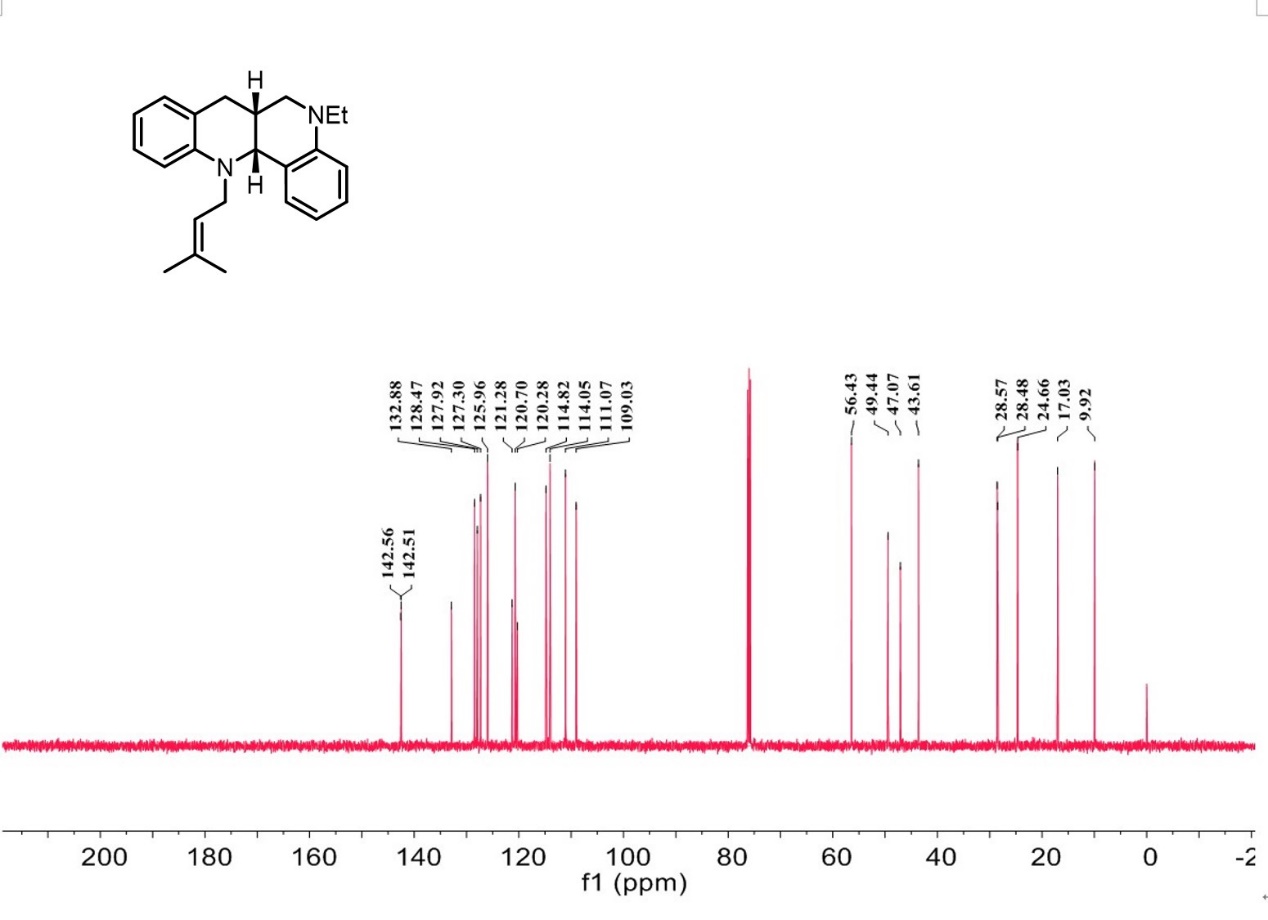
**

**1H-NMR spectrum of C19**

**
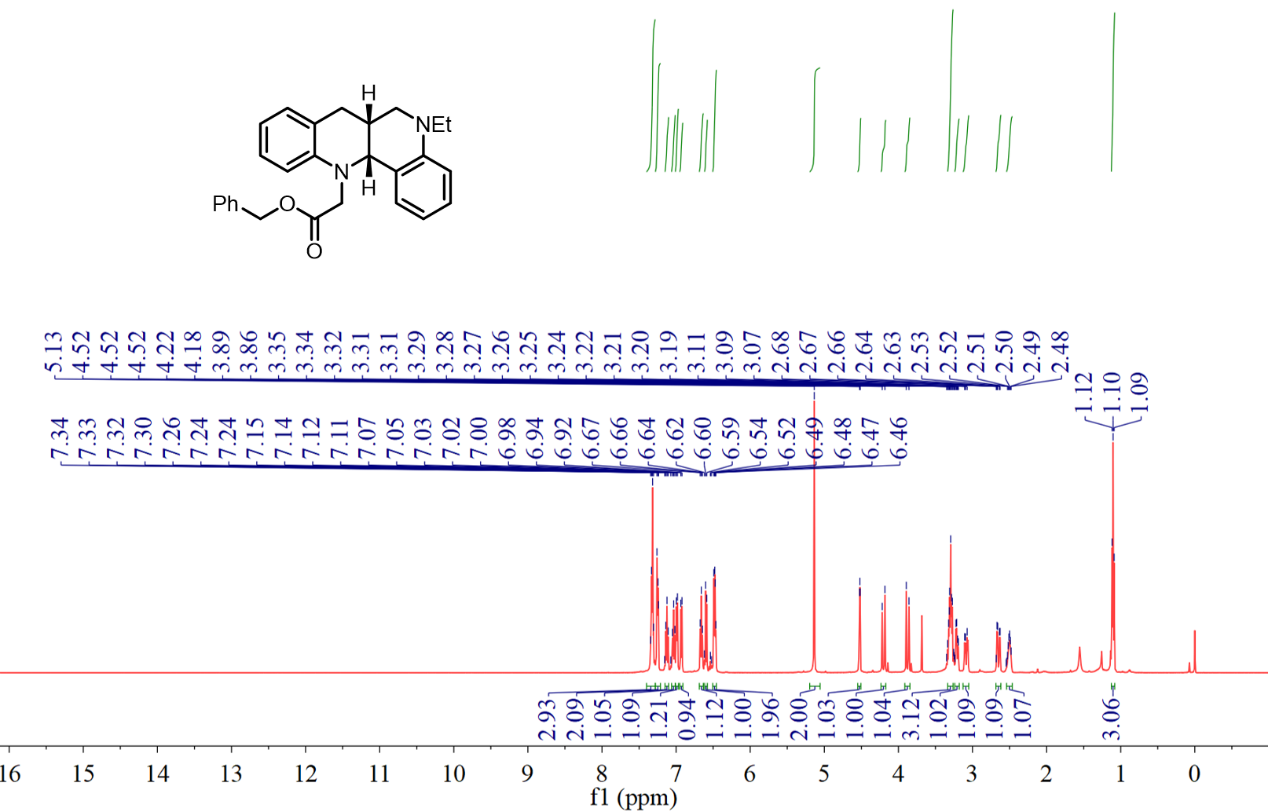
**

**13C-NMR spectrum of C19**

**
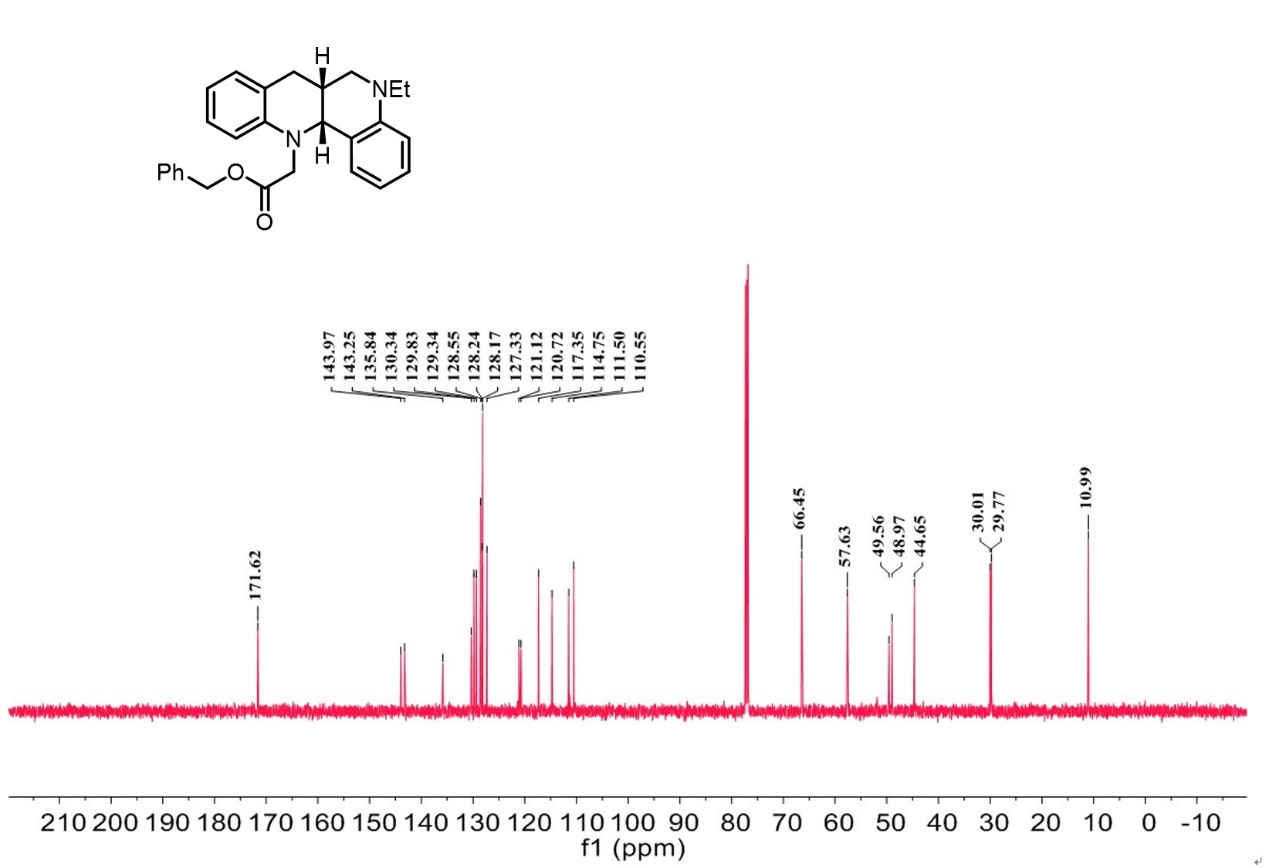
**

**1H-NMR spectrum of C20**

**
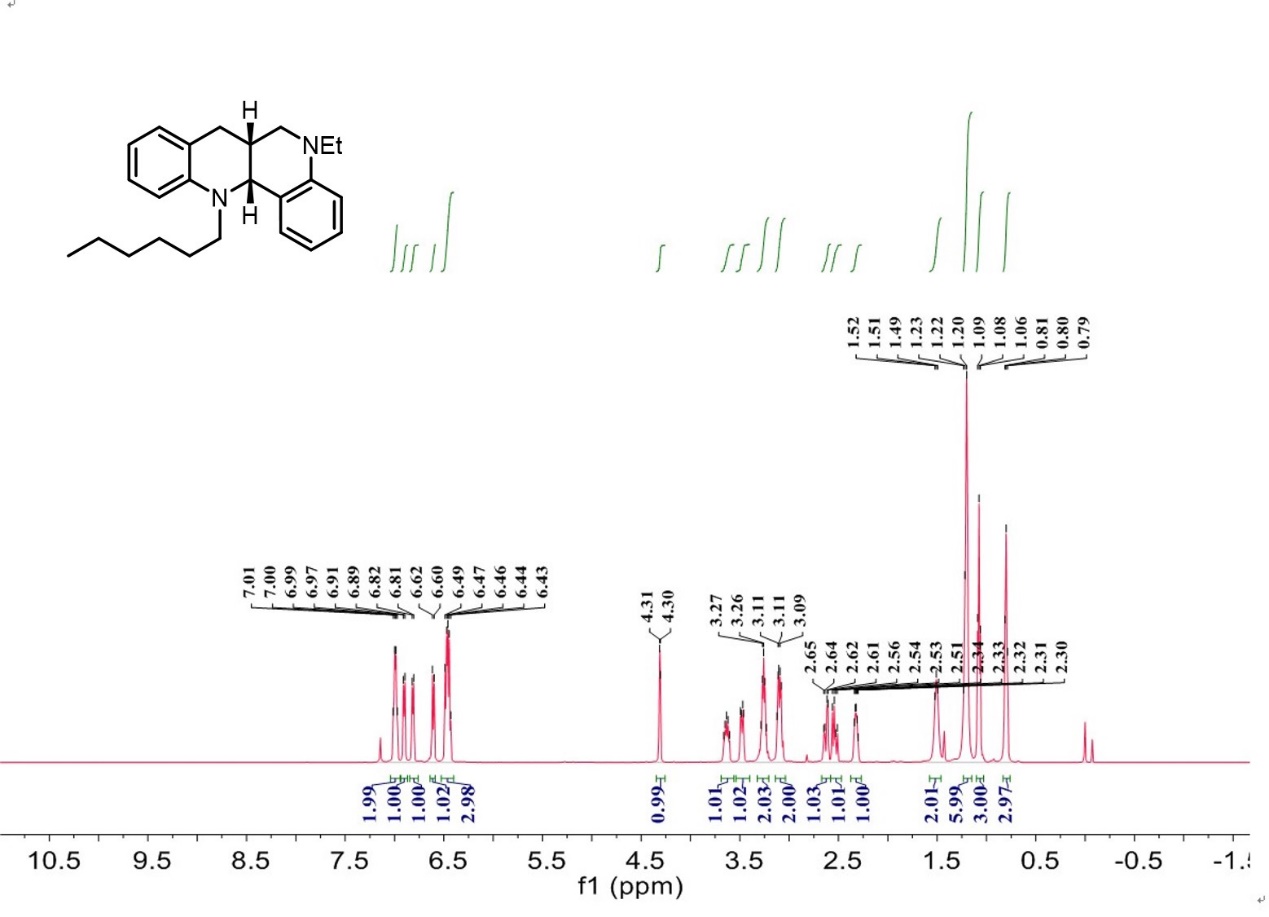
**

**13C-NMR spectrum of C20**


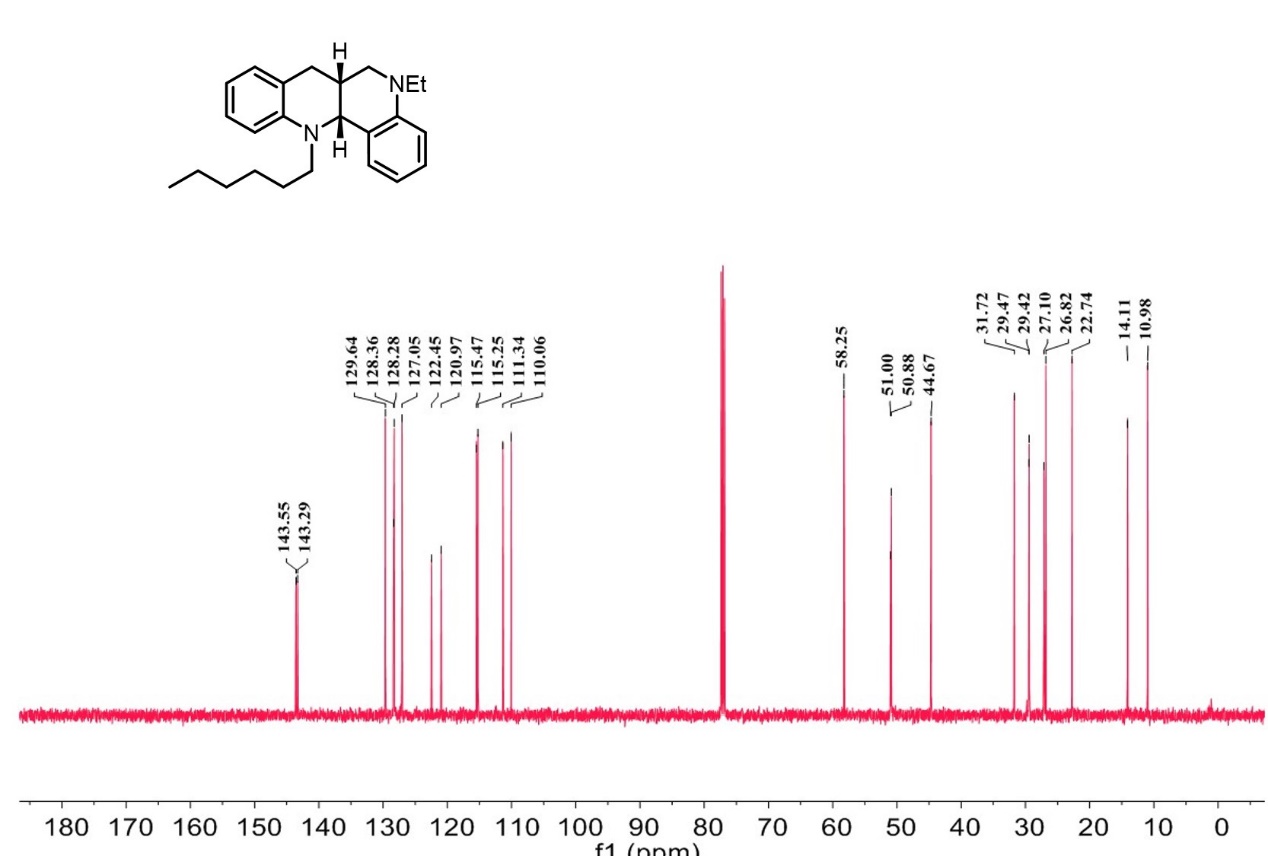


**1H-NMR spectrum of C21**

**
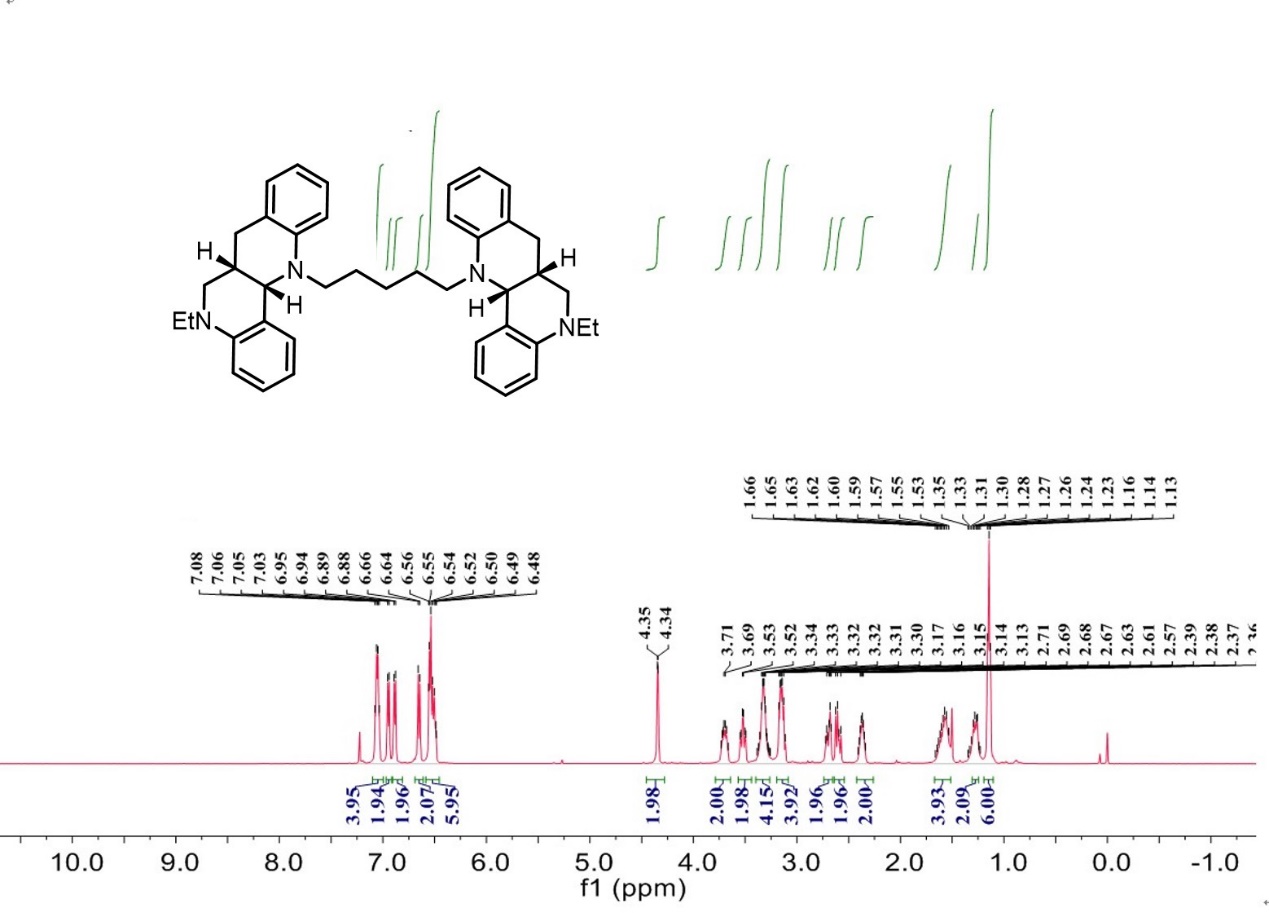
**

**13C-NMR spectrum of C21**


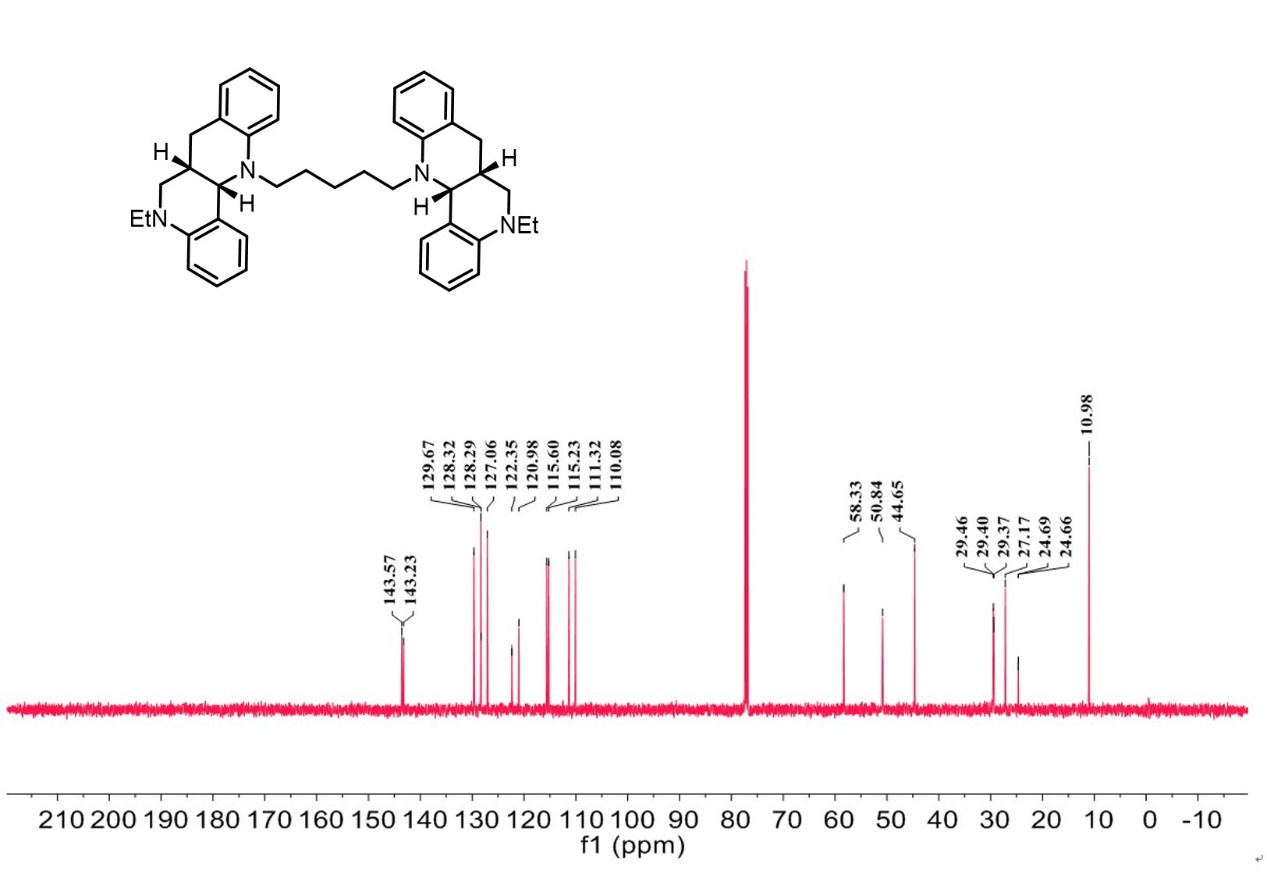


**1H-NMR spectrum of C22**

**
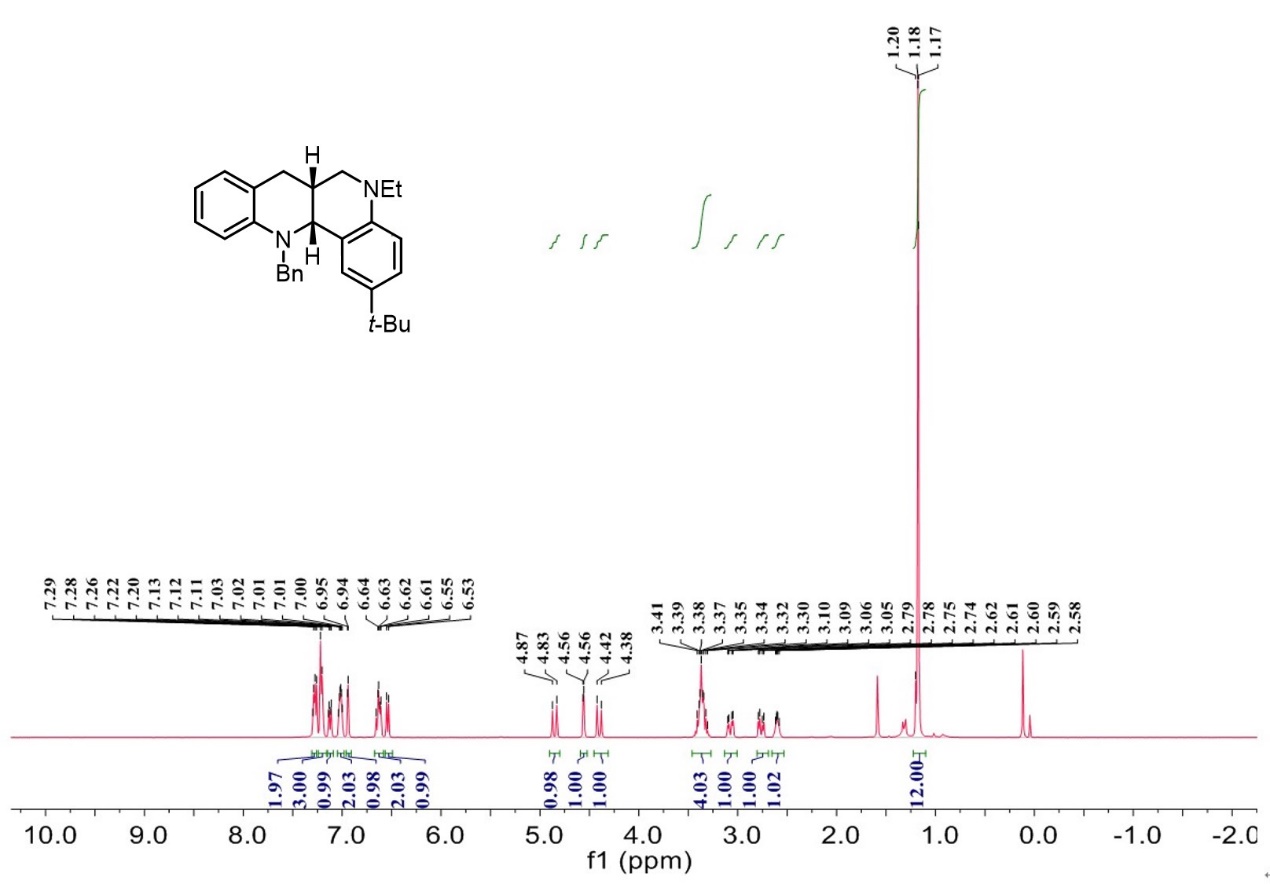
**

**13C-NMR spectrum of C22**

**
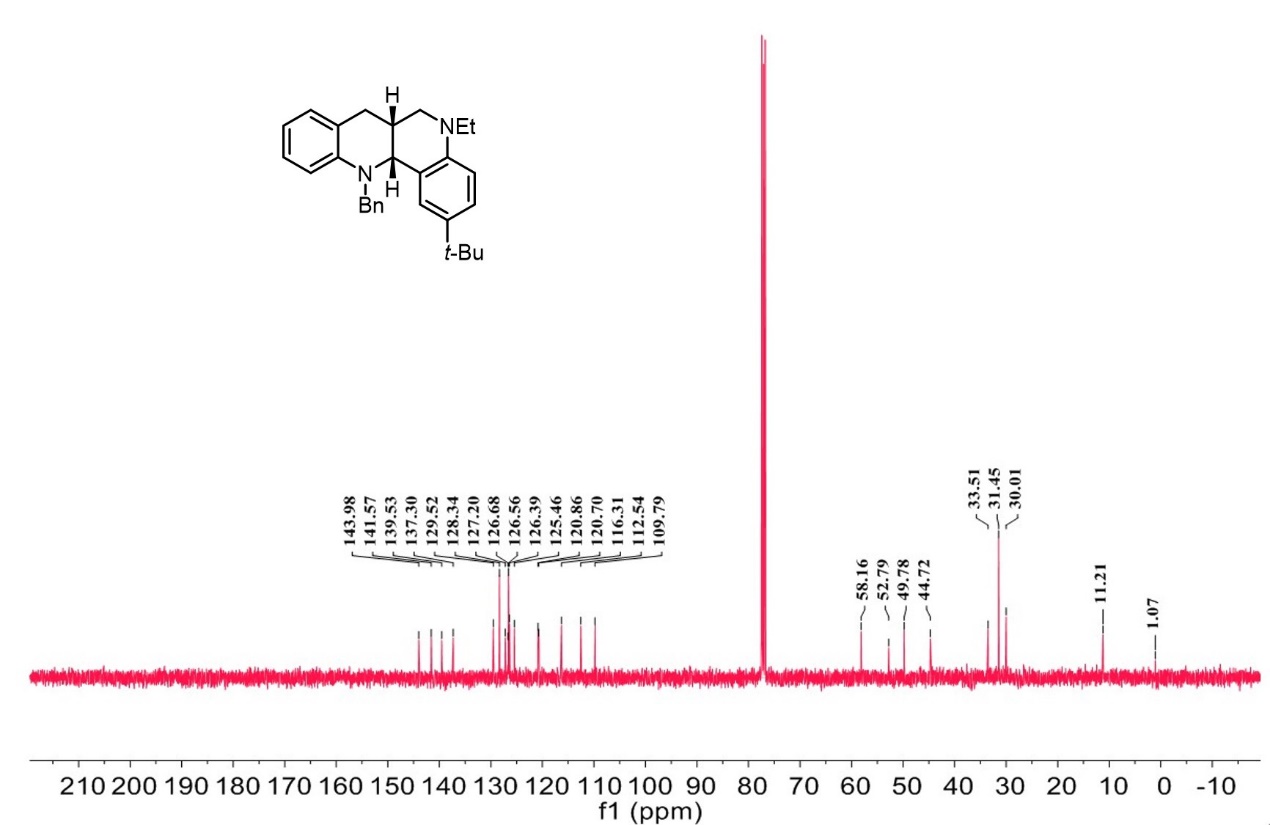
**

**1H-NMR spectrum of C23**

**
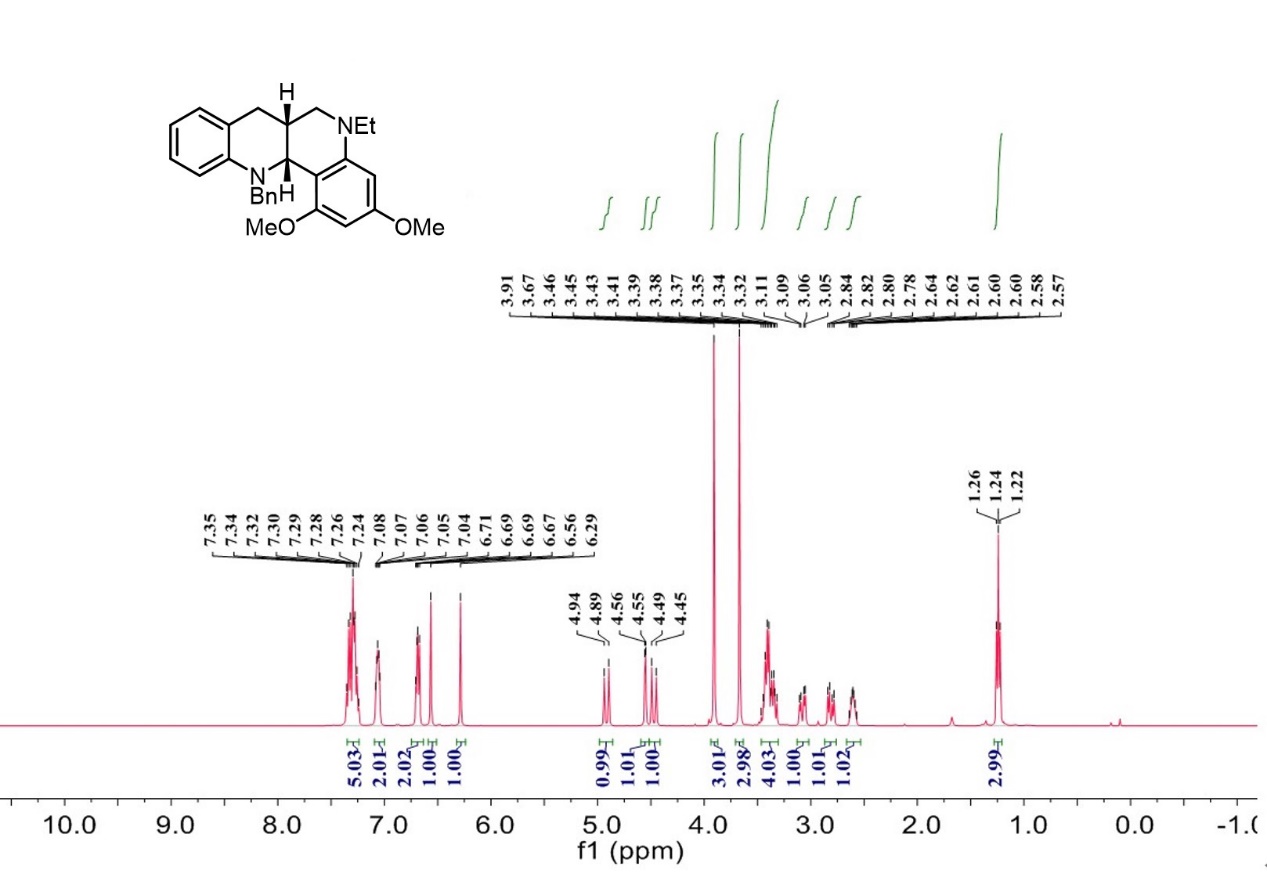
**

**13C-NMR spectrum of C23**

**
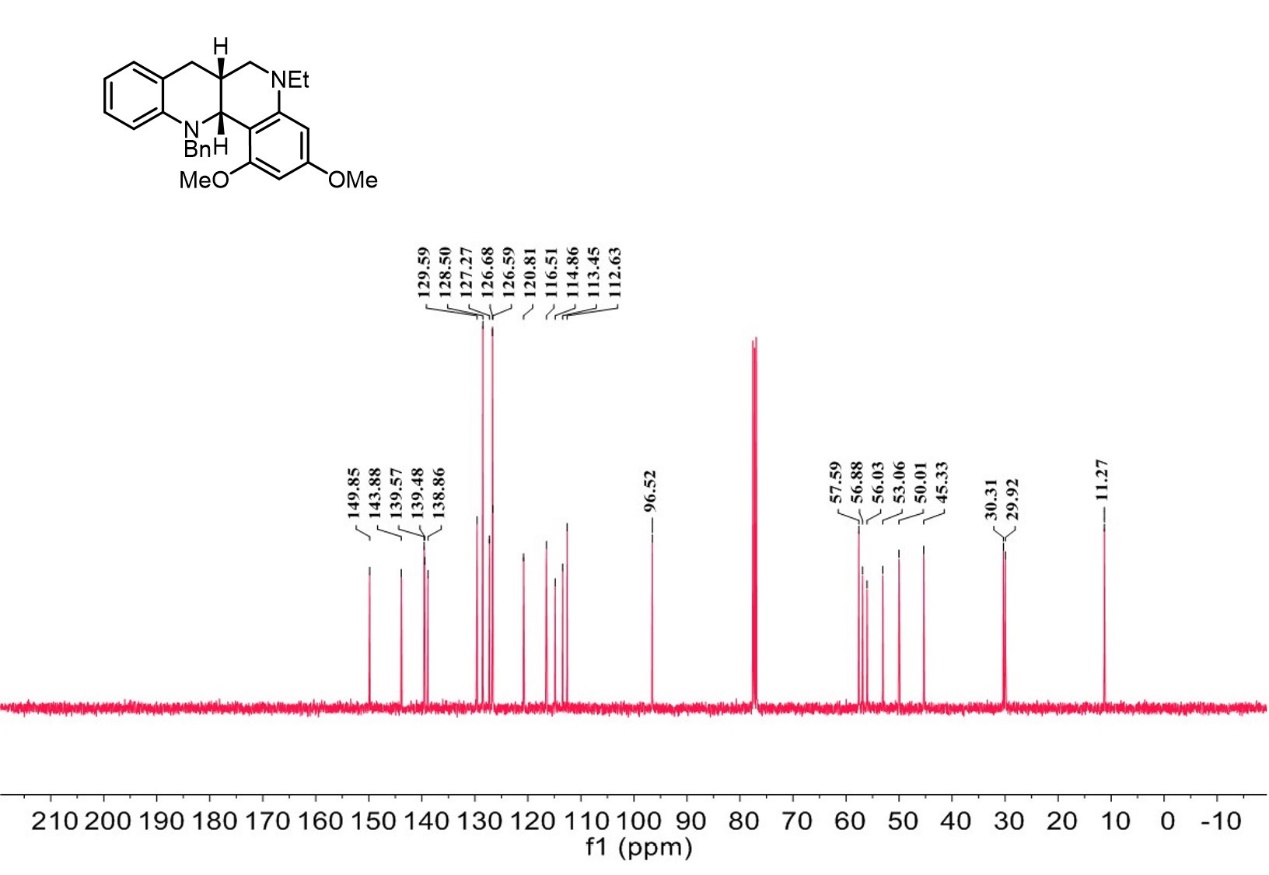
**

**1H-NMR spectrum of C24**

**
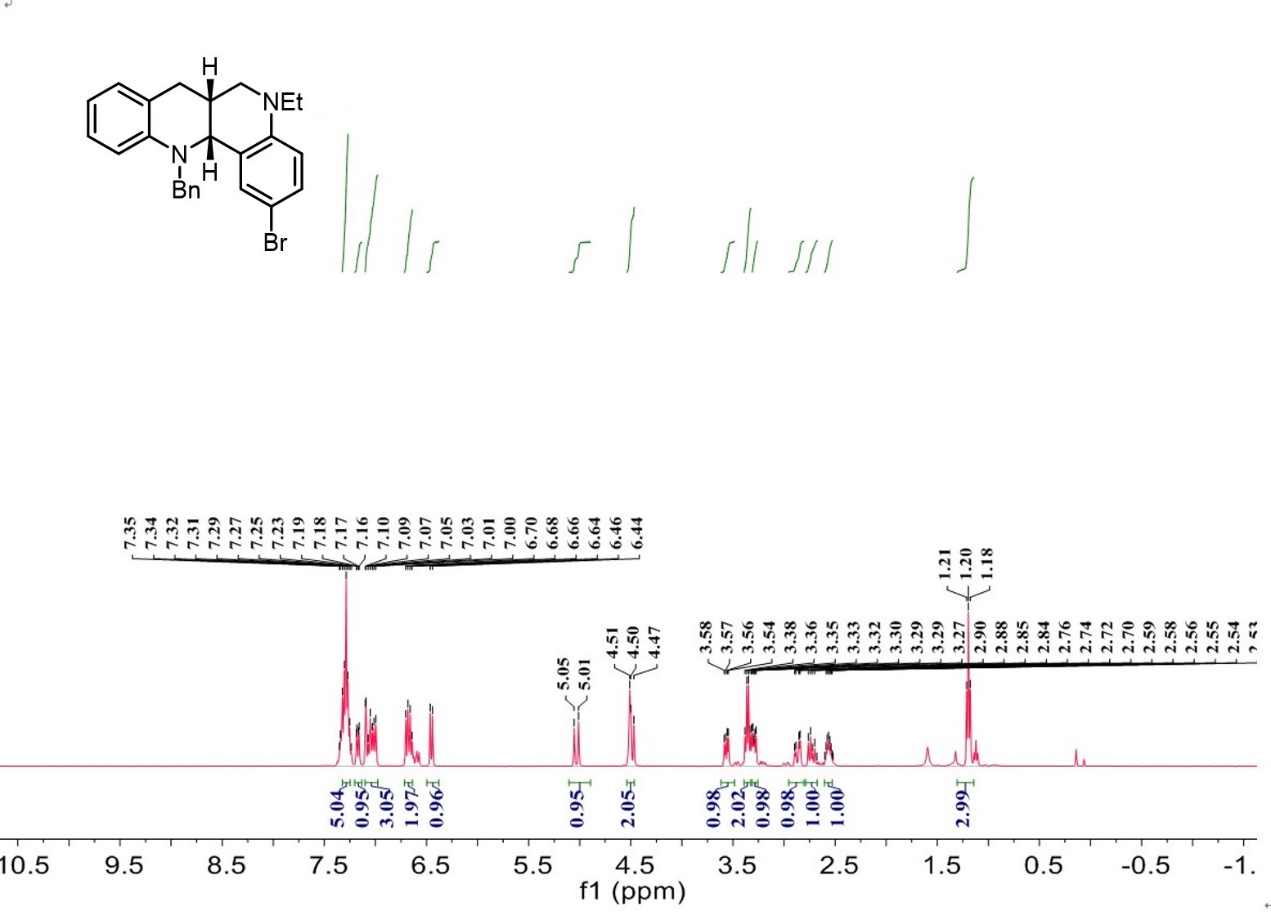
**

**13C-NMR spectrum of C24**


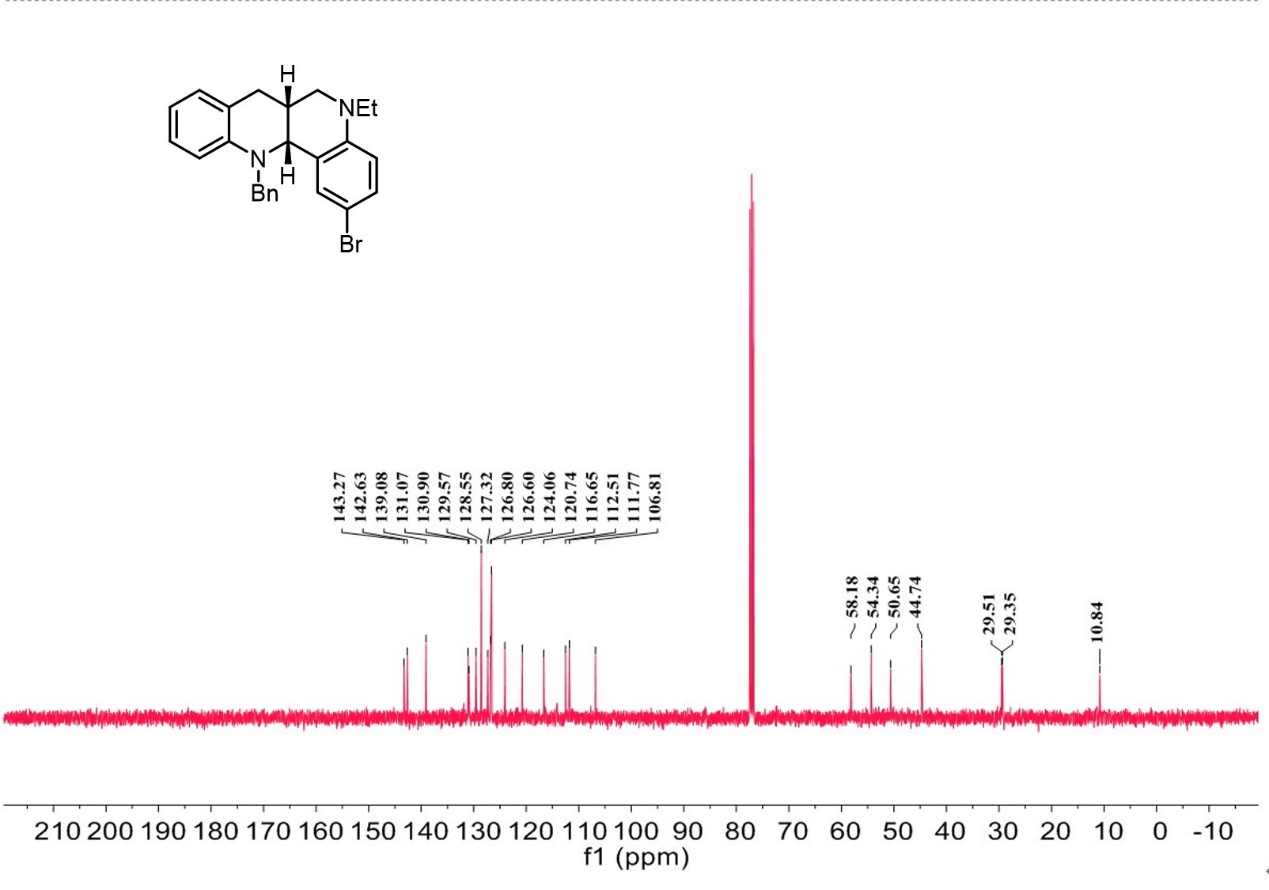


**1H-NMR spectrum of C25**

**
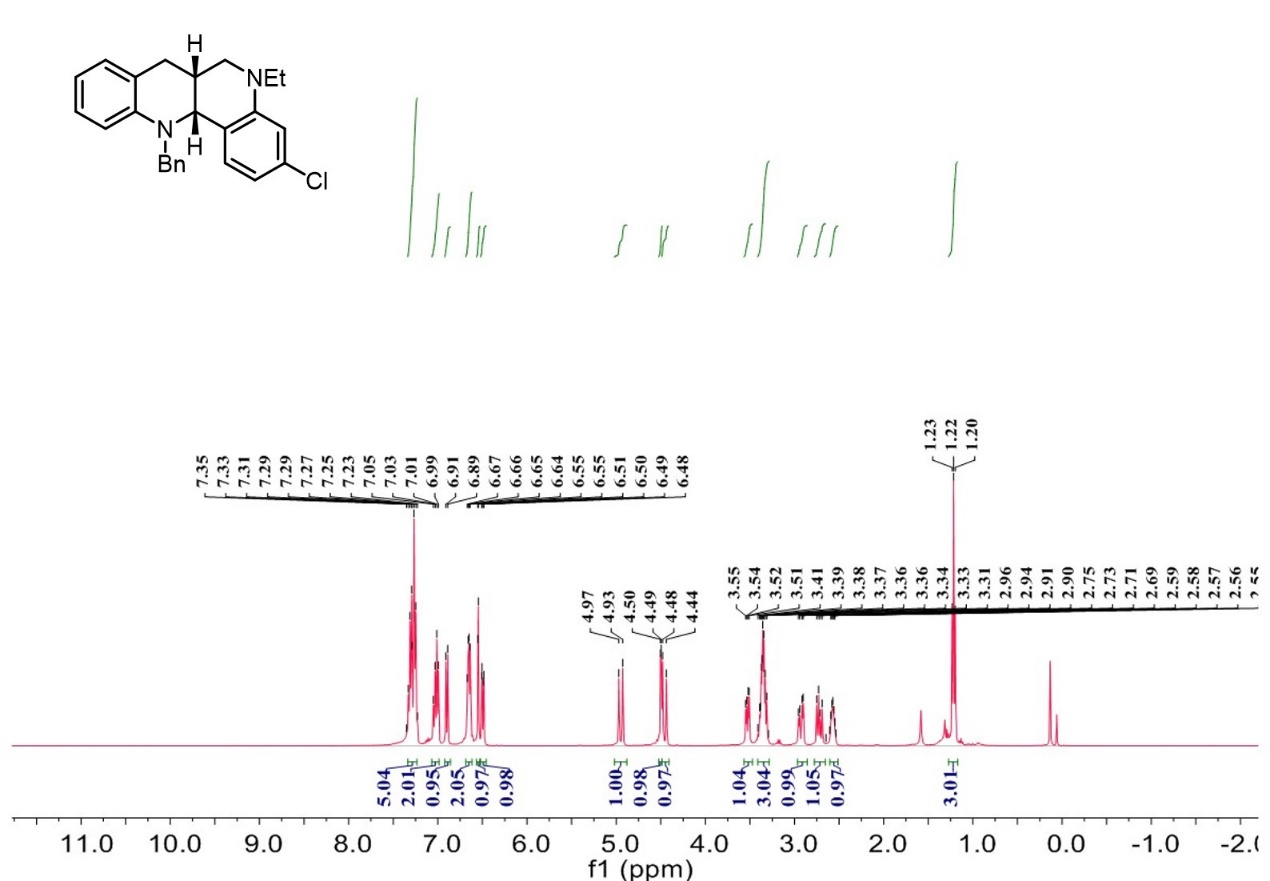
**

**13C-NMR spectrum of C25**


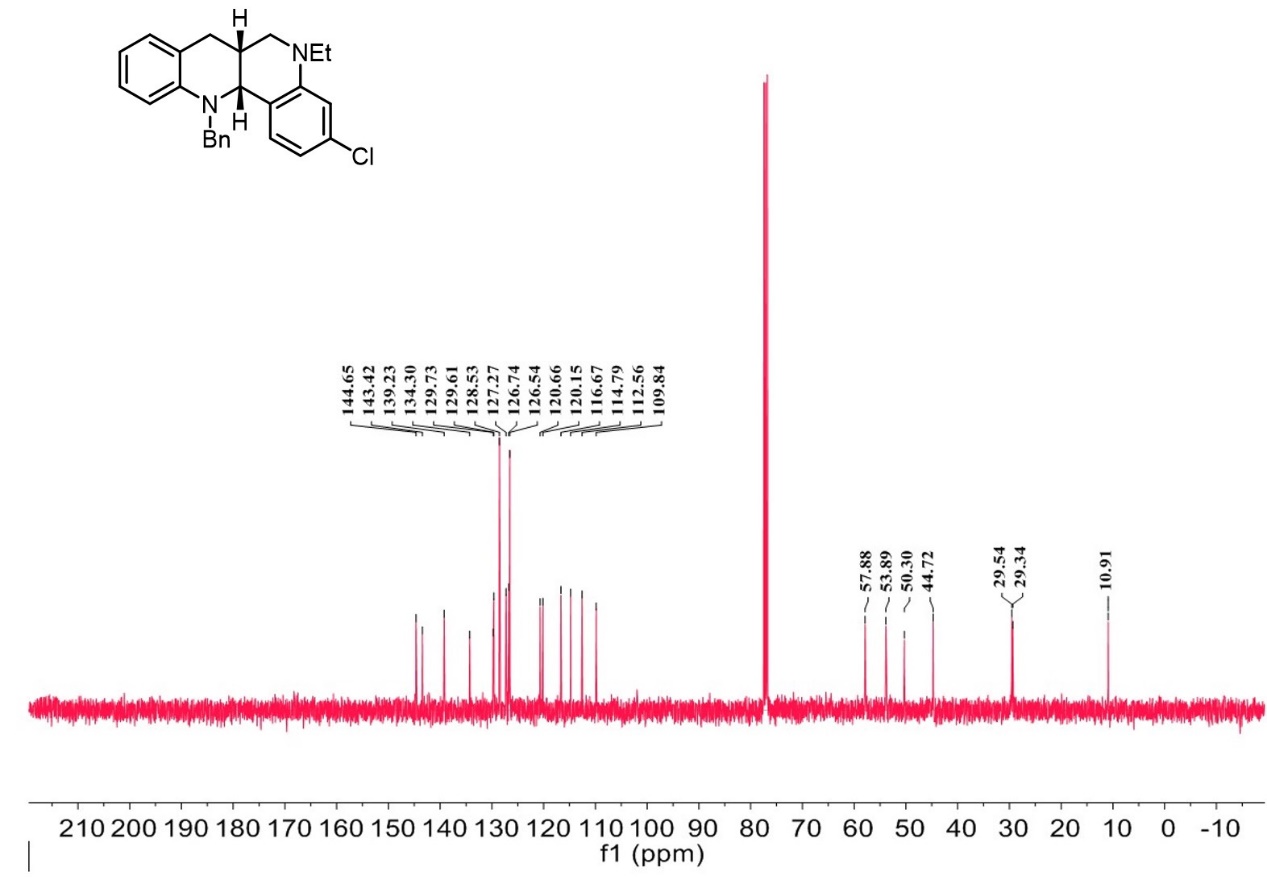


**1H-NMR spectrum of C26**

**
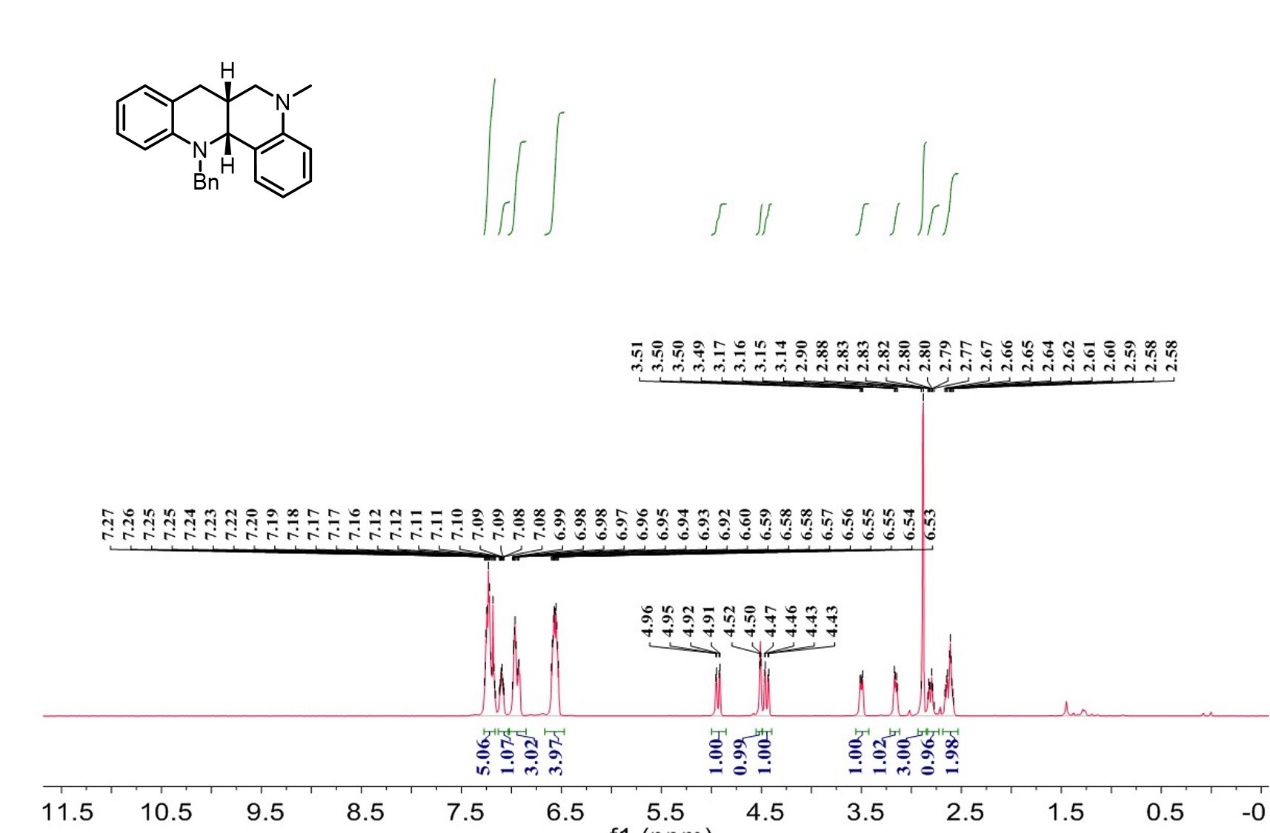
**

**13C-NMR spectrum of C26**


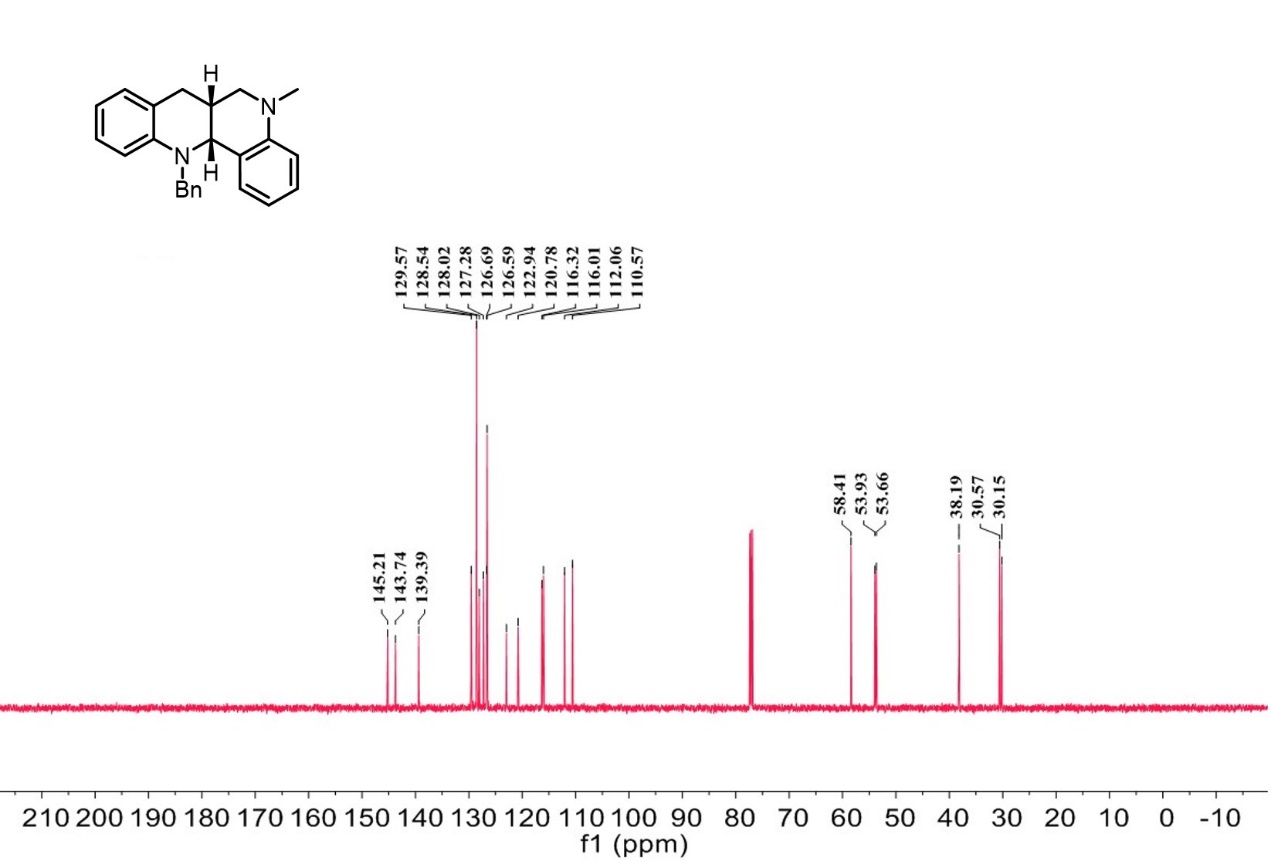


**1H-NMR spectrum of C27**


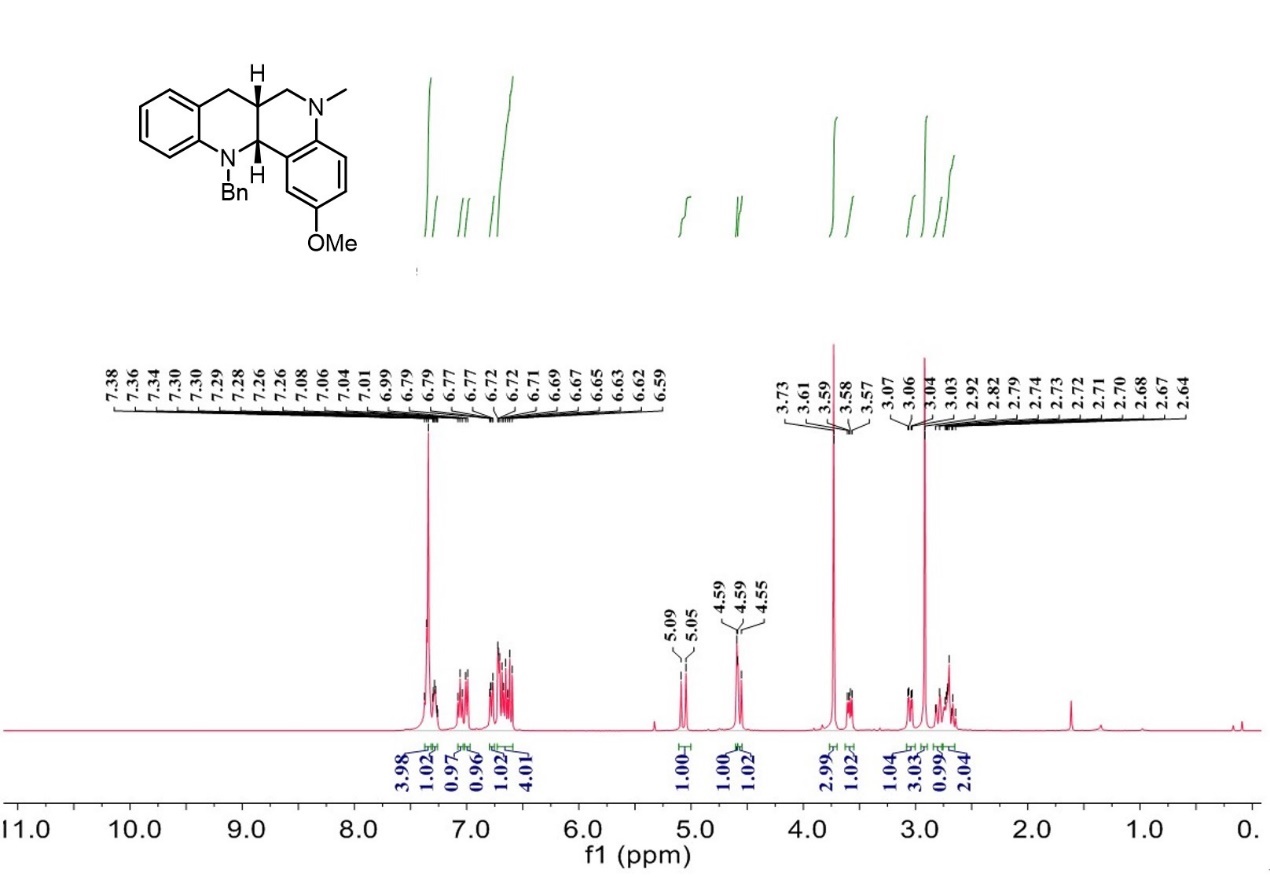


**13C-NMR spectrum of C27**


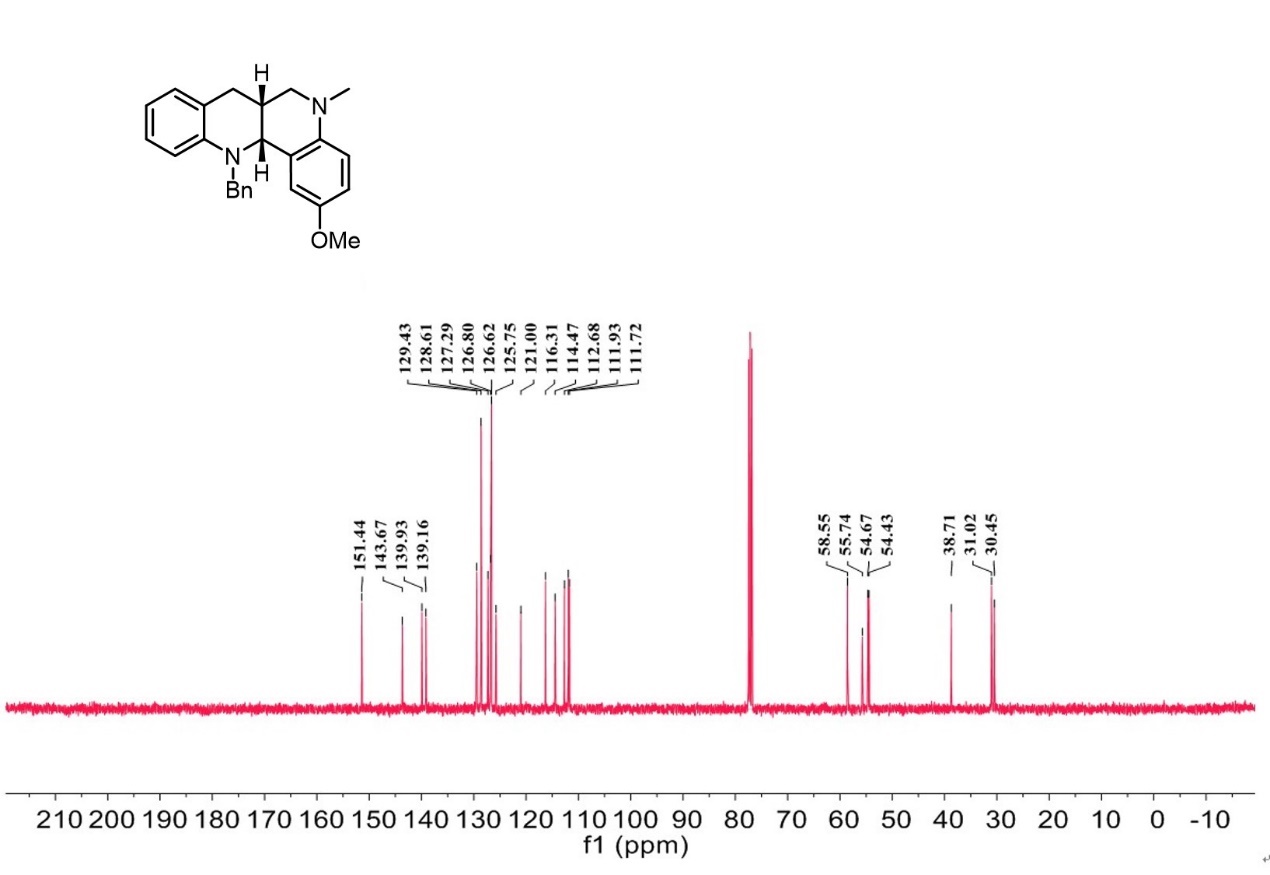


**1H-NMR spectrum of C28**


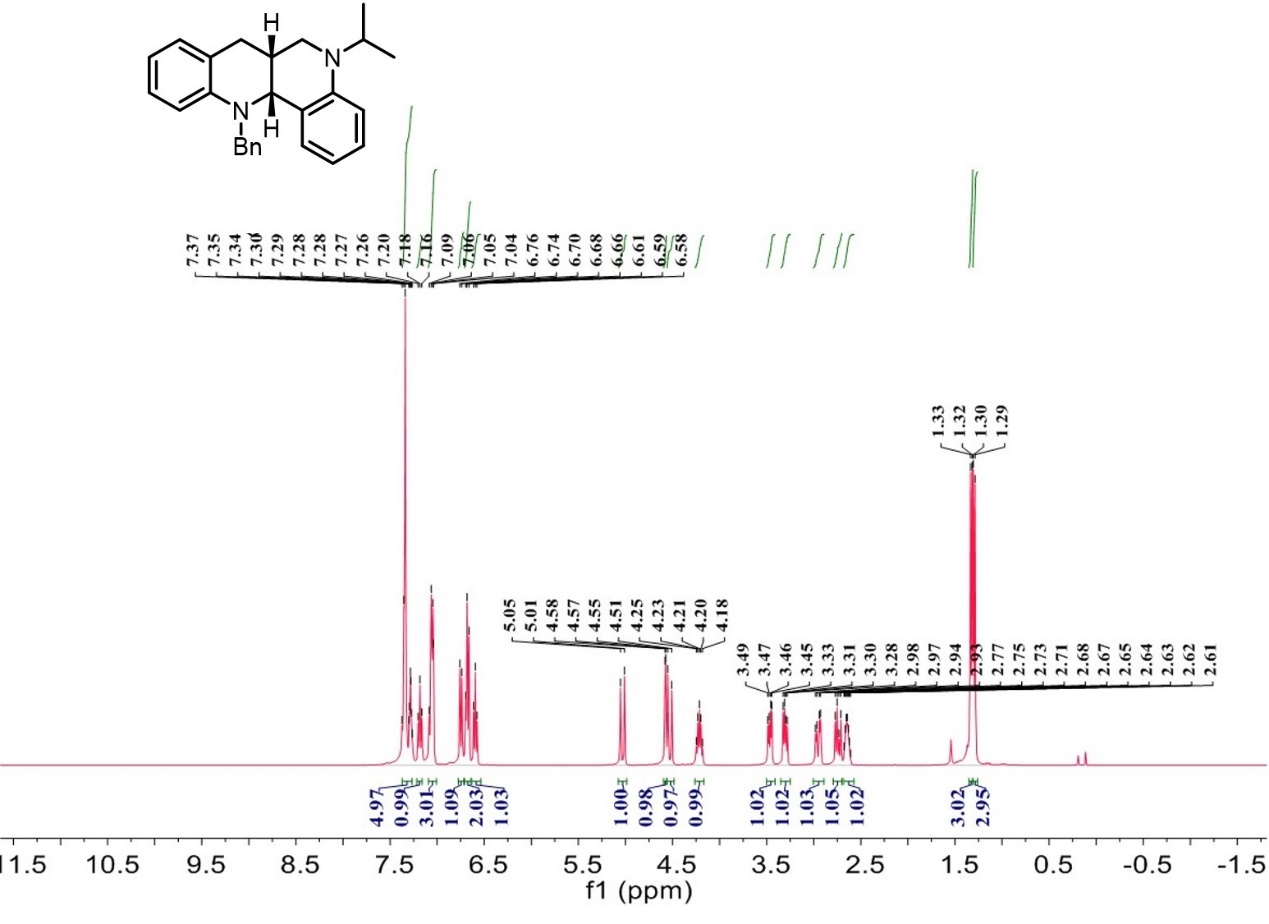


**13C-NMR spectrum of C28**

**
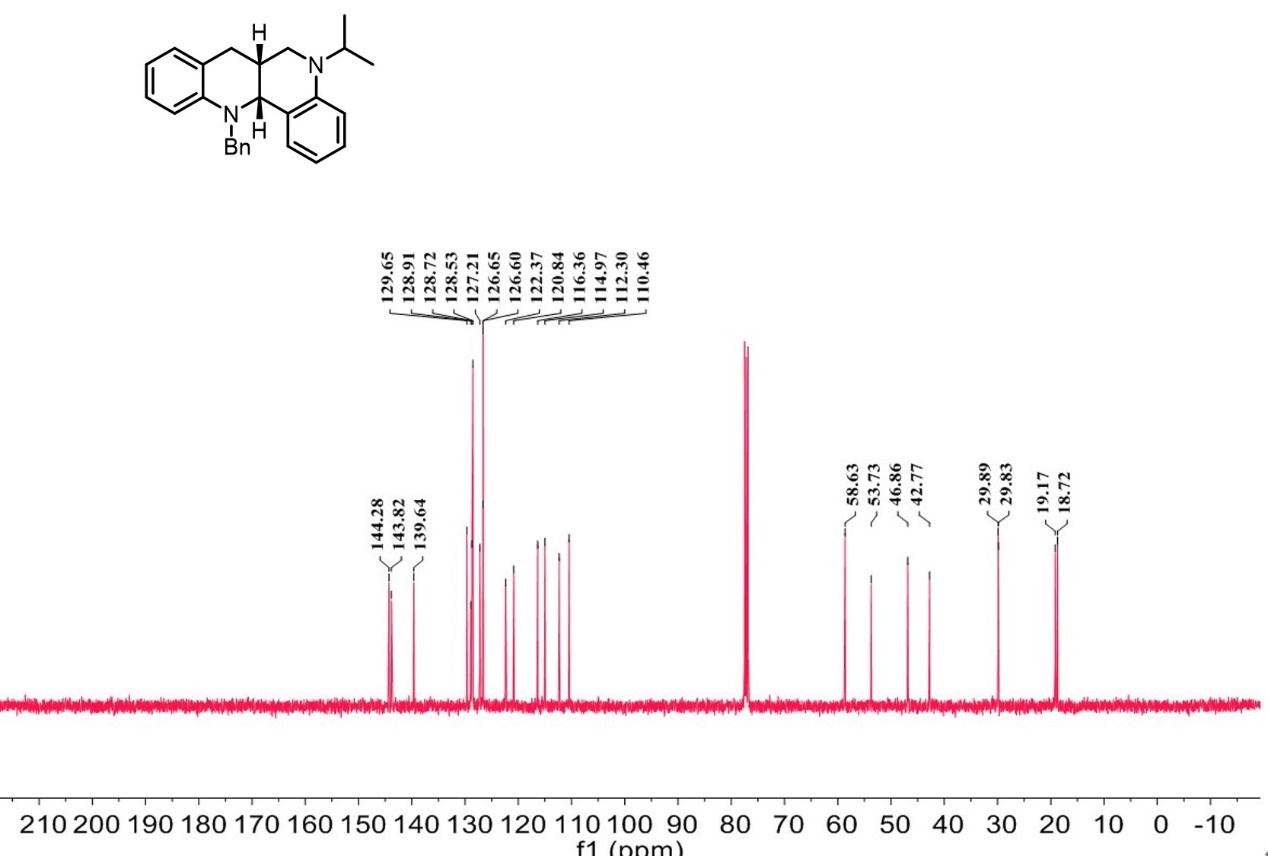
**

**1H-NMR spectrum of C29**


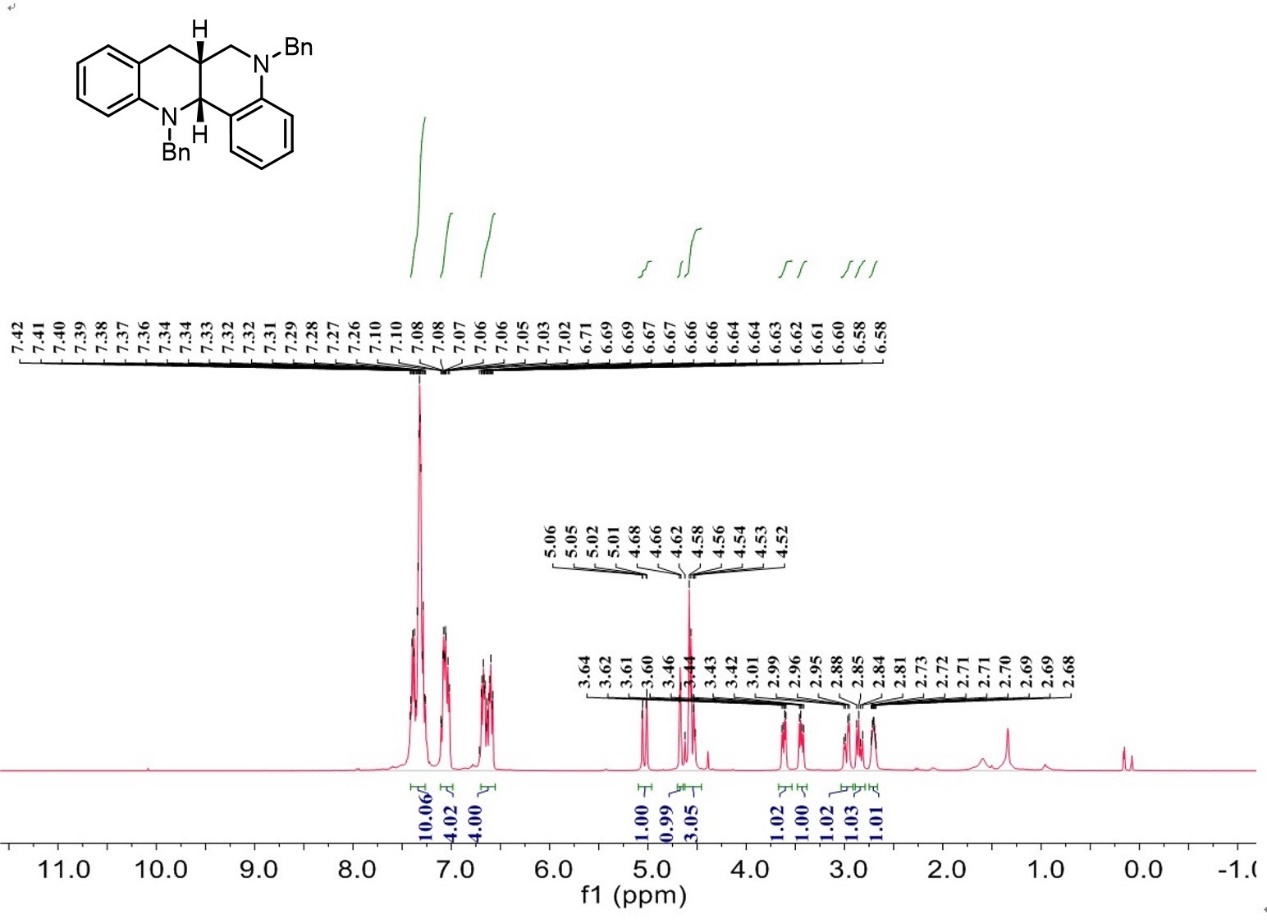


**13C-NMR spectrum of C29**


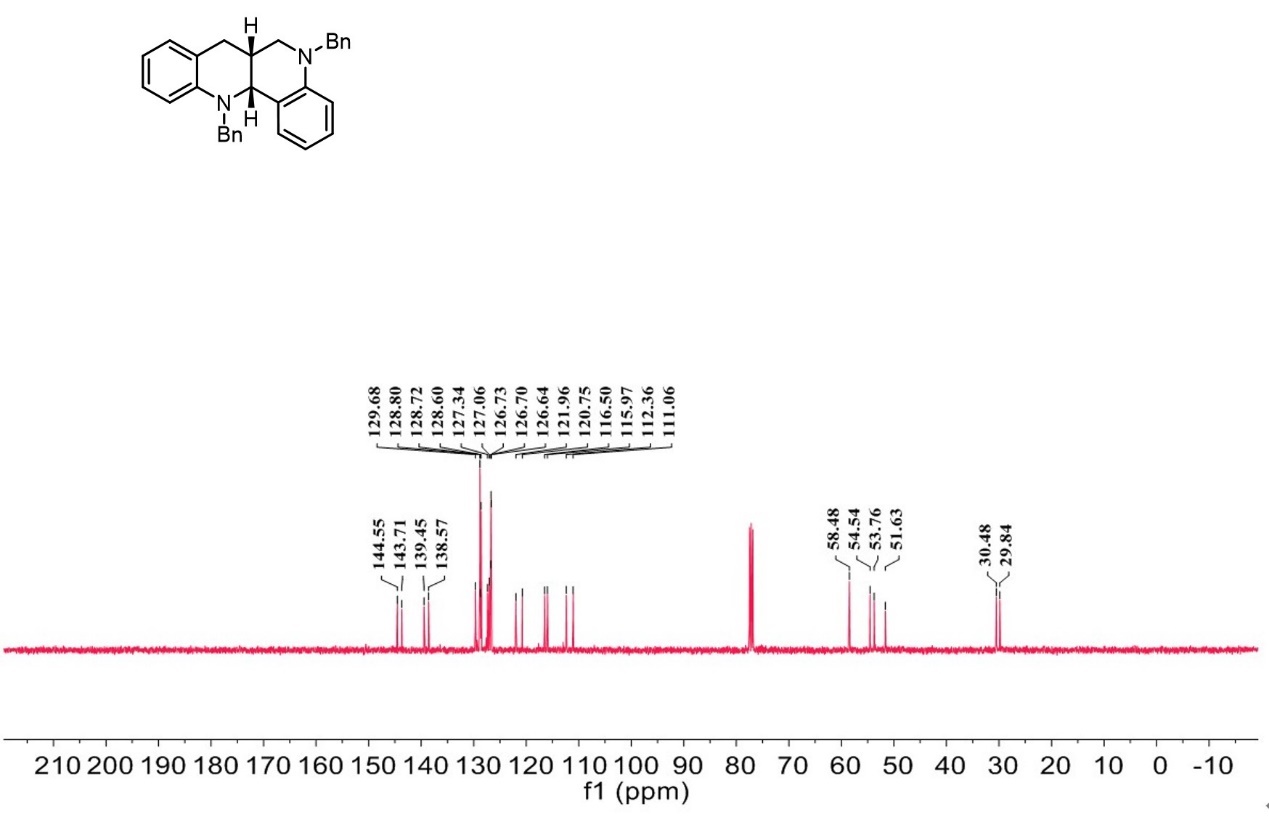


**1H-NMR spectrum of C30**

**
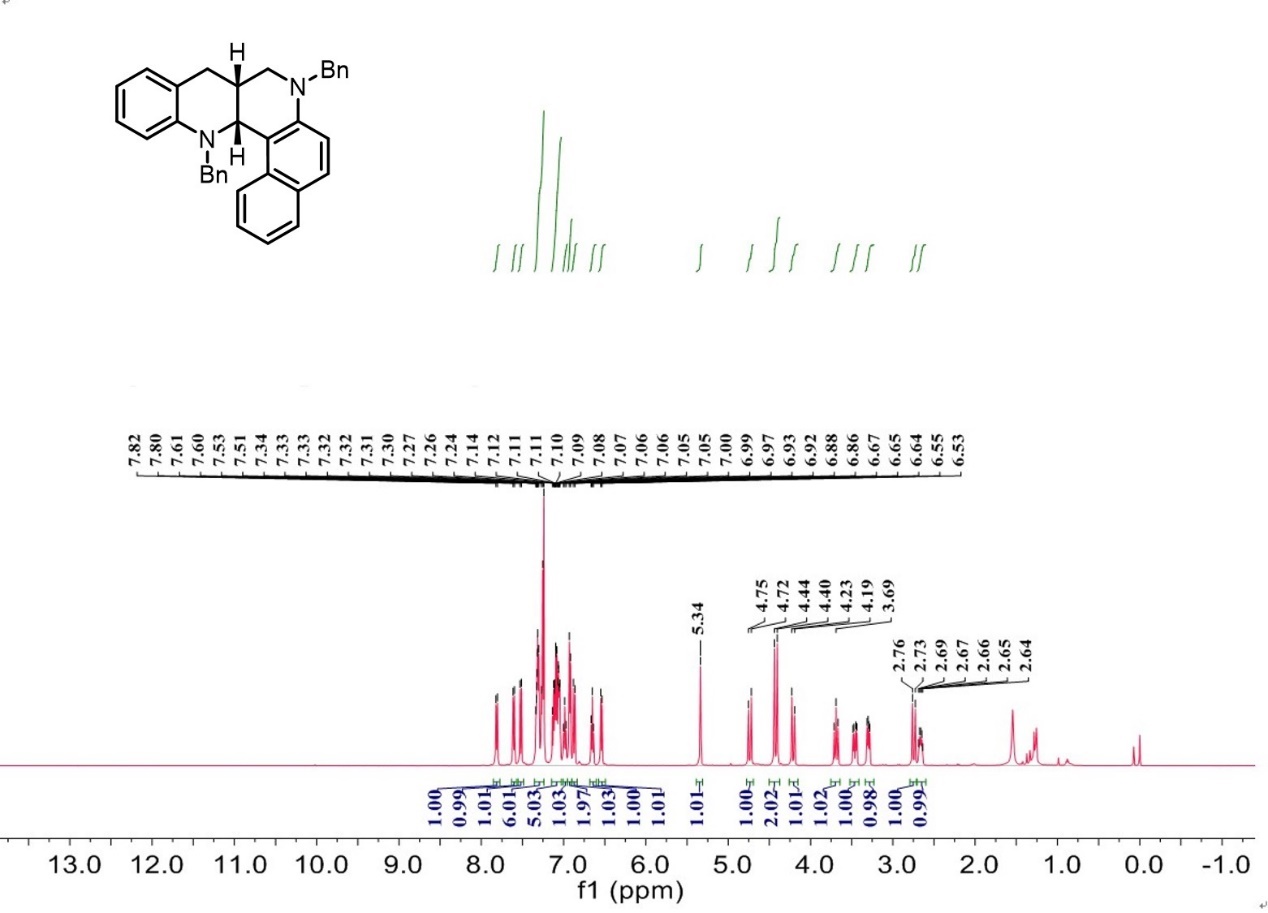
**

**13C-NMR spectrum of C30**

**
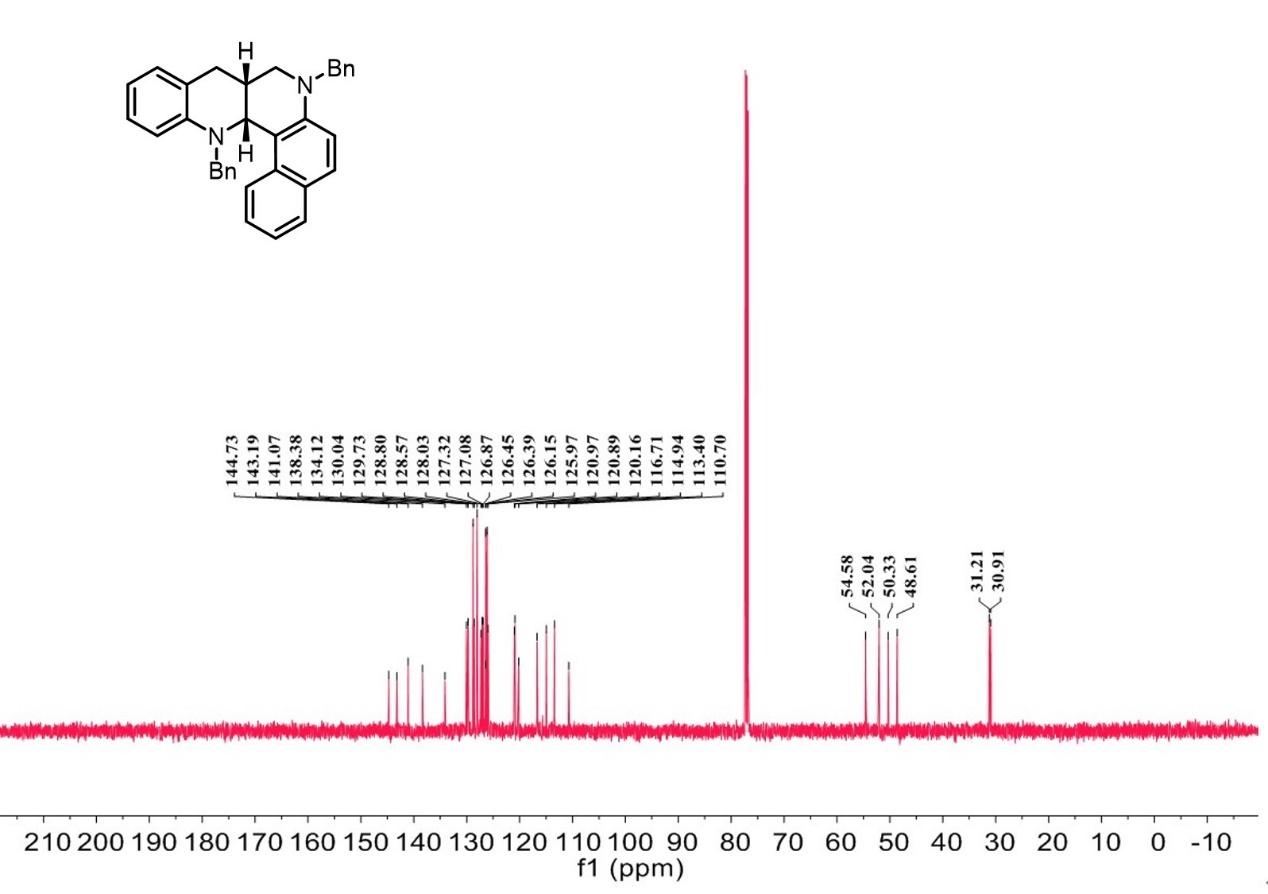
**

**1H-NMR spectrum of C31**

**
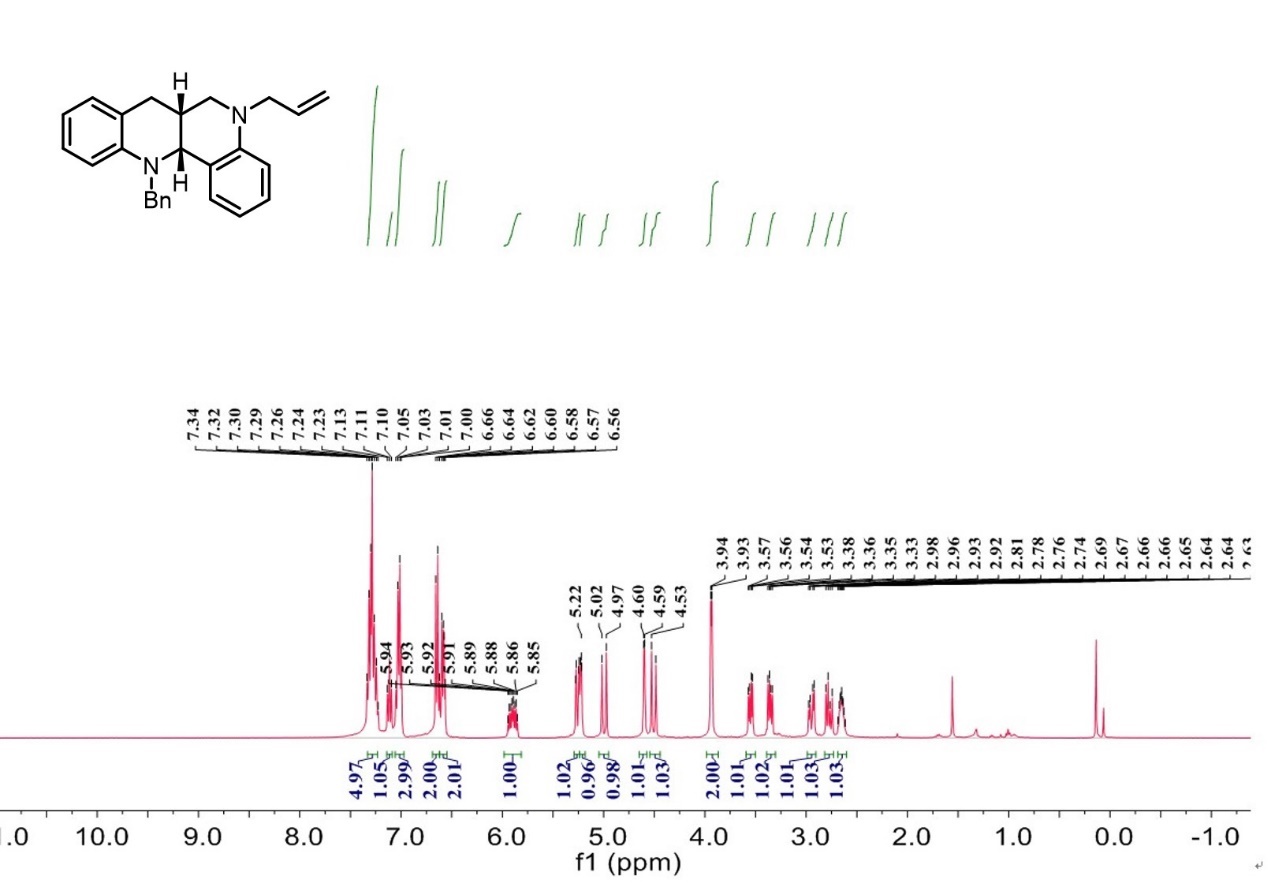
**

**13C-NMR spectrum of C31**

**
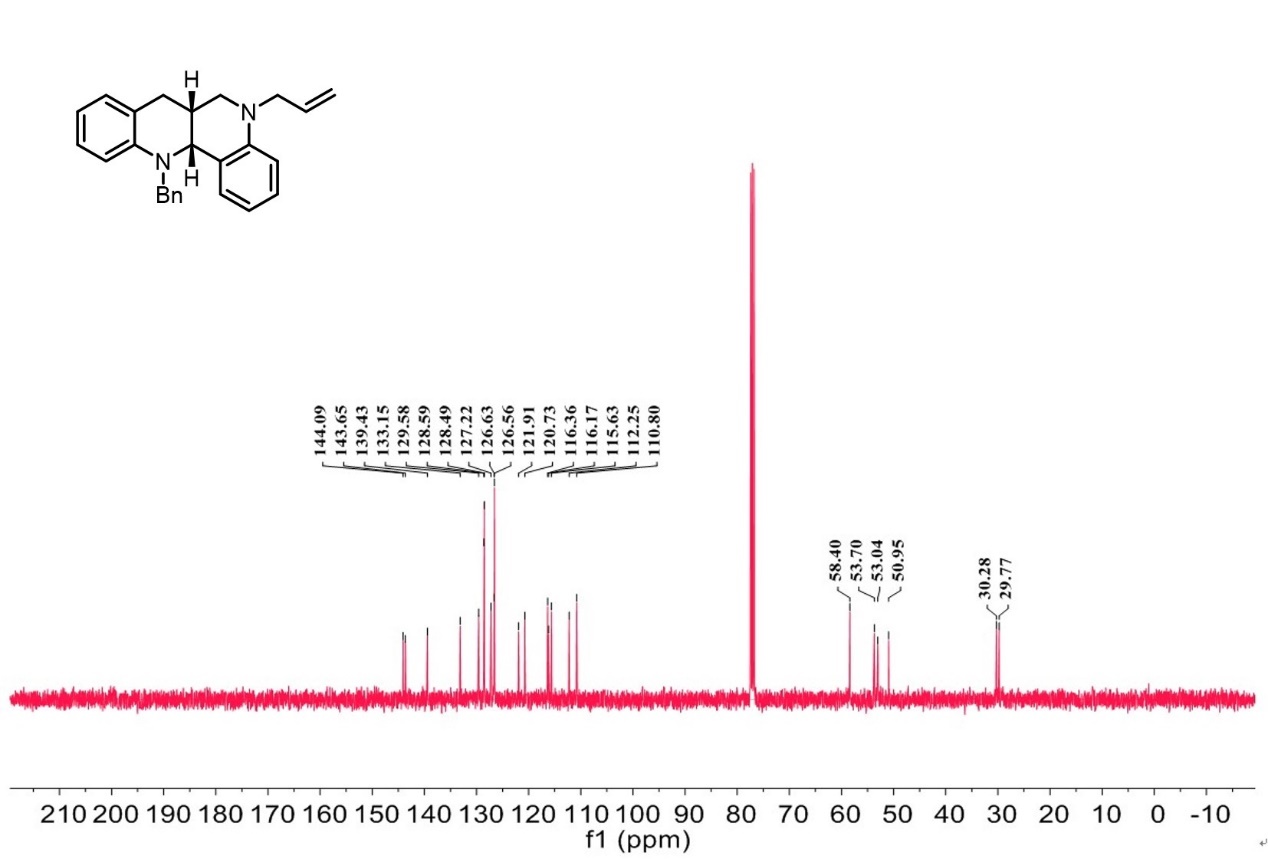
**

**1H-NMR spectrum of C32**

**
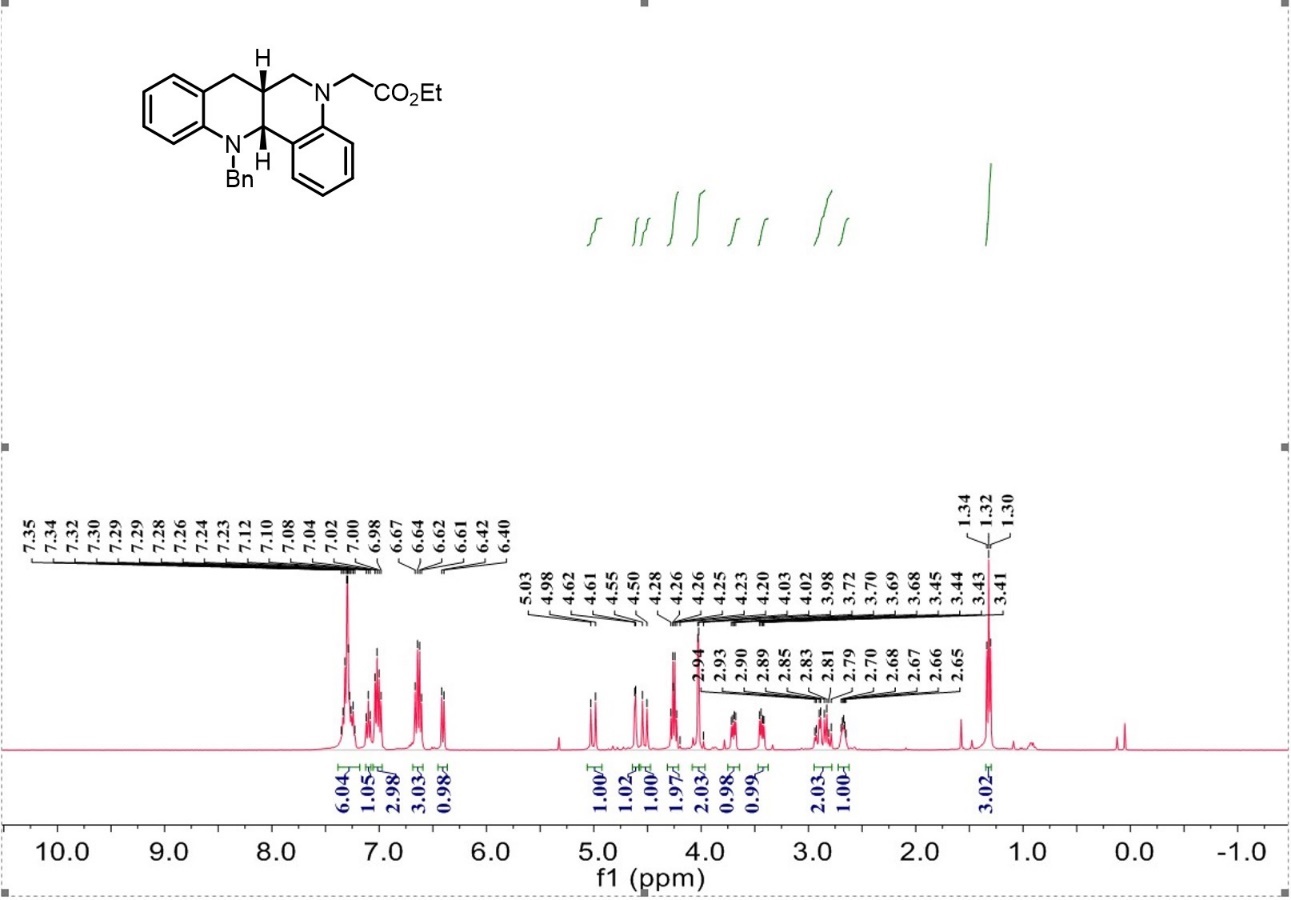
**

**13C-NMR spectrum of C32**

**
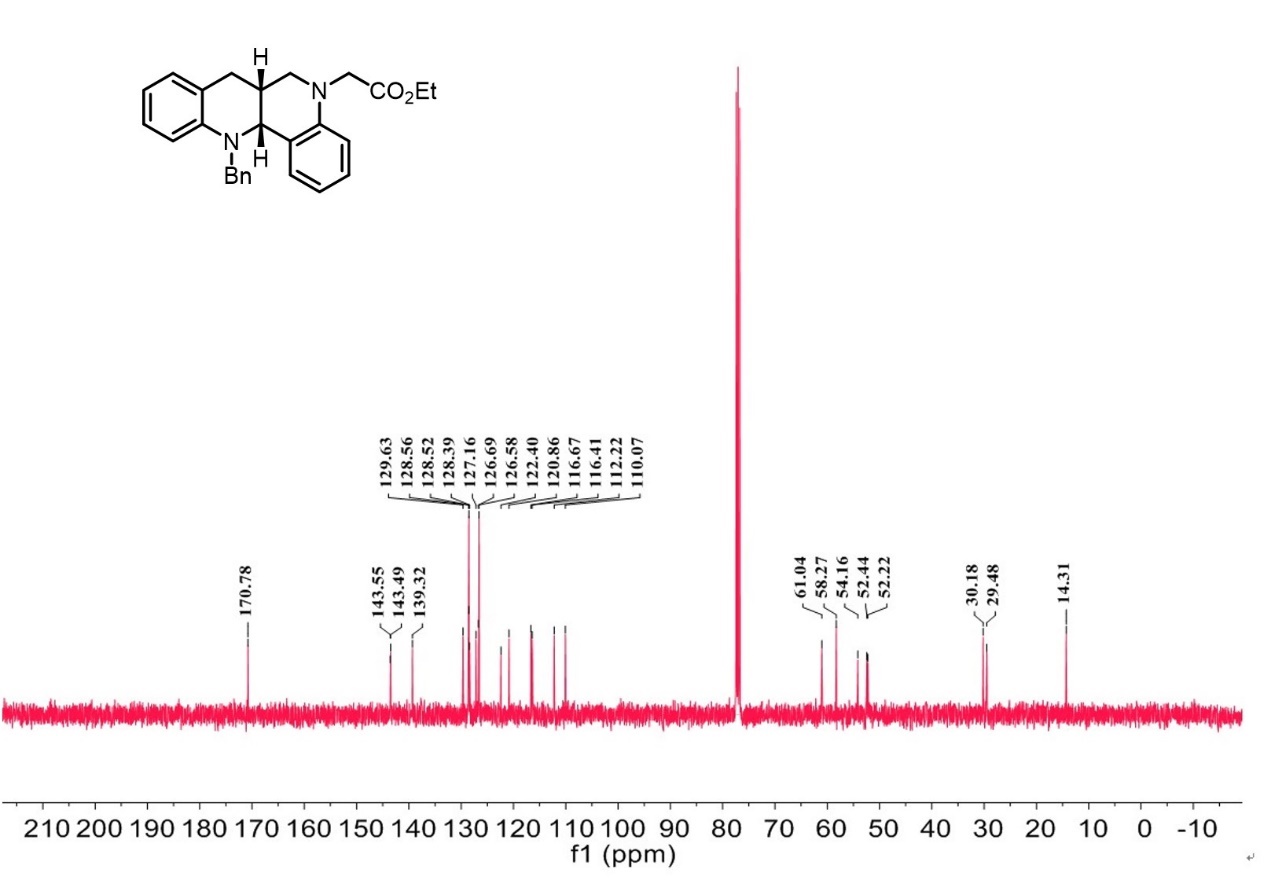
**

**1H-NMR spectrum of C33**

**
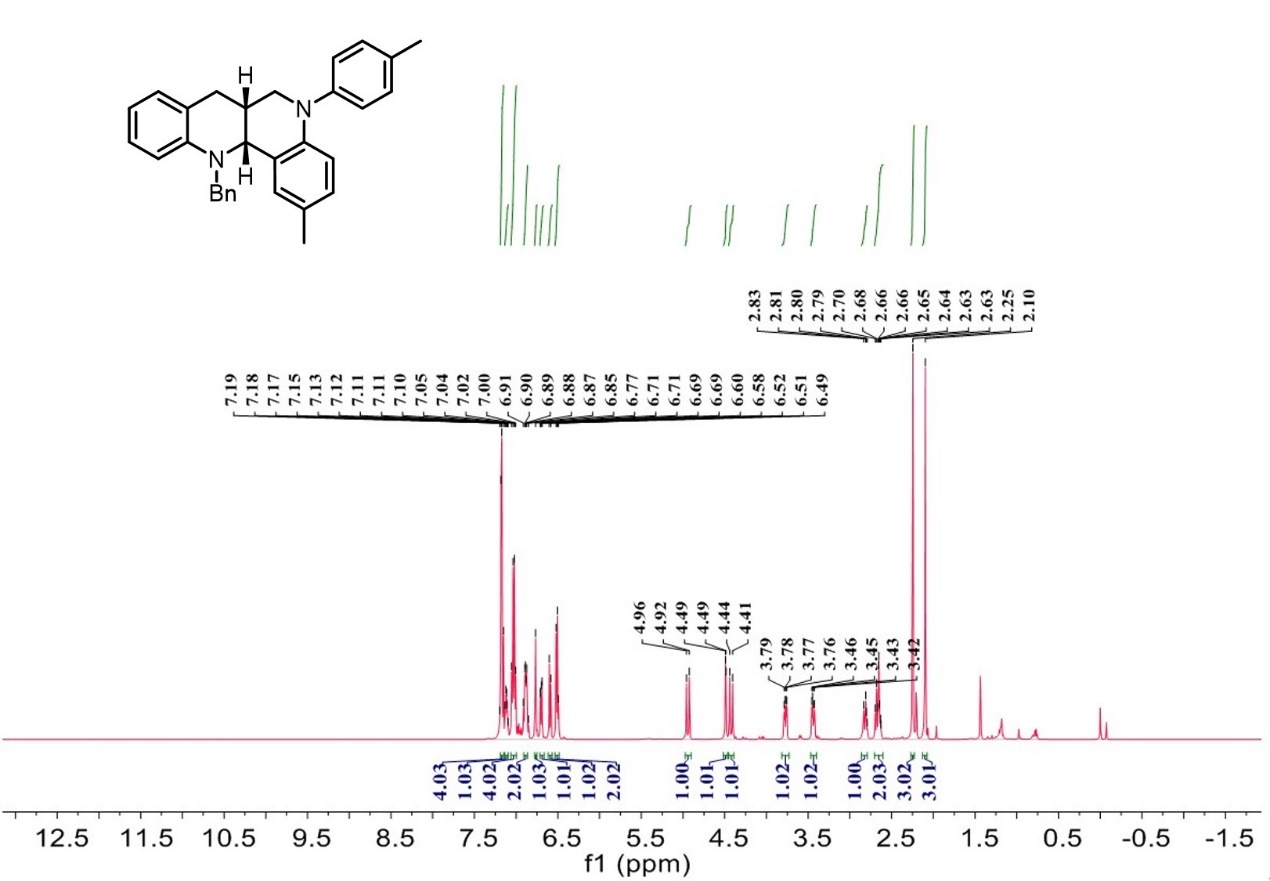
**

**13C-NMR spectrum of C33**

**
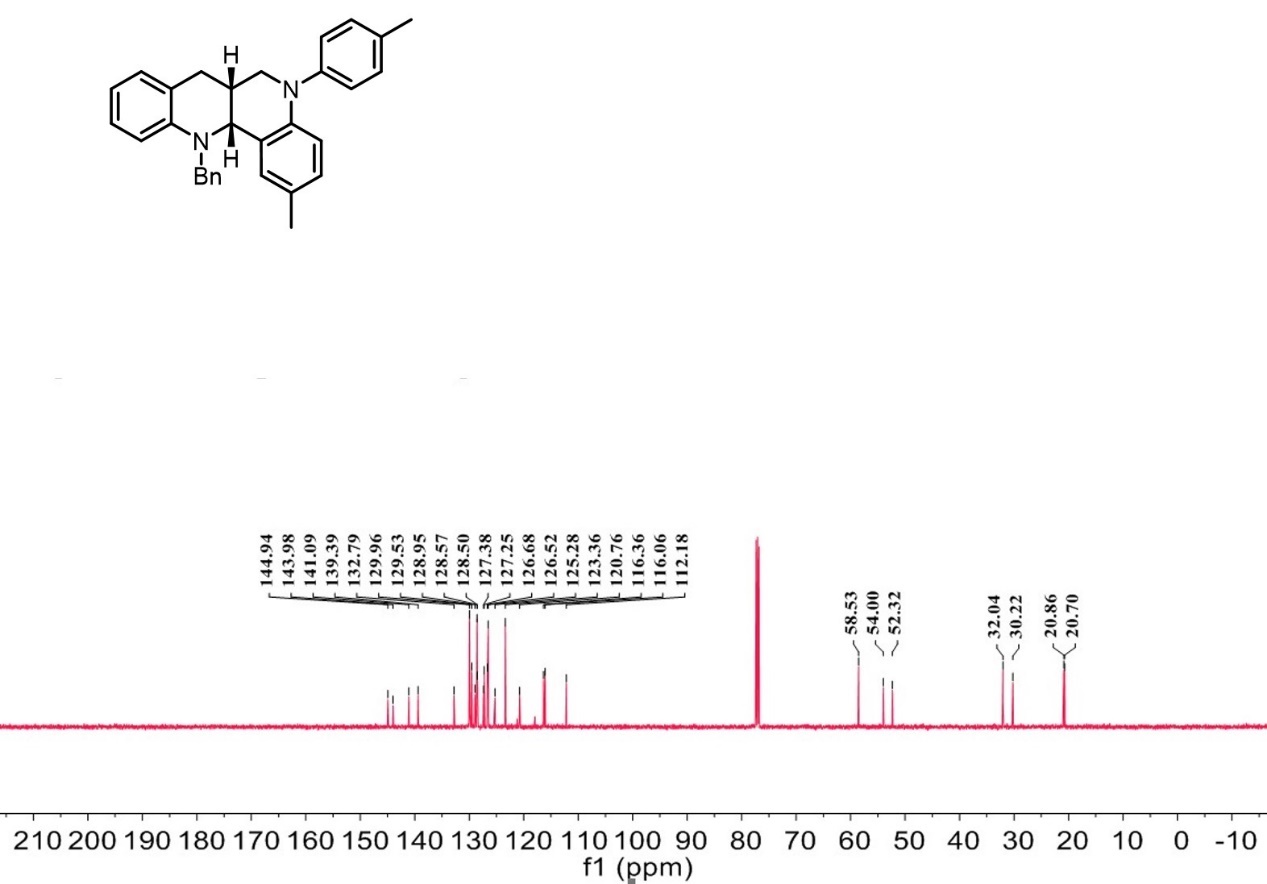
**

**1H-NMR spectrum of C34**


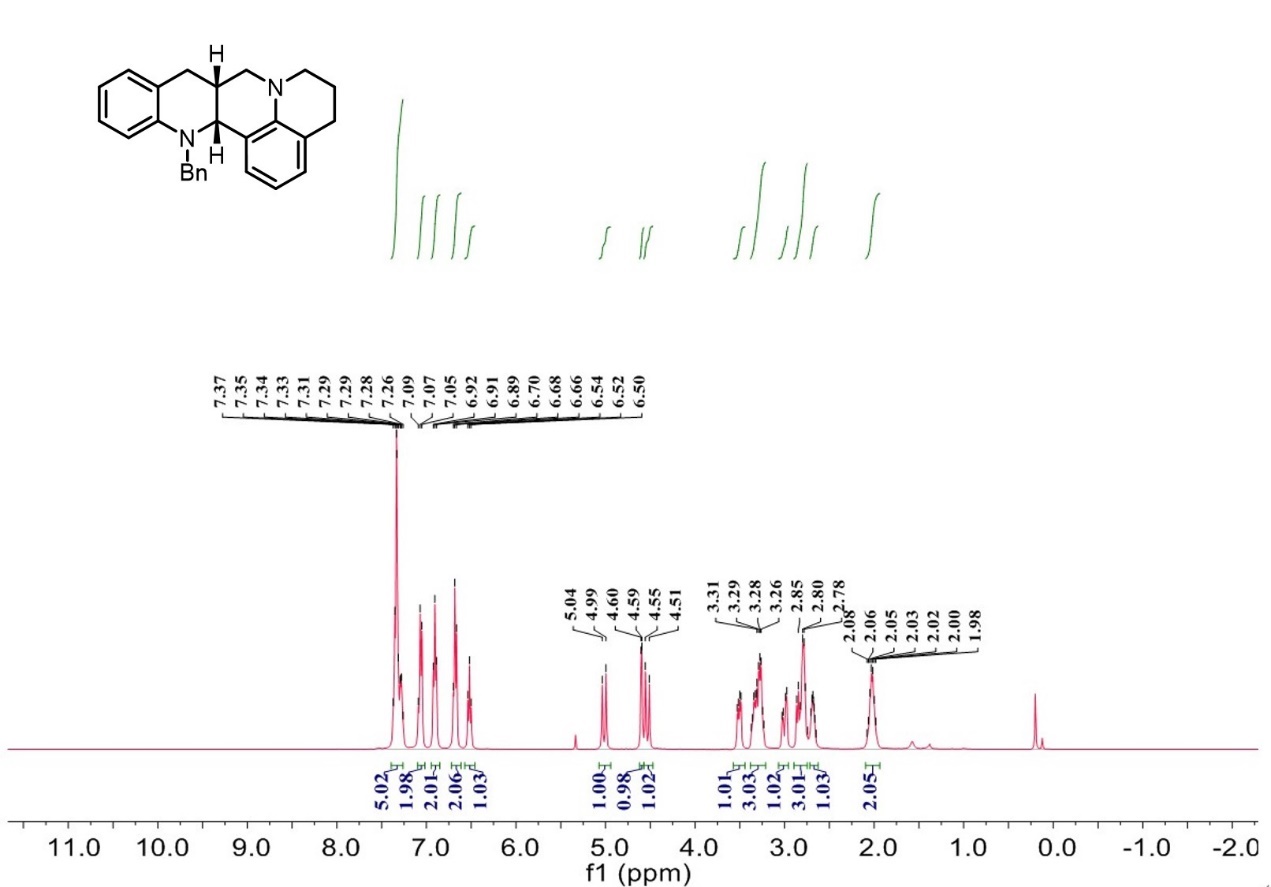


**13C-NMR spectrum of C34**


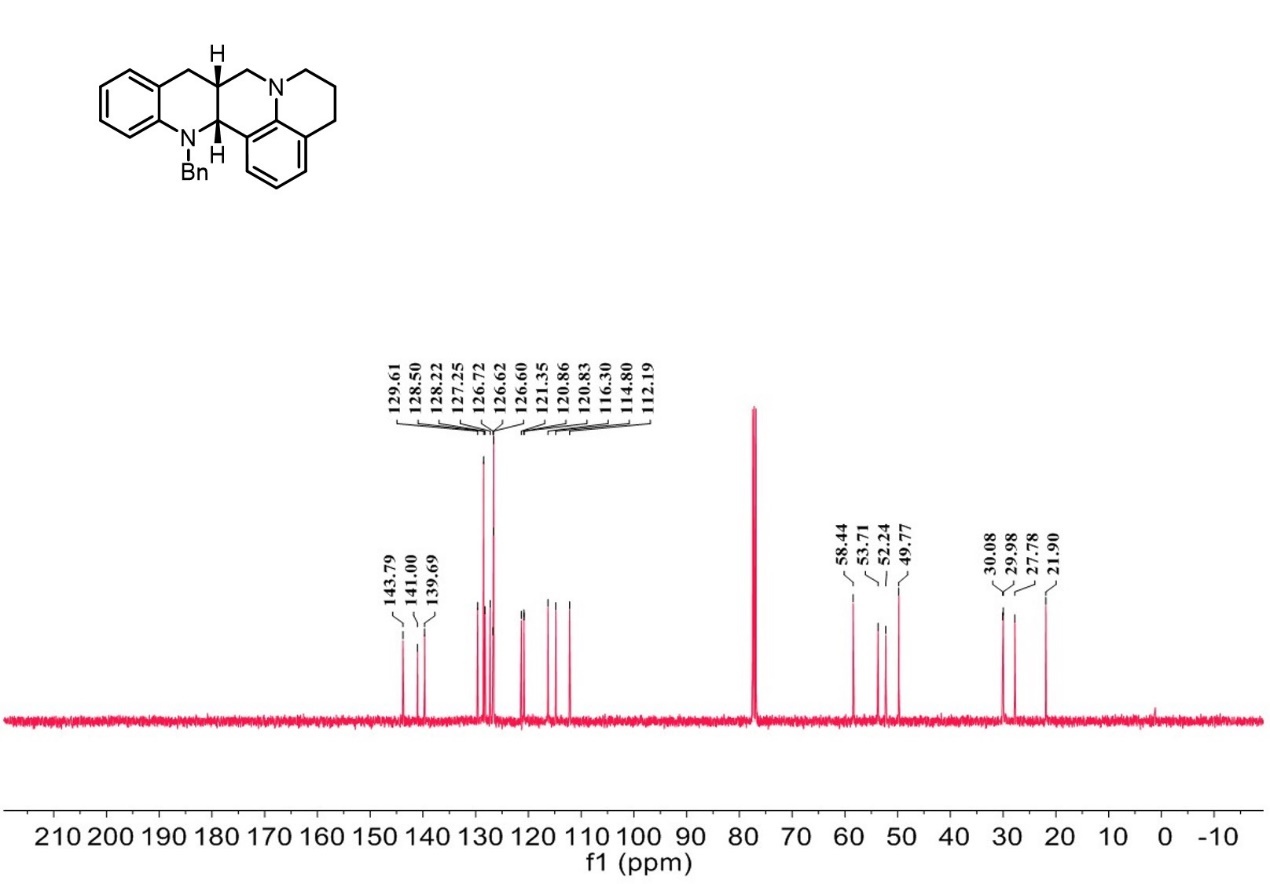


**1H-NMR spectrum of C35**


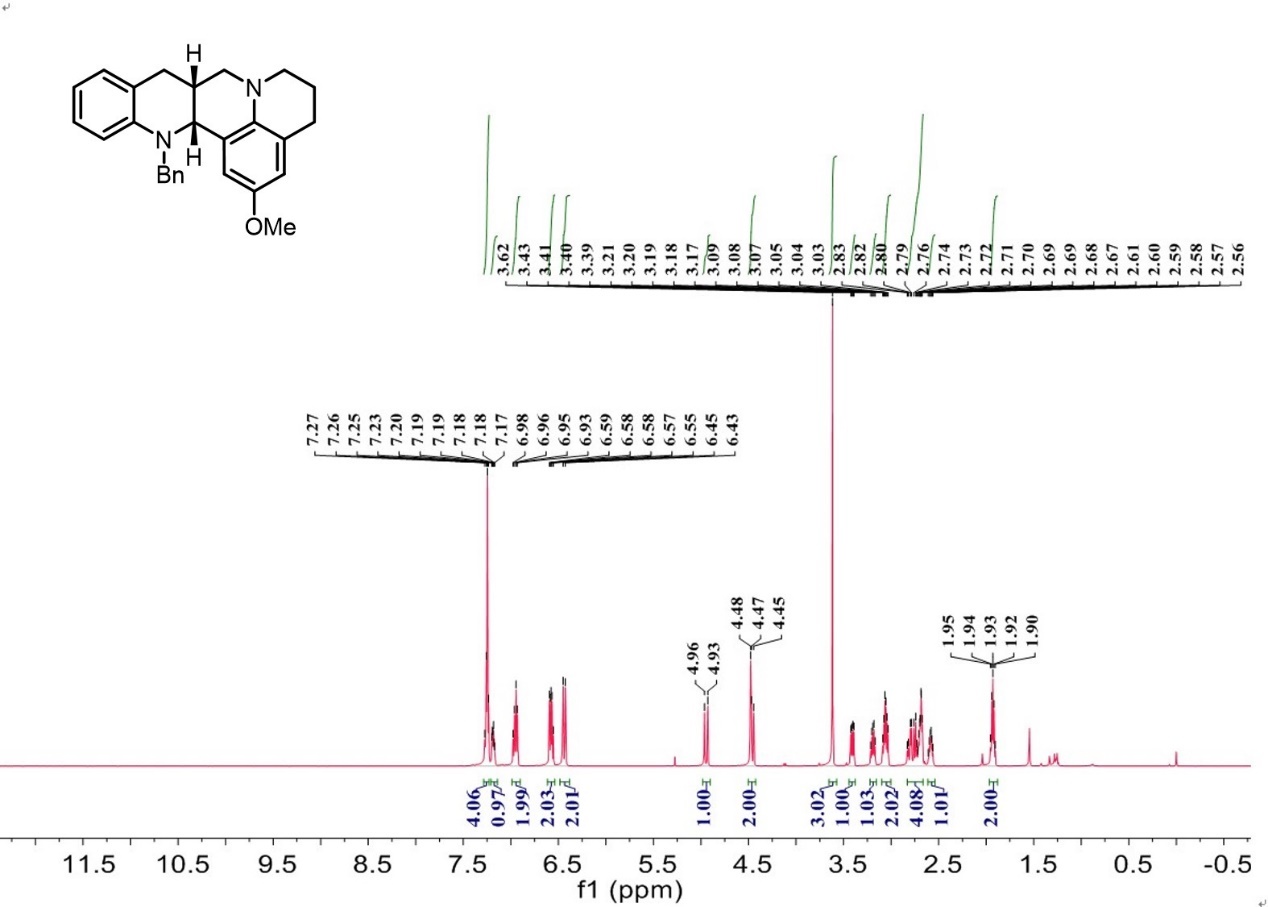


**13C-NMR spectrum of C35**


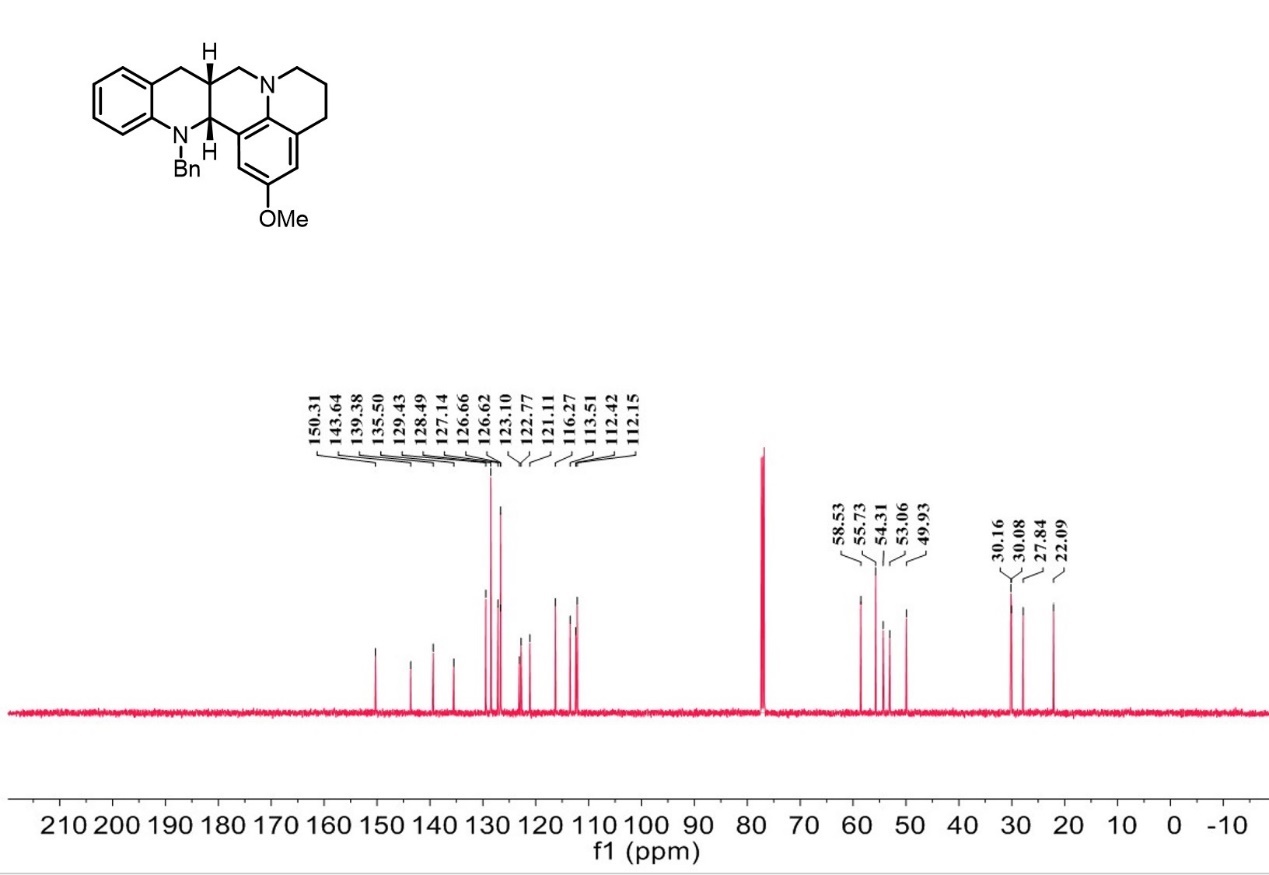


**1H-NMR spectrum of C36**

**
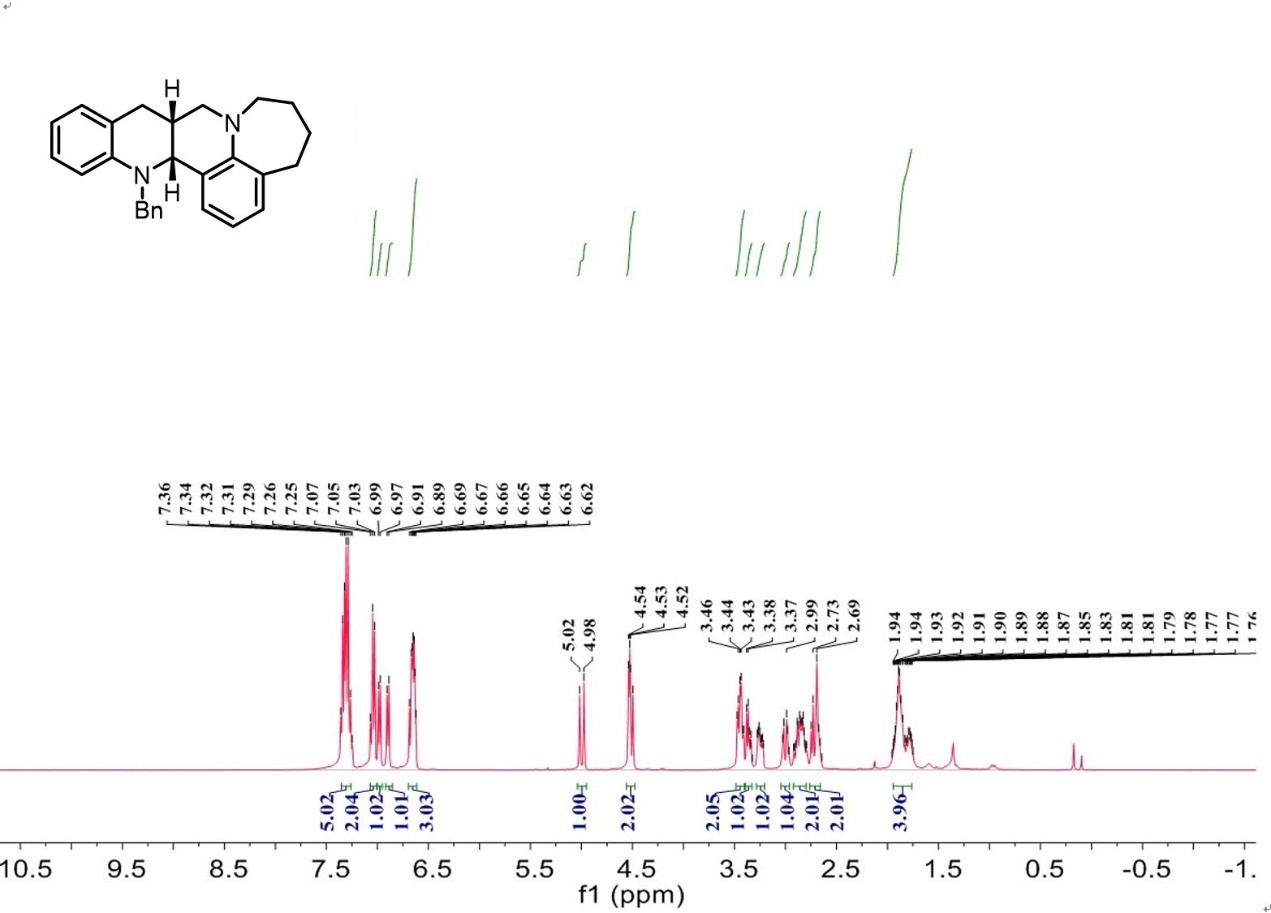
**

**13C-NMR spectrum of C36**

**
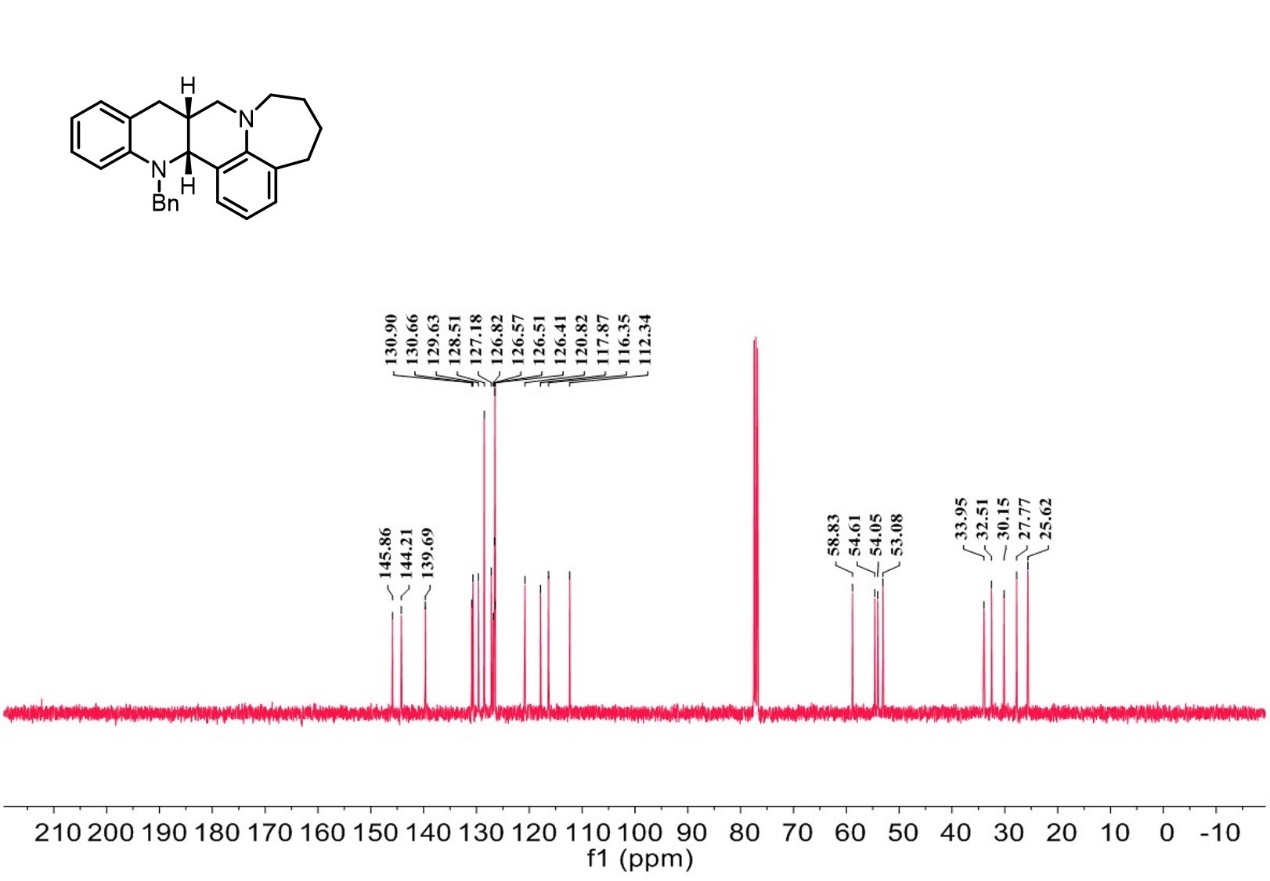
**

**1H-NMR spectrum of C37**

**
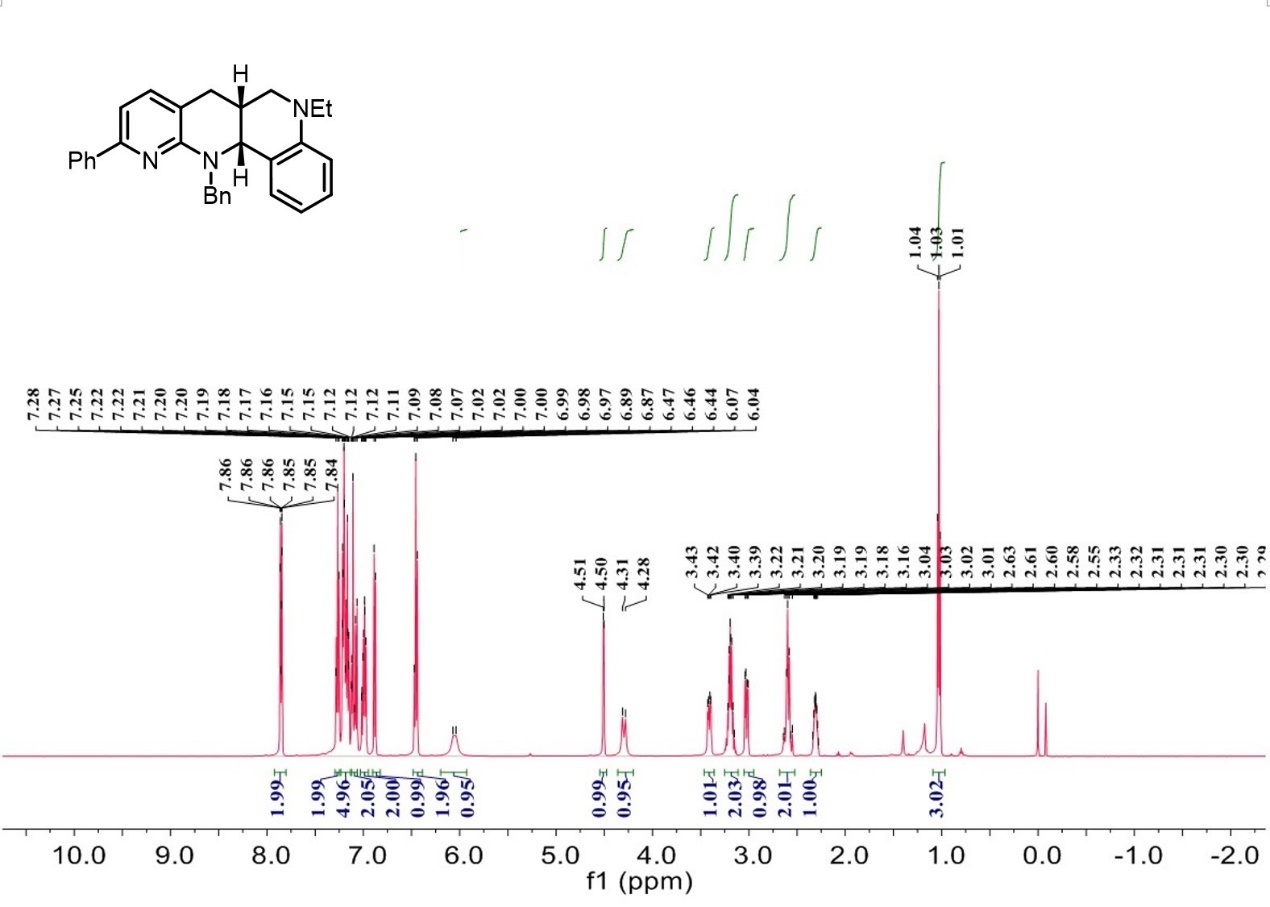
**

**13C-NMR spectrum of C37**


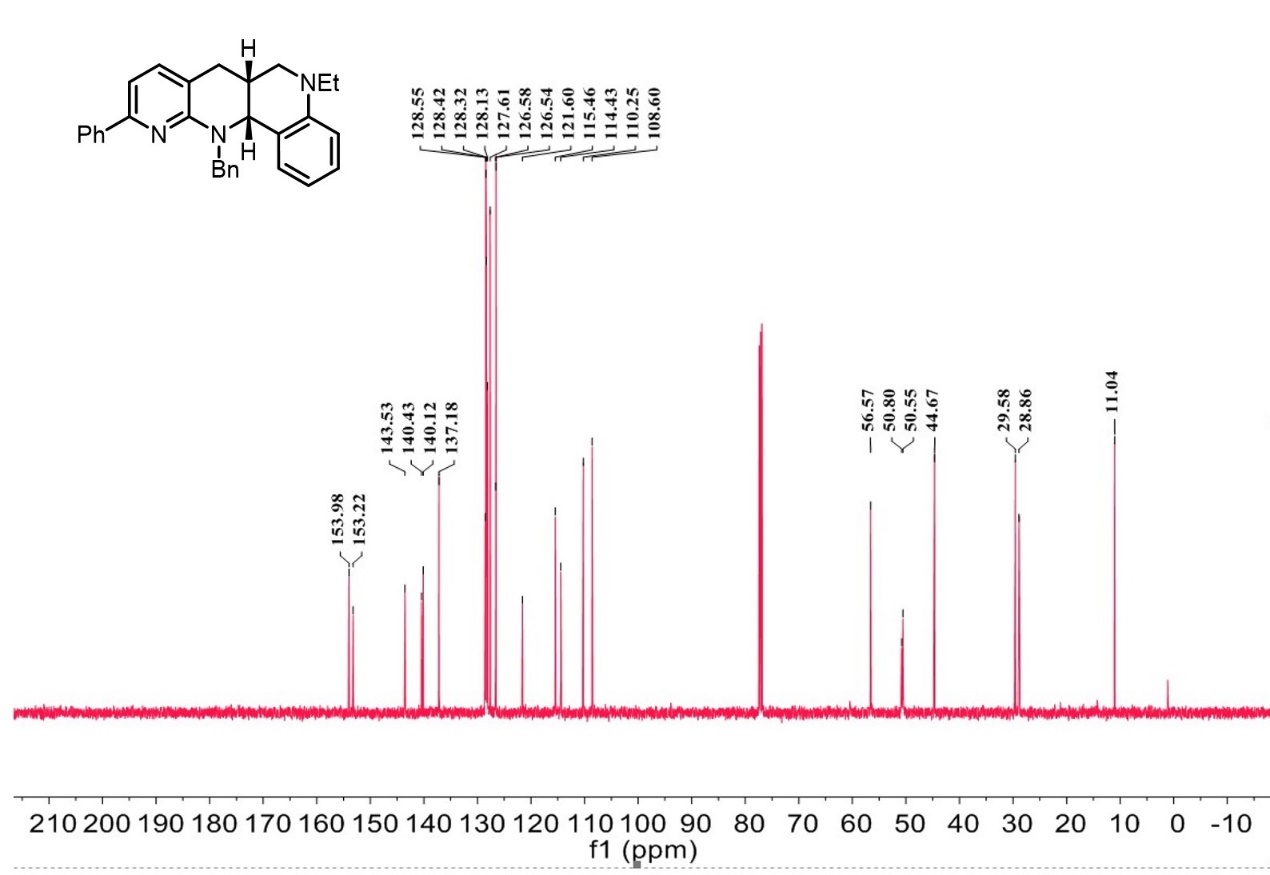


**1H-NMR spectrum of C38**

**
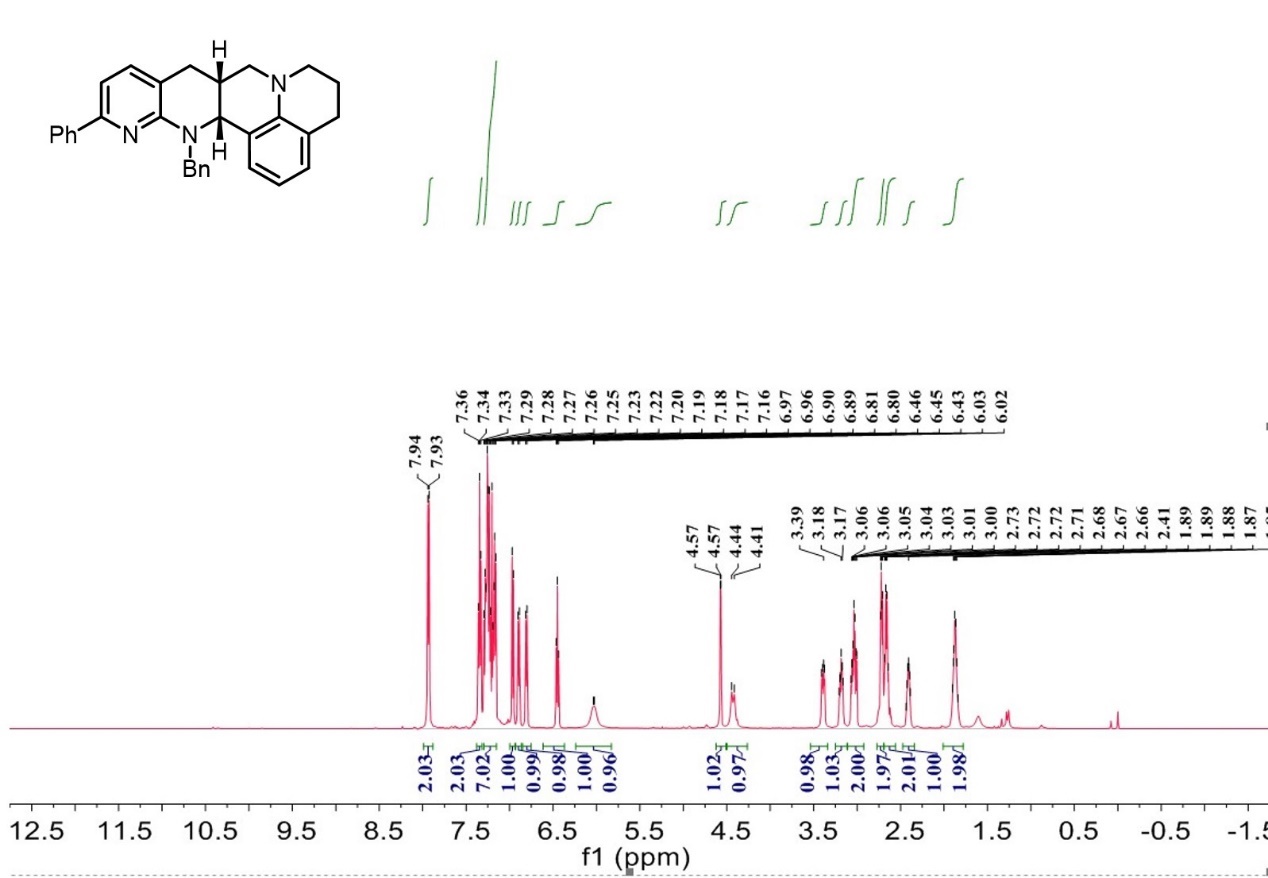
**

**13C-NMR spectrum of C38**

**
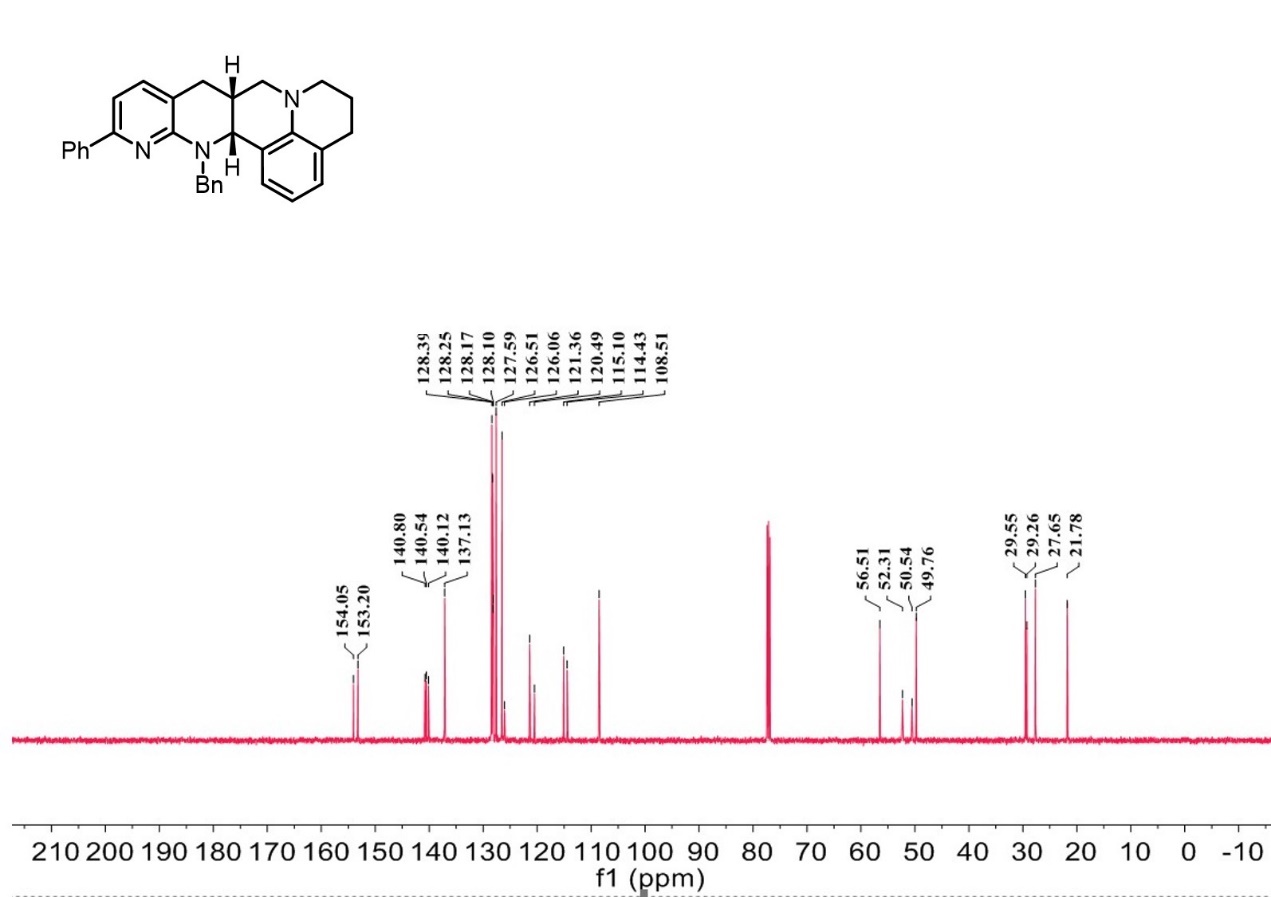
**

**1H-NMR spectrum of C39**

**
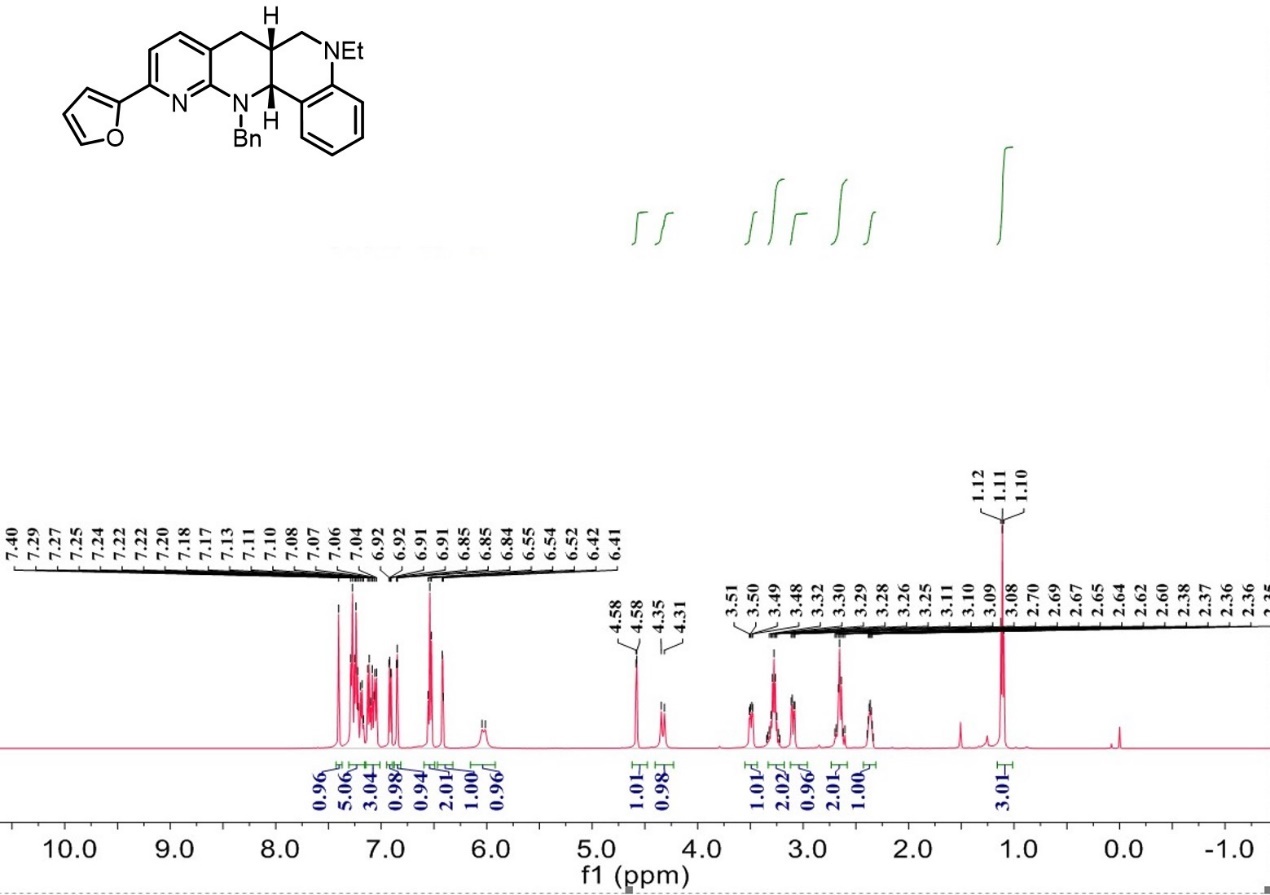
**

**13C-NMR spectrum of C39**

**
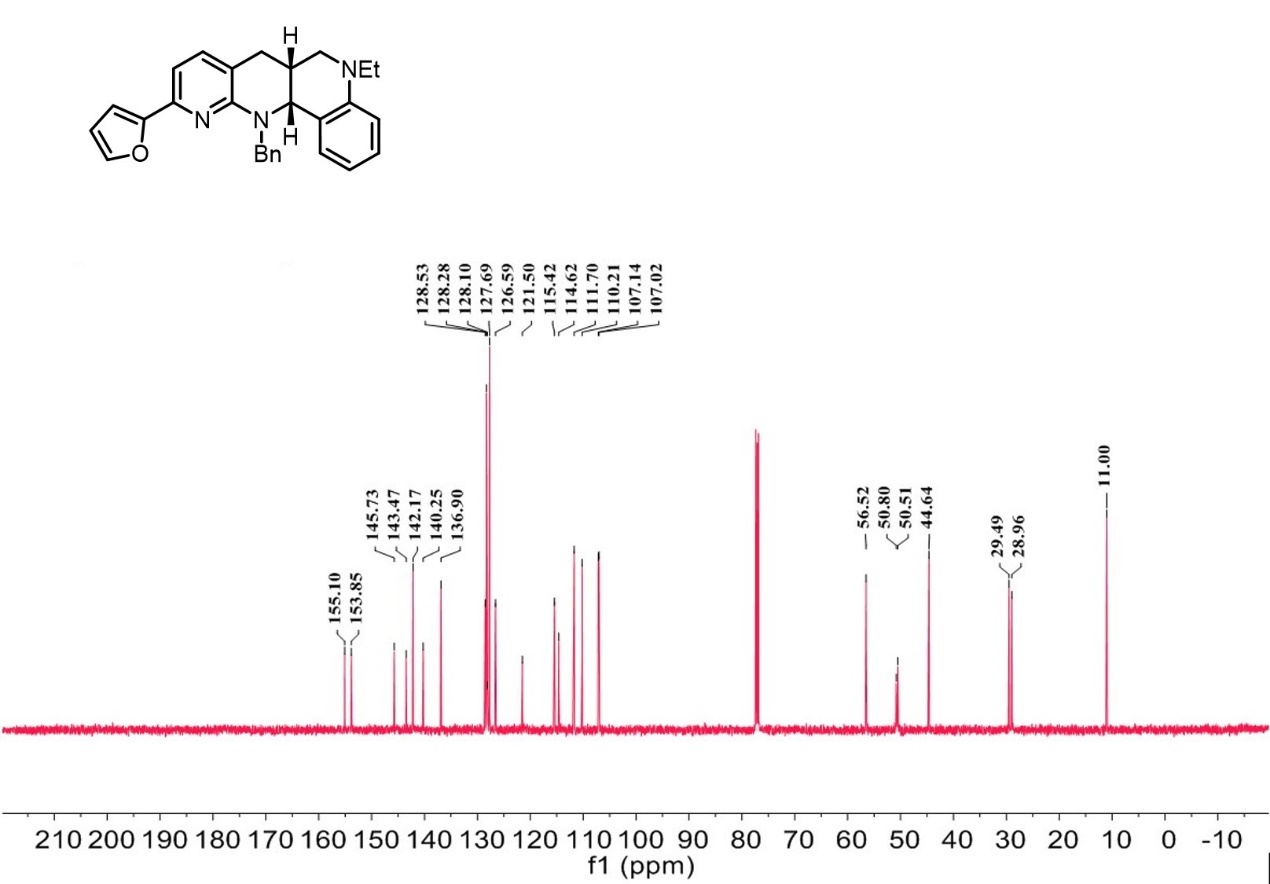
**

**1H-NMR spectrum of C40**

**
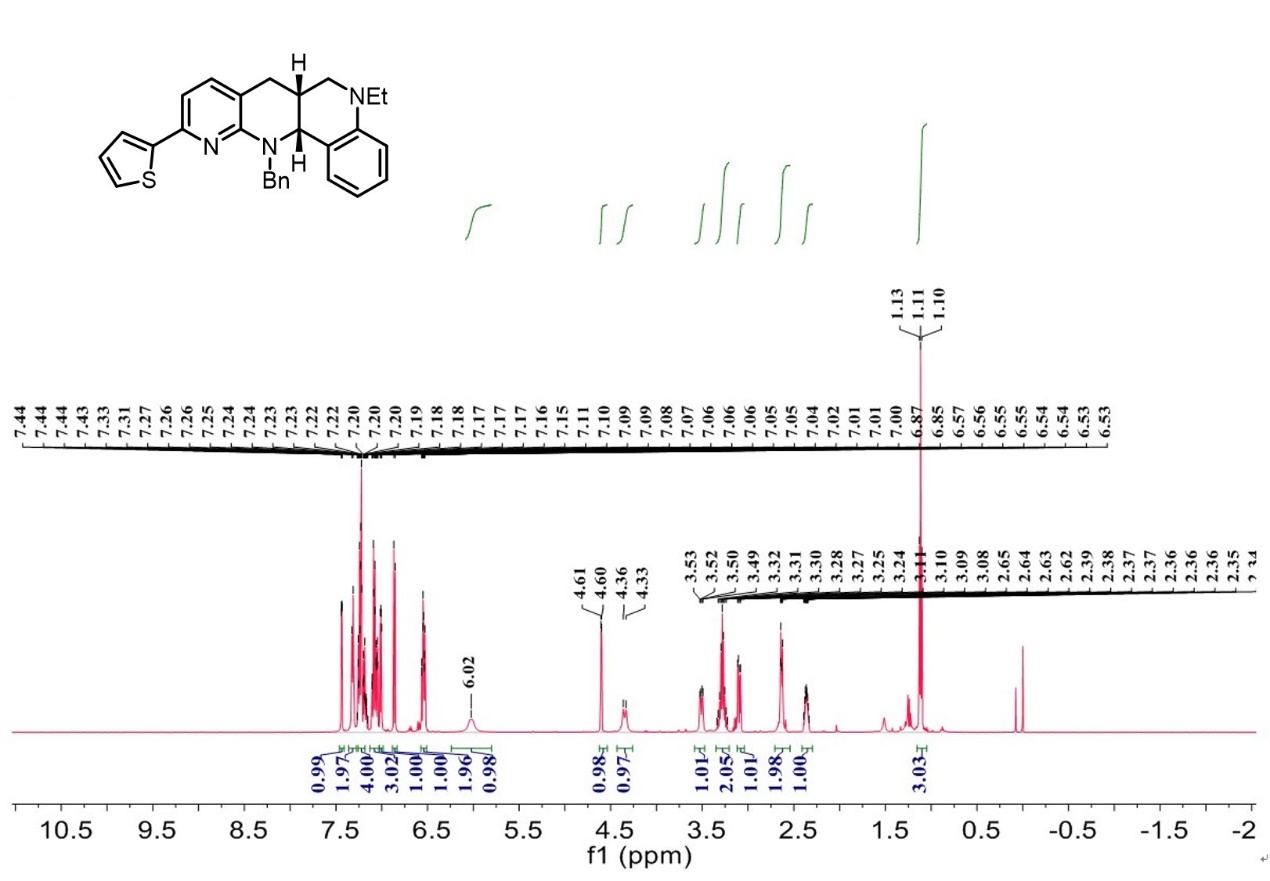
**

**13C-NMR spectrum of C40**

**
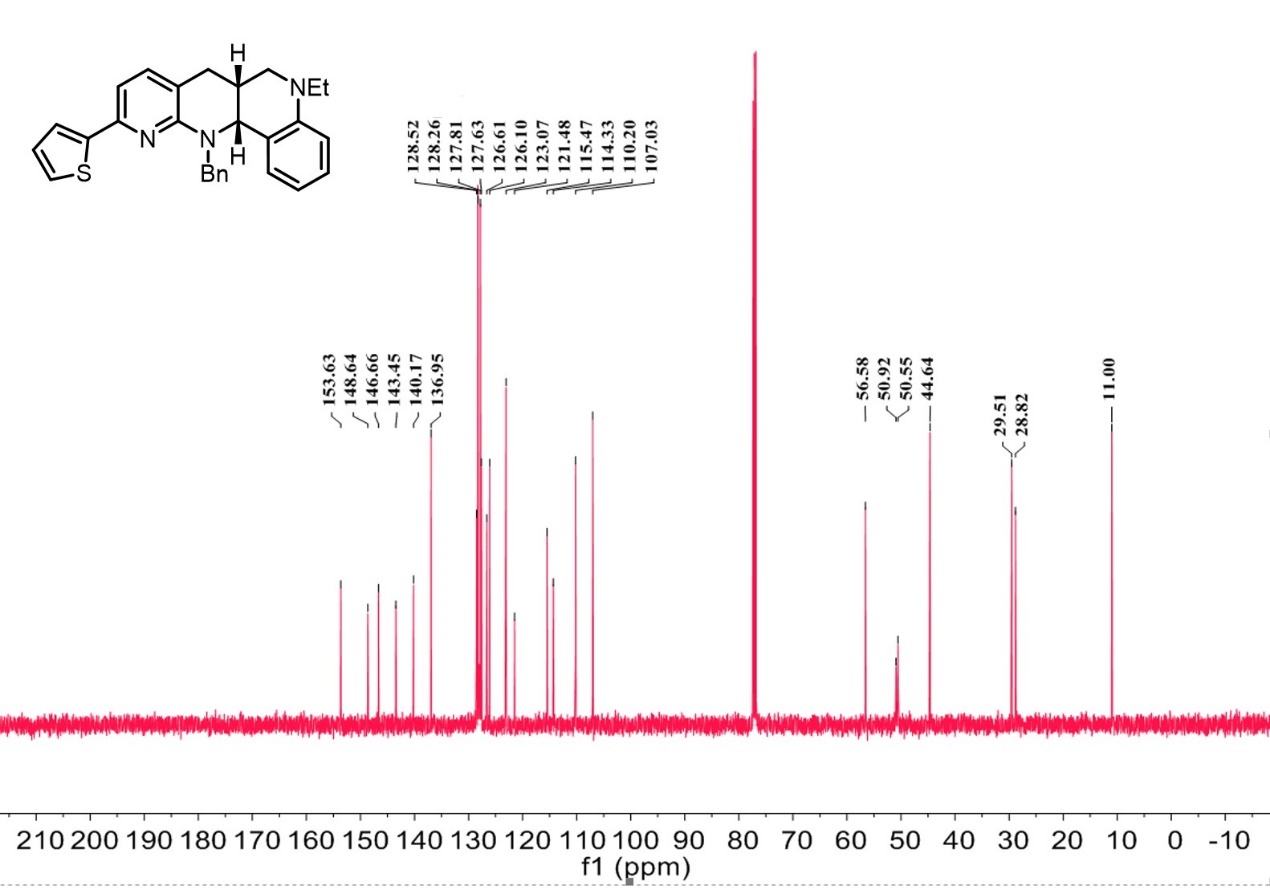
**

**1H-NMR spectrum of C41**

**
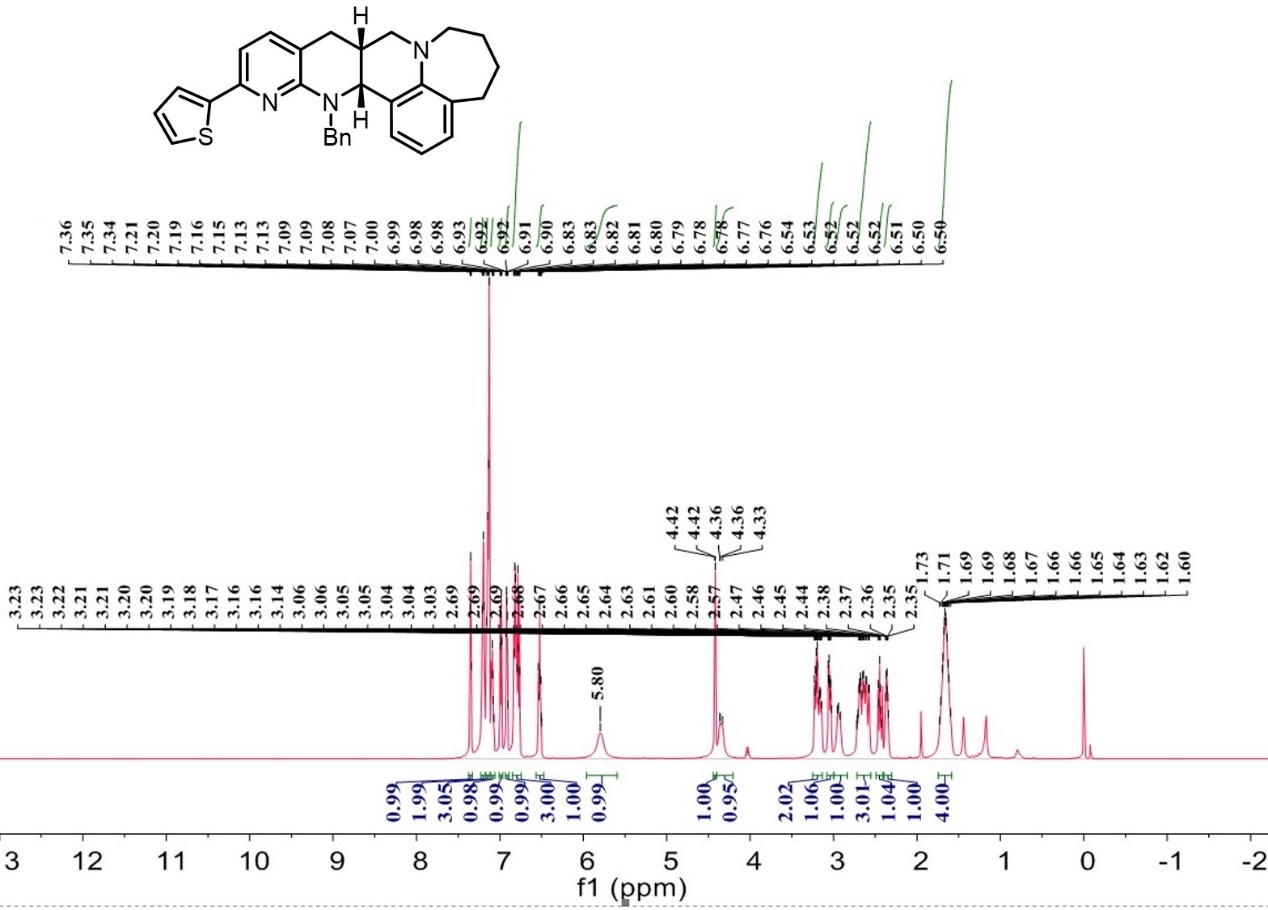
**

**13C-NMR spectrum of C41**

**
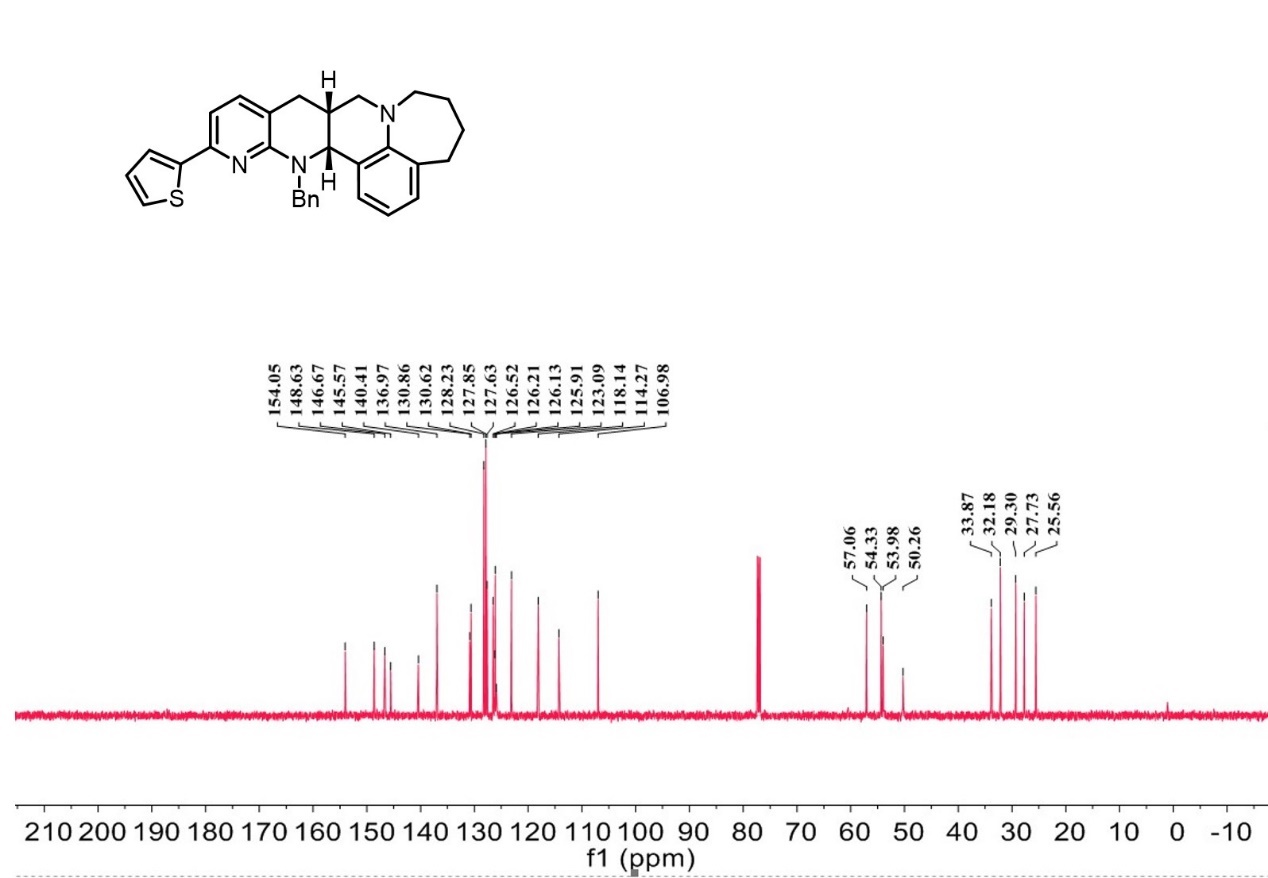
**

**1H-NMR spectrum of C42**

**
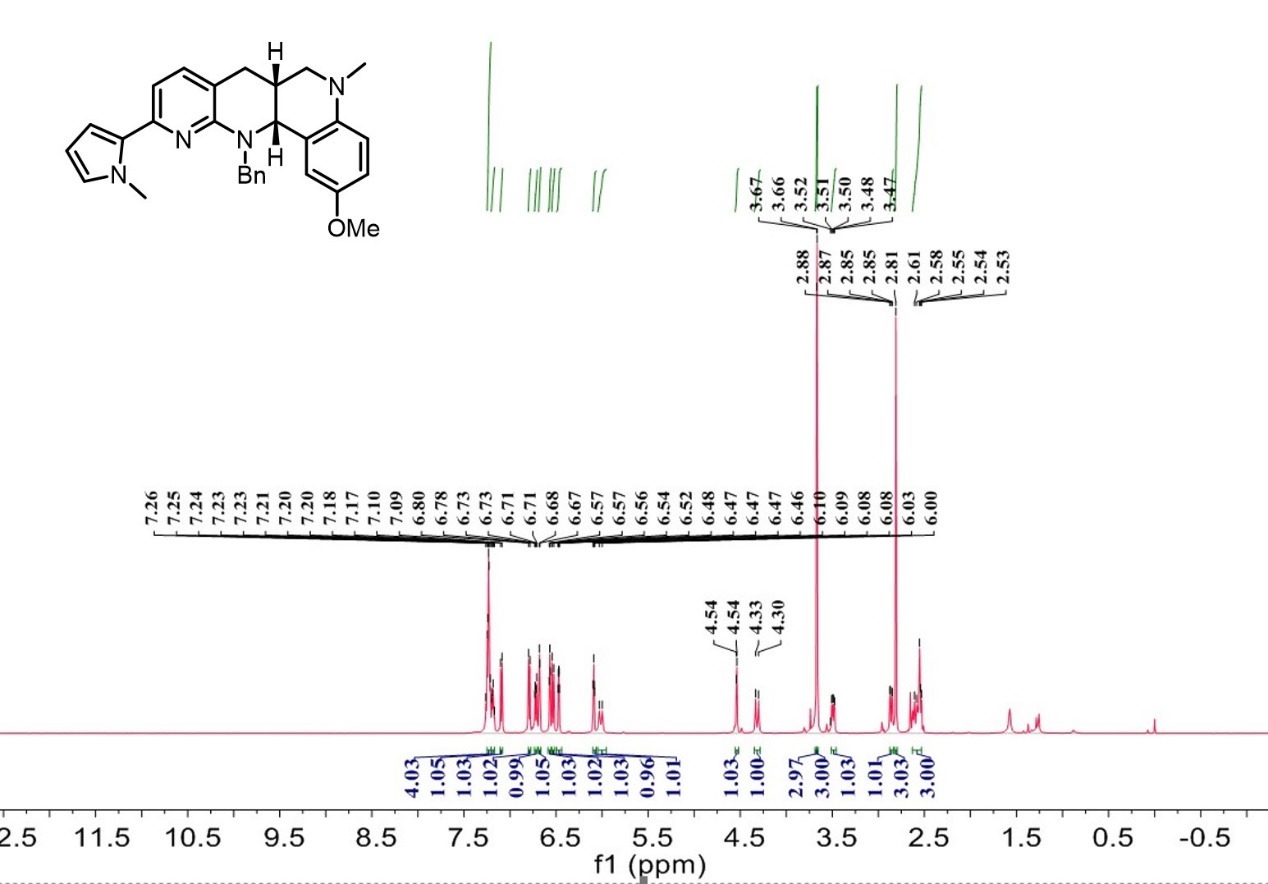
**

**13C-NMR spectrum of C42**

**
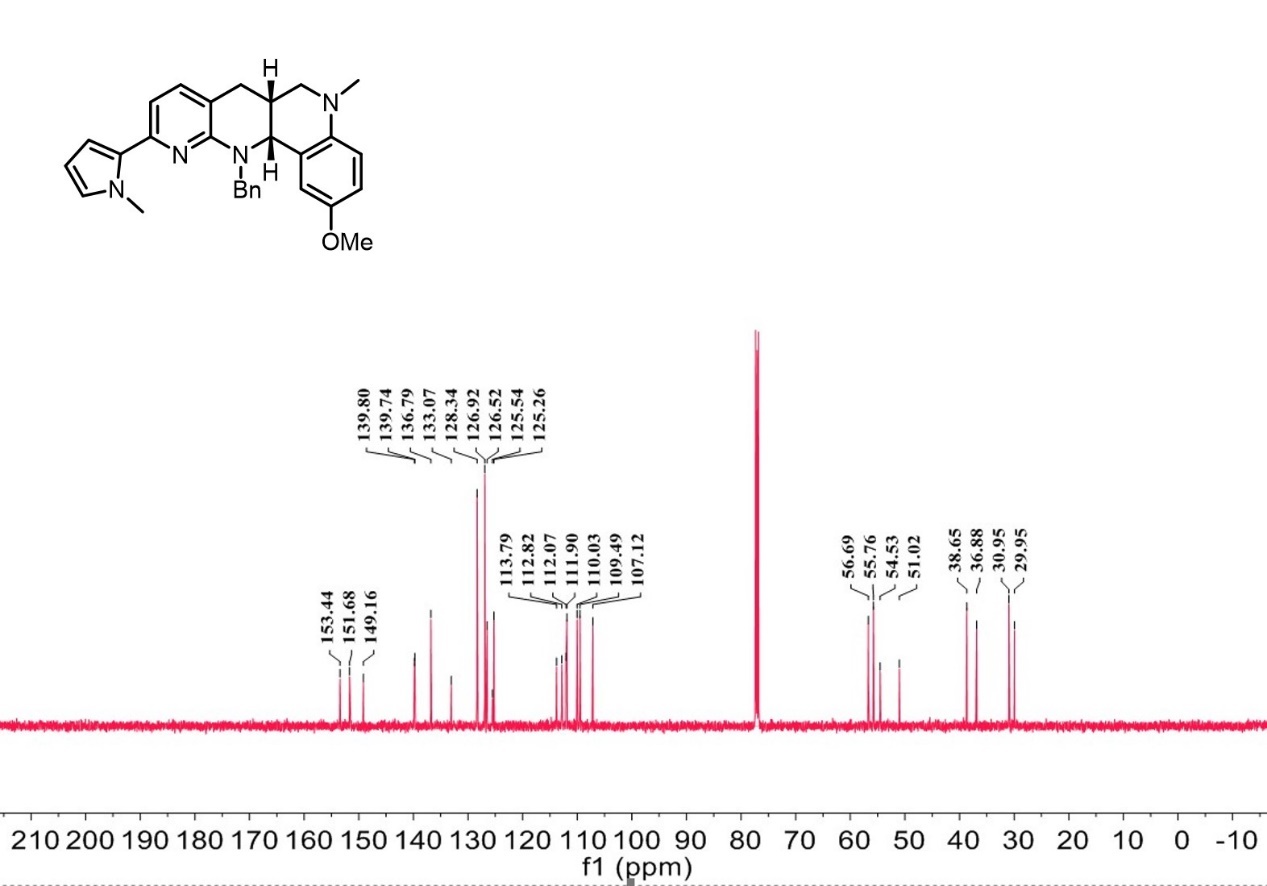
**

**1H-NMR spectrum of C43**

**
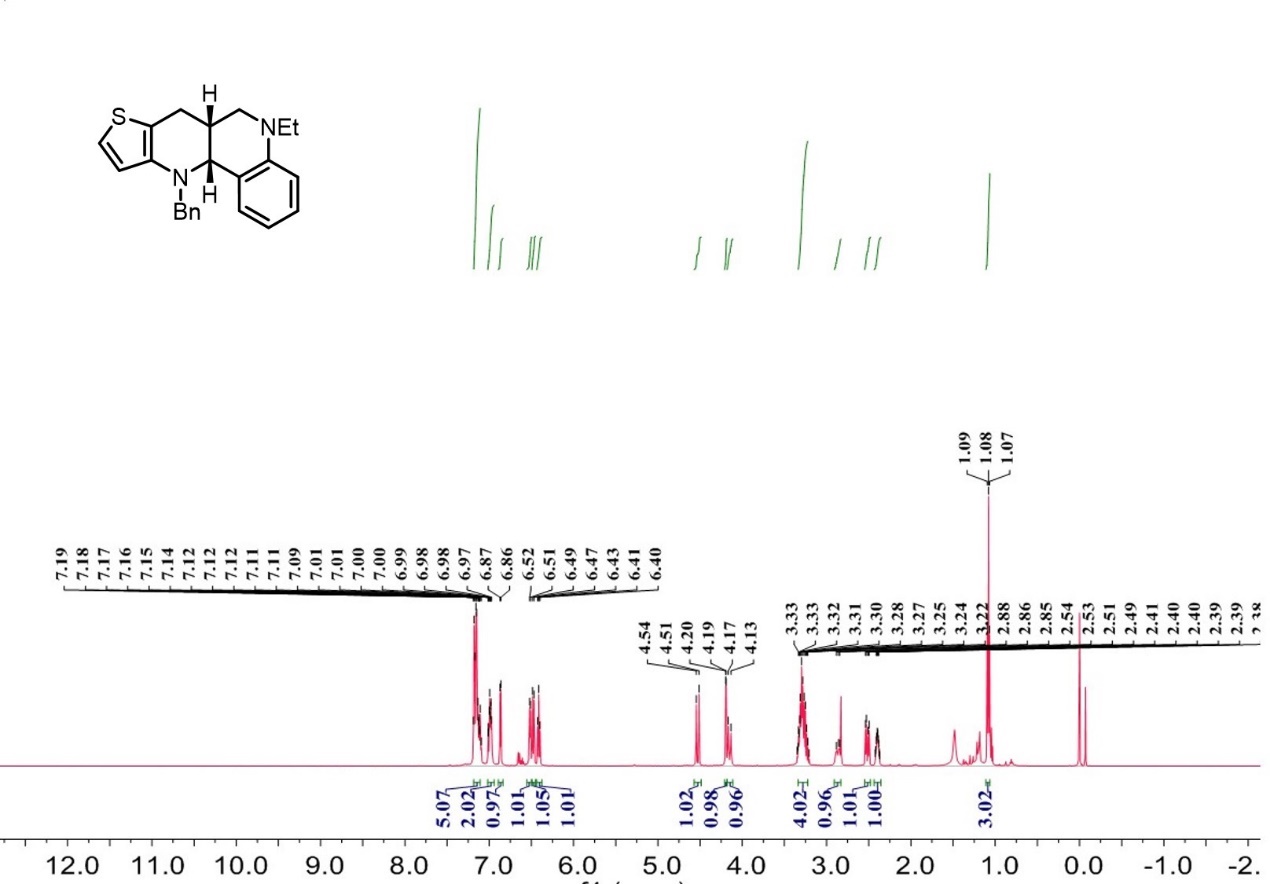
**

**13C-NMR spectrum of C43**

**
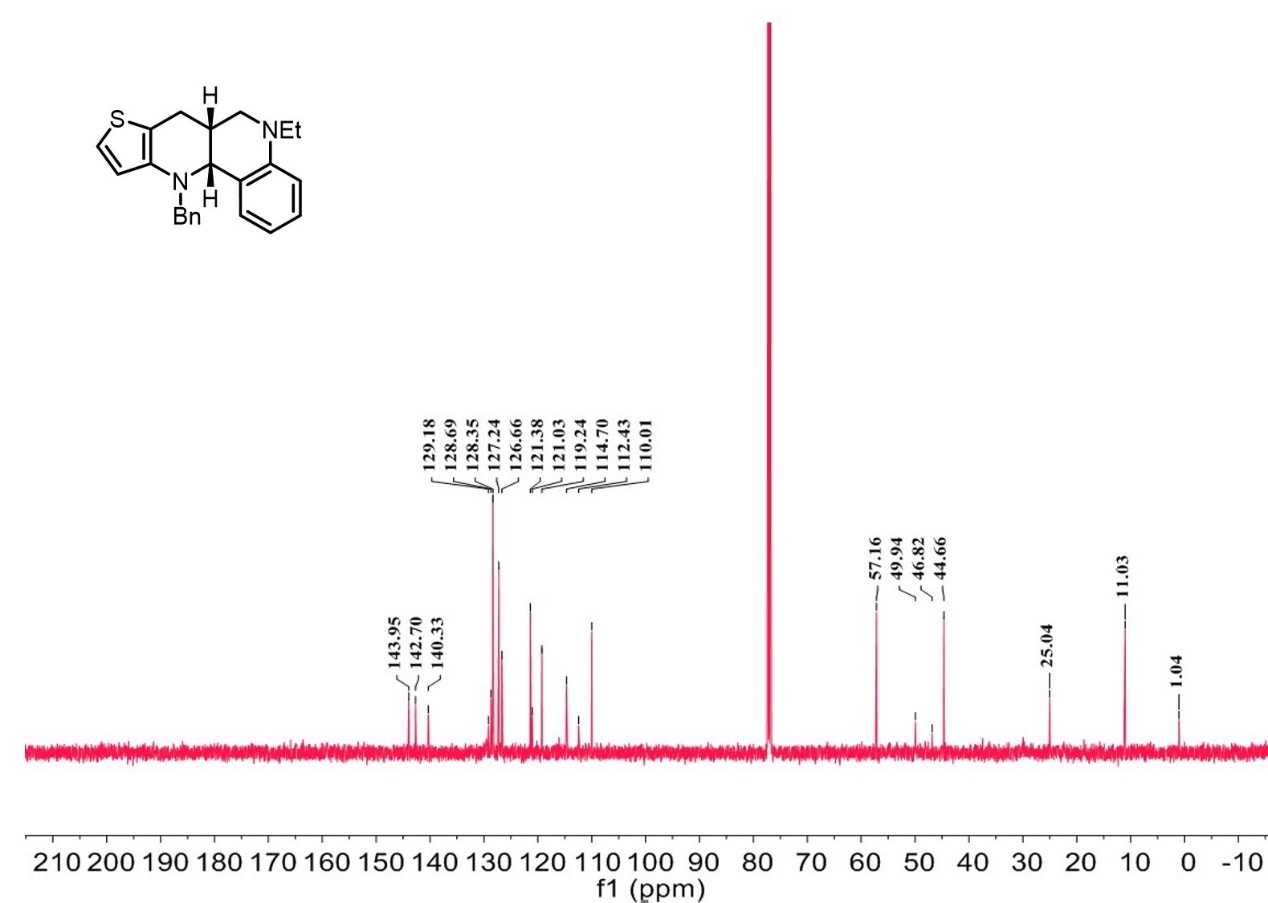
**

**1H-NMR spectrum of C44**

**
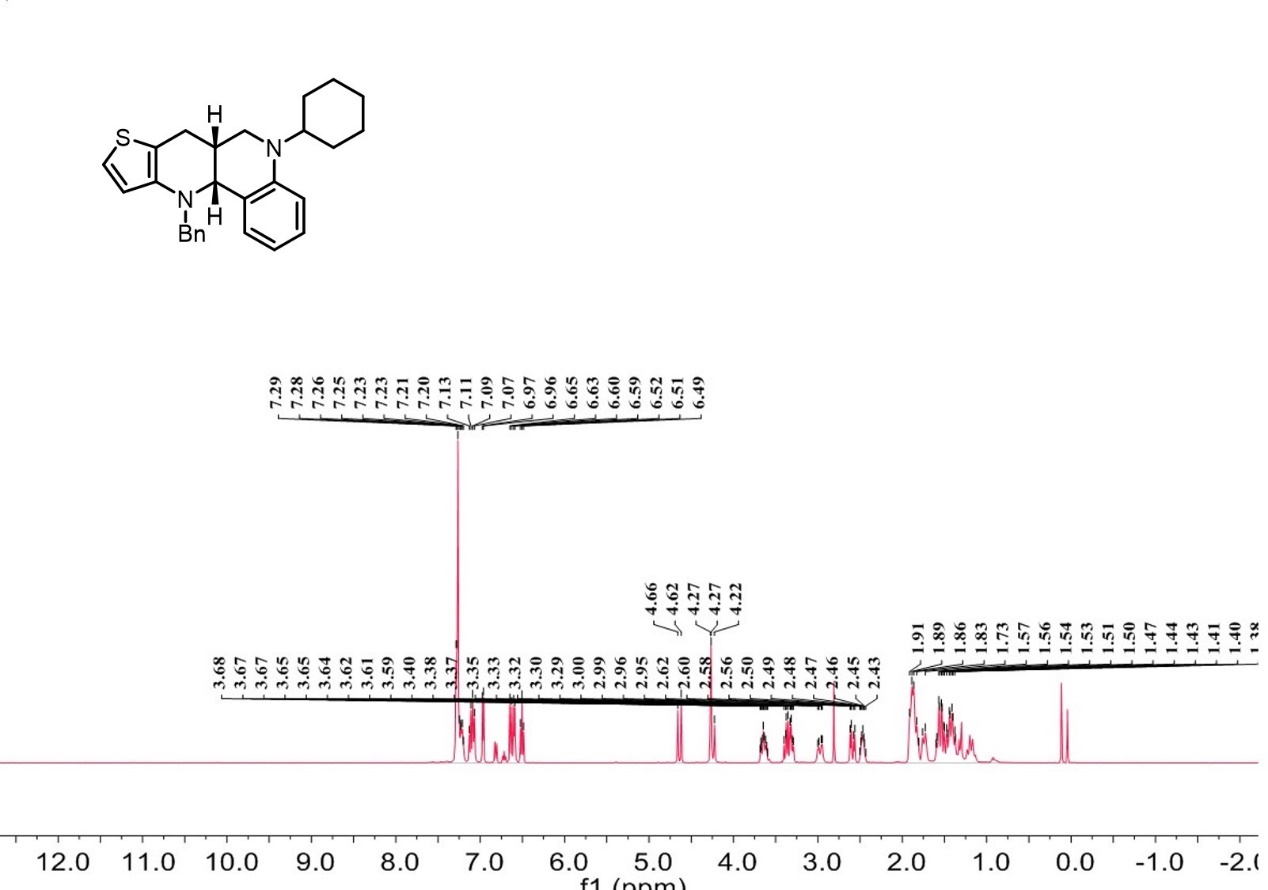
**

**13C-NMR spectrum of C44**

**
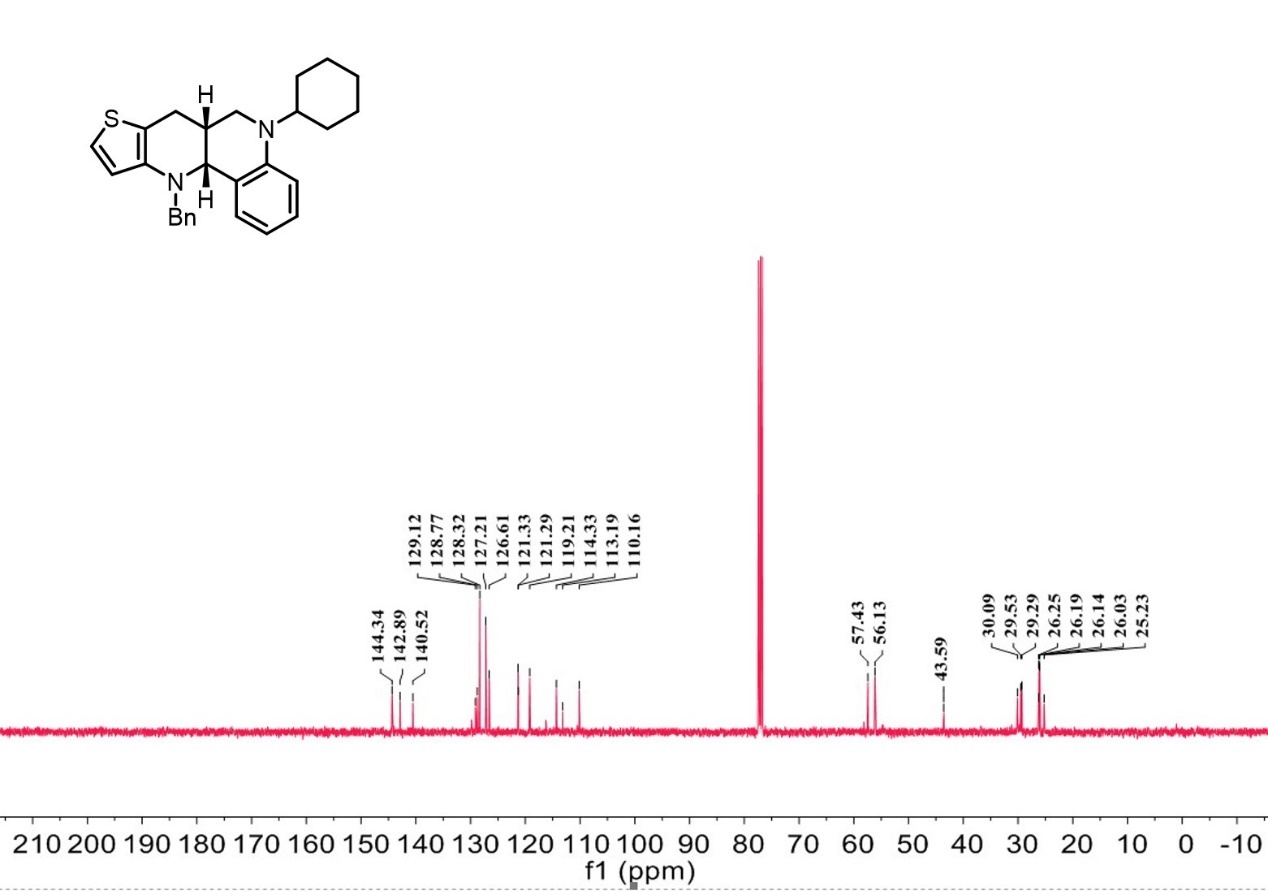
**

**1H-NMR spectrum of C45**

**
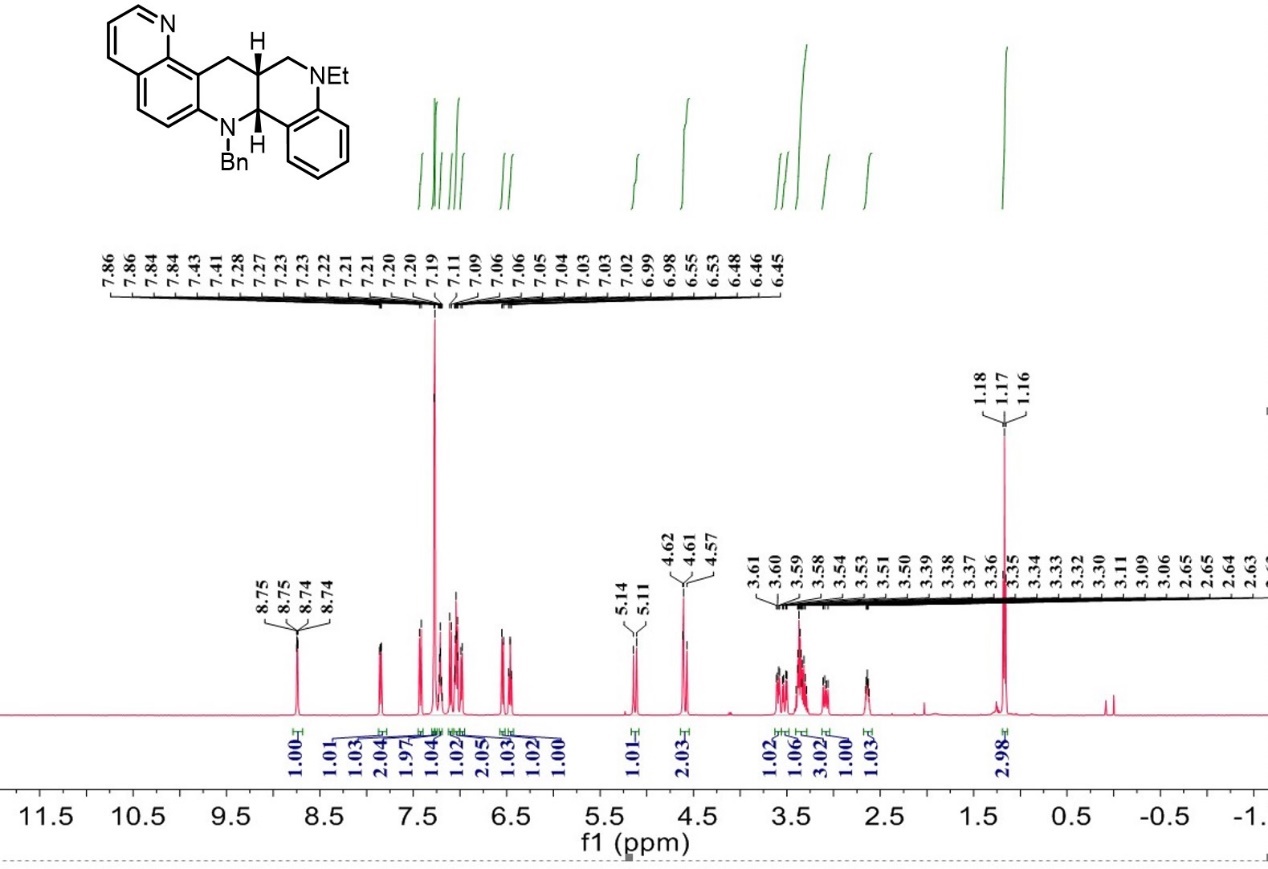
**

**13C-NMR spectrum of C45**

**
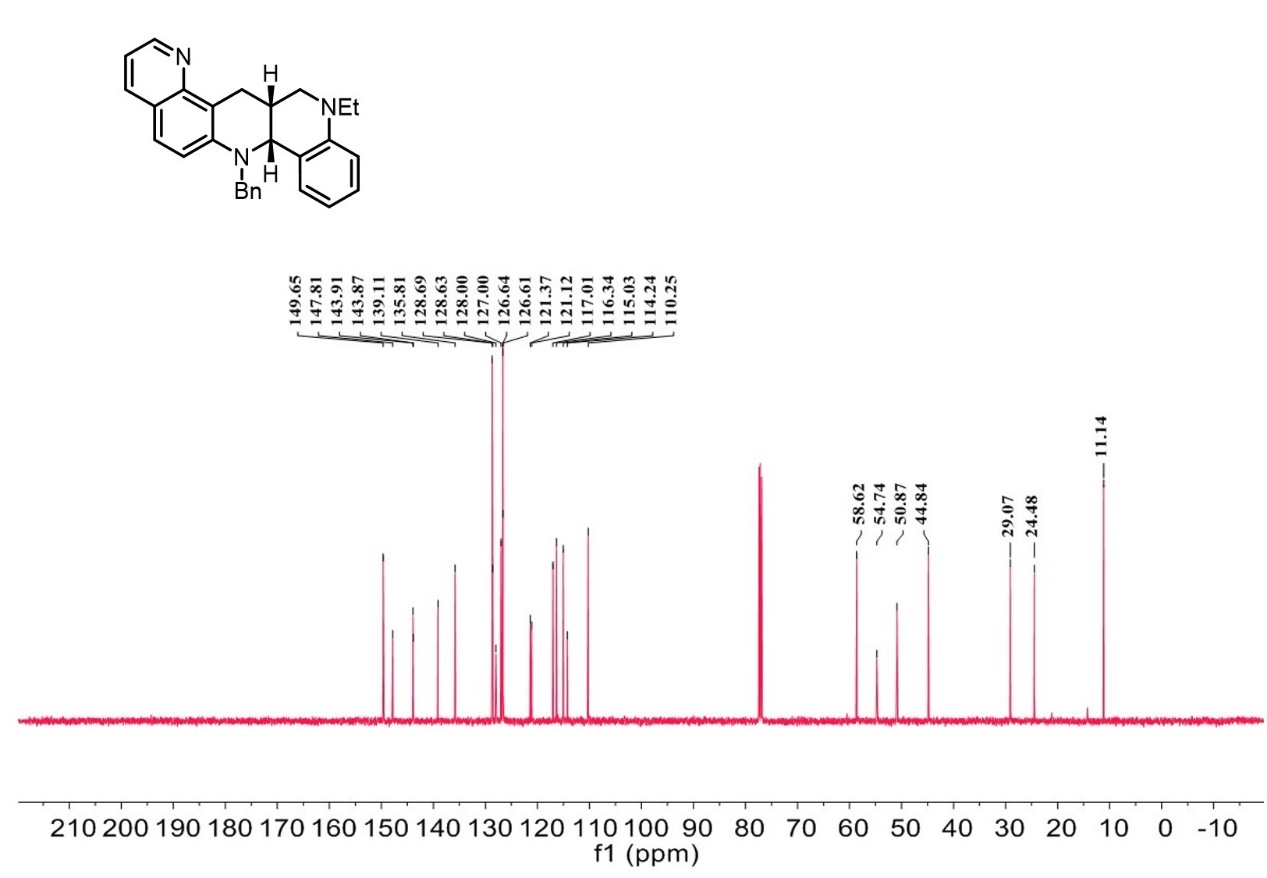
**

**1H-NMR spectrum of C46**

**
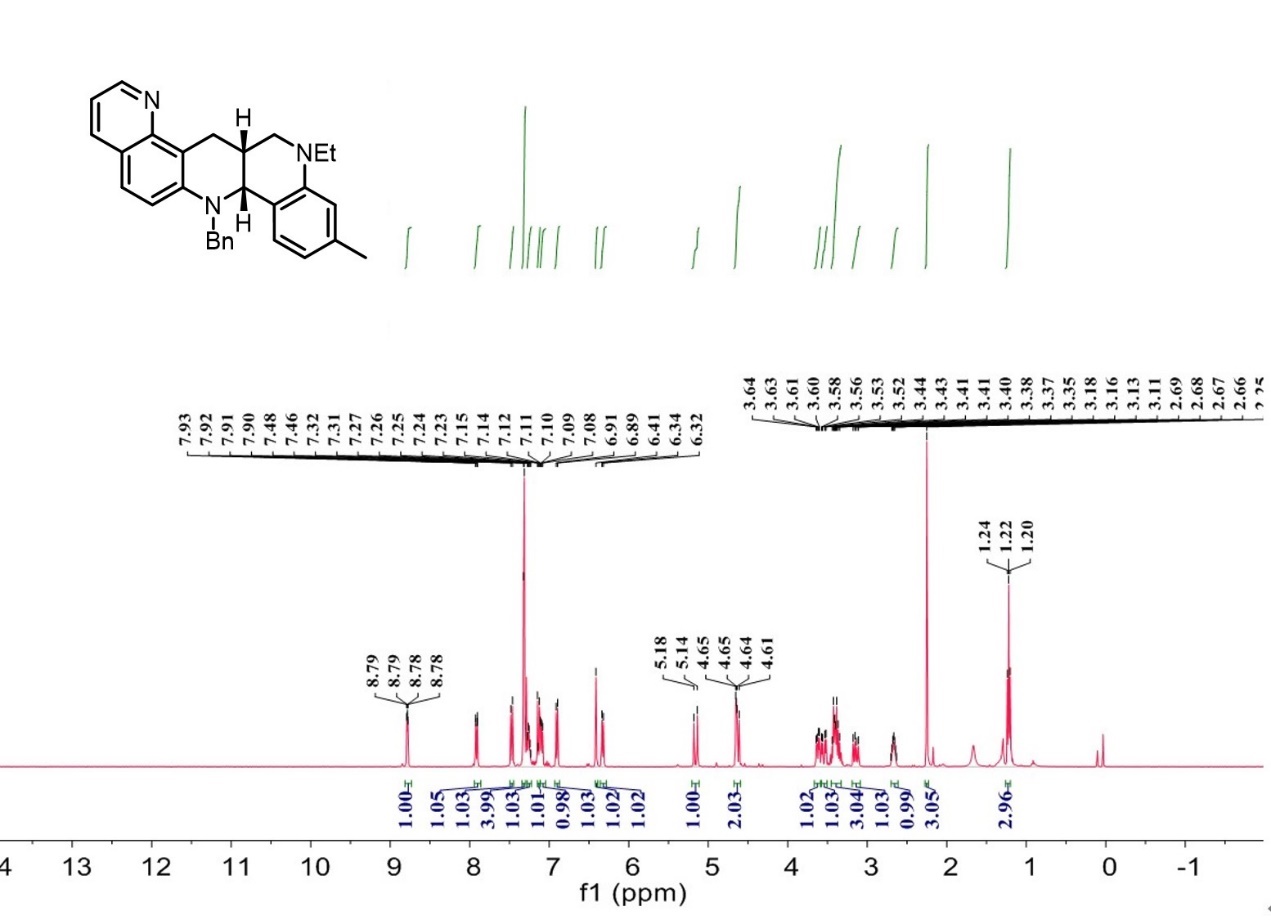
**

**13C-NMR spectrum of C46**

**
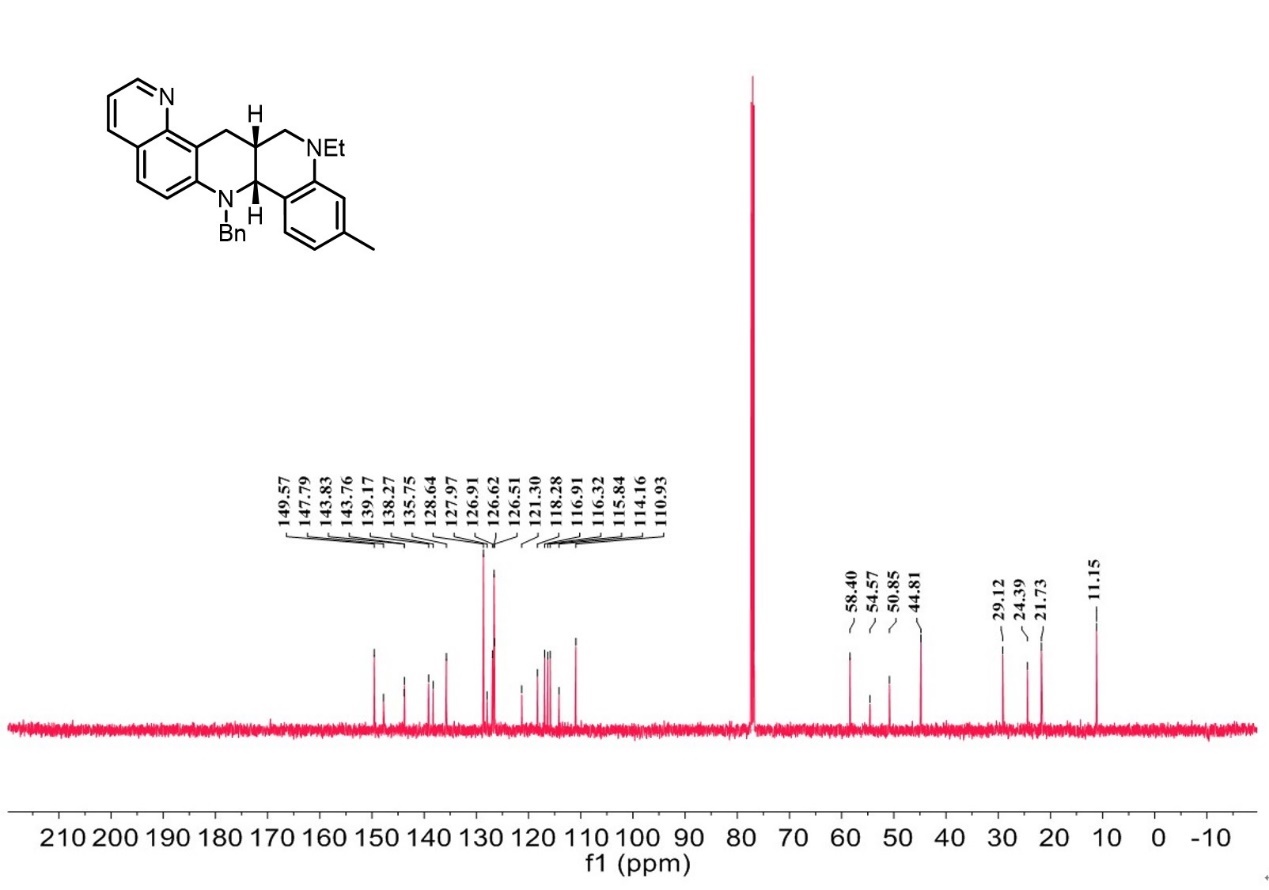
**

**1H-NMR spectrum of C47**

**
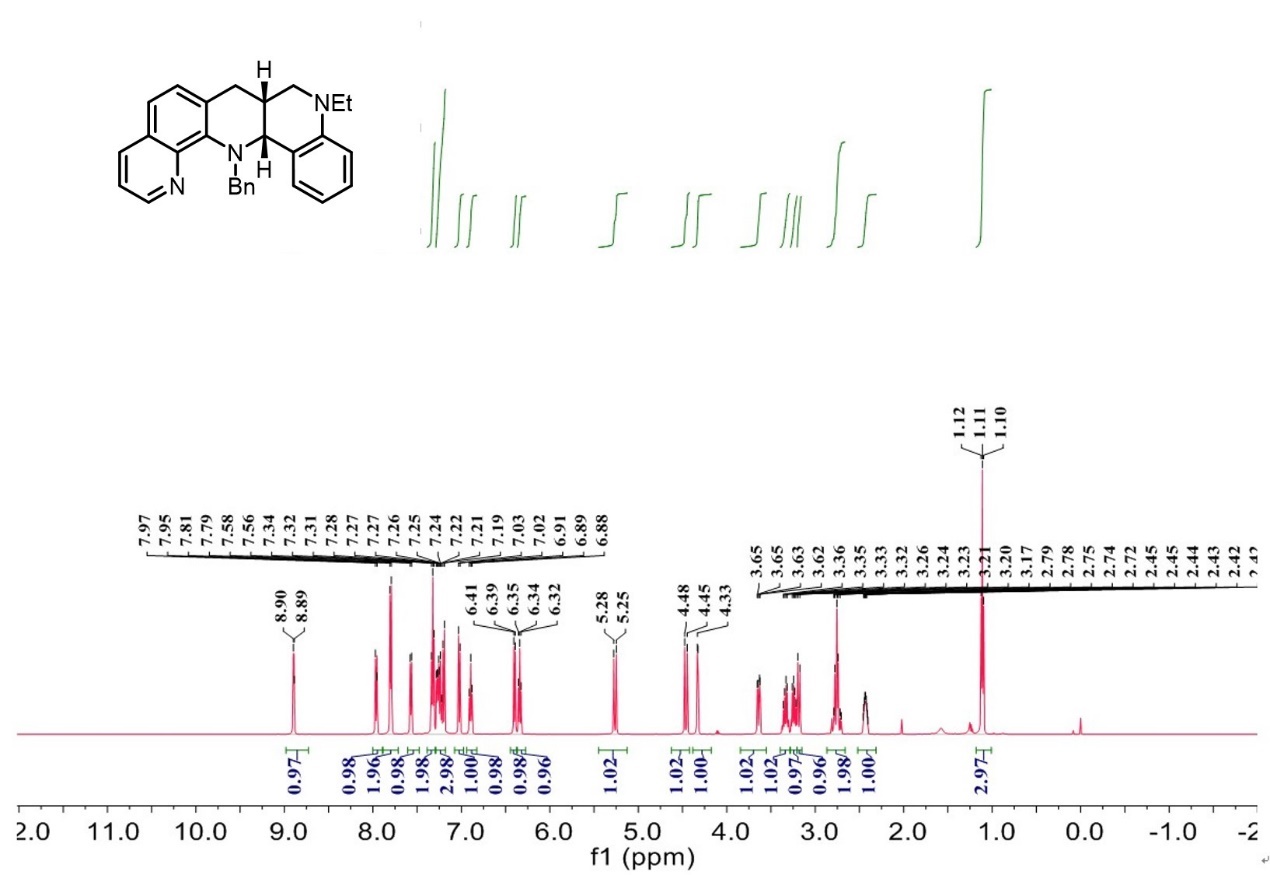
**

**13C-NMR spectrum of C47**

**
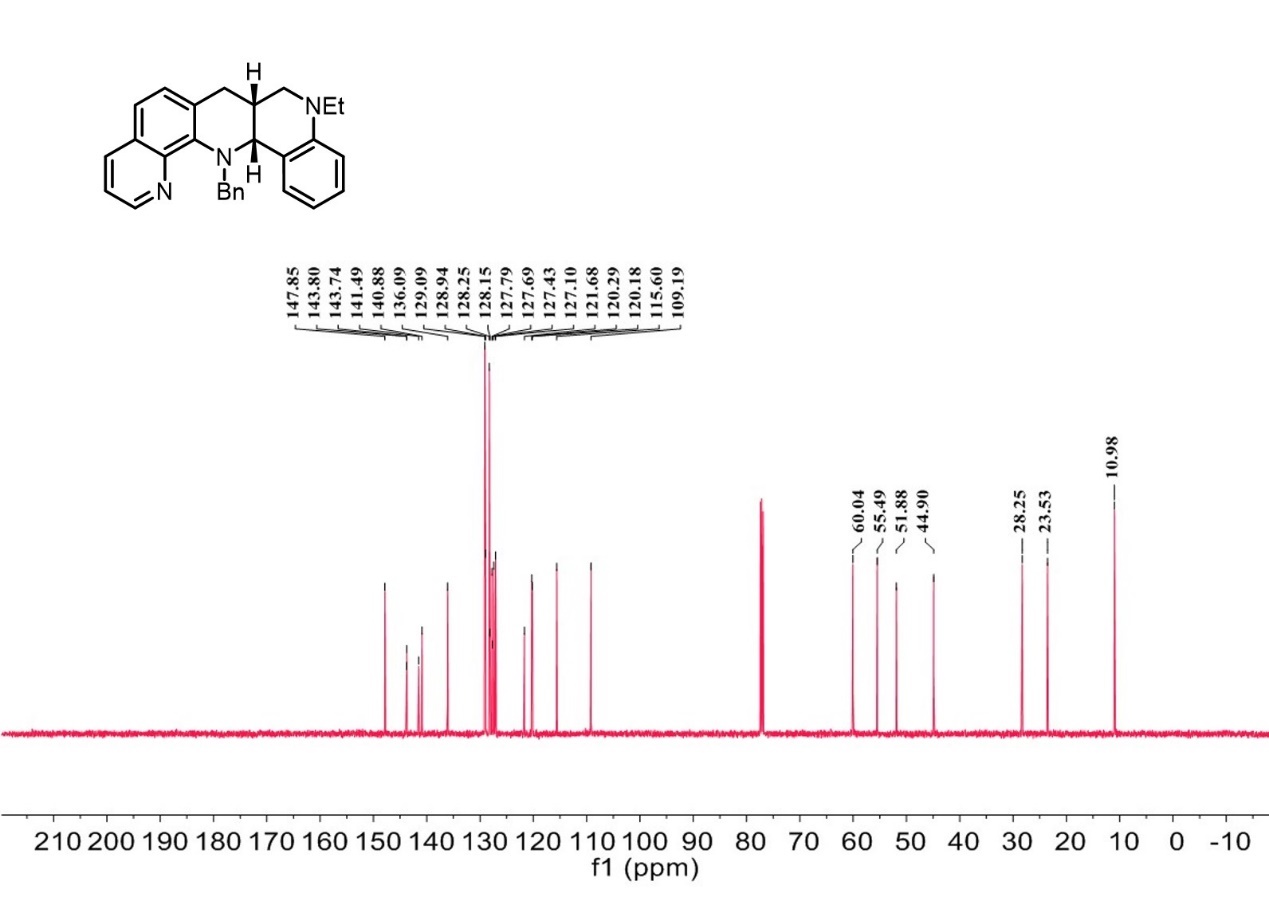
**

**1H-NMR spectrum of C48**


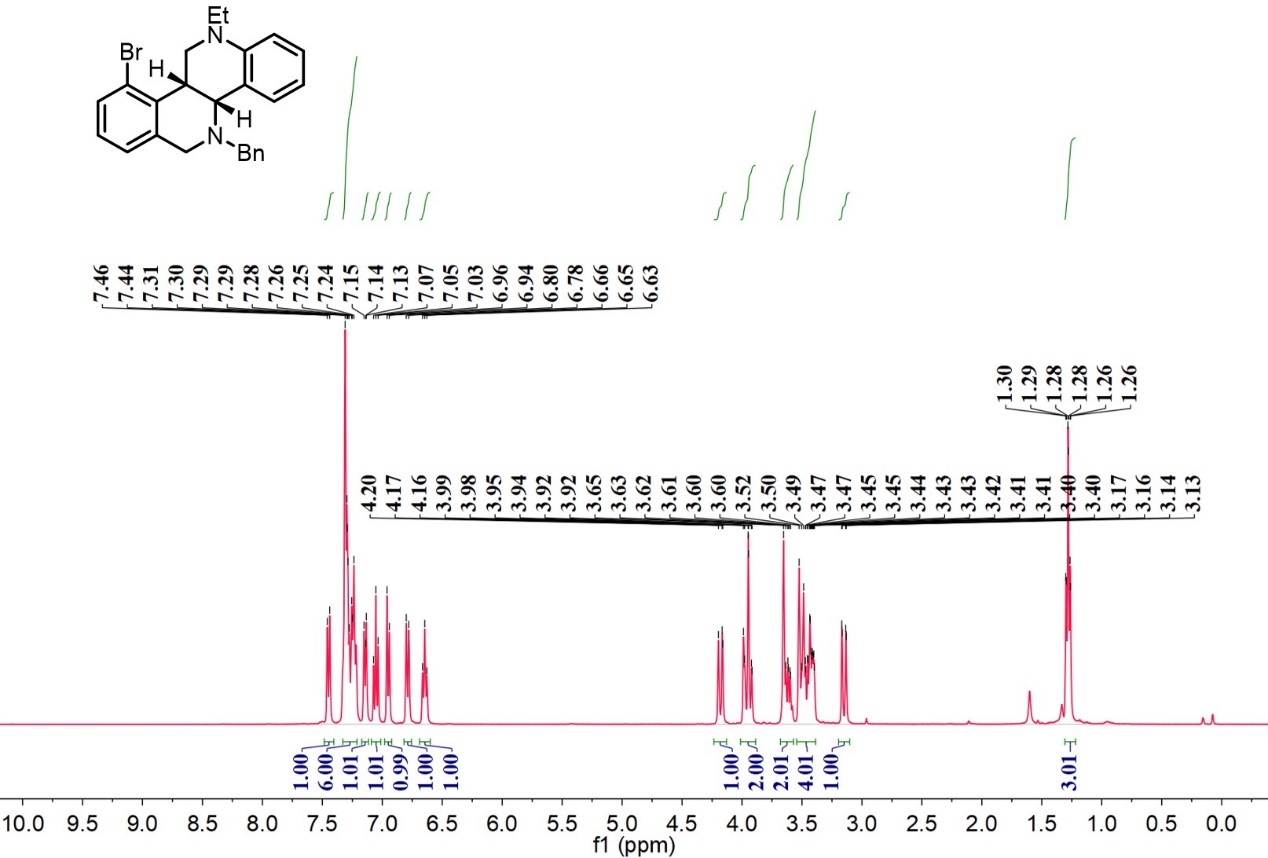


**13C-NMR spectrum of C48**

**
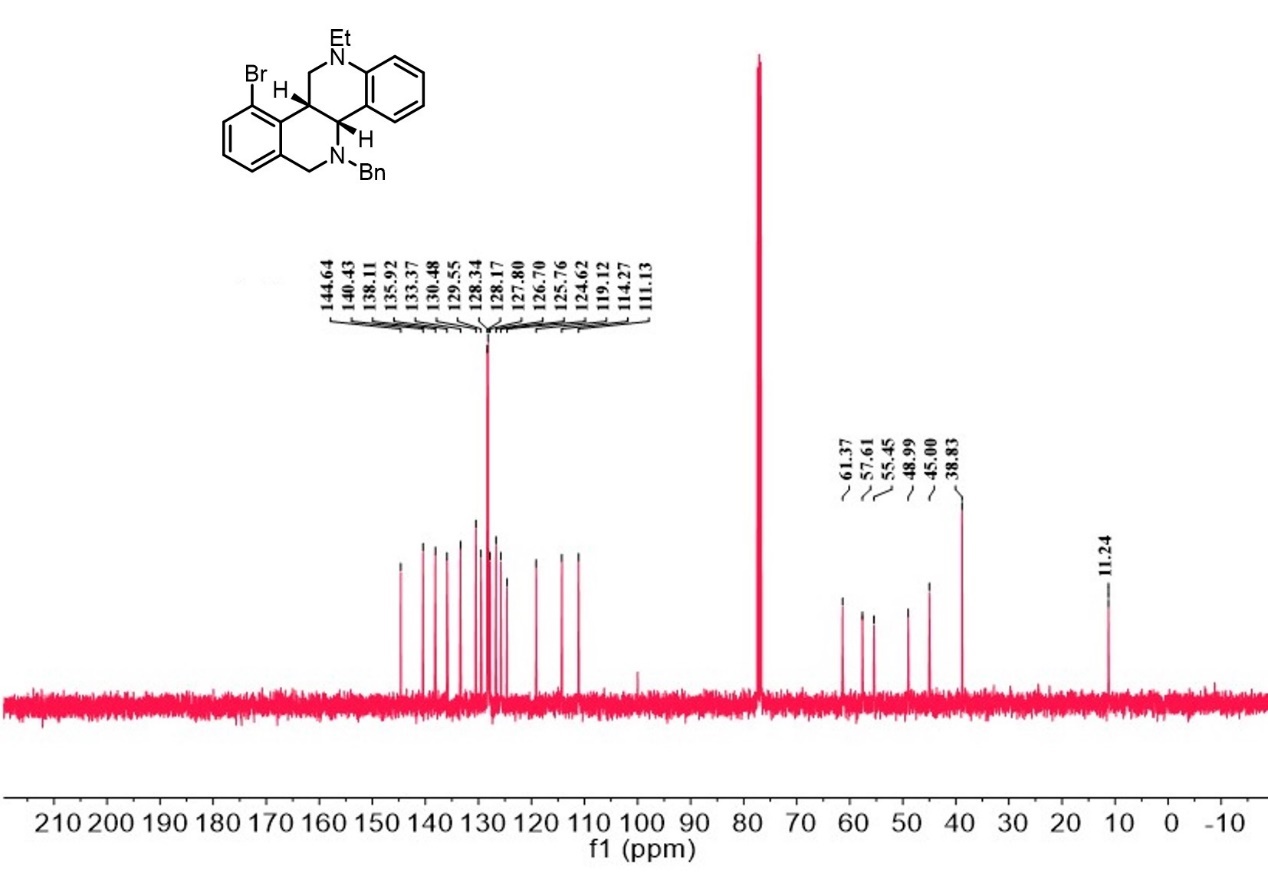
**

**1H-NMR spectrum of C49**

**
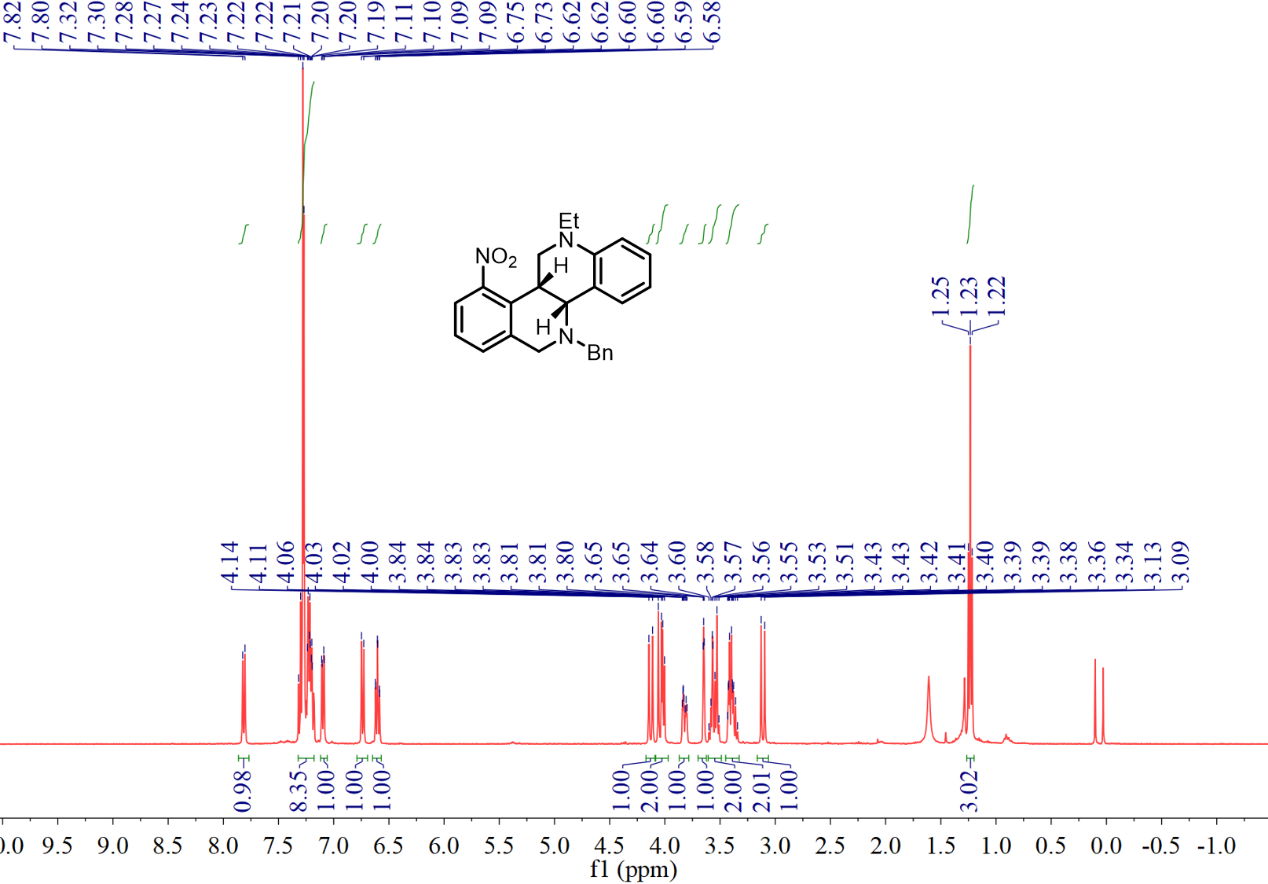
**

**13C-NMR spectrum of C49**

**1H-NMR spectrum of C50**

**13C-NMR spectrum of C50**

**1H-NMR spectrum of C51**

**13C-NMR spectrum of C51**

**1H-NMR spectrum of C52**

**13C-NMR spectrum of C52**

**1H-NMR spectrum of C53**

**13C-NMR spectrum of C53**

**1H-NMR spectrum of C54**

**13C-NMR spectrum of C54**

**1H-NMR spectrum of D1**

**13C-NMR spectrum of D1**

**1H-NMR spectrum of D2**

**13C-NMR spectrum of D2**

**1H-NMR spectrum of D3**

**13C-NMR spectrum of D3**

**1H-NMR spectrum of D4**

**13C-NMR spectrum of D4**

**1H-NMR spectrum of D5**

**13C-NMR spectrum of D5**

**19F-NMR spectrum of D5**

**1H-NMR spectrum of D6**

**13C-NMR spectrum of D6**

**1H-NMR spectrum of D7**

**13C-NMR spectrum of D7**

**1H-NMR spectrum of D8**

**13C-NMR spectrum of D8**

**1H-NMR spectrum of D9**

**13C-NMR spectrum of D9**

**1H-NMR spectrum of D10**

**13C-NMR spectrum of D10**

**19F-NMR spectrum of D10**

**1H-NMR spectrum of D11**

**13C-NMR spectrum of D11**

**1H-NMR spectrum of D12**

**13C-NMR spectrum of D12**

**1H-NMR spectrum of D13**

**13C-NMR spectrum of D13**

**1H-NMR spectrum of D14**

**13C-NMR spectrum of D14**

**1H-NMR spectrum of D15**

**13C-NMR spectrum of D15**

**1H-NMR spectrum of D16**

**13C-NMR spectrum of D16**

**1H-NMR spectrum of D17**

**13C-NMR spectrum of D17**

**1H-NMR spectrum of D18**

**13C-NMR spectrum of D18**

**1H-NMR spectrum of D19**

**13C-NMR spectrum of D19**

**19F-NMR spectrum of D19**

**1H-NMR spectrum of D20**

**13C-NMR spectrum of D20**

**1H-NMR spectrum of D21**

**13C-NMR spectrum of D21**

**1H-NMR spectrum of D22**

**13C-NMR spectrum of D22**

**1H-NMR spectrum of D23**

**13C-NMR spectrum of D23**

**1H-NMR spectrum of D24**

**13C-NMR spectrum of D24**

**1H-NMR spectrum of D25**

**13C-NMR spectrum of D25**

**1H-NMR spectrum of D26**

**13C-NMR spectrum of D26**

**1H-NMR spectrum of D27**

**13C-NMR spectrum of D27**

**1H-NMR spectrum of D28**

**13C-NMR spectrum of D28**

**1H-NMR spectrum of D29**

**13C-NMR spectrum of D29**

**1H-NMR spectrum of D30**

**13C-NMR spectrum of D30**

**1H-NMR spectrum of D31**

**13C-NMR spectrum of D31**

**1H-NMR spectrum of int-1**

**13C-NMR spectrum of int-1**

**1H-NMR spectrum of int-6**

**13C-NMR spectrum of int-6**
